# Supplementary material
Source: publisher figshare collection journal article supplement (https://acs.figshare.com/ndownloader/files/5177308)

# Total synthesis of (-)-borrelidin

Tohru Nagamitsu, Daisuke Takano, Takeo Fukuda, Kazuhiko Otoguro, Yoshihiro Harigaya, Isao Kuwajima and Satoshi Omura\*

## Supporting Information

**General Information.** All non-aqueous reactions were carried out under an inert atmosphere of argon. Organic solvents were dried over molecular sieves 3A or 4A. Other reagents were commercially available and used without further purification. Optical rotations were measured on a JASCO DIP-1000 digital polarimeter with a sodium lamp. Infrared spectra were recorded on a Horiba FT-210 and JASCO FT/IR-460.  $^1\text{H}$ -NMR and  $^{13}\text{C}$ -NMR spectra were recorded on a JEOL JNM-EX270. Ambiguous assignments were resolved on the basis of two-dimensional COSY experiments. High-resolution mass spectra were obtained on JEOL JMS-700 (FAB) and JEOL JMS-AX505HA (EI).

### (2*R*,4*S*)-5-Acetoxy-2,4-dimethylpentane-1-ol (**3**)

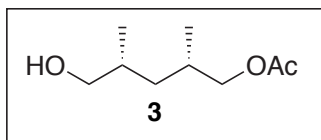

This compound was prepared according to Mori's procedure. (Fujita, K.; Mori, K. *Eur. J. Org. Chem.* **2001**, 66, 493-502.)

### (2*S*,4*R*)-1-Acetoxy-5-(*tert*-butyldimethylsilyloxy)-2,4-dimethylpentane (**3a**)

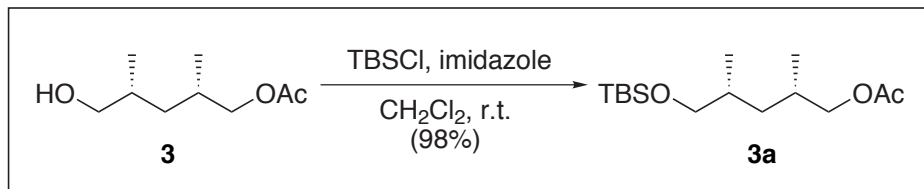

To a solution of **3** (1.01 g, 5.83 mmol) in  $\text{CH}_2\text{Cl}_2$  (20 ml) were added imidazole (790 mg, 11.6

mmol) and TBSCl (1.30 g, 8.74 mmol) at r.t.. The resulting solution was stirred for 30 min and quenched with water. The aqueous phase was extracted with CH<sub>2</sub>Cl<sub>2</sub>. The combined organic extracts were dried over anhydrous Na<sub>2</sub>SO<sub>4</sub> and concentrated in vacuo. Flash chromatography (30:1 hexanes/EtOAc) afforded **3a** (1.64 g, 98%) as a colorless oil.

$[\alpha]_D^{22} = +5.6^\circ$  ( $c = 0.24$ , CHCl<sub>3</sub>); **IR (KBr)** 2956, 2931, 2892, 2888, 1743, 1251, 1238 cm<sup>-1</sup>; **<sup>1</sup>H-NMR (270 MHz, CDCl<sub>3</sub>)**  $\delta$  0.01 (s, 6H, CH<sub>3</sub>Si), 0.87 (s, 9H, CH<sub>3</sub>CSi), 0.88 (d, 3H,  $J = 6.6$  Hz, C<sub>4</sub>-CH<sub>3</sub>), 0.90 (m, 1H, 1/2 C<sub>3</sub>-H), 0.92 (d, 3H,  $J = 6.6$  Hz, C<sub>2</sub>-CH<sub>3</sub>), 1.44 (m, 1H, 1/2 C<sub>3</sub>-H), 1.67 (m, 1H, C<sub>4</sub>-H), 1.88 (m, 1H, C<sub>2</sub>-H), 2.02 (s, 3H, COCH<sub>3</sub>), 3.34 (dd, 1H,  $J = 9.6, 6.3$  Hz, 1/2 C<sub>5</sub>-H), 3.41 (dd, 1H,  $J = 9.6, 5.6$  Hz, 1/2 C<sub>5</sub>-H), 3.80 (dd, 1H,  $J = 10.9, 6.9$  Hz, 1/2 C<sub>1</sub>-H), 3.94 (dd, 1H,  $J = 10.9, 5.3$  Hz, 1/2 C<sub>1</sub>-H); **<sup>13</sup>C-NMR (67.5 MHz, CDCl<sub>3</sub>)**  $\delta$  -5.4, 17.4, 17.8, 18.2, 20.9, 25.9, 30.0, 33.0, 37.4, 68.0, 69.3, 171.2; **HRMS [FAB, m-NBA]** calcd for C<sub>15</sub>H<sub>33</sub>O<sub>3</sub>Si [M+H<sup>+</sup>]: 289.2199; found: 289.2193.

**(2S,4R)-5-(tert-Butyldimethylsilyloxy)-2,4-dimethylpentan-1-ol (3b)**

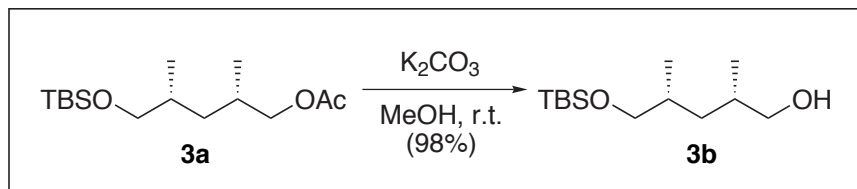

To a stirred solution of **3a** (1.64 g, 5.72 mmol) in MeOH (6 ml) was added potassium carbonate (870 mg, 6.29 mmol). The reaction was stirred at r.t. for 2h, and then diluted with water. The aqueous phase was extracted with EtOAc. The combined organic extracts were dried over anhydrous Na<sub>2</sub>SO<sub>4</sub> and concentrated in vacuo. Flash chromatography (10:1 hexanes/EtOAc) afforded **3b** (1.47 g, 98%) as a colorless oil.

$[\alpha]_D^{22} = +0.8^\circ$  ( $c = 0.32$ , CHCl<sub>3</sub>); **IR (KBr)** 3411, 2956, 2929, 2858, 1471, 1255, 1093, 837 cm<sup>-1</sup>; **<sup>1</sup>H-NMR (270 MHz, CDCl<sub>3</sub>)**  $\delta$  0.03 (s, 6H, CH<sub>3</sub>Si), 0.88 (m, 1H, 1/2 C<sub>3</sub>-H), 0.89 (s, 9H, CH<sub>3</sub>CSi), 0.90 (d, 3H,  $J = 6.6$  Hz, CH<sub>3</sub>), 0.93 (d, 3H,  $J = 6.6$  Hz, CH<sub>3</sub>), 1.42 (m, 1H, 1/2 C<sub>3</sub>-H), 1.70 (m, 1H, CH), 1.81 (m, 1H, CH), 3.32-3.52 (m, 4H, CH<sub>2</sub> x 2); **<sup>13</sup>C-NMR (67.5 MHz, CDCl<sub>3</sub>)**  $\delta$  -5.4, 17.7, 17.8, 18.3, 25.9, 33.2, 33.3, 37.3, 68.1, 68.3; **HRMS [FAB, m-NBA]** calcd for C<sub>13</sub>H<sub>31</sub>O<sub>2</sub>Si [M+H<sup>+</sup>]: 247.2093; found: 247.2079.

**(2*R*,4*S*)-5-(*tert*-Butyldiphenylsilyloxy)-2,4-dimethylpentan-1-ol (3c)**

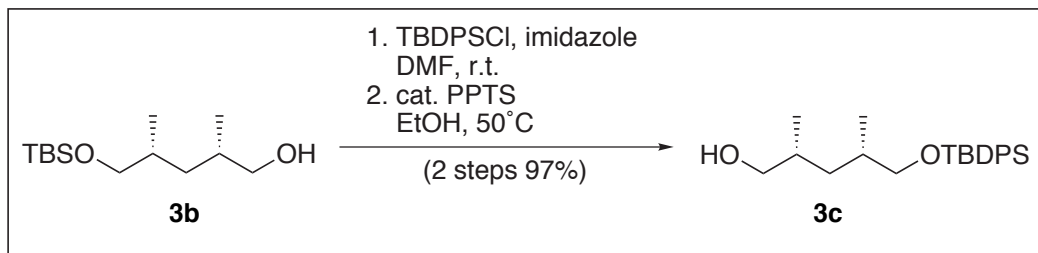

To a solution of **3b** (3.10 g, 12.6 mmol) in DMF (63 ml) were added imidazole (1.70 g, 25.2 mmol) and TBDPSCl (4.9 ml, 18.9 mmol) at 0°C. The reaction was allowed to warm to r.t. and stirred for 30 min. After addition of water, the reaction mixture was extracted with EtOAc. The combined organic extracts were dried over anhydrous Na<sub>2</sub>SO<sub>4</sub> and concentrated in vacuo. Flash chromatography (50:1 hexanes/EtOAc) afforded the corresponding disilyl ether (5.52 g) including unseparable impurities.

To a solution of the disilyl ether in EtOH (40 ml) was added PPTS (1.43 g, 5.70 mmol), and the mixture was allowed to warm up to 50°C. After 7h, water was added and the aqueous phase was extracted with EtOAc. The combined organic extracts were dried over anhydrous Na<sub>2</sub>SO<sub>4</sub> and concentrated in vacuo. Flash chromatography (15:1 hexanes/EtOAc) afforded **3c** (4.19 g, 2 steps 97%) as a colorless oil.

$[\alpha]_D^{23} = +1.8^\circ$  ( $c = 0.23$ , CHCl<sub>3</sub>); **IR** (KBr) 3455, 2931, 2856, 1112, 1091, 702 cm<sup>-1</sup>; **<sup>1</sup>H-NMR** (270 MHz, CDCl<sub>3</sub>)  $\delta$  0.91 (d, 3H,  $J = 6.6$  Hz, CH<sub>3</sub>), 0.95 (m, 1H, 1/2 C<sub>3</sub>-H), 0.98 (d, 3H,  $J = 6.6$  Hz, CH<sub>3</sub>), 1.08 (s, 9H, CH<sub>3</sub>CSi), 1.49 (m, 1H, 1/2 C<sub>3</sub>-H), 1.65 (m, 1H, CH), 1.76 (m, 1H, CH), 3.36 (dd, 1H,  $J = 10.2, 6.6$  Hz, 1/2 CH<sub>2</sub>), 3.45 (m, 1H, 1/2 CH<sub>2</sub>), 3.51 (dd, 1H,  $J = 9.6, 5.3$  Hz, 1/2 CH<sub>2</sub>), 3.55 (dd, 1H,  $J = 9.6, 5.3$  Hz, 1/2 CH<sub>2</sub>), 7.35-7.72 (m, 10H, ArH); **<sup>13</sup>C-NMR** (67.5 MHz, CDCl<sub>3</sub>)  $\delta$  17.4, 17.9, 19.3, 26.9, 33.1, 37.1, 68.2, 68.7, 127.6, 129.5, 134.0, 135.6; **HRMS** [FAB, m-NBA] calcd for C<sub>23</sub>H<sub>35</sub>O<sub>2</sub>Si [M+H<sup>+</sup>]: 371.2406; found: 371.2415.

**(2*R*,4*S*)-5-(*tert*-Butyldiphenylsilyloxy)-2,4-dimethylpentanal (4)**

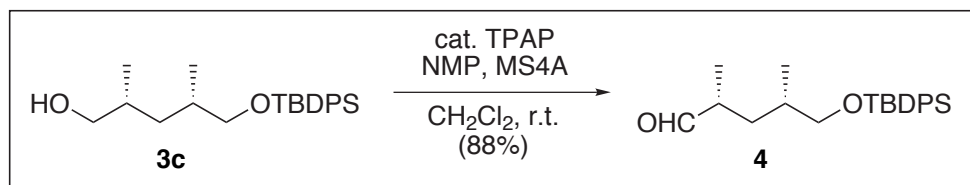

To a solution of **3c** (89.3 mg, 0.241 mmol) in CH<sub>2</sub>Cl<sub>2</sub> (2.5 ml) were added dried MS4A (500 mg),

NMO (31.1 mg, 0.265 mmol) and TPAP (4.2 mg, 12.0  $\mu$ mol) at r.t.. The resulting solution was stirred for 30 min and the reaction mixture was filtered through a silica pad. After evaporation of the filtrate, the residue was purified by flash chromatography (50:1 hexanes/EtOAc) to afford **4** (78.0 mg, 88%) as a colorless oil.

$[\alpha]_D^{23} = -6.3^\circ$  ( $c = 0.40$ ,  $\text{CHCl}_3$ ); **IR** (**KBr**) 2960, 2931, 2858, 1727, 1427, 1112, 1089  $\text{cm}^{-1}$ ;  **$^1\text{H}$ -NMR** (270 MHz,  $\text{CDCl}_3$ )  $\delta$  0.94 (d, 3H,  $J = 6.6$  Hz,  $\text{C}_4\text{-CH}_3$ ), 1.04 (d, 3H,  $J = 6.6$  Hz,  $\text{C}_2\text{-CH}_3$ ), 1.06 (s, 9H,  $\text{CH}_3\text{CSi}$ ), 1.14 (m, 1H,  $1/2$   $\text{C}_3\text{-H}$ ), 1.75 (m, 1H,  $\text{C}_4\text{-H}$ ), 1.90 (m, 1H,  $1/2$   $\text{C}_3\text{-H}$ ), 2.39 (m, 1H,  $\text{C}_2\text{-H}$ ), 3.49 (d, 2H,  $J = 5.6$  Hz,  $\text{C}_5\text{-H}$ ), 7.34-7.70 (m, 10H, ArH), 9.54 (d, 1H,  $J = 2.3$  Hz, CHO);  **$^{13}\text{C}$ -NMR** (67.5 MHz,  $\text{CDCl}_3$ )  $\delta$  14.1, 17.2, 19.3, 26.9, 33.3, 34.5, 44.1, 68.4, 127.6, 129.6, 133.7, 135.6, 205.2; **HRMS** [FAB, *m*-NBA] calcd for  $\text{C}_{23}\text{H}_{32}\text{O}_2\text{Si}$  [ $\text{M}^+$ ]: 368.2171; found: 368.2142.

**(3S)-1,1-Dibromo-4-(4'-methoxybenzyloxy)-3-methylbut-1-ene (5)**

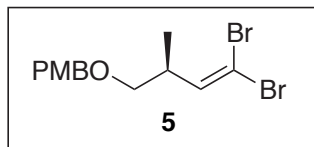

This compound was prepared by using a known method. (Paquette, L. A.; Guevel, R.; Sakamoto, S.; Kim, I. H.; Crawford, J. J. *Org. Chem.* **2003**, 68, 6096-6107.)

**(2S,6R,8S)-9-(tert-Butyldiphenylsilyloxy)-1-(4'-methoxybenzyloxy)-2,6,8-trimethylnona-3-yne (4a)**

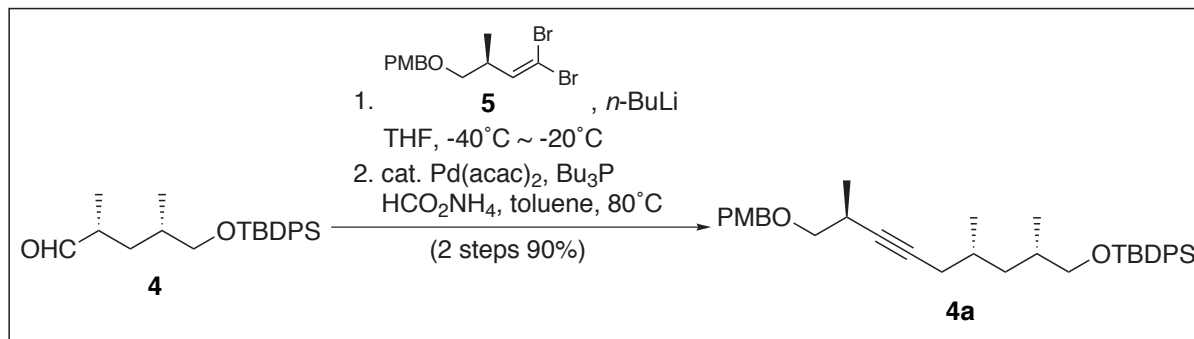

To a solution of **5** (83.0 mg, 0.229 mmol) in THF (700  $\mu$ l) was added *n*-BuLi (1.58 M solution in hexane, 290  $\mu$ l, 0.459 mmol) at  $-78^\circ\text{C}$ , and the mixture was allowed to warm up to  $-40^\circ\text{C}$ . The reaction was stirred for 1 h, and then treated with a solution of **4** (56.3 mg, 0.153 mmol) in THF

(700  $\mu$ l). The reaction was continued for 1 h at  $-30^{\circ}\text{C}$ , and methyl chloroformate (90  $\mu$ l, 1.15 mmol) was added at  $-20^{\circ}\text{C}$ . The reaction was quenched with sat. aq.  $\text{NH}_4\text{Cl}$ , and the aqueous phase was extracted with EtOAc. The combined organic extracts were dried over anhydrous  $\text{Na}_2\text{SO}_4$  and concentrated in vacuo. Flash chromatography (30:1 hexanes/EtOAc) afforded the corresponding carbonate (100.8 mg) including unseparable impurities.

To a solution of palladium acetylacetonate (2.3 mg, 7.65  $\mu$ mol) and tributylphosphine (8  $\mu$ l, 30.6  $\mu$ mol) in toluene (700  $\mu$ l) were added a solution of the crude carbonate in toluene (700  $\mu$ l) and ammonium formate (24.1 mg, 0.382 mmol). The resulting solution was warmed up to  $70^{\circ}\text{C}$  and stirred for 1 hr. Concentration in vacuo gave a yellow oil, which upon flash chromatography (50:1 hexanes/EtOAc) afforded **4a** (76.3 mg, 2 steps 90%) as a colorless oil.

$[\alpha]_{\text{D}}^{24} = -3.1^{\circ}$  ( $c = 0.29$ ,  $\text{CHCl}_3$ ); **IR (KBr)** 2910, 2898, 2856, 1513, 1459, 1112, 1106, 1091  $\text{cm}^{-1}$ ;  **$^1\text{H-NMR}$  (270 MHz,  $\text{CDCl}_3$ )**  $\delta$  0.95 (d, 6H,  $J = 6.6$  Hz,  $\text{C}_6\text{-CH}_3$  and  $\text{C}_8\text{-CH}_3$ ), 0.98 (m, 1H, 1/2  $\text{C}_7\text{-H}$ ), 1.08 (s, 9H,  $\text{CH}_3\text{CSi}$ ), 1.17 (d, 3H,  $J = 6.9$  Hz,  $\text{C}_2\text{-CH}_3$ ), 1.46 (m, 1H, 1/2  $\text{C}_7\text{-H}$ ), 1.68 (m, 1H,  $\text{C}_6\text{-H}$ ), 1.75 (m, 1H,  $\text{C}_8\text{-H}$ ), 1.97 (ddd, 1H,  $J = 16.2, 7.3, 1.7$  Hz, 1/2  $\text{C}_5\text{-H}$ ), 2.15 (ddd, 1H,  $J = 16.5, 4.9, 1.7$  Hz, 1/2  $\text{C}_5\text{-H}$ ), 2.70 (m, 1H,  $\text{C}_2\text{-H}$ ), 3.30 (m, 1H, 1/2  $\text{C}_1\text{-H}$ ), 3.48 (m, 3H,  $\text{C}_9\text{-H}$  and 1/2  $\text{C}_1\text{-H}$ ), 3.81 (s, 3H,  $\text{OCH}_3$ ), 4.48 (s, 2H,  $\text{CH}_2\text{Ph}$ ), 6.89 (d, 2H,  $J = 8.6$  Hz,  $\text{ArH}$ ), 7.28 (d, 2H,  $J = 8.6$  Hz,  $\text{ArH}$ ), 7.37-7.71 (m, 10H,  $\text{ArH}$ );  **$^{13}\text{C-NMR}$  (67.5 MHz,  $\text{CDCl}_3$ )**  $\delta$  ; 17.5, 18.3, 19.3, 20.1, 25.9, 26.7, 26.9, 30.1, 33.2, 40.1, 55.2, 69.0, 72.6, 74.3, 79.7, 83.0, 113.7, 127.5, 129.2, 129.5, 130.5, 134.0, 135.6, 159.1 **HRMS [FAB, m-NBA]** calcd for  $\text{C}_{36}\text{H}_{48}\text{O}_3\text{Si}$  [ $\text{M}+\text{H}^+$ ]: 556.3372; found: 556.3364.

**(2S,6R,8S)-9-(tert-Butyldiphenylsilyloxy)-2,6,8-trimethylnona-3-yn-1-ol (6)**

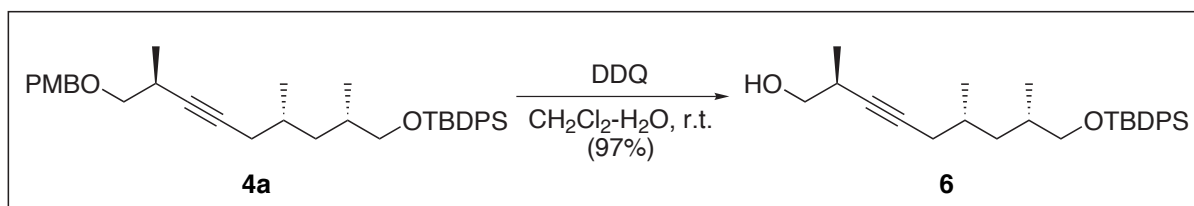

To a solution of **4a** (648.6 mg, 1.16 mmol) in  $\text{CH}_2\text{Cl}_2$  (12 ml) and  $\text{H}_2\text{O}$  (1.2 ml) was added DDQ (344.0 mg, 1.51 mmol) at r.t.. The reaction mixture was stirred for 30 min, and then diluted with water. The aqueous phase was extracted with EtOAc. The combined organic extracts were dried over anhydrous  $\text{Na}_2\text{SO}_4$  and concentrated in vacuo. Flash chromatography (30:1 hexanes/EtOAc) afforded **6** (494.1 mg, 97%) as a colorless oil.

$[\alpha]_D^{24} = -11.6^\circ$  ( $c = 0.26$ ,  $\text{CHCl}_3$ ); **IR** (**KBr**) 3644, 2964, 2960, 2931, 2325, 1112, 761  $\text{cm}^{-1}$ ;  **$^1\text{H}$ -NMR** (**270 MHz**,  **$\text{CDCl}_3$** )  $\delta$  0.96 (d, 6H,  $J = 6.6$  Hz,  $\text{C}_6\text{-CH}_3$  and  $\text{C}_8\text{-CH}_3$ ), 0.98 (m, 1H,  $1/2$   $\text{C}_7\text{-H}$ ), 1.08 (s, 9H,  $\text{CH}_3\text{CSi}$ ), 1.14 (d, 3H,  $J = 6.9$  Hz,  $\text{C}_2\text{-CH}_3$ ), 1.47 (m, 1H,  $1/2$   $\text{C}_7\text{-H}$ ), 1.70 (m, 1H,  $\text{C}_6\text{-H}$ ), 1.75 (m, 1H,  $\text{C}_8\text{-H}$ ), 1.98 (ddd, 1H,  $J = 16.5, 6.9, 1.7$  Hz,  $1/2$   $\text{C}_5\text{-H}$ ), 2.17 (ddd, 1H,  $J = 16.1, 5.0, 1.7$  Hz,  $1/2$   $\text{C}_5\text{-H}$ ), 2.64 (m, 1H,  $\text{C}_2\text{-H}$ ), 3.49 (m, 4H,  $\text{C}_1\text{-H}$  and  $\text{C}_9\text{-H}$ ), 7.37-7.71 (m, 10H, ArH);  **$^{13}\text{C}$ -NMR** (**67.5 MHz**,  **$\text{CDCl}_3$** )  $\delta$  17.3, 17.5, 19.3, 20.2, 25.8, 26.9, 29.5, 30.0, 33.2, 40.1, 67.1, 68.9, 81.1, 82.4, 127.6, 129.5, 134.0, 135.6; **HRMS** [**FAB**, **m-NBA**] calcd for  $\text{C}_{28}\text{H}_{40}\text{O}_2\text{SiNa}$  [ $\text{M}+\text{Na}^+$ ]: 459.2695; found: 459.2677.

**(2S,6R,8S)-9-(tert-Butyldiphenylsilyloxy)-2,4,6,8-tetramethylnona-3Z-en-1-ol (7)**

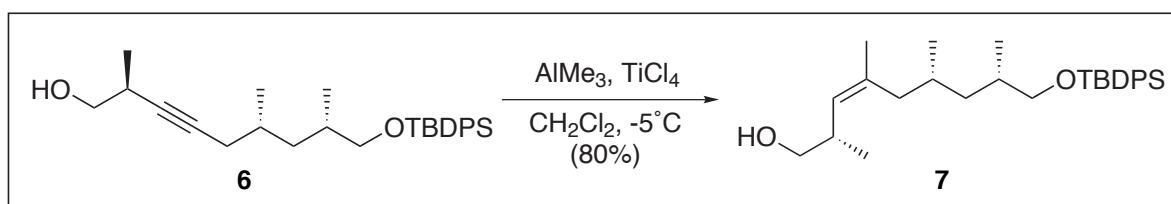

To a solution of trimethylaluminium (1.0 M solution in hexanes, 6.2 ml, 6.20 mmol) was added a solution of **6** (672.5 mg, 1.54 mmol) in  $\text{CH}_2\text{Cl}_2$  (3 ml) at  $0^\circ\text{C}$ . The mixture was allowed to warm to r.t., stirred for 20 min, and then cooled to  $-15^\circ\text{C}$ . The resulting solution was treated with titanium tetrachloride (1.0 M solution in  $\text{CH}_2\text{Cl}_2$ , 3.1 ml, 3.10 mmol) and continued for 15 min. The reaction was cooled to  $-40^\circ\text{C}$  and then cautiously quenched with ice-cooled MeOH (3 ml) followed by Celite<sup>®</sup> (10 g) and  $\text{Na}_2\text{SO}_4 \cdot 10\text{H}_2\text{O}$  (10 g). The mixture was allowed to warm to r.t. and stirred for 2 hr. The mixture was filtered through Celite<sup>®</sup> and the filtrate was concentrated in vacuo. The residue was purified by flash chromatography (40:1 hexanes/EtOAc) to afford **7** (557.1 mg, 80%) as a colorless oil.

$[\alpha]_D^{24} = -9.1^\circ$  ( $c = 0.17$ ,  $\text{CHCl}_3$ ); **IR** (**KBr**) 3444, 2960, 2931, 2896, 2869, 1473, 1459, 1450, 1427, 1105  $\text{cm}^{-1}$ ;  **$^1\text{H}$ -NMR** (**270 MHz**,  **$\text{CDCl}_3$** )  $\delta$  0.77 (d, 3H,  $J = 6.3$  Hz,  $\text{C}_6\text{-CH}_3$ ), 0.90 (d, 3H,  $J = 6.6$  Hz,  $\text{C}_2\text{-CH}_3$ ), 0.95 (d, 3H,  $J = 6.6$  Hz,  $\text{C}_8\text{-CH}_3$ ), 0.98 (m, 1H,  $1/2$   $\text{C}_7\text{-H}$ ), 1.06 (s, 9H,  $\text{CH}_3\text{CSi}$ ), 1.34 (m, 1H,  $1/2$   $\text{C}_7\text{-H}$ ), 1.66 (s, 3H,  $\text{C}_4\text{-CH}_3$ ), 1.70 (m, 1H,  $\text{C}_6\text{-H}$ ), 1.79 (m, 1H,  $\text{C}_8\text{-H}$ ), 1.90 (m, 2H,  $\text{C}_5\text{-H}$ ), 2.62 (m, 1H,  $\text{C}_2\text{-H}$ ), 3.28 (dd, 1H,  $J = 10.2, 8.2$  Hz,  $1/2$   $\text{C}_1\text{-H}$ ), 3.43 (m, 2H,  $1/2$   $\text{C}_1\text{-H}$  and  $1/2$   $\text{C}_9\text{-H}$ ), 3.52 (dd, 1H,  $J = 9.8, 5.1$  Hz,  $1/2$   $\text{C}_9\text{-H}$ ), 4.93 (d, 1H,  $J = 9.6$  Hz,  $\text{C}_3\text{-H}$ ), 7.30-7.70 (m, 10H, ArH);  **$^{13}\text{C}$ -NMR** (**67.5 MHz**,  **$\text{CDCl}_3$** )  $\delta$  17.1, 17.7, 19.3, 19.7, 23.7, 27.0, 28.3, 33.2, 35.2, 39.5, 41.5, 67.9, 68.9, 127.5, 128.8, 129.5, 134.0, 135.5, 137.0; **HRMS** [**FAB**, **m-**

**NBA]** calcd for C<sub>29</sub>H<sub>44</sub>O<sub>2</sub>SiNa [M+Na<sup>+</sup>]: 475.3008; found: 475.3022.

The stereochemistry of C8-9 olefin was determined by NOE experiment.

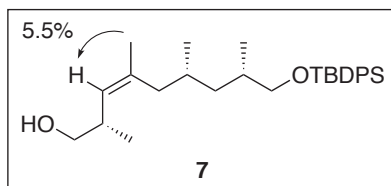

NOE experiment of **7**

**(2*S*,4*R*,6*S*,8*S*)-9-(*tert*-Butyldiphenylsilyloxy)-2,4,6,8-tetramethylnonan-1-ol (**8**)**

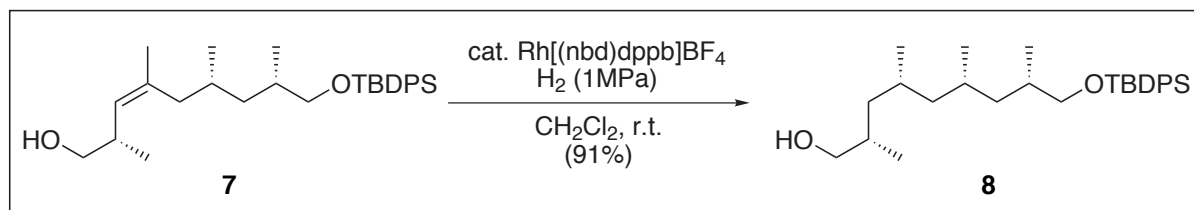

A solution of **7** (941.3 mg, 2.08 mmol) and Rh[(nbd)dppb]BF<sub>4</sub> (147.5 mg, 0.208 mmol) in CH<sub>2</sub>Cl<sub>2</sub> (4 ml) was stirred under 1 Mpa of H<sub>2</sub> gas for 2 hr. The resulting solution was filtered through a short plug of silica gel and concentrated in vacuo. The residue was purified by flash chromatography (40:1 hexanes/EtOAc) to afford **8** (928.5 mg, 91%) as a colorless oil.

[ $\alpha$ ]<sub>D</sub><sup>25</sup> = -16.6° (*c* = 0.15, CHCl<sub>3</sub>); **IR** (KBr) 3425, 2958, 2929, 2858, 1461, 1427, 1112, 1081 cm<sup>-1</sup>; **<sup>1</sup>H-NMR** (270 MHz, CDCl<sub>3</sub>)  $\delta$  0.83 (d, 3H, *J* = 6.3 Hz, CH<sub>3</sub>), 0.84 (d, 3H, *J* = 6.6 Hz, CH<sub>3</sub>), 0.85 (m, 1H, 1/2 CH<sub>2</sub>), 0.89 (d, 3H, *J* = 6.9 Hz, CH<sub>3</sub>), 0.93 (m, 1H, 1/2 CH<sub>2</sub>), 0.95 (d, *J* = 6.6 Hz, CH<sub>3</sub>), 1.03 (m, 2H, CH<sub>2</sub>), 1.07 (s, 9H, CH<sub>3</sub>CSi), 1.12 (m, 1H, 1/2 CH<sub>2</sub>), 1.33 (m, 1H, 1/2 CH<sub>2</sub>), 1.52 (m, 1H, CH), 1.57 (m, 1H, CH), 1.70 (m 2H, CH x 2), 3.36-3.59 (m, 4H, CH<sub>2</sub> x 2), 7.30-7.74 (m, 10H, ArH); **<sup>13</sup>C-NMR** (67.5 MHz, CDCl<sub>3</sub>)  $\delta$  16.0, 18.0, 19.2, 20.2, 20.5, 26.8, 27.0, 27.4, 33.1, 33.2, 39.9, 41.5, 46.1, 68.8, 69.2, 127.5, 129.4, 134.0, 135.5; **HRMS** [FAB, *m*-NBA] calcd for C<sub>29</sub>H<sub>46</sub>O<sub>2</sub>SiNa [M+Na<sup>+</sup>]: 477.3164; found: 477.3266.

**(2*S*,4*S*,6*R*,8*S*)-1-(*tert*-Butyldiphenylsilyloxy)-2,4,6,8-tetramethyl-9-(tetrahydropyran-2'-yloxy)nonane (**8a**)**

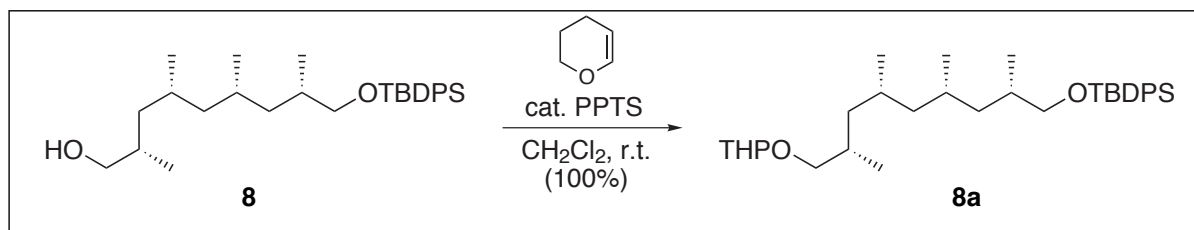

To a solution of **8** (928.5 mg, 2.05 mmol) in CH<sub>2</sub>Cl<sub>2</sub> (20 ml) were added dihydropyran (1.85 ml, 20.5 mmol) and PPTS (51 mg, 0.205 mmol). The resulting solution was stirred at r.t. for 2 hr. The reaction was quenched with sat. aq. NaHCO<sub>3</sub> solution and the aqueous phase was extracted with CH<sub>2</sub>Cl<sub>2</sub>. The combined organic extracts were dried over anhydrous Na<sub>2</sub>SO<sub>4</sub> and concentrated in vacuo. Flash chromatography (50:1 hexanes/EtOAc) afforded **8a** (1.10 g, 100%) as a colorless oil.

$[\alpha]_D^{25} = -10.5^\circ$  ( $c = 0.19$ , CHCl<sub>3</sub>); **IR** (KBr) 3450, 2956, 2929, 2366, 1473, 1461, 1079 cm<sup>-1</sup>; **<sup>1</sup>H-NMR** (270 MHz, CDCl<sub>3</sub>)  $\delta$  0.82 (d, 3H,  $J = 6.6$  Hz, CH<sub>3</sub>), 0.83 (d, 3H,  $J = 6.6$  Hz, CH<sub>3</sub>), 0.84 (m, 1H, 1/2 CH<sub>2</sub>), 0.91 (d, 3H,  $J = 6.3$  Hz, CH<sub>3</sub>), 0.92 (m, 1H, 1/2 CH<sub>2</sub>), 0.94 (d, 3H,  $J = 6.6$  Hz, CH<sub>3</sub>), 1.03 (m, 2H, CH<sub>2</sub>), 1.07 (s, 9H, CH<sub>3</sub>CSi), 1.09 (m, 1H, 1/2 CH<sub>2</sub>), 1.29 (m, 1H, 1/2 CH<sub>2</sub>), 1.47-1.80 (m, 10H, THP(6H) and CH  $\times$  4), 3.17 (m, 1H, THP(1H)), 3.39-3.61 (m, 4H, 1/2 CH<sub>2</sub>, CH<sub>2</sub> and THP(1H)), 3.87 (m, 1H, 1/2 CH<sub>2</sub>), 4.58 (m, 1H, THP(1H)), 7.35-7.71 (m, 10H, ArH); **<sup>13</sup>C-NMR** (67.5 MHz, CDCl<sub>3</sub>)  $\delta$  16.7, 16.8, 17.9, 18.0, 19.3, 19.5, 19.6, 20.3, 20.6, 20.7, 25.6, 26.8, 27.0, 27.1, 27.4, 30.7, 30.8, 30.9, 33.1, 40.6, 41.4, 46.1, 62.0, 62.2, 68.8, 73.8, 74.0, 98.6, 99.0, 127.5, 129.5, 134.1, 135.6; **HRMS** [FAB, m-NBA] calcd for C<sub>34</sub>H<sub>54</sub>O<sub>3</sub>SiNa [M+Na<sup>+</sup>]: 561.3739; found: 561.3741.

**(2*S*,4*S*,6*R*,8*S*)-2,4,6,8-Tetramethyl-9-(tetrahydropyran-2'-yloxy)nonan-1-ol (**8b**)**

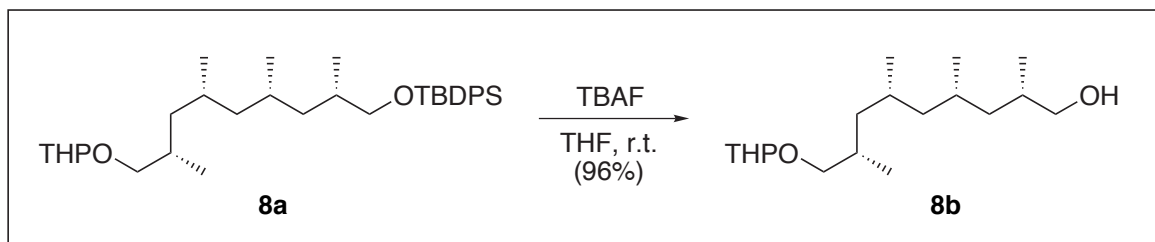

To a stirred solution of **8a** (1.10 g, 2.05 mmol) in THF (20 ml) was added TBAF (1.0 M solution



in THF, 5 ml, 5.00 mmol). The resulting solution was stirred for 3 hr, quenched with sat. aq.  $\text{NH}_4\text{Cl}$  solution, and extracted with EtOAc. The combined organic extracts were dried over anhydrous  $\text{Na}_2\text{SO}_4$  and concentrated in vacuo. Flash chromatography (10:1 hexanes/EtOAc) afforded **8b** (590.3 mg, 96%) as a colorless oil.

$[\alpha]_{\text{D}}^{25} = -13.7^\circ$  ( $c = 0.29$ ,  $\text{CHCl}_3$ ); **IR** (**KBr**) 3422, 2957, 2922, 2871, 2359, 1457, 1377, 1261, 1201, 1118  $\text{cm}^{-1}$ ;  **$^1\text{H}$ -NMR** (270 MHz,  $\text{CDCl}_3$ )  $\delta$  0.81 (d, 3H,  $J = 6.9$  Hz,  $\text{CH}_3$ ), 0.84 (d, 3H,  $J = 7.3$  Hz,  $\text{CH}_3$ ), 0.89 (d, 3H,  $J = 6.0$  Hz,  $\text{CH}_3$ ), 0.90 (d, 3H,  $J = 6.9$  Hz,  $\text{CH}_3$ ), 0.92 (m, 2H,  $1/2 \text{CH}_2 \times 2$ ), 1.01-1.32 (m, 4H,  $1/2 \text{CH}_2 \times 2$  and  $\text{CH}_2$ ), 1.48-1.86 (m, 10H,  $\text{CH} \times 4$  and THP(6H)), 3.15 (m, 1H, THP(1H)), 3.34 (dd, 1H,  $J = 10.2, 6.9$  Hz,  $1/2 \text{CH}_2$ ), 3.41-3.58 (m, 3H, THP(1H) and  $1/2 \text{CH}_2 \times 2$ ), 3.84 (m, 1H,  $1/2 \text{CH}_2$ ), 4.54 (m, 1H, THP(1H));  **$^{13}\text{C}$ -NMR** (67.5 MHz,  $\text{CDCl}_3$ ) 16.7, 16.8, 17.4, 17.5, 19.4, 19.6, 20.3, 20.6, 20.8, 25.5, 27.1, 27.2, 27.4, 30.6, 30.7, 30.8, 33.0, 40.5, 41.3, 45.8, 62.0, 68.1, 68.2, 73.6, 73.9, 98.6, 99.0; **HRMS** [FAB, **m-NBA**] calcd for  $\text{C}_{18}\text{H}_{37}\text{O}_3$   $[\text{M}+\text{H}^+]$ : 301.2742; found: 301.2746.

**(2S,4S,6R,8S)-2,4,6,8-Tetramethyl-9-(tetrahydropyran-2'-yloxy)nonanal (9)**

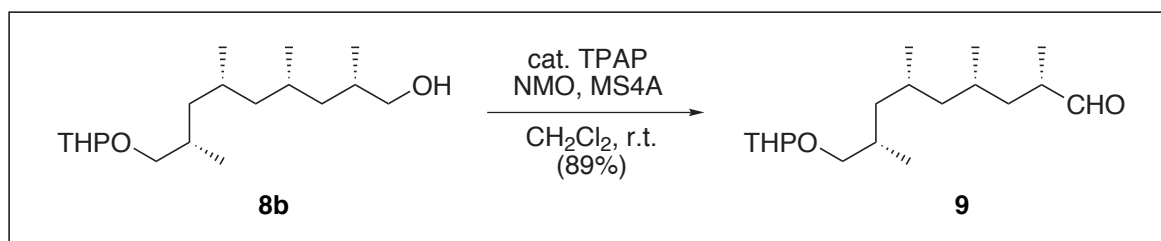

To a solution of **8b** (388.6 mg, 1.30 mmol) in  $\text{CH}_2\text{Cl}_2$  (13 ml) were added MS4A (1 g), NMO (321 mg, 2.70 mmol) and TPAP (24.0 mg, 68.5  $\mu\text{mol}$ ). The reaction was stirred at r.t. for 30 min, and then filtered through a silica pad. After evaporation of the filtrate, the residue was purified by flash chromatography (40:1 hexanes/EtOAc) to afford **9** (343.6 mg, 89%) as a colorless oil.

$[\alpha]_{\text{D}}^{25} = +1.0^\circ$  ( $c = 0.14$ ,  $\text{CHCl}_3$ ); **IR** (**KBr**) 2955, 2873, 1734, 1488, 1457, 1261, 1031  $\text{cm}^{-1}$ ;  **$^1\text{H}$ -NMR** (270 MHz,  $\text{CDCl}_3$ )  $\delta$  0.81 (d, 3H,  $J = 6.3$  Hz,  $\text{CH}_3$ ), 0.87 (d, 6H,  $J = 6.3$  Hz,  $\text{CH}_3 \times 2$ ), 1.00-1.07 (m, 5H,  $\text{CH}_2 \times 2$  and  $1/2 \text{CH}_2$ ), 1.16 (d, 3H,  $J = 6.9$  Hz,  $\text{CH}_3$ ), 1.47-1.87 (m, 10H, THP(6H),  $\text{CH} \times 3$  and  $1/2 \text{CH}_2$ ), 2.56 (m, 1H,  $\text{CH}$ ), 3.16 (m, 1H, THP(1H)), 3.40-3.58 (m, 2H,  $1/2 \text{CH}_2$  and THP(1H)), 3.85 (m, 1H,  $1/2 \text{CH}_2$ ), 4.56 (m, 1H, THP(1H)), 9.57 (d, 1H,  $J = 2.3$  Hz,  $\text{CHO}$ );  **$^{13}\text{C}$ -NMR** (67.5 MHz,  $\text{CDCl}_3$ )  $\delta$  16.8, 16.9, 18.0, 19.4, 19.6, 19.8, 20.1, 25.5, 27.0, 27.1, 28.0, 30.6, 30.7, 30.8, 37.2, 40.9, 41.1, 45.9, 62.0, 62.2, 73.6, 73.9, 98.6, 99.0, 182.7; **HRMS**

[FAB, m-NBA] calcd for  $C_{18}H_{34}O_3Na$  [ $M+Na^+$ ]: 321.2405; found: 321.2391.

**(3'S,4R,4'S,6'S,8'R,10'S)-4-Benzyl-3-[3'-hydroxy-4',6',8',10'-tetramethyl-11'-(tetrahydropyran-2''-yloxy)undecanoyl]-2-oxazolidinone (9a)**

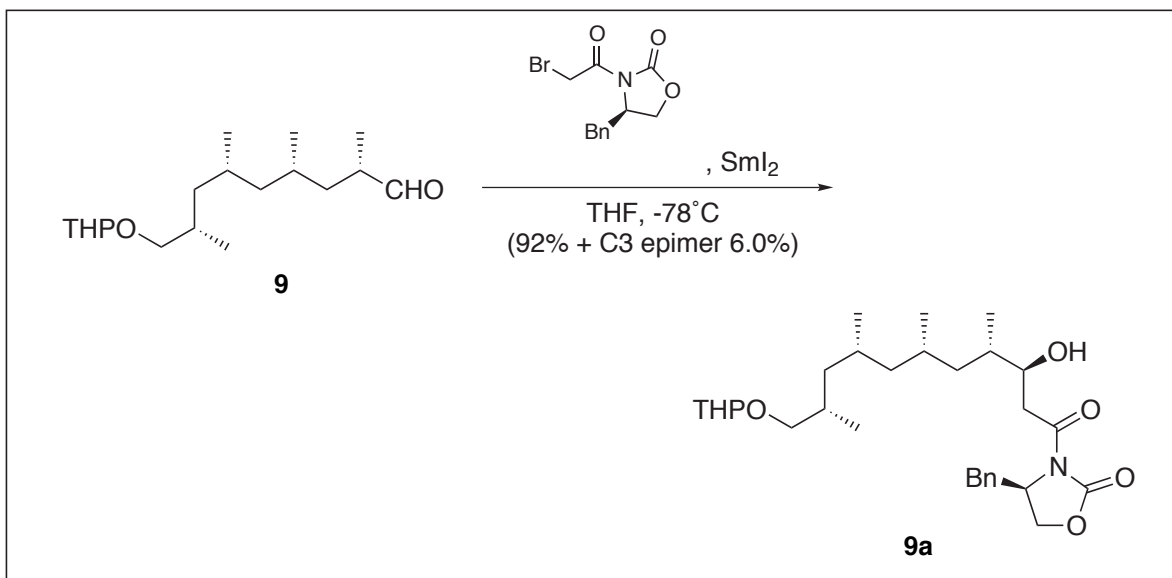

To a solution of samarium iodide (0.1 M solution in THF, 58.0 ml, 5.80 mmol) were added **9** (343.6 mg, 1.15 mmol) and (R)-4-benzyl-3-bromoacetyl-2-oxazolidinone (376.0 mg, 1.26 mmol) in THF (11 ml) at  $-78^\circ C$ . The reaction was stirred for 20 min and then treated with hexane (100 ml) followed by silica gel (50 g). The mixture was allowed to warm to r.t. and stirred for 30 min. The mixture was filtered through a short plug of silica gel and concentrated in vacuo. The residue was purified by flash chromatography (5:1 hexanes/EtOAc) to afford **9a** (550.7 mg, 92%) along with its epimer (40.0 mg, 6.2%).

$[\alpha]_D^{26} = -43.8^\circ$  ( $c = 0.25$ ,  $CHCl_3$ ); **IR (KBr)** 3566, 2955, 1785, 1698, 1456, 1386, 1199, 1030  $cm^{-1}$ ;  **$^1H$ -NMR (270 MHz,  $CDCl_3$ )**  $\delta$  0.85 (d, 3H,  $J = 5.9$  Hz,  $CH_3$ ), 0.87 (d, 3H,  $J = 5.3$  Hz,  $CH_3$ ), 0.89 (d, 3H,  $J = 5.0$  Hz,  $CH_3$ ), 0.93 (d, 3H,  $J = 6.3$  Hz,  $CH_3$ ), 0.98-1.14 (m, 3H,  $CH_2$  and 1/2  $CH_2$ ), 1.25 (m, 2H,  $CH_2$ ), 1.42-1.74 (m, 10H, THP(6H),  $CH_2$ x3 and 1/2  $CH_2$ ), 1.83 (m, 1H,  $CH$ ), 2.79 (dd, 1H,  $J = 13.2, 9.6$  Hz, 1/2  $CH_2Ph$ ), 3.07 (d, 2H,  $J = 6.3$  Hz,  $C_2-H$ ), 3.19 (m, 1H, THP(1H)), 3.31 (dd, 1H,  $J = 13.2, 2.6$  Hz, 1/2  $CH_2Ph$ ), 3.48 (m, 1H, 1/2  $C_{11}-H$ ), 3.54 (m, 1H, THP(1H)), 3.86 (m, 1H, 1/2  $C_{11}-H$ ), 4.10 (m, 1H,  $C_4-H$ ), 4.21 (m, 2H,  $NCHCH_2$ ), 4.57 (m, 1H, THP(1H)), 4.69 (m, 1H,  $NCH$ ), 7.18-7.36 (m, 5H, ArH);  **$^{13}C$ -NMR (67.5 MHz,  $CDCl_3$ )**  $\delta$  14.5, 16.7, 16.8, 19.4, 19.6, 20.3, 20.7, 25.5, 27.1, 27.2, 30.6, 30.8, 30.9, 35.2, 37.9, 40.4, 40.5, 40.9,

45.6, 55.1, 62.2, 61.9, 66.3, 70.2, 70.3, 73.7, 73.9, 98.6, 99.0, 127.3, 128.9, 129.3, 135.1, 153.4, 173.1; **HRMS [FAB, m-NBA]** calcd for C<sub>30</sub>H<sub>47</sub>O<sub>6</sub>NNa [M+Na<sup>+</sup>]: 540.3301; found: 540.3309.

Absolute configuration of C3 was determined by modified Mosher ester analysis.\*

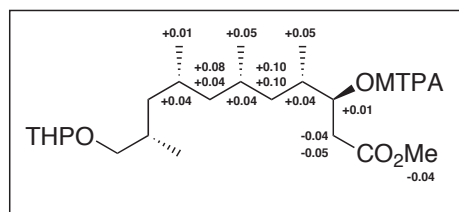

$\Delta\delta = (\delta_S - \delta_R)$  for (*R*)- and (*S*)-MTPA derivatives

\* Ohtani, I.; Kusumi, J.; Kashman, Y.; Kakisawa, H. *J. Am. Chem. Soc.* **1991**, *113*, 4092.

**(3*S*,4*S*,6*S*,8*R*,10*S*)-3-(*tert*-Butyldimethylsilyloxy)-4,6,8,10-tetramethyl-11-(tetrahydropyran-2'-yloxy)undecanoic acid (10)**

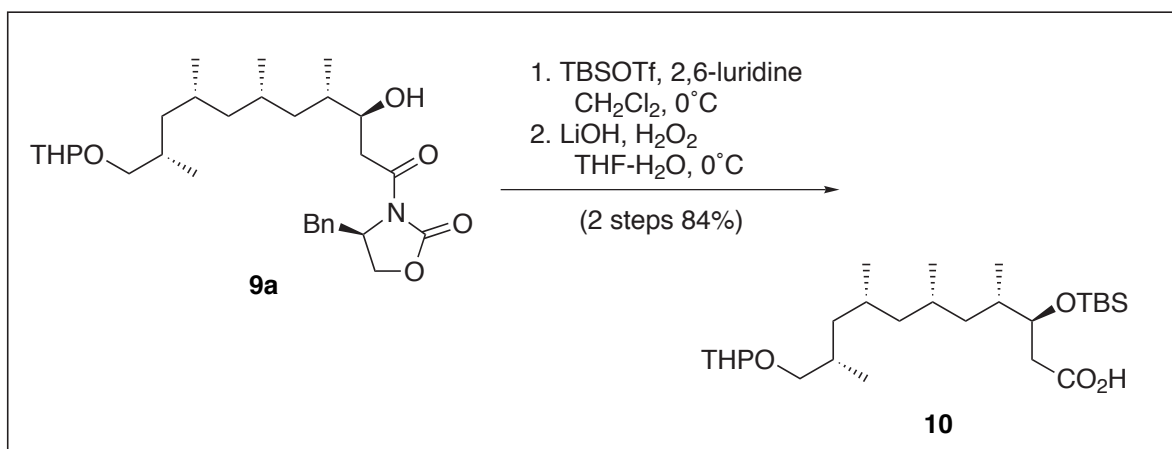

To a 0°C stirred solution of **9a** (453.0 mg, 0.876 mmol) in CH<sub>2</sub>Cl<sub>2</sub> (9 ml) was added 2,6-lutidine (170 µl, 1.49 mmol) followed by TBSOTf (260 µl, 1.14 mmol). After 30 min, the reaction was quenched with water and the aqueous phase was extracted with CH<sub>2</sub>Cl<sub>2</sub>. The combined organic extracts were dried over anhydrous Na<sub>2</sub>SO<sub>4</sub> and concentrated in vacuo. This residue was employed in the next reaction without further purification. The resulting silyl ether was dissolved in THF (6 ml) and H<sub>2</sub>O (2 ml) at 0°C. Lithium hydroxide (72.9 mg, 1.74 mmol) and hydrogen peroxide (30% solution in H<sub>2</sub>O, 590 µl, 5.21 mmol) were added to the solution. After 3 hr, the reaction was quenched with sat. aq. Na<sub>2</sub>S<sub>2</sub>O<sub>3</sub> solution, and the aqueous phase was extracted with EtOAc. The combined organic extracts were dried over anhydrous Na<sub>2</sub>SO<sub>4</sub> and concentrated in

vacuo. Flash chromatography (5:1 hexanes/EtOAc) afforded **10** (347.4 mg, 2 steps 84%) as a colorless oil.

$[\alpha]_D^{27} = -31.5^\circ$  ( $c = 0.24$ ,  $\text{CHCl}_3$ ); **IR** (**KBr**) 3444, 2955, 2927, 1789, 1456, 1385, 1350, 1250, 1031  $\text{cm}^{-1}$ ;  **$^1\text{H-NMR}$**  (**270 MHz**,  $\text{CDCl}_3$ )  $\delta$  0.02 (s, 3H,  $\text{CH}_3\text{Si}$ ), 0.05 (s, 3H,  $\text{CH}_3\text{Si}$ ), 0.78-0.92 (m, 23H,  $\text{CH}_3 \times 4$ ,  $\text{CH}_3\text{CSi}$  and  $1/2 \text{CH}_2 \times 2$ ), 0.95-0.92 (m, 3H,  $\text{CH}_2$  and  $1/2 \text{CH}_2$ ), 1.33-1.88 (m, 11H,  $1/2 \text{CH}_2$ ,  $\text{CH} \times 4$  and THP(6H)), 2.42 (d, 2H,  $J = 5.9 \text{ Hz}$ ,  $\text{C}_2\text{-H}$ ), 3.15 (m, 1H, THP(1H)), 3.50 (m, 2H, THP(1H) and  $1/2 \text{C}_{11}\text{-H}$ ), 3.85 (m, 1H,  $1/2 \text{C}_{11}\text{-H}$ ), 4.06 (m, 1H,  $\text{C}_3\text{-H}$ ), 4.57 (m, 1H, THP(1H));  **$^{13}\text{C-NMR}$**  (**67.5 MHz**,  $\text{CDCl}_3$ )  $\delta$  -4.7, -4.6, 15.2, 16.6, 16.7, 18.0, 19.4, 19.5, 20.6, 20.7, 20.8, 25.5, 25.8, 27.2, 27.3, 27.5, 30.6, 30.8, 30.9, 35.9, 39.3, 40.1, 40.4, 45.7, 61.9, 62.1, 72.5, 73.8, 74.0, 98.6, 99.0, 177.9; **HRMS** [**FAB**, **m-NBA**] calcd for  $\text{C}_{26}\text{H}_{52}\text{O}_5\text{SiNa}$  [ $\text{M}+\text{H}^+$ ]: 495.3481; found: 495.3489.

**(1R,2R)-1,2-Dihydroxymethylcyclopentane (11)**

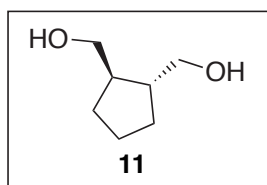

This diol was synthesized according to known protocol. [(a) Misumi, A.; Iwanaga, K.; Furuta, K.; Yamamoto, H. *J. Am. Chem. Soc.* **1985**, *107*, 3343-3345. (b) Fujimura, O.; de la Mata, F. J.; Grubbs, R. H. *Organometallics* **1996**, *15*, 1865-1871.]

**(1R,2R)-2-(4'-Methoxybenzyloxymethyl)cyclopentanecarbaldehyde (12)**

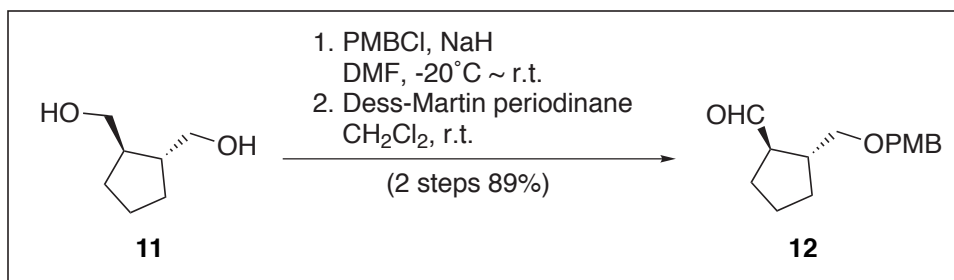

To a solution of **11** (55.0 mg, 0.42 mmol) in DMF (4.2 ml) was added sodium hydride (60% in oil, 20 mg, 0.47 mmol) at  $-20^\circ\text{C}$ . After being stirred for 30 min, the resulting suspension was added PMBCl (60  $\mu\text{L}$ , 0.50 mmol) and then warmed to r.t.. The reaction was quenched with

water, and the aqueous phase was extracted with EtOAc. The combined organic extracts were dried over anhydrous  $\text{Na}_2\text{SO}_4$  and concentrated in vacuo. Flash chromatography (7:1 hexanes/EtOAc) afforded the corresponding alcohol (111.4 mg) including unseparable impurities. To a solution of alcohol in  $\text{CH}_2\text{Cl}_2$  (4.5 ml) was added Dess-Martin periodinane (283 mg, 0.67 mmol). After being stirred at r.t. for 30 min, the reaction mixture was quenched with sat. aq.  $\text{Na}_2\text{S}_2\text{O}_3$  and sat. aq.  $\text{NaHCO}_3$ , the aqueous phase was extracted with  $\text{CH}_2\text{Cl}_2$ . The combined organic extracts were dried over anhydrous  $\text{Na}_2\text{SO}_4$  and concentrated in vacuo. Flash chromatography (20:1 hexanes/EtOAc) afforded **12** (94.5 mg, 2 steps 89%) as a colorless oil.

$[\alpha]_{\text{D}}^{21} = -25.9^\circ$  ( $c = 0.27$ ,  $\text{CHCl}_3$ ); **IR (KBr)** 2955, 2854, 1721, 1613, 1513, 1247, 1095, 1034  $\text{cm}^{-1}$ ;  **$^1\text{H}$ -NMR (270 MHz,  $\text{CDCl}_3$ )**  $\delta$  1.31 (m, 1H, 1/2  $\text{C}_3\text{-H}$ ), 1.57 (m, 2H,  $\text{C}_4\text{-H}$ ), 1.66-1.86 (m, 3H, 1/2  $\text{C}_3\text{-H}$  and  $\text{C}_5\text{-H}$ ), 2.33-2.51 (m, 2H,  $\text{C}_1\text{-H}$  and  $\text{C}_2\text{-H}$ ), 3.25 (dd, 1H,  $J = 8.9, 7.3$  Hz, 1/2  $\text{CH}_2\text{OPMB}$ ), 3.39 (dd, 1H,  $J = 8.9, 5.6$  Hz, 1/2  $\text{CH}_2\text{OPMB}$ ), 3.72 (s, 3H,  $\text{OCH}_3$ ), 4.36 (s, 2H,  $\text{CH}_2\text{Ph}$ ), 6.79 (d, 2H,  $J = 8.6$  Hz, ArH), 7.15 (d, 2H,  $J = 8.6$  Hz, ArH), 9.75 (d, 1H,  $J = 2.0$  Hz, CHO);  **$^{13}\text{C}$ -NMR (67.5 MHz,  $\text{CDCl}_3$ )**  $\delta$  24.9, 26.5, 29.3, 41.2, 55.2, 55.7, 72.6, 72.9, 113.7, 129.1, 130.4, 159.1, 203.7; **HRMS [EI]** calcd for  $\text{C}_{15}\text{H}_{20}\text{O}_3$  [ $\text{M}^+$ ]: 248.1412; found: 248.1407.

**(1S,1'R,2'R)-1-[2'-(4''-Methoxybenzyloxymethyl)cyclopentyl]buta-3-en-1-ol (**13**)**

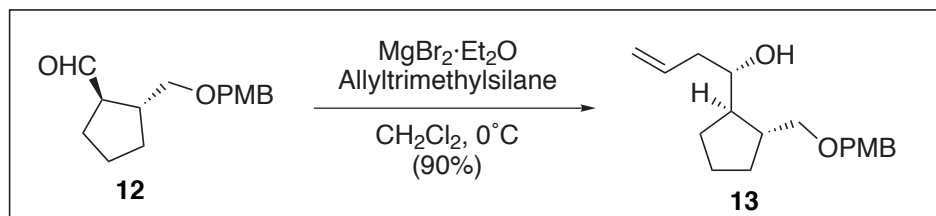

To a stirred solution of **12** (111.8 mg, 0.45 mmol) in  $\text{CH}_2\text{Cl}_2$  (4.5 ml) was added allyltrimethylsilane (110  $\mu\text{l}$ , 0.67 mmol) and magnesium bromide diethyl etherate (116.4 mg, 0.45 mmol) at  $0^\circ\text{C}$ . The reaction was stirred for 7 hr, then quenched with water. The aqueous phase was extracted with  $\text{CH}_2\text{Cl}_2$ . The combined organic extracts were dried over anhydrous  $\text{Na}_2\text{SO}_4$  and concentrated in vacuo. Flash chromatography (25:1 hexanes/EtOAc) afforded **13** (117.3 mg, 90%) along with its epimer (6.0 mg, 4.5%).

$[\alpha]_{\text{D}}^{21} = +6.1^\circ$  ( $c = 0.30$ ,  $\text{CHCl}_3$ ); **IR (KBr)** 3432, 2950, 2865, 1613, 1513, 1248, 1091, 1036  $\text{cm}^{-1}$ ;  **$^1\text{H}$ -NMR (270 MHz,  $\text{CDCl}_3$ )**  $\delta$  1.18-1.33 (m, 2H, 1/2  $\text{CH}_2 \times 2$ ), 1.47 (m, 1H, 1/2  $\text{CH}_2$ ), 1.51-1.63 (m, 2H, 1/2  $\text{CH}_2$  and  $\text{C}_1\text{-H}$ ), 1.72-1.84 (m, 2H, 1/2  $\text{CH}_2 \times 2$ ), 2.02-2.17 (m, 2H, 1/2  $\text{C}_2\text{-H}$

and C<sub>2</sub>-H), 2.39 (m, 1H, 1/2 C<sub>2</sub>-H), 3.20 (t, 1H, *J* = 8.9 Hz, 1/2 CH<sub>2</sub>OPMB), 3.41 (m, 1H, C<sub>1</sub>-H), 3.53 (dd, 1H, *J* = 8.9, 4.6 Hz, 1/2 CH<sub>2</sub>OPMB), 3.81 (s, 3H, OCH<sub>3</sub>), 4.47 (d, 1H, *J* = 11.9 Hz, 1/2 CH<sub>2</sub>Ph), 4.53 (d, 1H, *J* = 11.9 Hz, 1/2 CH<sub>2</sub>Ph), 5.10 (m, 2H, C<sub>4</sub>-H), 5.98 (m, 1H, C<sub>3</sub>-H), 6.89 (d, 2H, *J* = 8.6 Hz, ArH), 7.26 (d, 2H, *J* = 8.6 Hz, ArH); <sup>13</sup>C-NMR (67.5 MHz, CDCl<sub>3</sub>) δ 24.5, 29.9, 30.9, 40.4, 43.9, 51.6, 55.2, 72.8, 74.2, 74.9, 113.8, 116.4, 129.4, 129.6, 135.7, 159.2; HRMS [EI] calcd for C<sub>18</sub>H<sub>26</sub>O<sub>3</sub> [M<sup>+</sup>]: 290.1882; found: 290.1887.

Stereochemical assignment of the newly created asymmetric center was achieved by Mosher's method.

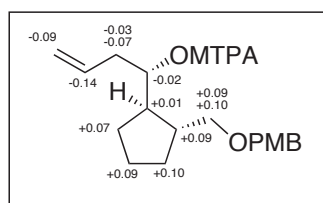

$$\Delta\delta = (\delta_S - \delta_R) \text{ for } (R)\text{- and } (S)\text{-MTPA ester of } \mathbf{13}$$

**(1'R,2'R,4S)-4-(*tert*-Butyldimethylsilyloxy)-4-[2'-(4''-methoxybenzyloxymethyl)-cyclopentyl]butene (13a)**

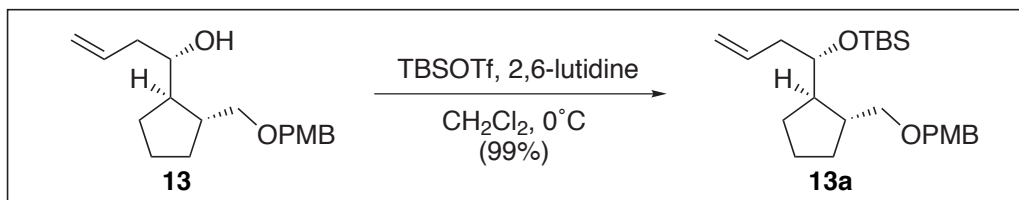

To a solution of **13** (1.91 g, 6.61 mmol) in CH<sub>2</sub>Cl<sub>2</sub> (66 ml) at 0°C was added 2,6-lutidine (1.1 ml, 9.92 mmol) followed by TBSOTf (2.0 ml, 8.59 mmol). After 1 hr, the reaction was quenched with water, and the aqueous phase was extracted with CH<sub>2</sub>Cl<sub>2</sub>. The combined organic extracts were dried over anhydrous Na<sub>2</sub>SO<sub>4</sub> and concentrated in vacuo. Flash chromatography (50:1 hexanes/EtOAc) afforded **13a** (2.65 g, 99%) as a colorless oil.

[α]<sub>D</sub><sup>22</sup> = -8.6° (*c* = 0.27, CHCl<sub>3</sub>); IR (KBr) 2953, 2856, 1471, 1249, 1095 cm<sup>-1</sup>; <sup>1</sup>H-NMR (270 MHz, CDCl<sub>3</sub>) δ 0.06 (s, 6H, CH<sub>3</sub>Si), 0.90 (s, 9H, CH<sub>3</sub>CSi), 1.23-1.36 (m, 2H, 1/2 C<sub>3</sub>-H and 1/2 C<sub>5</sub>-H), 1.44-1.74 (m, 5H, C<sub>1</sub>-H, 1/2 C<sub>3</sub>-H, C<sub>4</sub>-H and 1/2 C<sub>5</sub>-H), 2.15 (m, 1H, C<sub>2</sub>-H), 2.26 (m, 2H, C<sub>3</sub>-H), 3.18 (t, 1H, *J* = 8.6 Hz, 1/2 CH<sub>2</sub>OPMB), 3.46 (dd, 1H, *J* = 8.6, 4.9 Hz, 1/2 CH<sub>2</sub>OPMB), 3.64 (m, 1H, C<sub>4</sub>-H), 3.80 (s, 3H, OCH<sub>3</sub>), 4.40 (d, 2H, *J* = 11.5 Hz, 1/2 CH<sub>2</sub>Ph), 4.46

(d, 2H,  $J = 11.5$  Hz,  $1/2$   $\text{CH}_2\text{Ph}$ ), 5.01 (m, 2H,  $\text{C}_1\text{-H}$ ), 5.85 (m, 1H,  $\text{C}_2\text{-H}$ ), 6.88 (d, 2H,  $J = 8.2$  Hz, ArH), 7.27 (d, 2H,  $J = 8.2$  Hz, ArH);  $^{13}\text{C-NMR}$  (67.5 MHz,  $\text{CDCl}_3$ )  $\delta$  -4.6, -4.2, 18.0, 25.5, 25.9, 29.5, 30.5, 39.8, 41.0, 46.8, 55.2, 72.6, 74.7, 75.5, 113.7, 116.5, 129.1, 130.9, 135.2, 150.0; HRMS [FAB, m-NBA] calcd for  $\text{C}_{24}\text{H}_{39}\text{O}_3\text{Si}$  [ $\text{M-H}^+$ ]: 403.2668; found: 403.2669.

**(1'R,2'R,3S)-3-(*tert*-Butyldimethylsilyloxy)-3-[2'-(4''-methoxybenzyloxymethyl)-cyclopentyl]propanal (13b)**

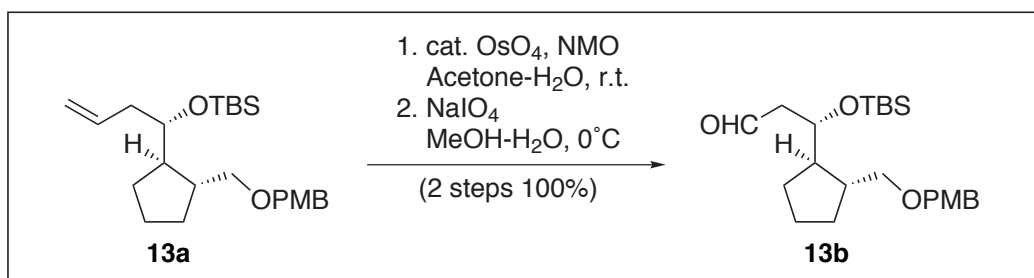

To a solution of **13a** (515.8 mg, 1.27 mmol) in acetone (12 ml) and  $\text{H}_2\text{O}$  (12 ml) were added osmium tetroxide (32.4 mg, 0.127 mmol) and NMO (600 mg, 5.10 mmol), and the reaction was stirred at r.t. for 4 hr. The reaction mixture was quenched with sat. aq.  $\text{Na}_2\text{S}_2\text{O}_3$  solution and the aqueous phase was extracted with EtOAc. The combined organic extracts were dried over anhydrous  $\text{Na}_2\text{SO}_4$  and concentrated in vacuo to give the corresponding diol as a yellow oil.

The crude diol was dissolved in MeOH (18 ml) and  $\text{H}_2\text{O}$  (6 ml). To the reaction mixture was added sodium metaperiodate (545 mg, 2.55 mmol) at  $0^\circ\text{C}$ . The mixture was stirred for 2 hr, then quenched with sat. aq.  $\text{Na}_2\text{S}_2\text{O}_3$  solution. The aqueous phase was extracted with EtOAc. The combined organic extracts were dried over anhydrous  $\text{Na}_2\text{SO}_4$  and concentrated in vacuo. Flash chromatography (40:1 hexanes/EtOAc) afforded **13b** (532.7 mg, 2 steps 100%) as a colorless oil.

$[\alpha]_{\text{D}}^{22} = -14.4^\circ$  ( $c = 0.36$ ,  $\text{CHCl}_3$ ); IR (KBr) 2954, 2857, 1725, 1614, 1513, 1249, 1093, 1037  $\text{cm}^{-1}$ ;  $^1\text{H-NMR}$  (270 MHz,  $\text{CDCl}_3$ )  $\delta$  0.03 (s, 3H,  $\text{CH}_3\text{Si}$ ), 0.06 (s, 3H,  $\text{CH}_3\text{Si}$ ), 0.86 (s, 9H,  $\text{CH}_3\text{CSi}$ ), 1.32-1.75 (m, 6H,  $\text{C}_3\text{-H}$ ,  $\text{C}_4\text{-H}$  and  $\text{C}_5\text{-H}$ ), 1.83 (m, 1H,  $\text{C}_1\text{-H}$ ), 2.04 (m, 1H,  $\text{C}_2\text{-H}$ ), 2.48 (ddd, 1H,  $J = 15.8, 5.9, 2.6$  Hz,  $1/2$   $\text{C}_2\text{-H}$ ), 2.58 (ddd, 1H,  $J = 15.8, 4.9, 1.7$  Hz,  $1/2$   $\text{C}_2\text{-H}$ ), 3.31 (m, 2H,  $\text{CH}_2\text{OPMB}$ ), 3.80 (s, 3H,  $\text{OCH}_3$ ), 4.20 (m, 1H,  $\text{C}_3\text{-H}$ ), 4.41 (m, 2H,  $\text{CH}_2\text{Ph}$ ), 6.87 (d, 2H,  $J = 8.6$  Hz, ArH), 7.24 (d, 2H, ArH), 9.73 (m, 1H, CHO);  $^{13}\text{C-NMR}$  (67.5 MHz,  $\text{CDCl}_3$ )  $\delta$  -4.6, 17.9, 25.2, 25.8, 28.0, 30.3, 41.0, 48.6, 48.7, 55.2, 70.9, 72.8, 74.5, 113.7, 129.2, 130.6, 159.1, 202.5; HRMS [FAB, m-NBA] calcd for  $\text{C}_{23}\text{H}_{37}\text{O}_4\text{Si}$  [ $\text{M-H}^+$ ]: 405.2461; found: 405.2451.

**(1'R,2'R,5S)-5-(*tert*-Butyldimethylsilyloxy)-5-[2'-(4''-methoxybenzyloxymethyl)-cyclopentyl]penta-2*E*-enal (**14**)**

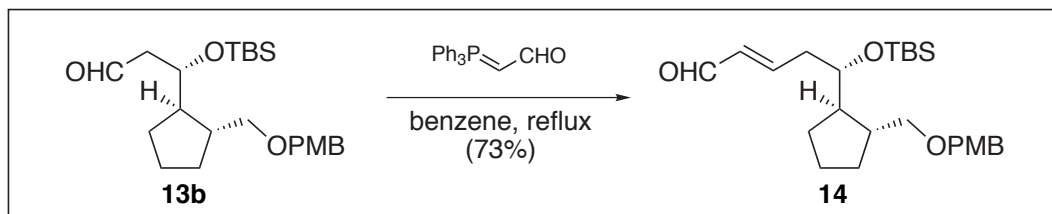

To a solution of **13b** (20.0 mg, 49.2  $\mu\text{mol}$ ) in benzene (1.0 ml) was added triphenylphosphoranylidene acetaldehyde (45.0 mg, 98.5  $\mu\text{mol}$ ), and the resulting solution was stirred at 80°C for 2 days. The solvent was then removed in vacuo and the residue was purified by flash chromatography (30:1 hexanes/EtOAc) to afford **14** (15.5 mg, 73%) as a yellow oil.

$[\alpha]_{\text{D}}^{23} = +8.3^{\circ}$  ( $c = 0.35$ ,  $\text{CHCl}_3$ ); **IR** (**KBr**) 2953, 2857, 1694, 1513, 1249, 1091, 1038  $\text{cm}^{-1}$ ;  **$^1\text{H}$ -NMR** (270 MHz,  $\text{CDCl}_3$ )  $\delta$  0.04 (s, 3H,  $\text{CH}_3\text{Si}$ ), 0.06 (s, 3H,  $\text{CH}_3\text{Si}$ ), 0.88 (s, 9H,  $\text{CH}_3\text{CSi}$ ), 1.28-1.71 (m, 7H,  $\text{C}_3\text{-H}$ ,  $\text{C}_4\text{-H}$ ,  $\text{C}_5\text{-H}$  and  $\text{C}_1\text{-H}$ ), 2.08 (m, 1H,  $\text{C}_2\text{-H}$ ), 2.49 (m, 2H,  $\text{C}_4\text{-H}$ ), 3.22 (t, 1H,  $J = 8.6$  Hz, 1/2  $\text{CH}_2\text{OPMB}$ ), 3.39 (dd, 1H,  $J = 8.6$  Hz, 1/2  $\text{CH}_2\text{OPMB}$ ), 3.78 (m, 1H,  $\text{C}_5\text{-H}$ ), 3.80 (s, 3H,  $\text{OCH}_3$ ), 4.39 (d, 1H,  $J = 11.9$  Hz, 1/2  $\text{CH}_2\text{Ph}$ ), 4.43 (d, 1H,  $J = 11.9$  Hz, 1/2  $\text{CH}_2\text{Ph}$ ), 6.10 (dd, 1H,  $J = 15.5, 7.9$  Hz,  $\text{C}_2\text{-H}$ ), 6.86 (d, 2H,  $J = 8.2$  Hz,  $\text{ArH}$ ), 6.88 (m, 1H,  $\text{C}_3\text{-H}$ ), 7.24 (d, 2H,  $J = 8.2$  Hz,  $\text{ArH}$ ), 9.47 (d, 1H,  $J = 7.9$  Hz,  $\text{CHO}$ );  **$^{13}\text{C}$ -NMR** (67.5 MHz,  $\text{CDCl}_3$ )  $\delta$  -4.6, -4.3, 18.0, 25.2, 25.8, 29.2, 30.3, 38.4, 41.4, 47.7, 55.2, 72.7, 74.5, 74.6, 113.7, 129.2, 130.7, 134.7, 155.2, 159.1, 193.9; **HRMS** [**EI**] calcd for  $\text{C}_{25}\text{H}_{40}\text{O}_4\text{Si}$  [ $\text{M}^+$ ]: 432.2696; found: 432.2702.

**(1'R,2'R,7S)-2-Bromo-7-(*tert*-butyldimethylsilyloxy)-7-[2'-(4''-methoxybenzyloxymethyl)cyclopentyl]hepta-2*E*,4*Z*-dienenitrile (**14a**)**

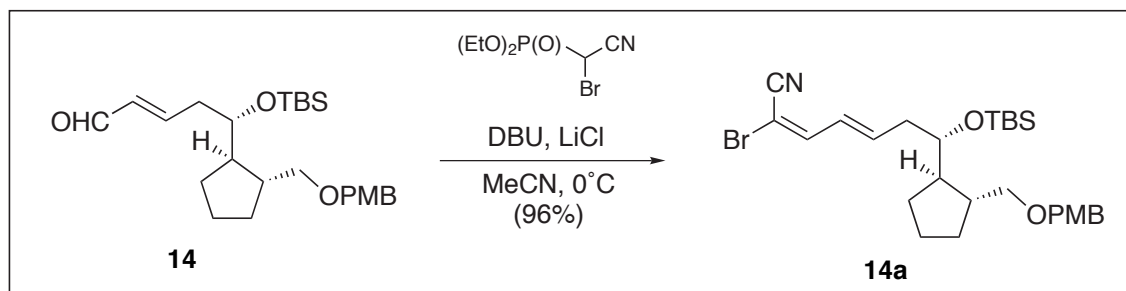

To a solution of **14** (39.8 mg, 92.1  $\mu\text{mol}$ ) and diethyl bromo(cyano)methylphosphate (47.0 mg, 184  $\mu\text{mol}$ ) in MeCN (1 ml) at 0°C were added DBU (20  $\mu\text{l}$ , 138  $\mu\text{mol}$ ) and lithium chloride (6.0



mg, 138  $\mu$ mol). The solution was stirred for 2 hr, then quenched with sat. aq.  $\text{NaHCO}_3$  solution. The aqueous phase was extracted with EtOAc. The combined organic extracts were dried over anhydrous  $\text{Na}_2\text{SO}_4$  and concentrated in vacuo. Flash chromatography (60:1 hexanes/EtOAc) afforded **14a** (47.3 mg, 96%) as a colorless oil.

$[\alpha]_D^{22} = +31.0^\circ$  ( $c = 0.47$ ,  $\text{CHCl}_3$ ); **IR (KBr)** 2952, 2856, 2217, 1614, 1513, 1248, 1078  $\text{cm}^{-1}$ ;  **$^1\text{H}$ -NMR (270 MHz,  $\text{CDCl}_3$ )**  $\delta$  0.03 (s, 3H,  $\text{CH}_3\text{Si}$ ), 0.05 (s, 3H,  $\text{CH}_3\text{Si}$ ), 0.88 (s, 9H,  $\text{CH}_3\text{CSi}$ ), 1.25-1.71 (m, 7H,  $\text{C}_3\text{-H}$ ,  $\text{C}_4\text{-H}$ ,  $\text{C}_5\text{-H}$  and  $\text{C}_1\text{-H}$ ), 2.07 (m, 1H,  $\text{C}_2\text{-H}$ ), 2.36 (m, 2H,  $\text{C}_6\text{-H}$ ), 3.20 (t, 1H,  $J = 8.6$  Hz,  $1/2 \text{CH}_2\text{OPMB}$ ), 3.39 (dd, 1H,  $J = 8.6, 5.6$  Hz,  $1/2 \text{CH}_2\text{OPMB}$ ), 3.69 (m, 1H,  $\text{C}_7\text{-H}$ ), 3.80 (s, 3H,  $\text{OCH}_3$ ), 4.39 (d, 1H,  $J = 11.9$  Hz,  $1/2 \text{CH}_2\text{Ph}$ ), 4.44 (d, 1H,  $J = 11.9$  Hz,  $1/2 \text{CH}_2\text{Ph}$ ), 6.25 (m, 1H,  $\text{C}_5\text{-H}$ ), 6.36 (dd, 1H,  $J = 15.2, 10.6$  Hz,  $\text{C}_4\text{-H}$ ), 6.87 (d, 2H,  $J = 8.6$  Hz, ArH), 7.10 (d, 1H,  $J = 10.6$  Hz,  $\text{C}_3\text{-H}$ ), 7.24 (d, 2H,  $J = 8.6$  Hz, ArH);  **$^{13}\text{C}$ -NMR (67.5 MHz,  $\text{CDCl}_3$ )**  $\delta$  -4.6, -4.3, 17.9, 25.2, 25.8, 29.3, 30.3, 38.8, 41.3, 47.4, 55.1, 72.6, 74.5, 74.7, 84.1, 113.6, 114.6, 127.6, 129.1, 130.7, 143.5, 149.7, 159.0; **HRMS [FAB, m-NBA]** calcd for  $\text{C}_{27}\text{H}_{40}\text{O}_3\text{NBrSiNa}$  [ $\text{M}+\text{Na}^+$ ]: 556.1858; found: 556.1855.

diethyl bromo(cyano)methylphosphate  $[(\text{EtO})_2\text{P}(\text{O})\text{CH}(\text{Br})\text{CN}]$  was prepared according to known protocol. (Iorga, B.; Ricard, L.; Savignac, P. *J. Chem. Soc., Perkin Trans. 1*, **2000**, 3311.)

**(1'R,2'R,7S)-2-Bromo-7-[2'-(4''-methoxybenzyloxymethyl)-cyclopentyl]-7-hydroxyhept-2Z,4E-dienitrile (15)**

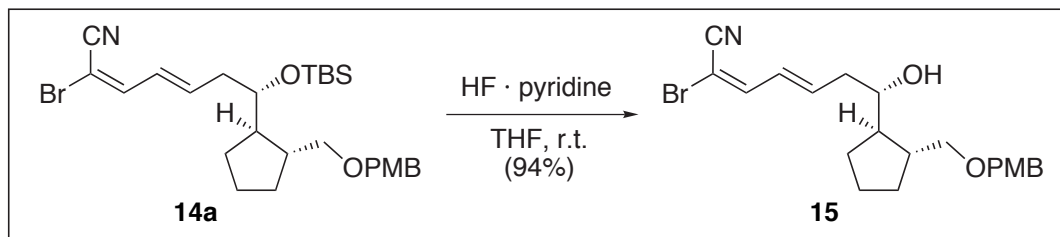

**14a** (184.0 mg, 345  $\mu$ mol) was placed in a solution of  $\text{HF}\cdot\text{pyridine}$  (500  $\mu$ l) in THF (500  $\mu$ l) and pyridine (500  $\mu$ l) and stirred at r.t. for 2 days. The resulting solution was filtered through a short plug of silica gel and concentrated in vacuo. The residue was purified by flash chromatography (7:1 hexanes/EtOAc) to afford **15** (135.2 mg, 94%).

$[\alpha]_D^{24} = +11.3^\circ$  ( $c = 0.25$ ,  $\text{CHCl}_3$ ); **IR (KBr)** 3406, 2949, 2222, 2216, 1613, 1513, 1248, 1075, 1035  $\text{cm}^{-1}$ ;  **$^1\text{H}$ -NMR (270 MHz,  $\text{CDCl}_3$ )**  $\delta$  1.25 (m, 1H,  $1/2 \text{CH}_2$ ), 1.41-1.67 (m, 5H,  $1/2 \text{CH}_2 \times 2$ ,  $\text{C}_1\text{-H}$  and  $\text{C}_4\text{-H}$ ), 1.77 (m, 1H,  $1/2 \text{CH}_2$ ), 2.04 (m, 1H,  $\text{C}_2\text{-H}$ ), 2.24 (m, 1H,  $1/2 \text{C}_6\text{-H}$ ), 2.47 (m,

1H, 1/2 C<sub>6</sub>-H), 3.14 (dd, 1H, *J* = 10.6, 8.6 Hz, 1/2 CH<sub>2</sub>OPMB), 3.41 (m, 1H, C<sub>7</sub>-H), 3.56 (dd, 1H, *J* = 8.6, 4.0 Hz, 1/2 CH<sub>2</sub>OPMB), 3.81 (s, 3H, OCH<sub>3</sub>), 4.49 (m, 2H, CH<sub>2</sub>Ph), 6.33-6.48 (m, 2H, C<sub>4</sub>-H and C<sub>5</sub>-H), 6.88 (d, 2H, *J* = 8.6 Hz, ArH), 7.15 (m, 1H, C<sub>3</sub>-H), 7.24 (d, 2H, *J* = 8.6 Hz, ArH); <sup>13</sup>C-NMR (67.5 MHz, CDCl<sub>3</sub>) δ 24.3, 29.6, 30.9, 39.6, 44.0, 52.2, 55.1, 72.8, 74.0, 74.5, 83.8, 113.7, 114.6, 127.1, 129.1, 129.4, 144.3, 150.0, 159.2; HRMS [FAB, m-NBA] calcd for C<sub>21</sub>H<sub>26</sub>O<sub>3</sub>NBrNa [M+Na<sup>+</sup>]: 442.0994; found: 442.1002.

**(1''S,1'''R,2'''R,3S,4S,6S,8R,10S)-3-(tert-Butyldimethyl-silyloxy)-4,6,8,10-tetramethyl-11-(tetrahydropyran-2'-yloxy)undecanoic acid 6''-bromo-6''-cyano-1-[2'''-(4'''-methoxybenzyloxymethyl)cyclopentyl]hexa-3''E,5''E-dienyl ester (15a)**

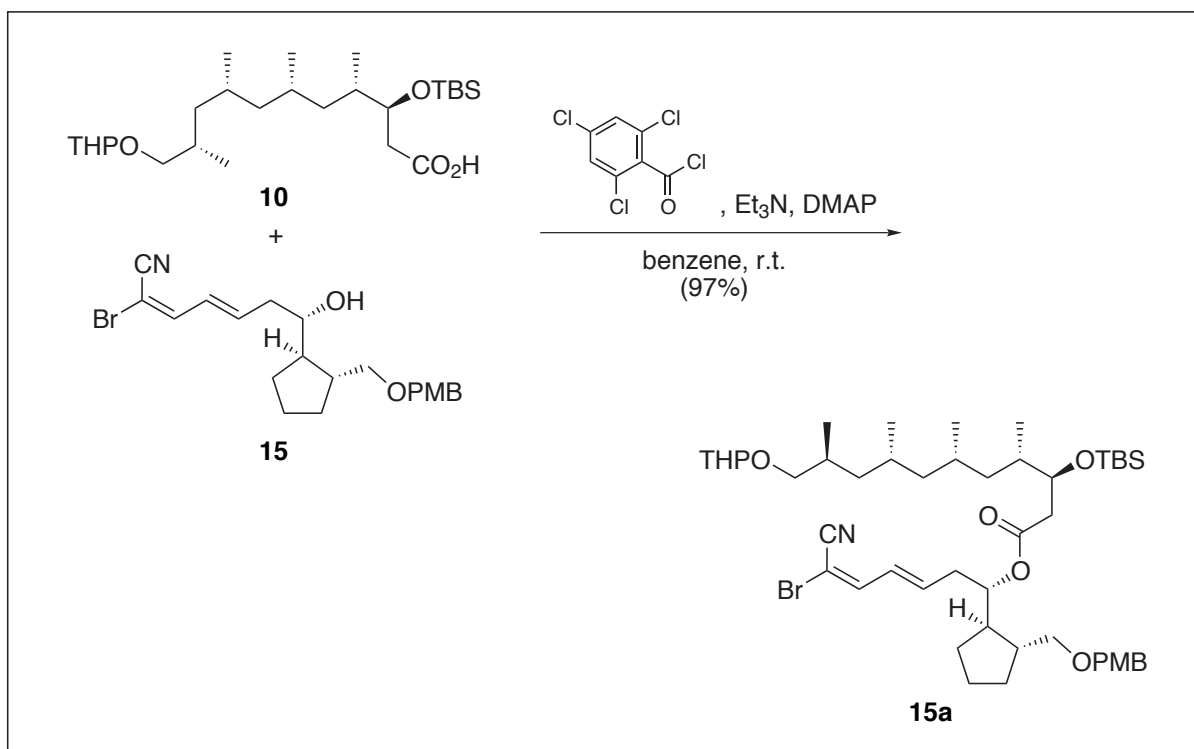

To a stirred solution of **10** (113.0 mg, 0.239 mmol) in benzene (2.4 ml) was added triethylamine (67 µl, 0.479 mmol) followed by 2,4,6-trichlorobenzoyl chloride (41 µl, 0.263 mmol) at r.t.. The resulting solution was stirred for 1 hr, then treated with a solution of **15** (130.4 mg, 0.311 mmol) in benzene (1.4 ml) and DMAP (38.0 mg, 0.311 mmol) in benzene (1.0 ml), and stirred for additional 30 min. The reaction was quenched with sat. aq. NaHCO<sub>3</sub> solution and the aqueous phase was extracted with EtOAc. The combined organic extracts were dried over anhydrous



dried over anhydrous  $\text{Na}_2\text{SO}_4$  and concentrated in vacuo. Flash chromatography (7:1 hexanes/EtOAc) afforded **15b** (164.3 mg, 93%) as a colorless oil.

$[\alpha]_{\text{D}}^{25} = -10.2^\circ$  ( $c = 0.31$ ,  $\text{CHCl}_3$ ); **IR** (**KBr**) 3500, 2956, 2927, 1733, 1250, 1172, 1084, 1036  $\text{cm}^{-1}$ ;  **$^1\text{H-NMR}$**  (**270 MHz**,  $\text{CDCl}_3$ )  $\delta$  0.03 (s, 3H,  $\text{CH}_3\text{Si}$ ), 0.07 (s, 3H,  $\text{CH}_3\text{Si}$ ), 0.80-0.91 (m, 24H,  $\text{CH}_3 \times 4$ ,  $1/2 \text{CH}_2 \times 3$  and  $\text{CH}_3\text{CSi}$ ), 0.94-1.41 (m, 4H,  $1/2 \text{CH}_2 \times 4$ ), 1.45-1.81 (m, 9H,  $\text{CH}_2 \times 2$ ,  $\text{CH} \times 4$  and  $1/2 \text{CH}_2$ ), 1.88 (m, 1H,  $\text{CH}$ ), 2.06 (m, 1H,  $\text{CH}$ ), 2.31-2.60 (m, 4H,  $\text{C}_2\text{-H}$  and  $\text{C}_2\text{'-H}$ ), 3.24-3.47 (m, 4H,  $\text{C}_{11}\text{-H}$  and  $\text{CH}_2\text{OPMB}$ ), 3.80 (s, 3H,  $\text{OCH}_3$ ), 4.06 (m, 1H,  $\text{C}_3\text{-H}$ ), 4.37 (d, 1H,  $J = 11.9 \text{ Hz}$ ,  $1/2 \text{CH}_2\text{Ph}$ ), 4.41 (d, 1H,  $J = 11.9 \text{ Hz}$ ,  $1/2 \text{CH}_2\text{Ph}$ ), 4.93 (m, 1H,  $\text{C}_1\text{'-H}$ ), 6.10 (m, 1H,  $\text{C}_3\text{'-H}$ ), 6.36 (dd, 1H,  $J = 14.8, 11.2 \text{ Hz}$ ,  $\text{C}_4\text{'-H}$ ), 6.87 (d, 2H,  $J = 8.6 \text{ Hz}$ ,  $\text{ArH}$ ), 7.06 (d, 1H,  $J = 11.2 \text{ Hz}$ ,  $\text{C}_5\text{'-H}$ ), 7.24 (d, 2H,  $J = 8.6 \text{ Hz}$ ,  $\text{ArH}$ );  **$^{13}\text{C-NMR}$**  (**67.5 MHz**,  $\text{CDCl}_3$ )  $\delta$  -4.7, -4.4, 14.4, 15.9, 18.0, 20.5, 20.6, 25.0, 25.8, 27.0, 27.2, 29.6, 30.1, 33.1, 35.4, 36.5, 39.5, 39.6, 41.0, 41.5, 45.1, 45.7, 55.1, 69.1, 71.7, 72.7, 73.9, 75.7, 85.0, 113.7, 114.4, 128.0, 129.0, 130.5, 141.5, 149.3, 159.0, 171.6; **HRMS** [**FAB**, **m-NBA**] calcd for  $\text{C}_{42}\text{H}_{68}\text{O}_6\text{NBrSiNa}$  [ $\text{M}+\text{Na}^+$ ]: 812.3897; found: 812.3936.

**(1'S,1''R,2''R,3S,4S,6S,8R,10S)-3-(tert-Butyldimethylsilyloxy)-4,6,8,10-tetramethy-11-oxoundecanoic acid 6'-bromo-6'-cyano-1'-[2''-(4'''-methoxybenzyloxymethyl)-cyclopentyl]hexa-3'E,5'Z-dienyl ester (2)**

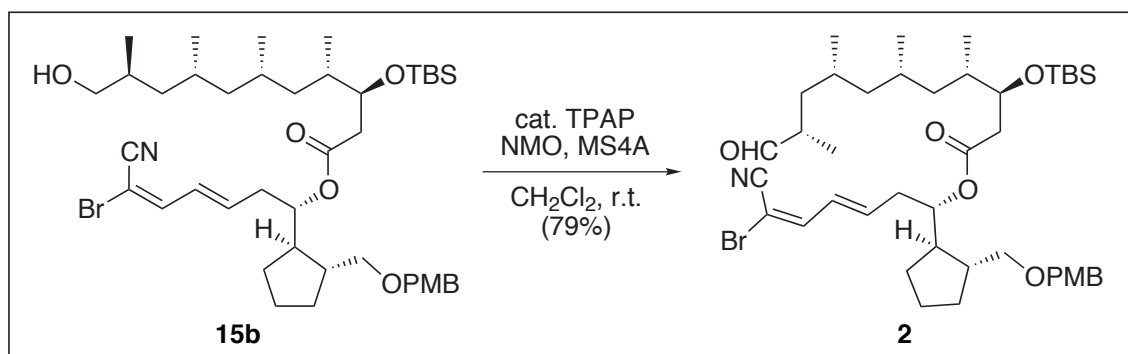

To a solution of **15b** (153.2 mg, 0.194 mmol) in  $\text{CH}_2\text{Cl}_2$  (4.0 ml) were added dried MS4A (1 g), TPAP (3.4 mg, 9.70  $\mu\text{mol}$ ) and NMO (45.6 mg, 0.388 mmol) at r.t.. The resulting solution was stirred for 30 min and filtered through a silica pad. After evaporation of the filtrate, the residue was purified by flash chromatography (15:1 hexanes/EtOAc) to afford **2** (120.3 mg, 79%) as a colorless oil.

$[\alpha]_{\text{D}}^{25} = -3.7^\circ$  ( $c = 0.19$ ,  $\text{CHCl}_3$ ); **IR** (**KBr**) 2955, 2929, 2856, 1731, 1513, 1462, 1249, 1084,

cm<sup>-1</sup>; <sup>1</sup>H-NMR (270 MHz, CDCl<sub>3</sub>) δ 0.03 (s, 3H, CH<sub>3</sub>Si), 0.07 (s, 3H, CH<sub>3</sub>Si), 0.80-0.91 (m, 21H, CH<sub>3</sub> x 3, 1/2 CH<sub>2</sub> x 3 and CH<sub>3</sub>CSi), 0.93-1.10 (m, 2H, 1/2 CH<sub>2</sub> x 2), 1.07 (d, 3H, *J* = 6.9 Hz, C<sub>10</sub>-CH<sub>3</sub>), 1.18-1.43 (m, 2H, 1/2 CH<sub>2</sub> x 2), 1.47-1.76 (m, 9H, CH<sub>2</sub> x 2, CH x 4 and 1/2 CH<sub>2</sub>), 1.86 (m, 1H, CH), 2.05 (m, 1H, CH), 2.30-2.59 (m, 4H, C<sub>2</sub>-H and CH<sub>2</sub>OPMB), 3.23-3.38 (m, 2H, C<sub>2'</sub>-H), 3.80 (s, 3H, OCH<sub>3</sub>), 4.05 (m, 1H, C<sub>3</sub>-H), 4.40 (d, 1H, *J* = 11.9 Hz, 1/2 CH<sub>2</sub>Ph), 4.44 (d, 1H, *J* = 11.9 Hz, 1/2 CH<sub>2</sub>Ph), 4.96 (m, 1H, C<sub>1</sub>-H), 6.10 (m, 1H, C<sub>3</sub>-H), 6.36 (dd, 1H, *J* = 15.2, 11.2 Hz, C<sub>4</sub>-H), 6.87 (d, 2H, *J* = 8.6 Hz, ArH), 7.07 (d, 1H, *J* = 11.2 Hz, C<sub>5</sub>-H), 7.24 (d, 2H, *J* = 8.6 Hz, ArH), 9.61 (d, 1H, *J* = 1.6 Hz, CHO); <sup>13</sup>C-NMR (67.5 MHz, CDCl<sub>3</sub>) δ -4.7, -4.4, 13.0, 14.6, 18.0, 20.4, 20.5, 25.0, 25.8, 27.3, 27.4, 29.7, 30.2, 35.4, 36.3, 36.5, 39.5, 40.7, 41.5, 44.1, 45.1, 45.2, 55.2, 71.5, 72.7, 74.0, 75.6, 85.1, 113.6, 114.4, 128.1, 129.0, 130.5, 141.5, 149.3, 159.0, 171.6, 205.1; HRMS [FAB, m-NBA] calcd for C<sub>42</sub>H<sub>66</sub>O<sub>6</sub>NBrSiNa [M+Na<sup>+</sup>]: 810.3740; found: 810.3770.

**(1'*R*,2*S*,2'*R*,8*R*,9*S*,11*R*,13*S*,15*S*,16*S*)-16-(*tert*-Butyldimethyl-silyloxy)-8-hydroxy-2-[2'-(4''-methoxybenzyloxymethyl)cyclopentyl]-9,11,13,15-tetramethyl-18-oxo-oxaoctadeca-4*E*,6*Z*-diene-7-carbonitrile (19) (Intramolecular Reformatsky reaction)**

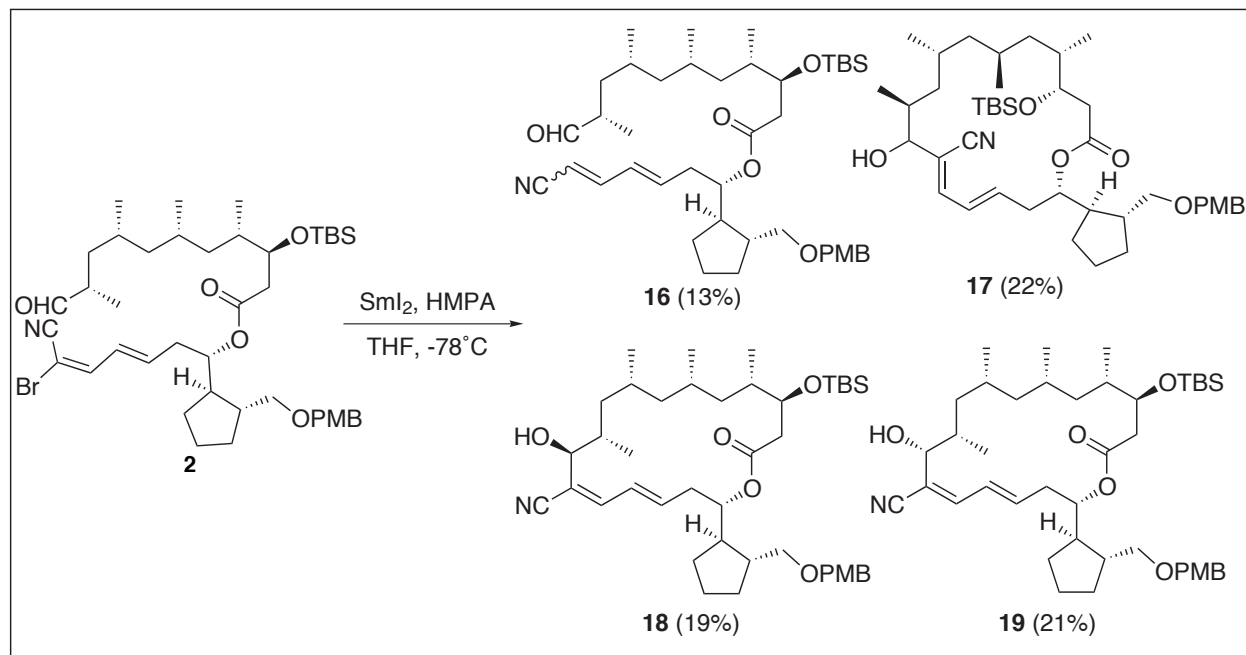

To a solution of SmI<sub>2</sub> (0.1 M solution in THF, 20 ml, 2.00 mmol) was added HMPA (240 µl, 1.37 mmol) at r.t. The resulting solution was cooled to -78°C, and **2** (54.2 mg, 68.9 µmol) was added

dropwise over 30 min. To the reaction was added hexane (20 ml) and silica gel (20 g), and the resulting mixture was stirred at r.t. for 20 min. The mixture was filtered through a short plug of silica gel and concentrated in vacuo. The residue was purified by flash chromatography (10:1 to 5:1 hexanes/EtOAc) to afford **16** (6.1 mg, 13%), **17** (10.5 mg, 22%), **18** (9.2 mg, 19%), and desired **19** (10.2 mg, 21%).

**19** :  $[\alpha]_D^{24} = -19.0^\circ$  ( $c = 0.54$ ,  $\text{CHCl}_3$ ); **IR (KBr)** 3470, 2956, 2926, 2853, 1737, 1513, 1463, 1249, 1079, 1036  $\text{cm}^{-1}$ ;  **$^1\text{H-NMR}$  (270 MHz,  $\text{CDCl}_3$ )**  $\delta$  0.10 (s, 3H,  $\text{CH}_3\text{Si}$ ), 0.11 (s, 3H,  $\text{CH}_3\text{Si}$ ), 0.79 (d, 3H,  $J = 6.9$  Hz,  $\text{CH}_3$ ), 0.81 (d, 3H,  $J = 5.9$  Hz,  $\text{CH}_3$ ), 0.86 (m, 3H,  $\text{CH}_3$ ), 0.89 (s, 9H,  $\text{CH}_3\text{CSi}$ ), 1.03 (d, 3H,  $J = 6.6$  Hz,  $\text{CH}_3$ ), 0.76-1.41 (m, 9H,  $\text{CH}_2 \times 4$  and  $1/2 \text{CH}_2$ ), 1.52-2.20 (m, 7H,  $1/2 \text{CH}_2$ ,  $\text{CH}_2$  and  $\text{CH} \times 4$ ), 2.26-2.25 (m, 6H,  $\text{CH}_2 \times 2$  and  $\text{CH} \times 2$ ), 3.17 (dd, 1H,  $J = 8.9, 7.6$  Hz,  $1/2 \text{CH}_2\text{OPMB}$ ), 3.34 (dd, 1H,  $J = 8.9, 4.9$  Hz,  $1/2 \text{CH}_2\text{OPMB}$ ), 3.80 (s, 3H,  $\text{OCH}_3$ ), 4.04 (m, 1H,  $\text{C}_{16}\text{-H}$ ), 4.08 (d, 1H,  $J = 9.9$  Hz,  $\text{C}_8\text{-H}$ ), 4.38 (d, 1H,  $J = 11.9$  Hz,  $1/2 \text{CH}_2\text{Ph}$ ), 4.43 (d, 1H,  $J = 11.9$  Hz,  $1/2 \text{CH}_2\text{Ph}$ ), 5.02 (m, 1H,  $\text{C}_2\text{-H}$ ), 6.17 (m, 1H,  $\text{C}_4\text{-H}$ ), 6.30 (dd, 1H,  $J = 14.8, 10.9$  Hz,  $\text{C}_5\text{-H}$ ), 6.82 (d, 1H,  $J = 10.9$  Hz,  $\text{C}_6\text{-H}$ ), 6.87 (d, 2H,  $J = 8.6$  Hz,  $\text{ArH}$ ), 7.24 (d, 2H,  $J = 8.6$  Hz,  $\text{ArH}$ );  **$^{13}\text{C-NMR}$  (67.5 MHz,  $\text{CDCl}_3$ )**  $\delta$  -5.4, -4.4, 14.9, 17.9, 18.6, 19.8, 20.7, 25.0, 25.9, 26.1, 26.2, 30.0, 30.3, 35.3, 35.6, 36.2, 36.4, 37.6, 42.7, 43.4, 43.6, 48.1, 55.3, 72.6, 72.9, 73.8, 74.0, 75.2, 77.2, 113.8, 115.5, 126.9, 128.9, 130.7, 139.7, 144.2, 159.1, 171.5; **HRMS [FAB, m-NBA]** calcd for  $\text{C}_{42}\text{H}_{67}\text{O}_6\text{NSiNa}$  [ $\text{M}+\text{Na}^+$ ]: 732.4635; found: 732.4639.

**18** :  $[\alpha]_D^{24} = -17.6^\circ$  ( $c = 1.05$ ,  $\text{CHCl}_3$ ); **IR (KBr)** 3454, 2955, 2926, 2854, 1737, 1513, 1463, 1248, 1175, 1078  $\text{cm}^{-1}$ ;  **$^1\text{H-NMR}$  (270 MHz,  $\text{CDCl}_3$ )**  $\delta$  0.99 (s, 3H,  $\text{CH}_3\text{Si}$ ), 0.11 (s, 3H,  $\text{CH}_3\text{Si}$ ), 0.77 (d, 3H,  $J = 6.9$  Hz,  $\text{CH}_3$ ), 0.78 (d, 3H,  $J = 5.9$  Hz,  $\text{CH}_3$ ), 0.86 (s, 9H,  $\text{CH}_3\text{CSi}$ ), 0.88 (m, 3H,  $\text{CH}_3$ ), 1.05 (d, 3H,  $J = 6.9$  Hz,  $\text{CH}_3$ ), 0.72-1.17 (m, 5H,  $\text{CH}_2 \times 2$  and  $1/2 \text{CH}_2$ ), 1.21-2.12 (m, 13H,  $\text{CH}_2 \times 3$ ,  $1/2 \text{CH}_2$  and  $\text{CH} \times 6$ ), 2.18-2.40 (m, 4H,  $\text{C}_3\text{-H}$  and  $\text{C}_{17}\text{-H}$ ), 3.27 (dd, 1H,  $J = 8.9, 7.3$  Hz,  $1/2 \text{CH}_2\text{OPMB}$ ), 3.36 (dd, 1H,  $J = 8.9, 5.9$  Hz,  $1/2 \text{CH}_2\text{OPMB}$ ), 3.80 (s, 3H,  $\text{OCH}_3$ ), 4.00 (m, 1H,  $\text{C}_{16}\text{-H}$ ), 4.40 (d, 1H,  $J = 11.9$  Hz,  $1/2 \text{CH}_2\text{Ph}$ ), 4.44 (d, 1H,  $J = 11.9$  Hz,  $1/2 \text{CH}_2\text{Ph}$ ), 4.54 (d, 1H,  $J = 3.3$  Hz,  $\text{C}_8\text{-H}$ ), 5.04 (m, 1H,  $\text{C}_2\text{-H}$ ), 5.90 (m, 1H,  $\text{C}_4\text{-H}$ ), 6.38 (dd, 1H,  $J = 14.2, 11.5$  Hz,  $\text{C}_5\text{-H}$ ), 6.74 (d, 1H,  $J = 11.5$  Hz,  $\text{C}_6\text{-H}$ ), 6.87 (d, 2H,  $J = 8.6$  Hz,  $\text{ArH}$ ), 7.25 (d, 2H,  $J = 8.6$  Hz,  $\text{ArH}$ );  **$^{13}\text{C-NMR}$  (67.5 MHz,  $\text{CDCl}_3$ )**  $\delta$  -5.2, -4.3, 12.4, 17.9, 18.5, 19.9, 20.7, 25.0, 25.7, 25.9, 26.0, 29.4, 30.2, 35.7, 35.9, 37.0, 37.4, 37.5, 41.6, 43.8, 46.4, 48.4, 55.2, 72.0, 72.8, 73.2, 74.3, 74.7,

77.2, 112.4, 113.8, 126.7, 129.0, 130.7, 142.2, 145.8, 159.1, 171.3; **HRMS [FAB, m-NBA]** calcd for  $C_{42}H_{67}O_6NSiNa$  [ $M+Na^+$ ]: 732.4635; found: 732.4642.

NOE experiments were employed to verify the stereochemical assignment for the olefin isomers.

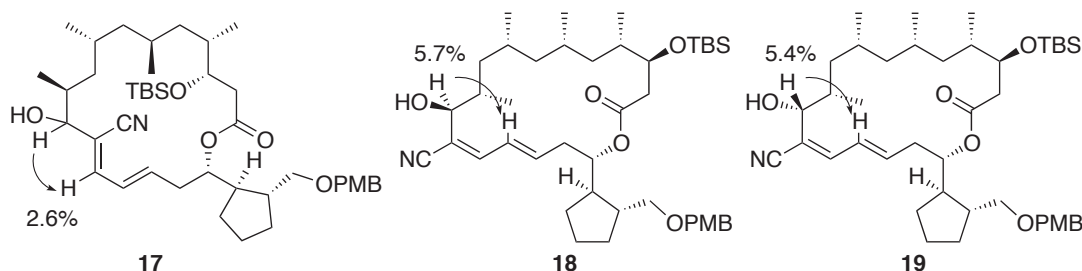

NOE experiments of **17**, **18** and **19**

**(1'R,2S,2'R,8R,9S,11R,13S,15S,16S)-16-(tert-Butyldimethyl-silyloxy)-8-hydroxy-2-[2'-(4''-methoxybenzyloxymethyl)cyclopentyl]-9,11,13,15-tetramethyl-18-oxo-oxaoctadeca-4E,6Z-diene-7-carbonitrile (**19**)** (Oxidation/Reduction)

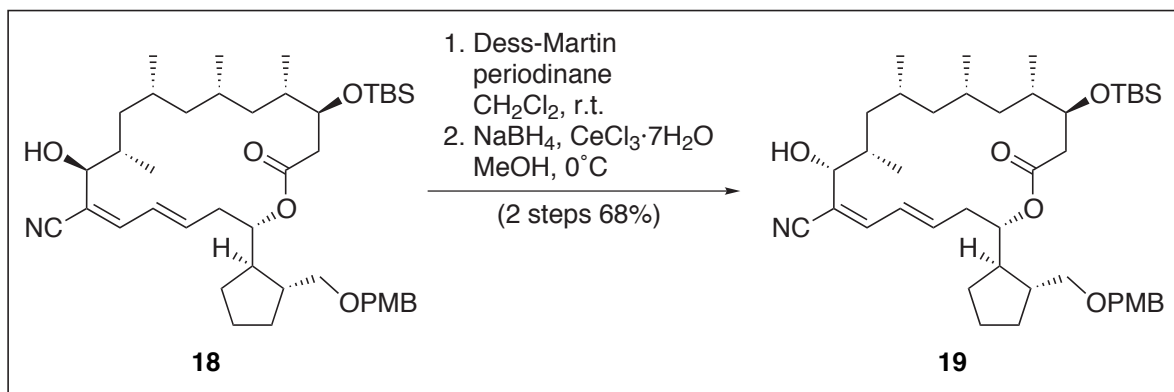

To a solution of **18** (13.2 mg, 18.6  $\mu mol$ ) in  $CH_2Cl_2$  (1 ml) was added Dess-Martin periodinane (22.6 mg, 55.9  $\mu mol$ ). After stirred for 30 min, the reaction was quenched by sat. aq.  $Na_2S_2O_3$  and sat. aq.  $NaHCO_3$  solutions, and the aqueous phase was extracted with  $CH_2Cl_2$ . The combined organic extracts were dried over anhydrous  $Na_2SO_4$  and concentrated in vacuo. The residue was subjected to the next reaction.

To a solution of the crude ketone in MeOH (1 ml) at  $0^\circ C$  was added cerium chloride (14.0 mg, 37.2  $\mu mol$ ) followed by sodium borohydride (1.4 mg, 37.2  $\mu mol$ ). The reaction was stirred for 10 min, and then poured into water. The aqueous phase was extracted with EtOAc. The combined organic extracts were dried over anhydrous  $Na_2SO_4$  and concentrated in vacuo. Flash

chromatography (8:1 hexanes/EtOAc) afforded **19** (8.5 mg, 2 steps 66%) and **18** (0.7 mg, 2 steps 5.3%) as a yellow oil.

**(1'R,2S,2'R,8R,9S,11R,13S,15S,16S)-9,16-Bis(*tert*-butyldimethylsilyloxy)-2-[2'-(4''-methoxybenzyloxymethyl)cyclopentyl]-9,11,13,15-tetramethyl-18-oxo-oxaoctadeca-4*E*,6*Z*-diene-7-carbonitrile (**19a**)**

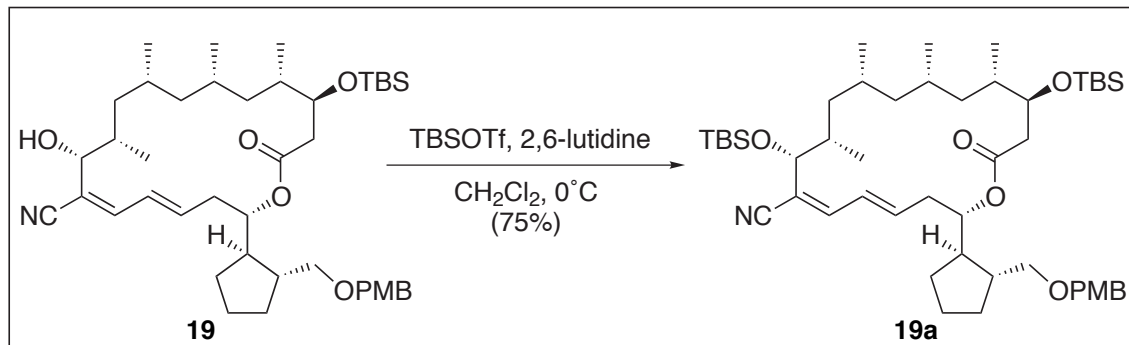

To a 0°C cooled solution of **19** (13.1 mg, 18.4 μmol) in CH<sub>2</sub>Cl<sub>2</sub> (200 μl) was added 2,6-lutidine (4 μl, 31.4 μmol) followed by TBSOTf (6 μl, 24.0 μmol). The resulting solution was then stirred at 0°C for 1 hr. The reaction was poured into water and the aqueous phase was extracted with CH<sub>2</sub>Cl<sub>2</sub>. The combined organic extracts were dried over anhydrous Na<sub>2</sub>SO<sub>4</sub> and concentrated in vacuo. Flash chromatography (25:1 hexanes/EtOAc) afforded **19a** (11.4 mg, 75%) as a colorless oil.

$[\alpha]_D^{25} = -37.8^\circ$  ( $c = 0.69$ , CHCl<sub>3</sub>); **IR (KBr)** 2956, 2928, 2856, 1738, 1612, 1513, 1250, 1084 cm<sup>-1</sup>; **<sup>1</sup>H-NMR (270 MHz, CDCl<sub>3</sub>)** δ 0.00 (s, 3H, CH<sub>3</sub>Si), 0.05 (s, 3H, CH<sub>3</sub>Si), 0.10 (s, 3H, CH<sub>3</sub>Si), 0.12 (s, 3H, CH<sub>3</sub>Si), 0.78-1.20 (m, 17H, CH<sub>3</sub> x 4, CH<sub>2</sub> x 2 and 1/2 CH<sub>2</sub>), 0.90 (s, 9H, CH<sub>3</sub>CSi), 0.91 (s, 9H, CH<sub>3</sub>CSi), 1.23-2.09 (m, 11H, CH<sub>2</sub> x 3, 1/2 CH<sub>2</sub> and CH x 4), 2.16-2.33 (m, 5H, C<sub>17</sub>-H, 1/2 C<sub>3</sub>-H and CH x 2), 2.52 (m, 1H, 1/2 C<sub>3</sub>-H), 3.17 (dd, 1H,  $J = 8.6, 8.3$  Hz, 1/2 CH<sub>2</sub>OPMB), 3.35 (dd, 1H,  $J = 8.9, 4.9$  Hz, 1/2 CH<sub>2</sub>OPMB), 3.80 (s, 3H, OCH<sub>3</sub>), 3.98-4.10 (m, 2H, C<sub>8</sub>-H and C<sub>16</sub>-H), 4.39 (d, 1H,  $J = 11.9$  Hz, 1/2 CH<sub>2</sub>Ph), 4.43 (d, 1H,  $J = 11.9$  Hz, 1/2 CH<sub>2</sub>Ph), 5.02 (m, 1H, C<sub>2</sub>-H), 6.09-6.32 (m, 2H, C<sub>4</sub>-H and C<sub>5</sub>-H), 6.75 (d, 1H,  $J = 10.6$  Hz, C<sub>6</sub>-H), 6.87 (d, 2H,  $J = 8.6$  Hz, ArH), 7.23 (d, 2H,  $J = 8.6$  Hz, ArH); **<sup>13</sup>C-NMR (67.5 MHz, CDCl<sub>3</sub>)** δ -5.6, -4.9, -4.6, -3.5, 15.3, 17.9, 18.1, 18.5, 20.0, 20.7, 22.6, 25.0, 25.6, 25.7, 26.1, 26.2, 29.7, 30.0, 30.2, 35.6, 35.9, 36.3, 37.1, 42.9, 43.5, 48.1, 55.2, 72.6, 73.3, 73.9, 74.0, 75.3, 77.2, 113.8, 118.8, 127.1, 129.0, 130.7, 139.0, 142.9, 159.1, 171.5; **HRMS [FAB, m-NBA]** calcd for C<sub>48</sub>H<sub>81</sub>O<sub>6</sub>NSi<sub>2</sub>Na [M+Na<sup>+</sup>]:



846.5500; found: 846.5494.

**(1'R,2S,2'R,8R,9S,11R,13S,15S,16S)-9,16-Bis(*tert*-butyldimethyl-silyloxy)-2-(2'-hydroxymethylcyclopentyl)-9,11,13,15-tetramethyl-18-oxo-oxaoctadeca-4*E*,6*Z*-diene-7-carbonitrile (**19b**)**

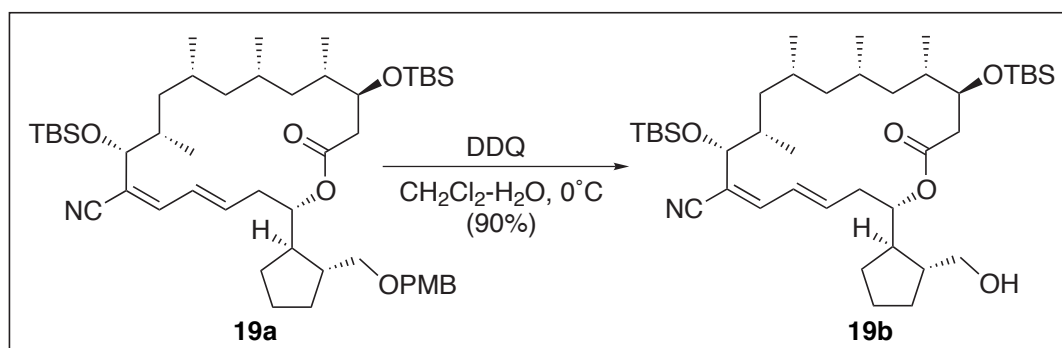

To a solution of **19a** (11.4 mg, 13.9  $\mu$ mol) in CH<sub>2</sub>Cl<sub>2</sub> (250  $\mu$ l) and H<sub>2</sub>O (50  $\mu$ l) was added DDQ (3.7 mg, 16.6  $\mu$ mol) at 0°C. The reaction mixture was stirred for 15 min, and then poured into water. The aqueous phase was extracted with EtOAc. The combined organic extracts were dried over anhydrous Na<sub>2</sub>SO<sub>4</sub> and concentrated in vacuo. Flash chromatography (8:1 hexanes/EtOAc) afforded **19b** (8.8 mg, 90%) as a colorless oil.

$[\alpha]_D^{25} = -37.2^\circ$  ( $c = 0.36$ , CHCl<sub>3</sub>); **IR** (KBr) 3447, 2956, 2927, 2856, 1740, 1464, 1386, 1292, 1253, 1081 cm<sup>-1</sup>; **<sup>1</sup>H-NMR** (270 MHz, CDCl<sub>3</sub>)  $\delta$  -0.01 (s, 3H, CH<sub>3</sub>Si), 0.05 (s, 3H, CH<sub>3</sub>Si), 0.11 (s, 3H, CH<sub>3</sub>Si), 0.13 (s, 3H, CH<sub>3</sub>Si), 0.80 (d, 3H,  $J = 5.9$  Hz, CH<sub>3</sub>), 0.81 (d, 3H,  $J = 7.3$  Hz, CH<sub>3</sub>), 0.85 (d, 3H,  $J = 6.6$  Hz, CH<sub>3</sub>), 0.90 (s, 9H, CH<sub>3</sub>CSi), 0.91 (s, 9H, CH<sub>3</sub>CSi), 0.94 (d, 3H,  $J = 6.3$  Hz, CH<sub>3</sub>), 0.67-1.18 (m, 5H, CH<sub>2</sub> x 2 and 1/2 CH<sub>2</sub>), 1.23-2.09 (m, 13H, CH<sub>2</sub> x 3, 1/2 CH<sub>2</sub> and CH x 6), 2.21-2.39 (m, 3H, C<sub>17</sub>-H and 1/2 C<sub>3</sub>-H), 2.54 (m, 1H, 1/2 C<sub>3</sub>-H), 3.42 (dd, 1H,  $J = 10.6, 6.6$  Hz, 1/2 CH<sub>2</sub>OH), 3.51 (dd, 1H,  $J = 10.6, 5.9$  Hz, 1/2 CH<sub>2</sub>OH), 3.99 (d, 1H,  $J = 9.9$  Hz, C<sub>8</sub>-H), 4.08 (m, 1H, C<sub>16</sub>-H), 5.02 (m, 1H, C<sub>2</sub>-H), 6.15 (m, 1H, C<sub>4</sub>-H), 6.28 (dd, 1H,  $J = 15.2, 10.6$  Hz, C<sub>5</sub>-H), 6.75 (d, 1H,  $J = 10.6$  Hz, C<sub>6</sub>-H); **<sup>13</sup>C-NMR** (67.5 MHz, CDCl<sub>3</sub>)  $\delta$  -5.6, -4.9, -4.6, -3.4, 15.3, 17.9, 18.1, 18.4, 20.0, 20.7, 22.7, 25.1, 25.7, 26.1, 26.2, 29.5, 29.7, 30.5, 35.6, 35.9, 36.2, 37.1, 43.4, 43.5, 45.5, 48.0, 66.7, 73.3, 73.9, 75.4, 77.2, 118.7, 127.2, 138.6, 142.8, 171.4; **HRMS** [FAB, m-NBA] calcd for C<sub>40</sub>H<sub>73</sub>O<sub>5</sub>NSi<sub>2</sub>Na [M+Na<sup>+</sup>]: 726.4925; found: 726.4924.

## Borrelidin (1)

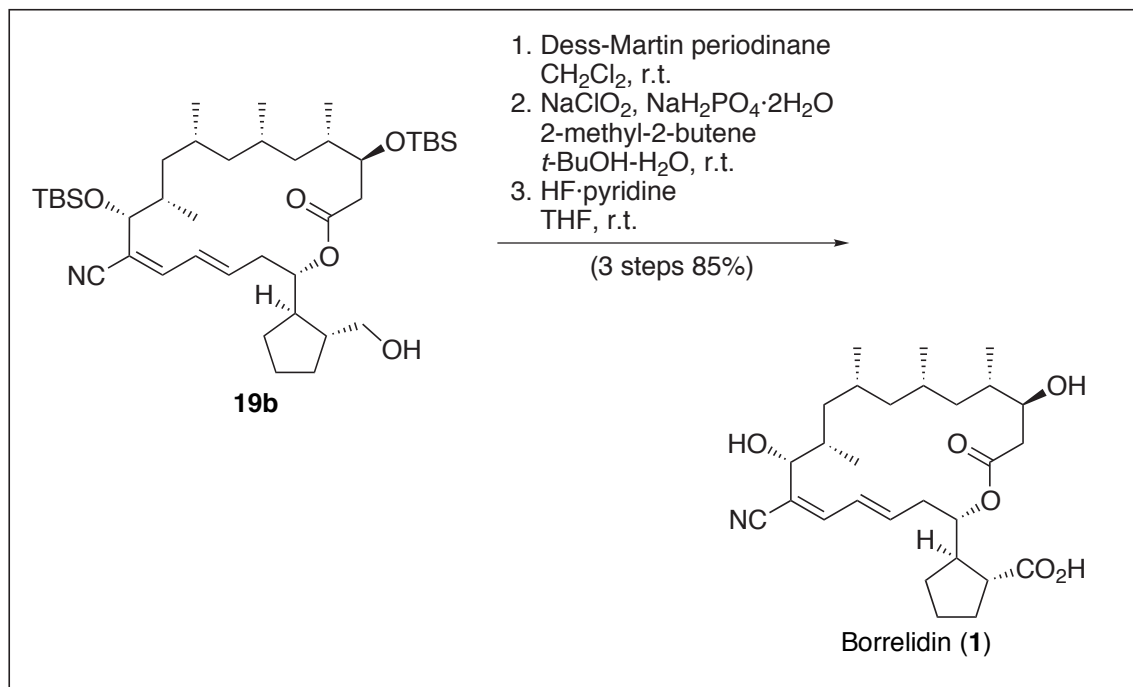

To a solution of **19b** (8.8 mg, 12.5  $\mu$ mol) at r.t. was added Dess-Martin periodinane (10.6 mg, 25.0  $\mu$ mol). The mixture was stirred for 30 min. The reaction was quenched with sat. aq. Na<sub>2</sub>S<sub>2</sub>O<sub>3</sub> and sat. aq. Na<sub>2</sub>S<sub>2</sub>O<sub>3</sub> solutions, and the aqueous phase was extracted with CH<sub>2</sub>Cl<sub>2</sub>. The combined organic extracts were dried over anhydrous Na<sub>2</sub>SO<sub>4</sub> and concentrated in vacuo. The resulting crude aldehyde was subjected to the next reaction without further purification.

The crude aldehyde was dissolved in *t*-BuOH (250  $\mu$ l) and H<sub>2</sub>O (250  $\mu$ l) at r.t.. 2-Methyl-2-butene (7  $\mu$ l, 62.8  $\mu$ mol), sodium phosphate (5.8 mg, 37.5  $\mu$ mol) and sodium chlorite (3.3 mg, 37.5  $\mu$ mol) was added to the solution. After 30 min, the reaction was poured into water and the aqueous phase was extracted with EtOAc. The combined organic extracts were dried over anhydrous Na<sub>2</sub>SO<sub>4</sub> and concentrated in vacuo to give the corresponding carboxylic acid.

To a solution of the crude acid in THF (1.0 ml) and pyridine (1.0 ml) was added dropwise HF·pyridine (500  $\mu$ l). The solution was stirred for 2 days. The resulting solution was filtered through a short plug of silica gel and concentrated in vacuo. Flash chromatography (30:1 hexanes/EtOAc) afforded borrelidin (**1**) (5.2 mg, 3 steps 85%) as a white solid.

$[\alpha]_D^{27} = -26.7^\circ$  ( $c = 0.10$ , EtOH); m.p. 140–142°C; **IR (KBr)** 3446, 2924, 2853, 1717, 1465, 1275, 1259 cm<sup>-1</sup>; **<sup>1</sup>H-NMR (270 MHz, CDCl<sub>3</sub>)**  $\delta$  0.73 (m, 1H, 1/2 CH<sub>2</sub>), 0.80 (d, 3H,  $J = 6.3$  Hz, CH<sub>3</sub>), 0.83 (d, 3H,  $J = 7.2$  Hz, CH<sub>3</sub>), 0.84 (d, 3H,  $J = 6.6$  Hz, CH<sub>3</sub>), 1.05 (d, 3H,  $J = 6.6$  Hz, CH<sub>3</sub>), 0.89–

1.44 (m, 6H,  $\text{CH}_2$  x 3), 1.50-1.71 (m, 3H,  $\text{CH}$  x 3), 1.75-2.11 (m, 6H,  $\text{CH}_2$  x 2, 1/2  $\text{CH}_2$  and  $\text{CH}$ ), 2.32 (dd, 1H,  $J = 16.8, 2.3$  Hz, 1/2  $\text{CH}_2$ ), 2.44 (dd, 1H,  $J = 16.8, 9.9$  Hz, 1/2  $\text{CH}_2$ ), 2.49-2.78 (m, 4H,  $\text{CH}_2$  and  $\text{CH}$  x 2), 3.87 (dt, 1H,  $J = 9.9, 2.3$  Hz,  $\text{C}_{16}\text{-H}$ ), 4.11 (d, 1H,  $J = 9.6$  Hz,  $\text{C}_8\text{-H}$ ), 4.98 (dt, 1H,  $J = 10.6, 3.3$  Hz,  $\text{C}_2\text{-H}$ ), 6.20 (ddd, 1H,  $J = 14.5, 9.2, 5.3$  Hz,  $\text{C}_4\text{-H}$ ), 6.39 (dd, 1H,  $J = 14.5, 11.2$  Hz,  $\text{C}_5\text{-H}$ ), 6.83 (d, 1H,  $J = 11.2$  Hz,  $\text{C}_6\text{-H}$ );  $^{13}\text{C-NMR}$  (67.5 MHz,  $\text{CDCl}_3$ )  $\delta$  14.9, 16.9, 18.2, 20.1, 25.2, 26.2, 27.1, 29.7, 31.2, 35.2, 35.6, 35.9, 37.4, 39.3, 43.0, 45.8, 47.8, 48.4, 69.8, 73.1, 77.2, 115.9, 118.2, 127.0, 138.5, 144.0, 172.2, 180.6; **HRMS** [FAB, **m-NBA**] calcd for  $\text{C}_{28}\text{H}_{43}\text{O}_6\text{Na}$  [ $\text{M}+\text{Na}^+$ ]: 512.2988; found: 512.2978.

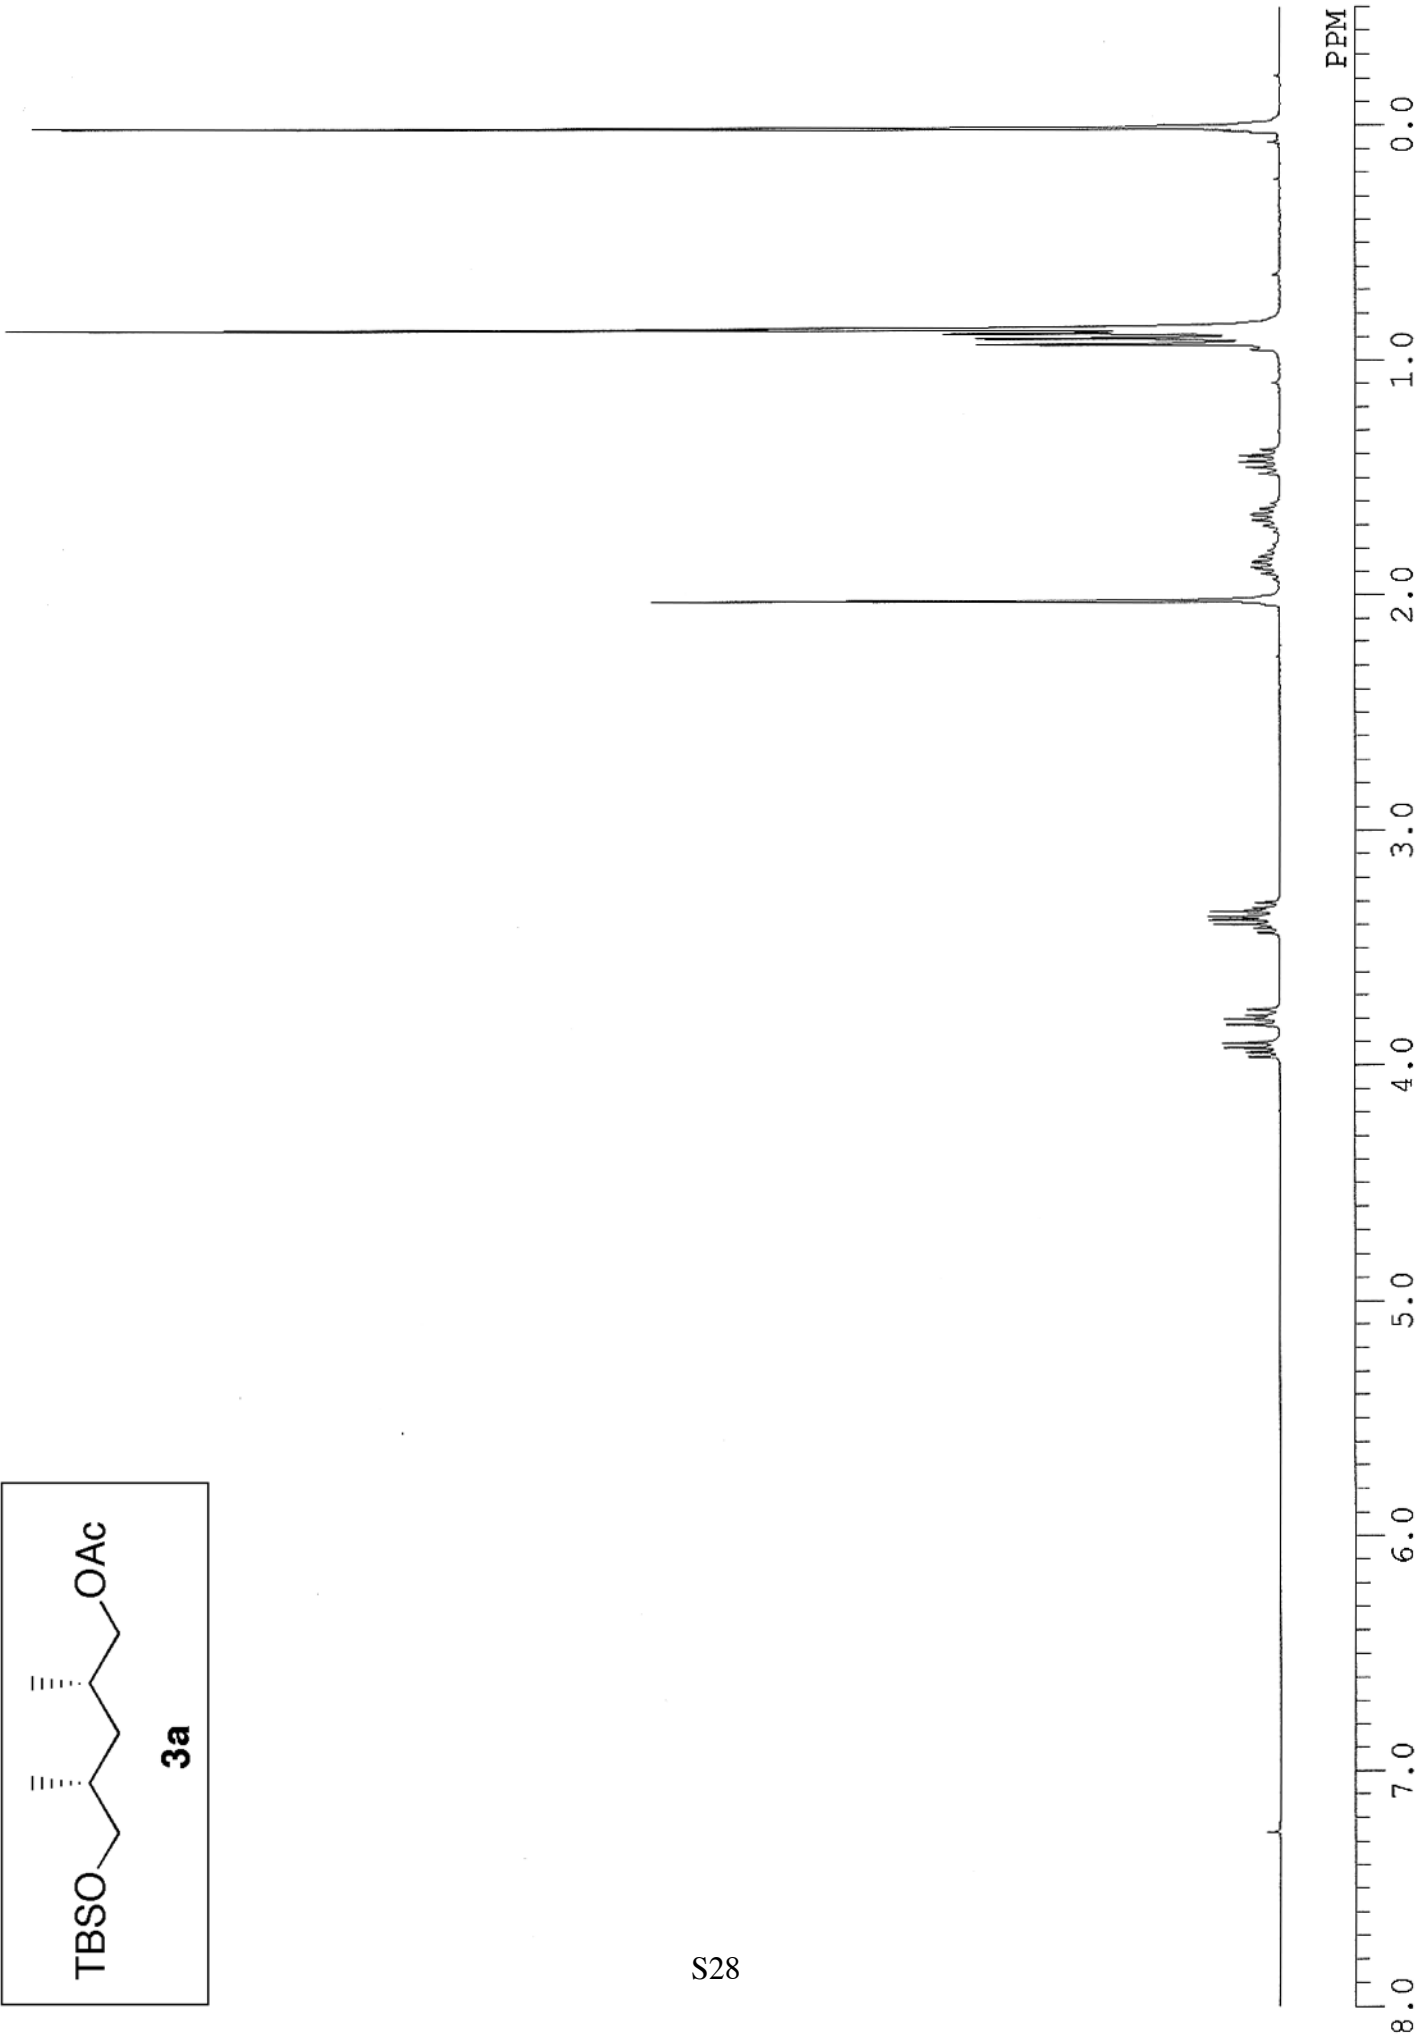

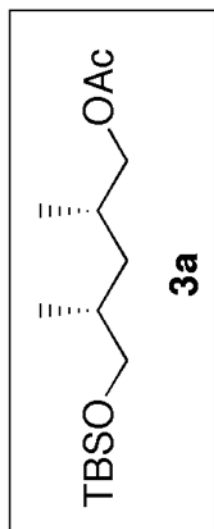

S29

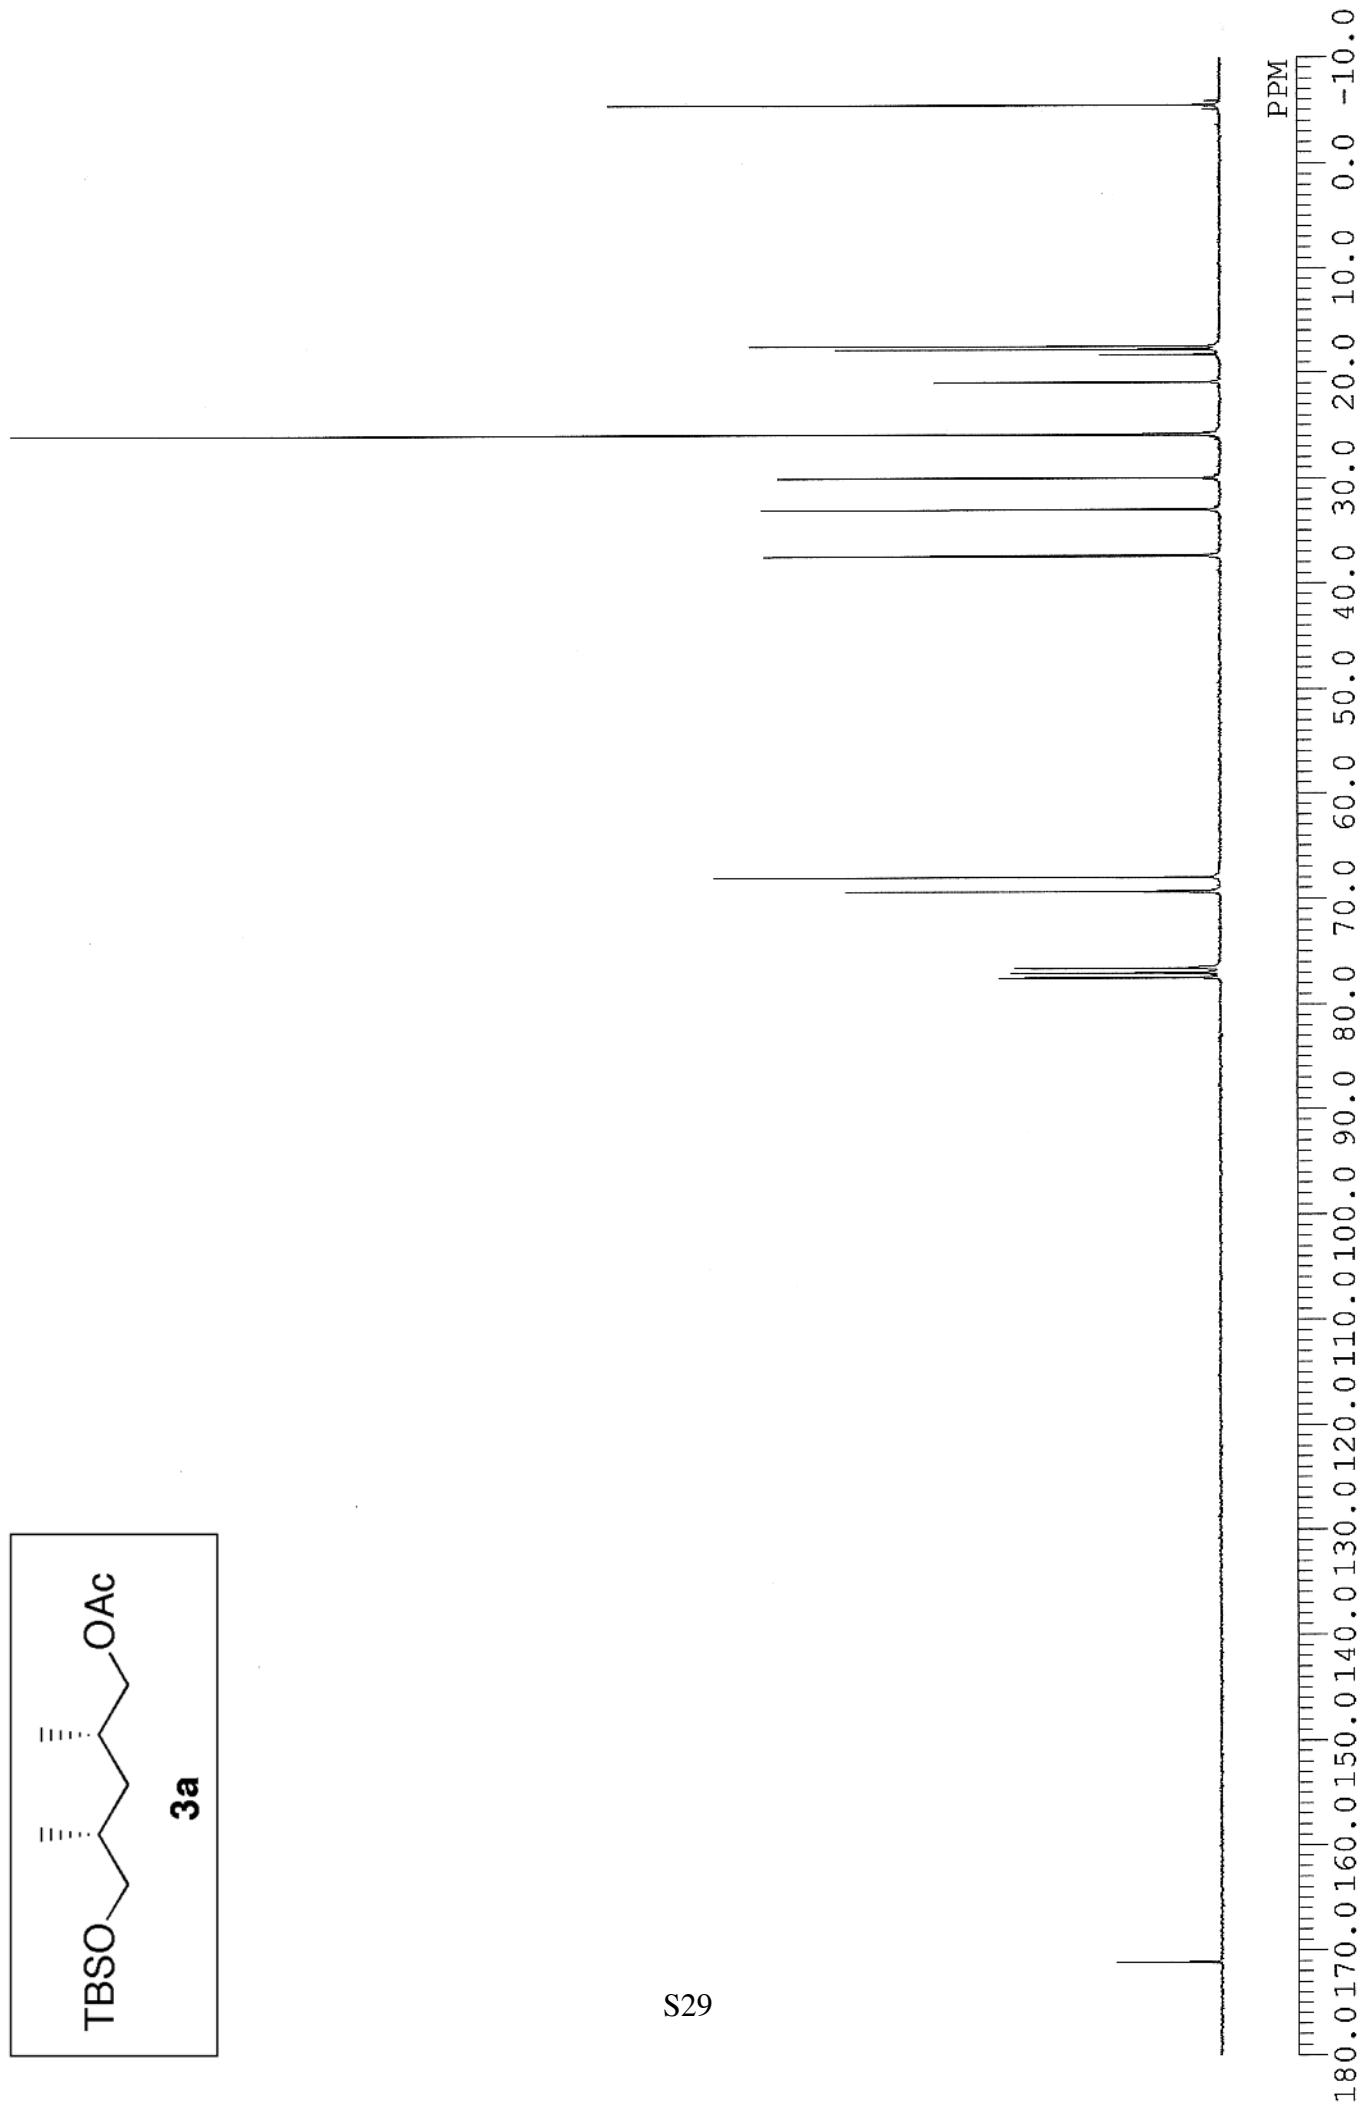

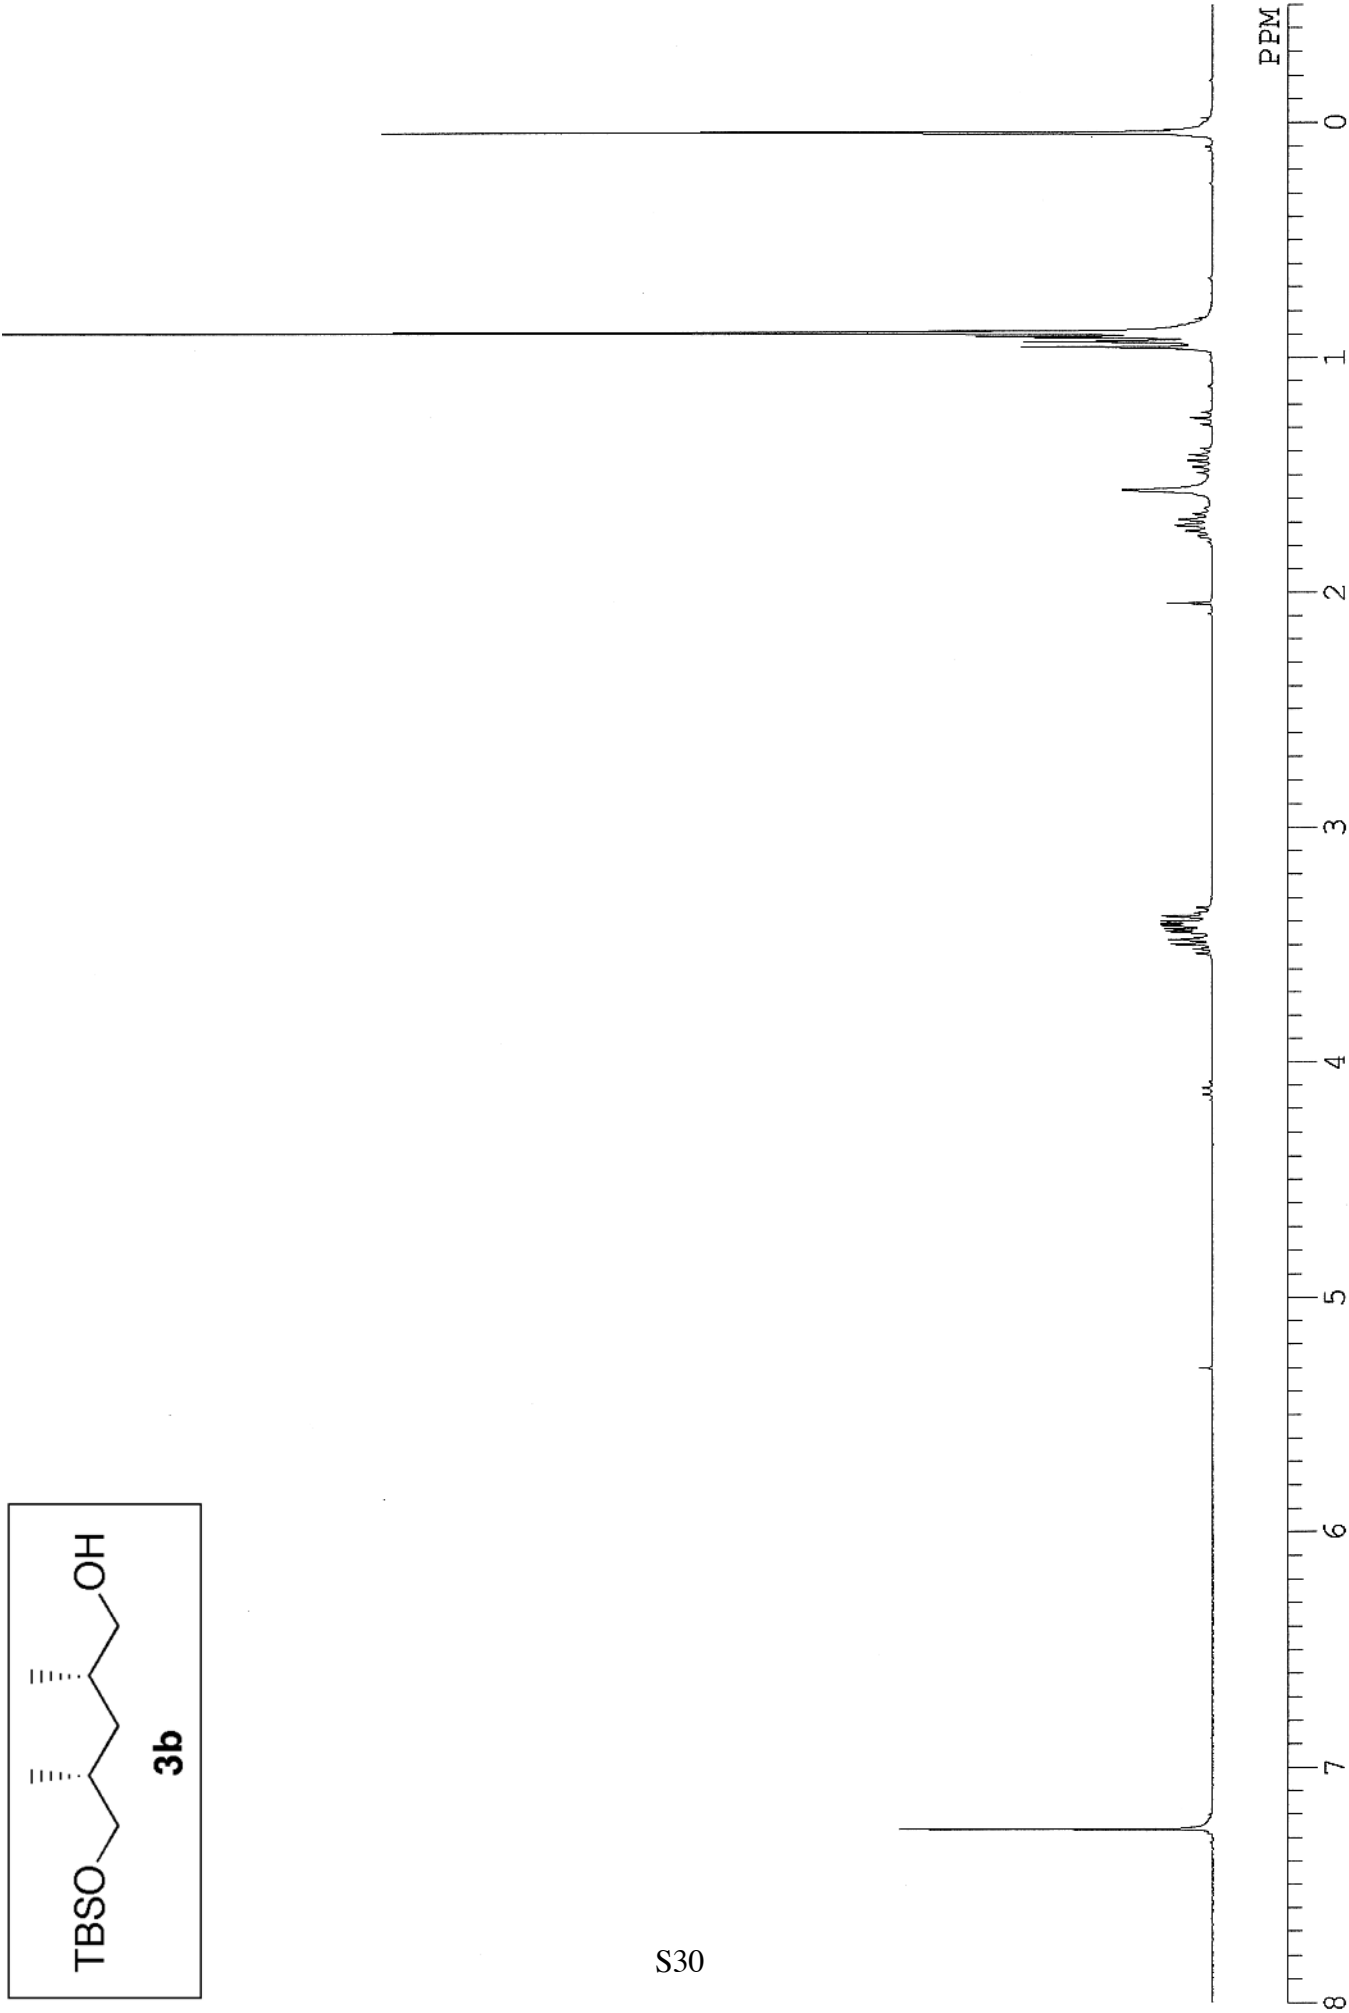

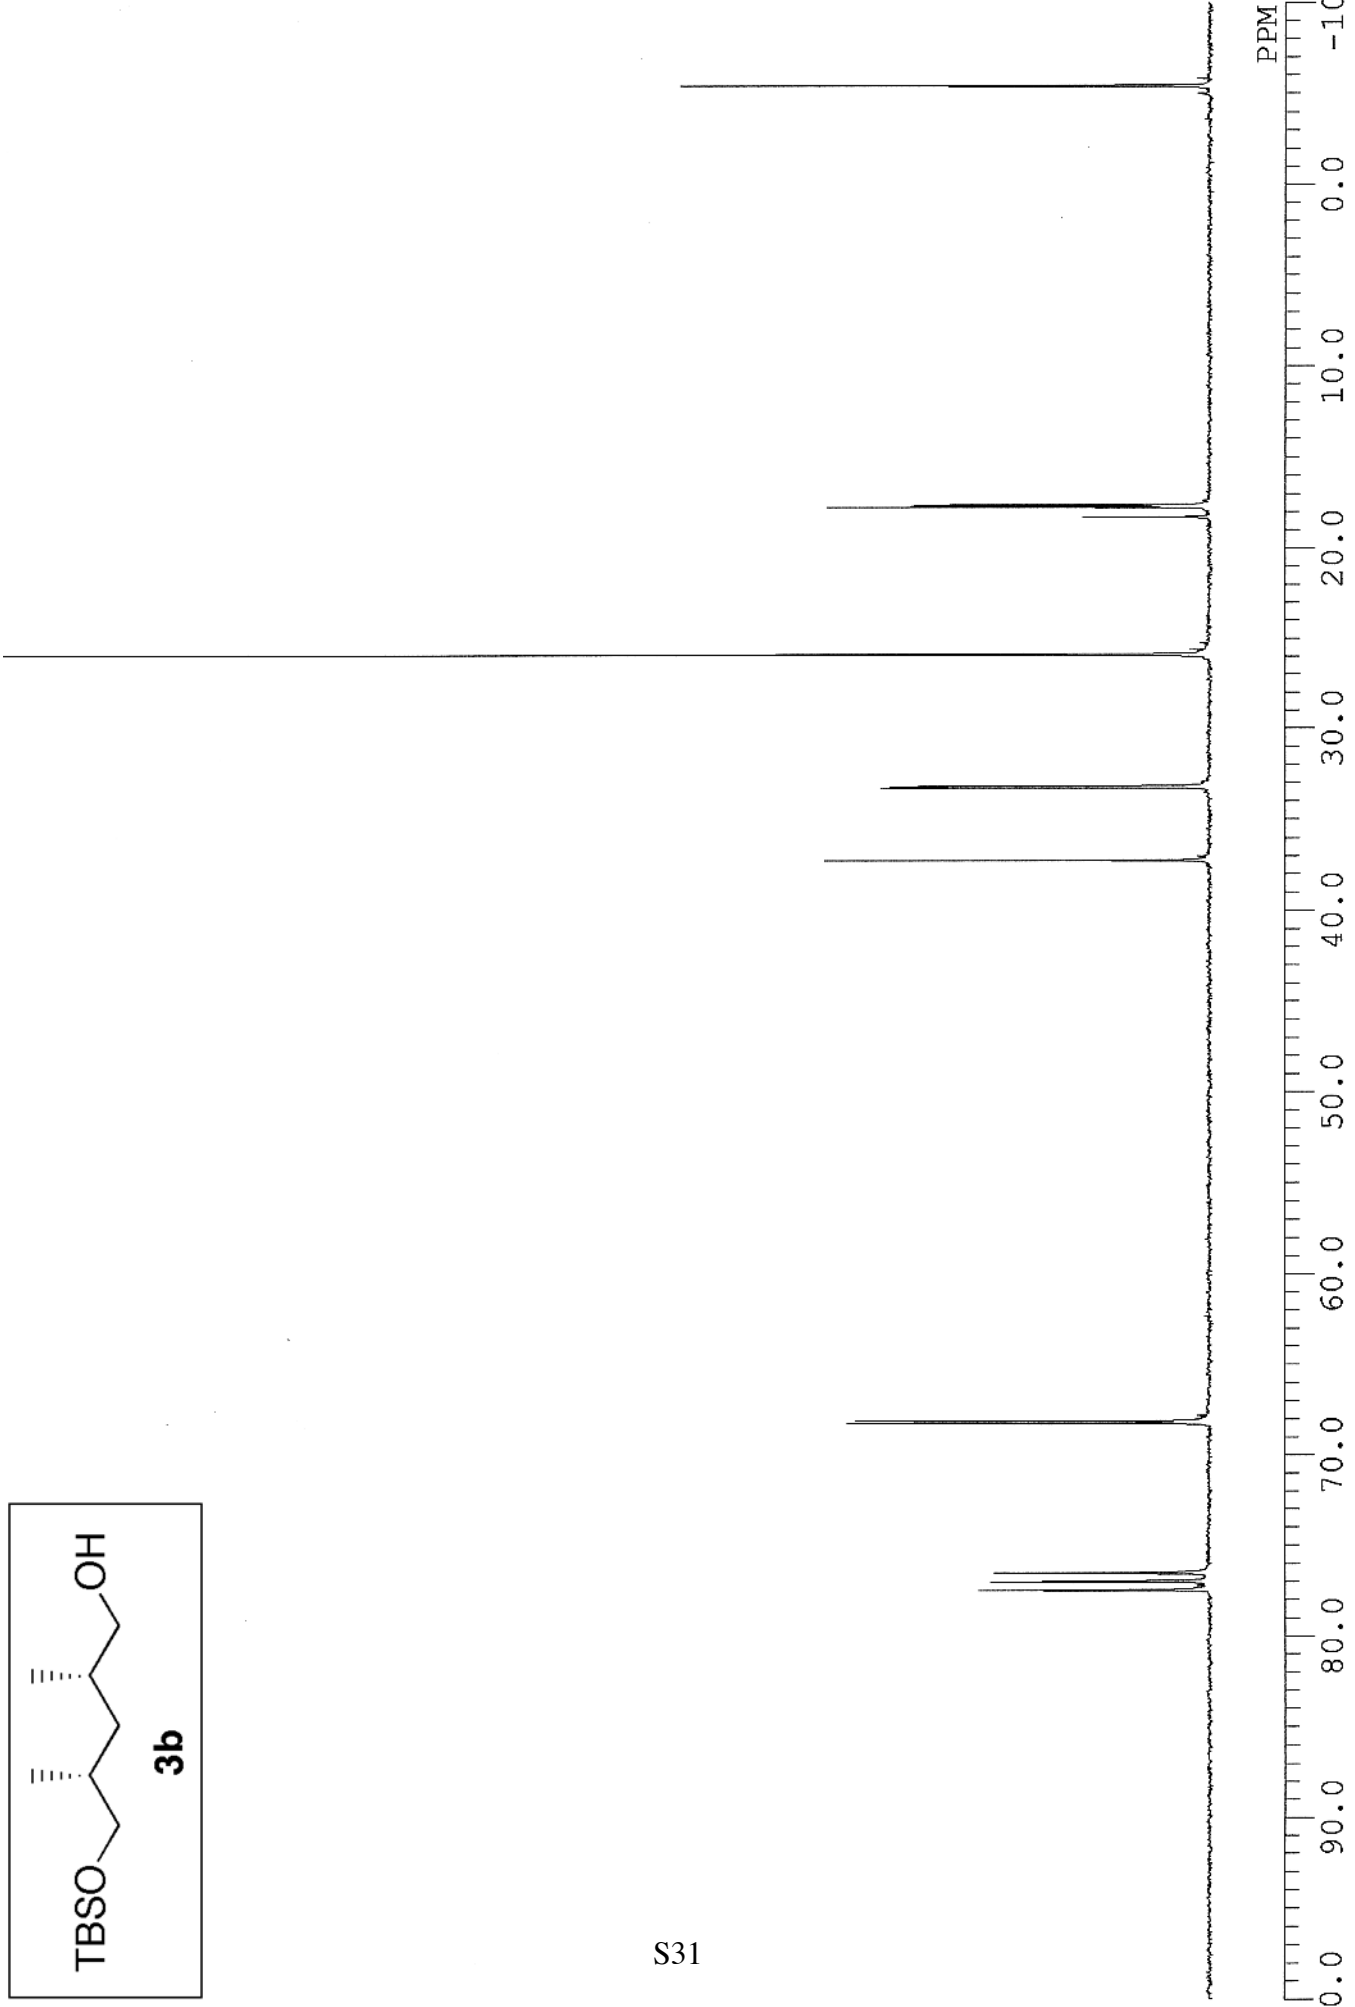

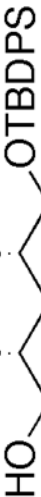

33

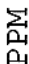



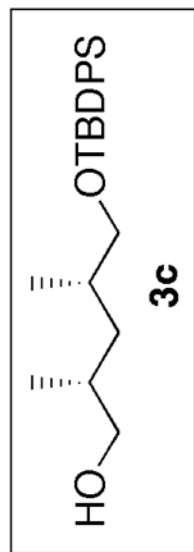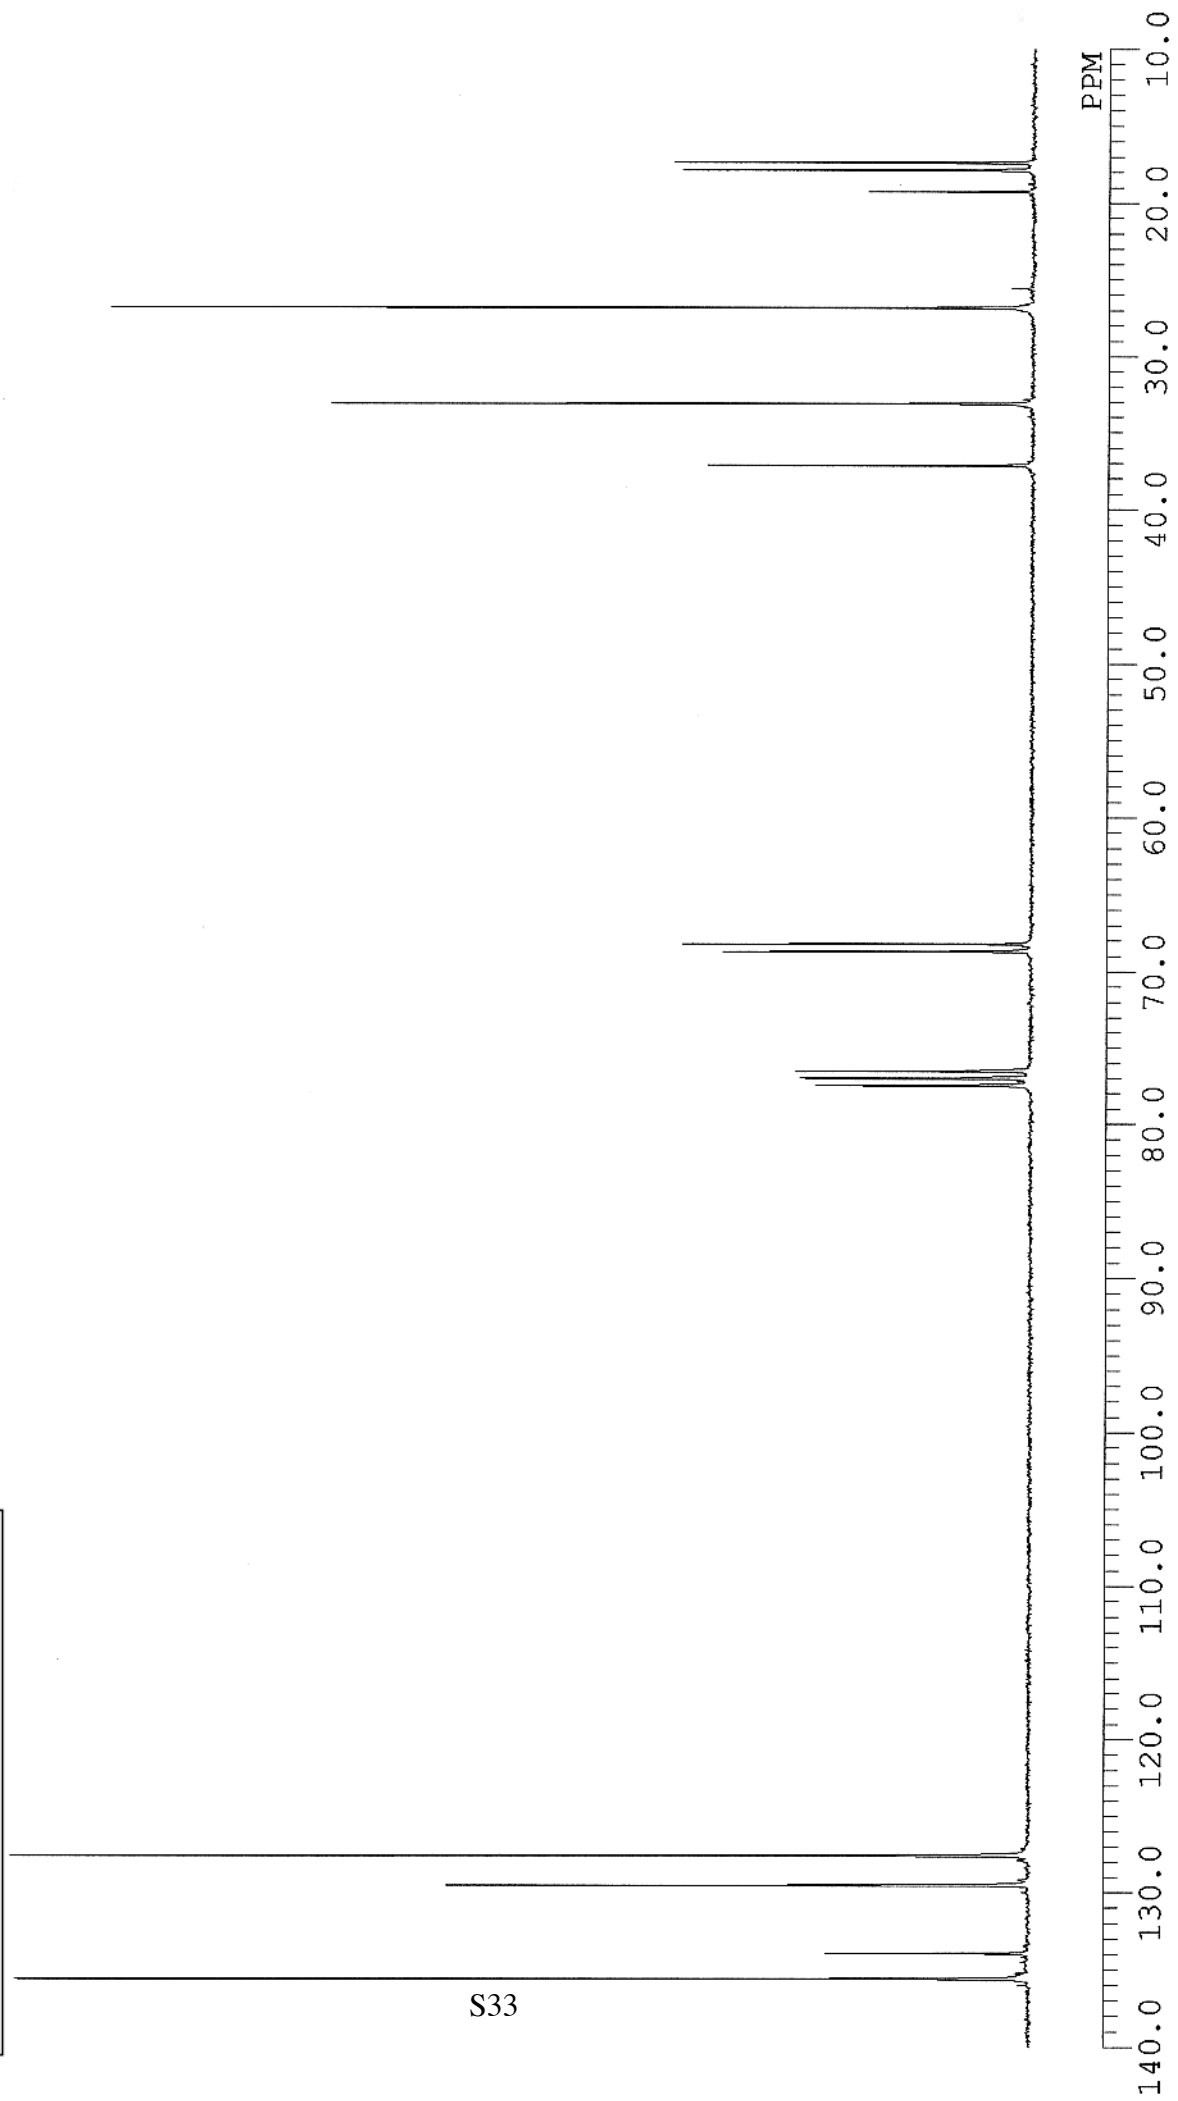

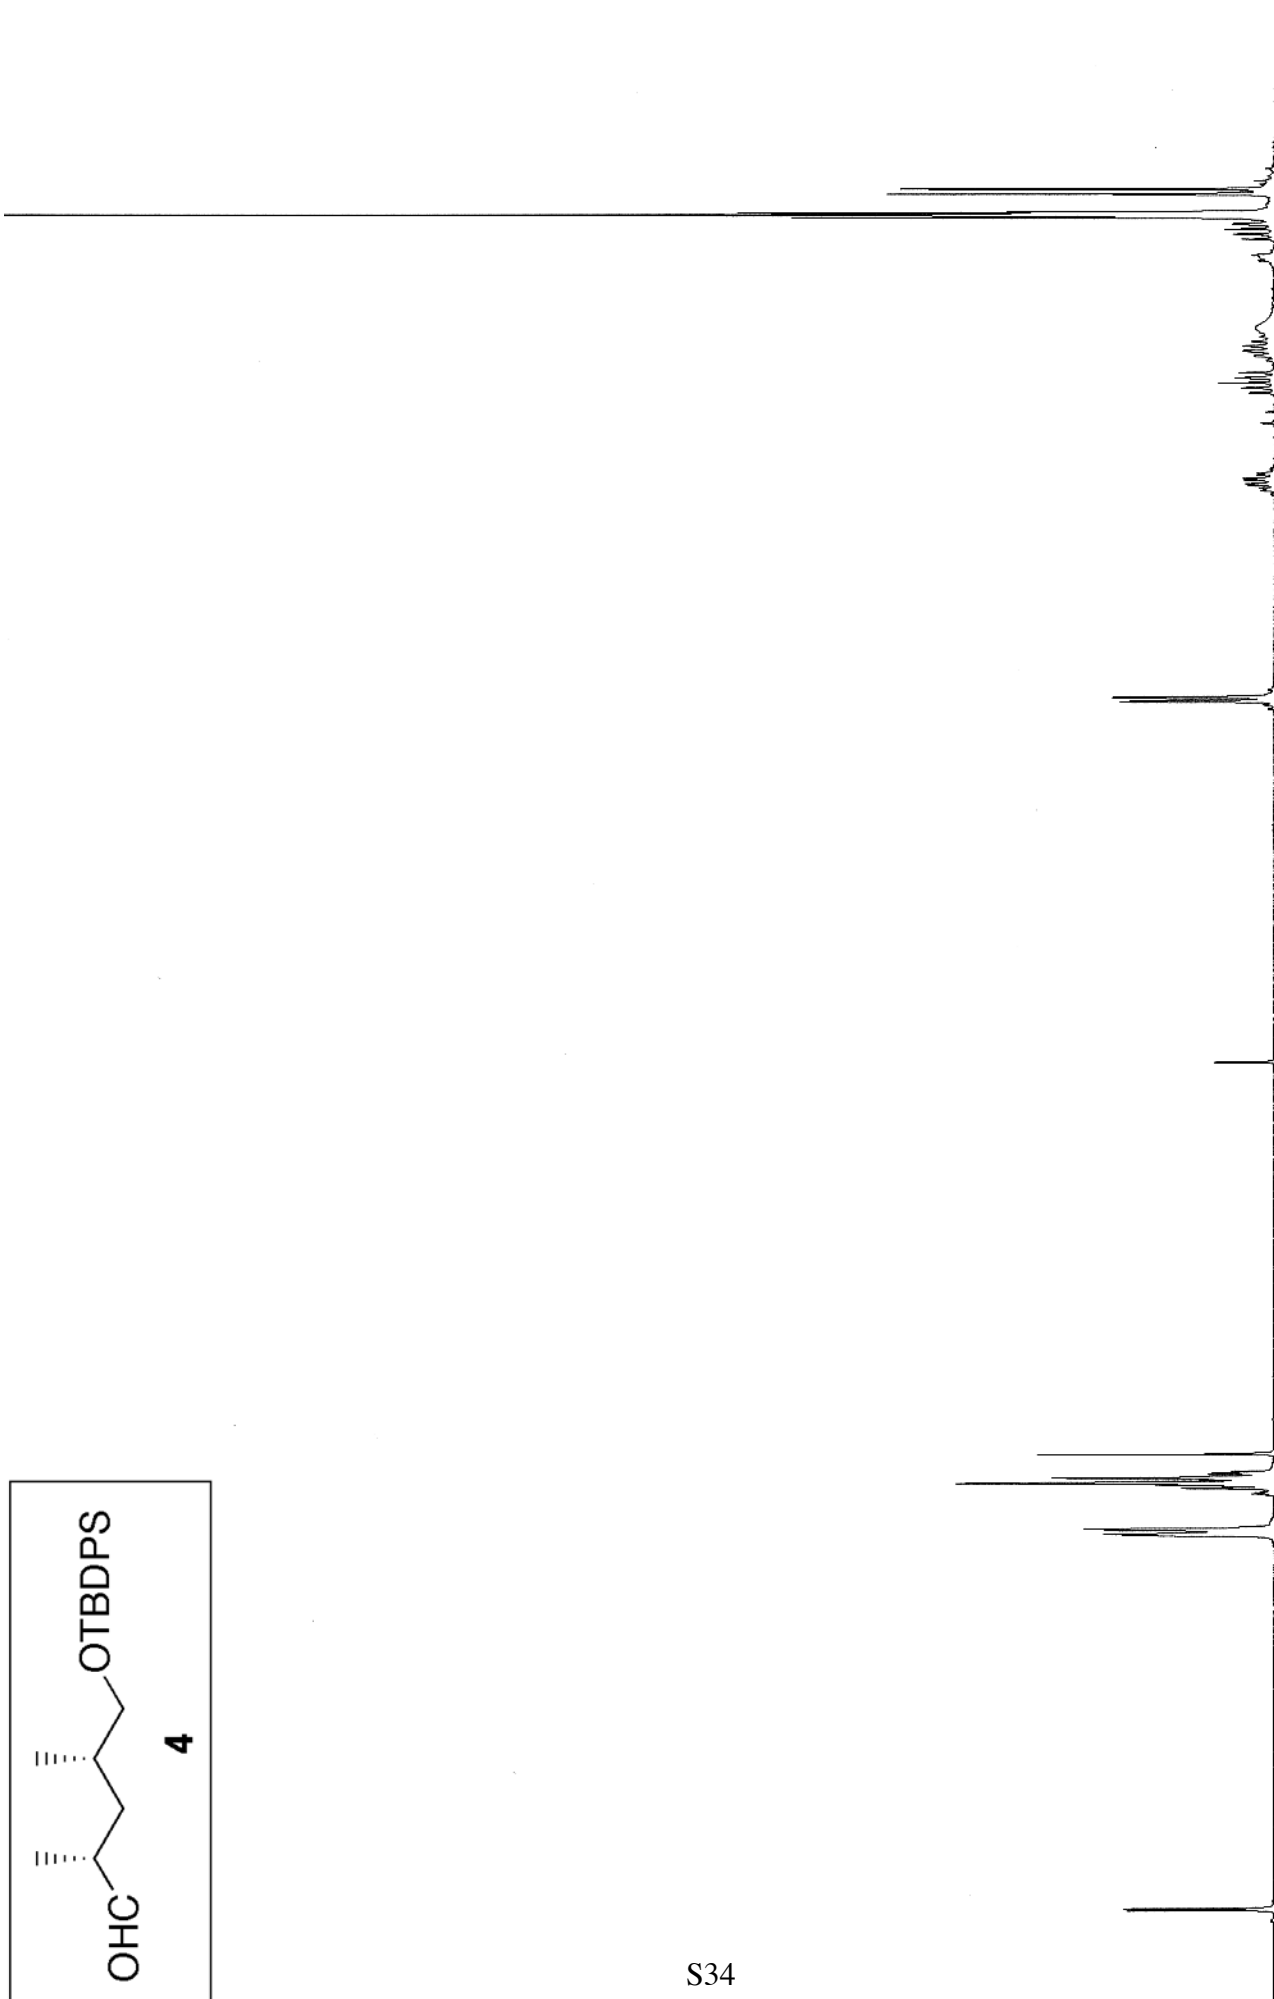

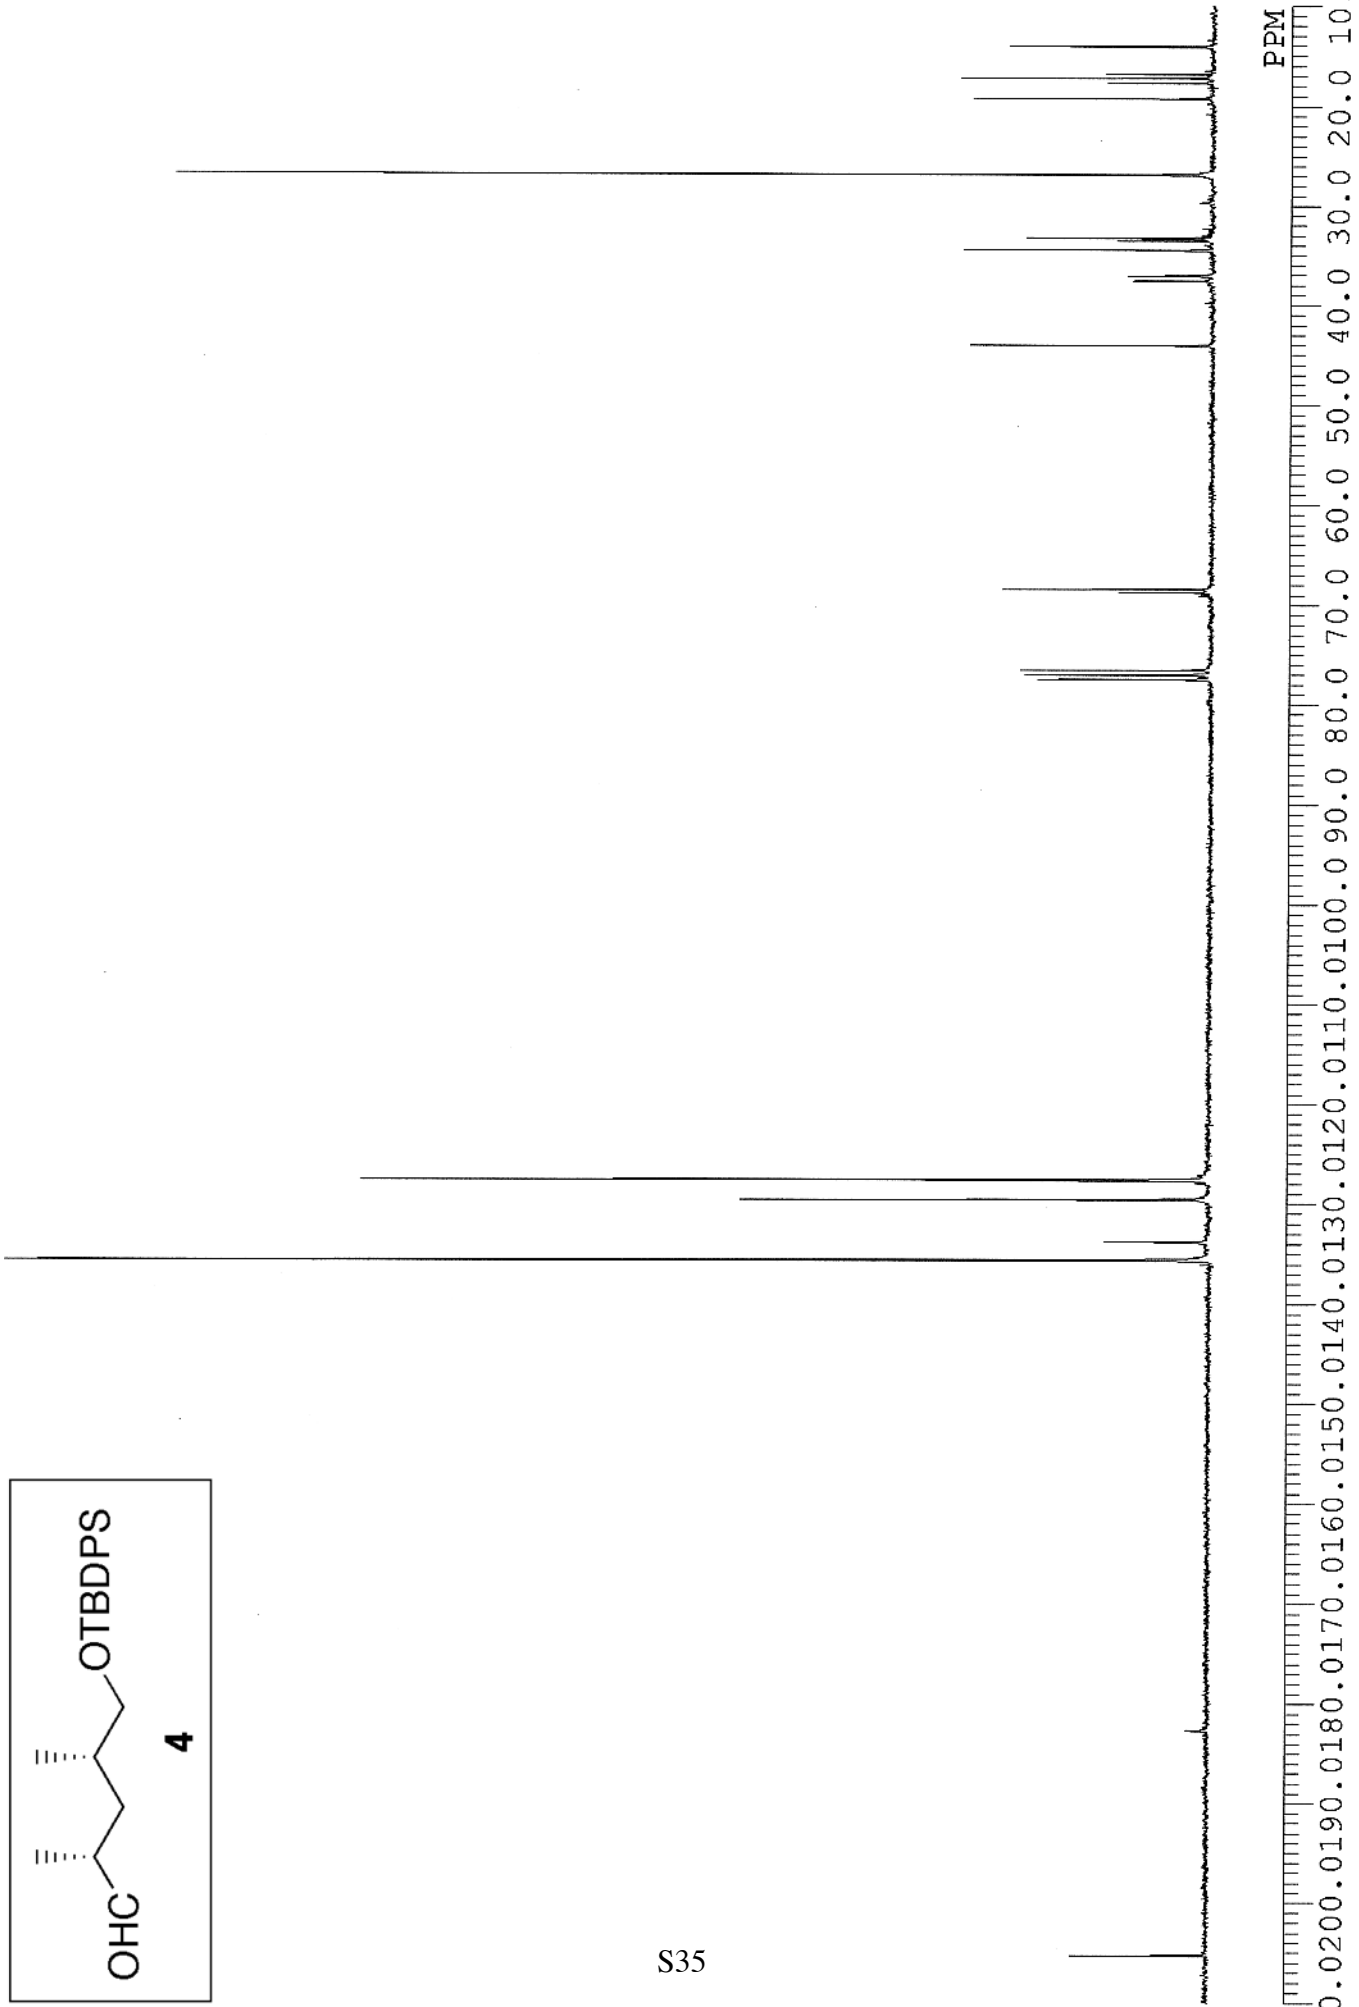

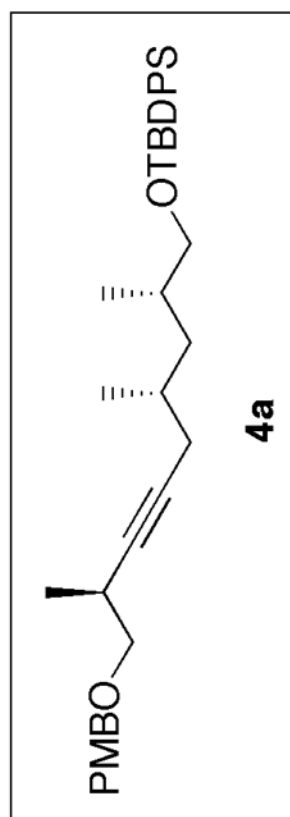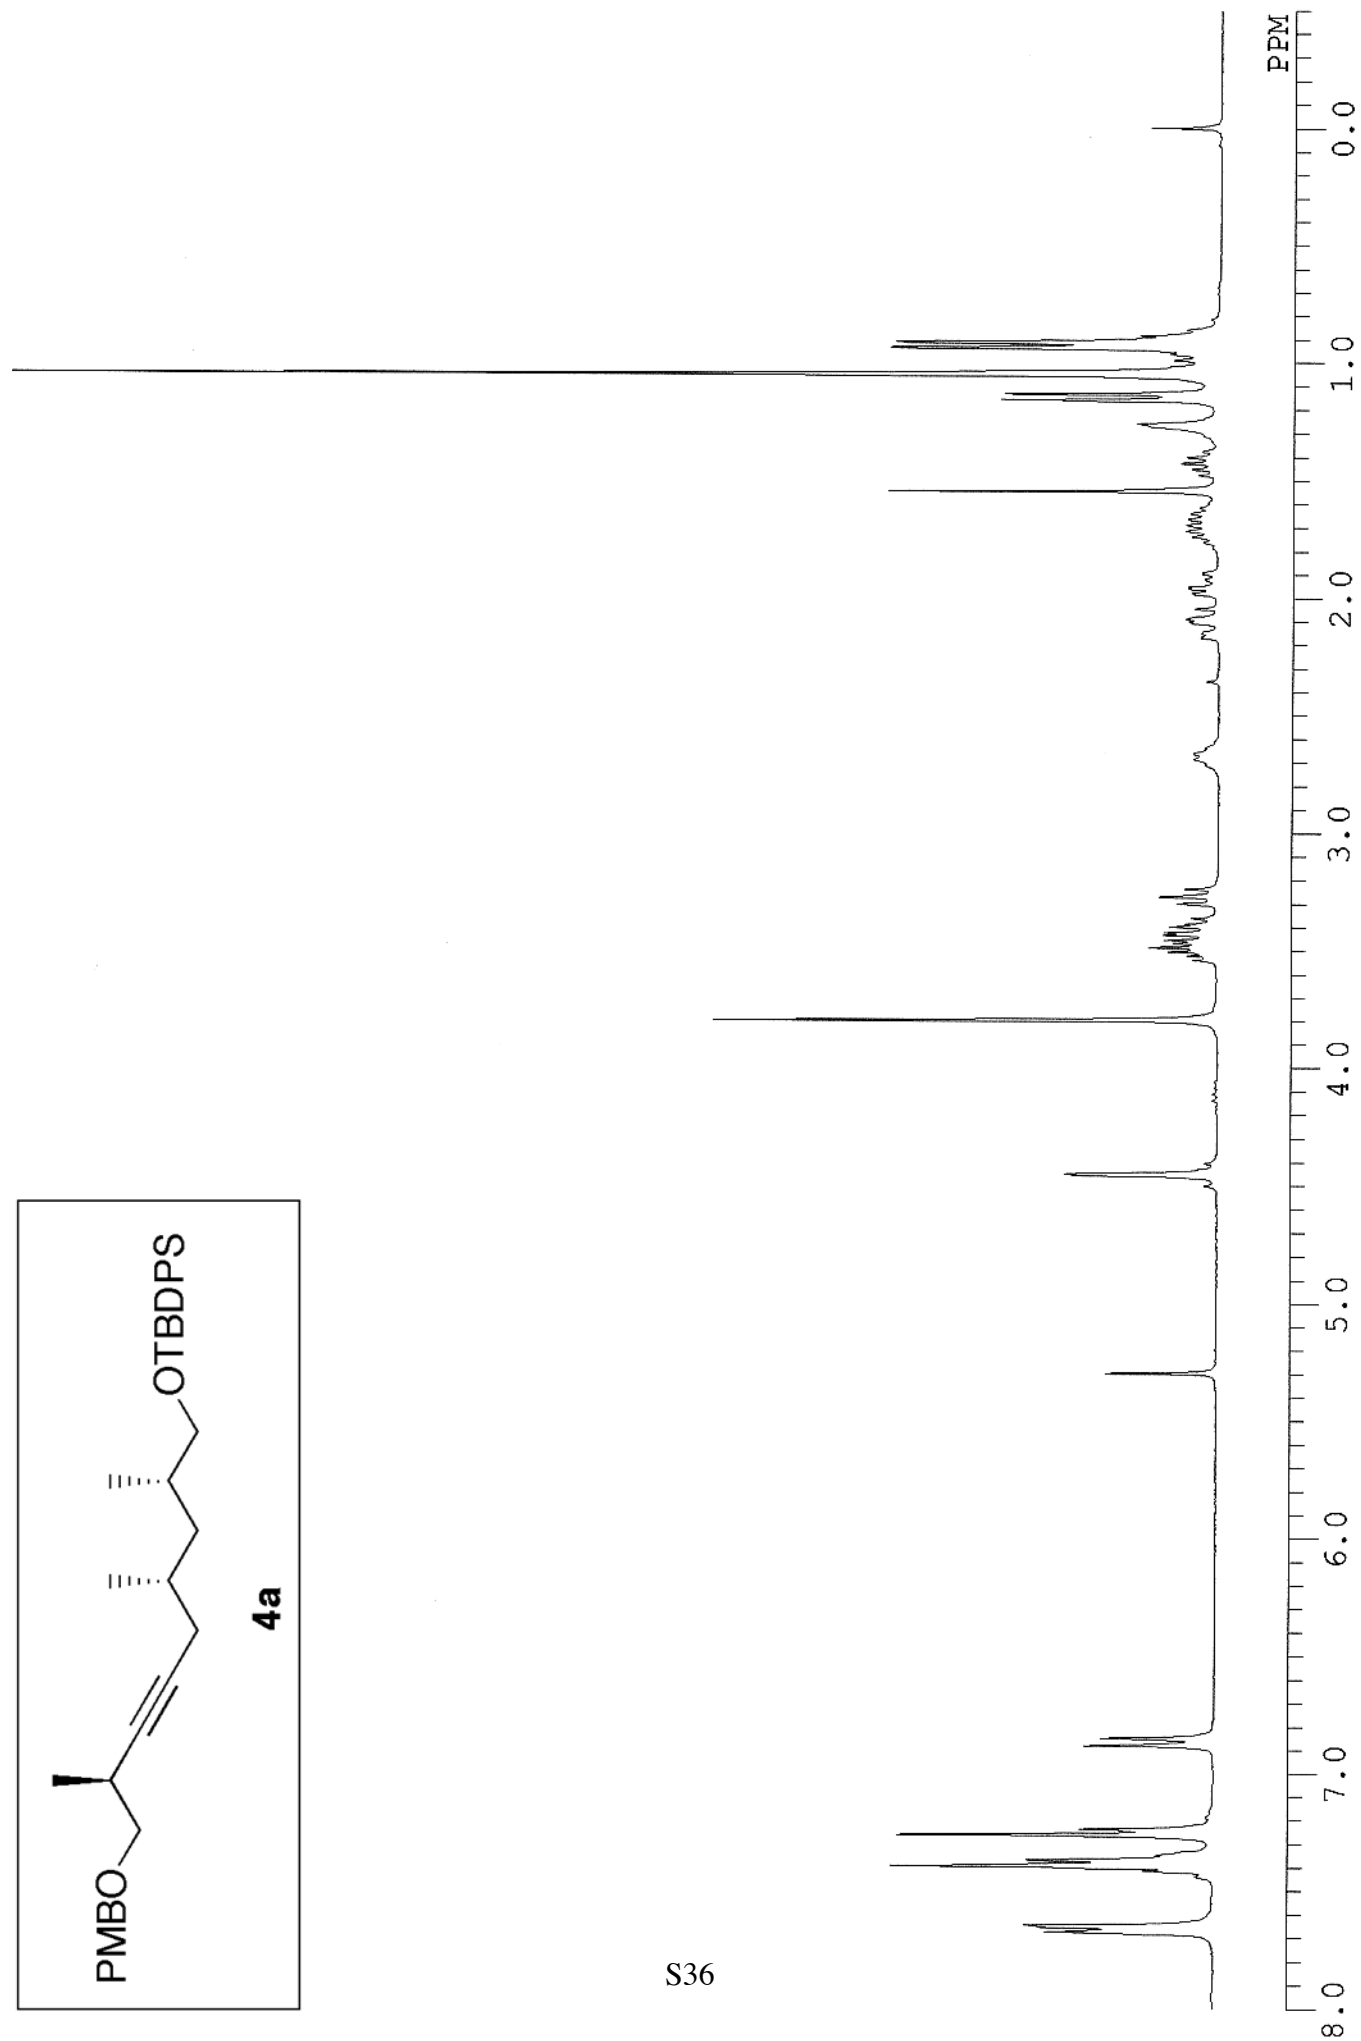

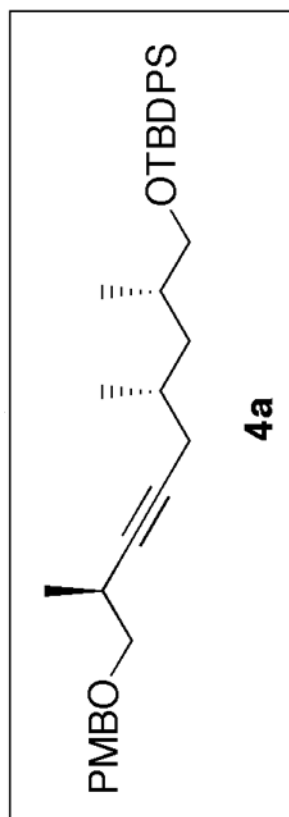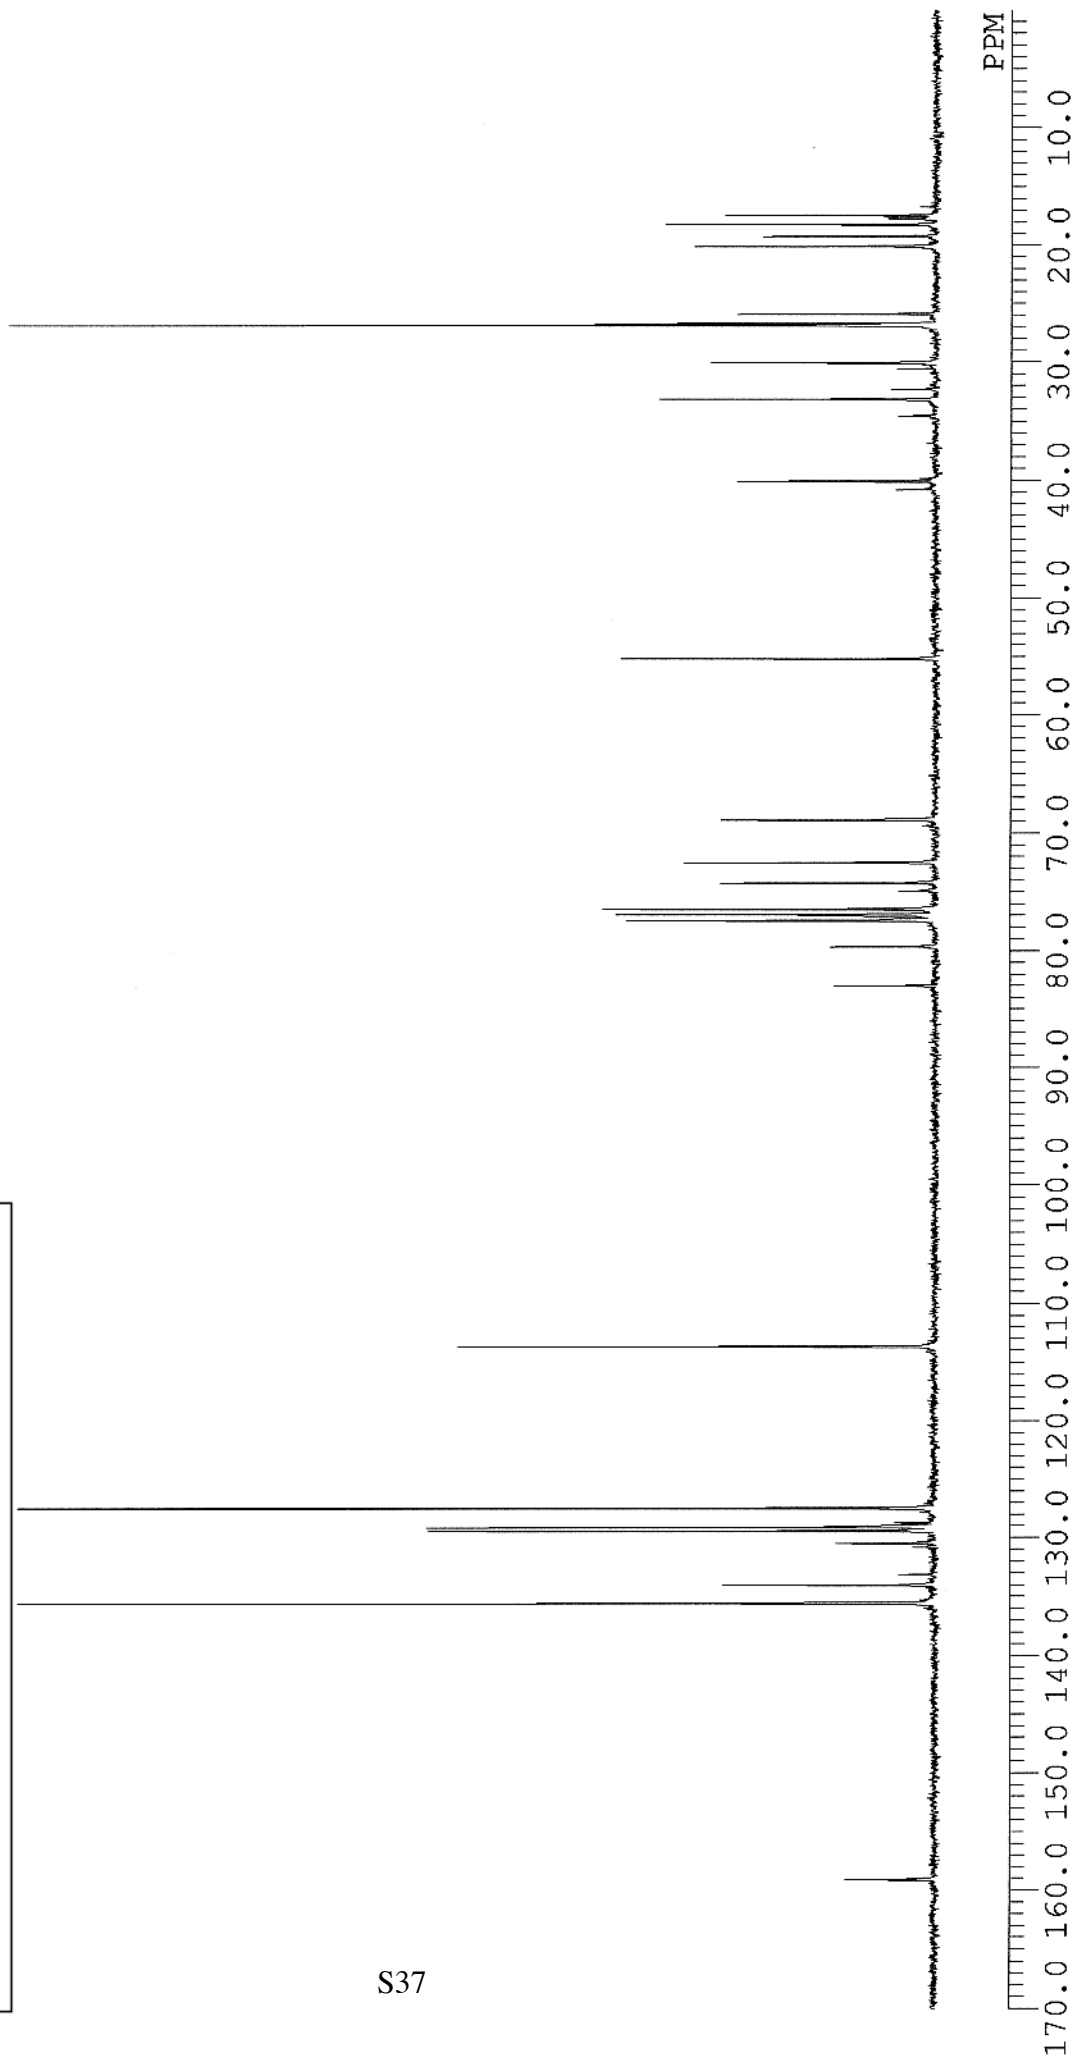

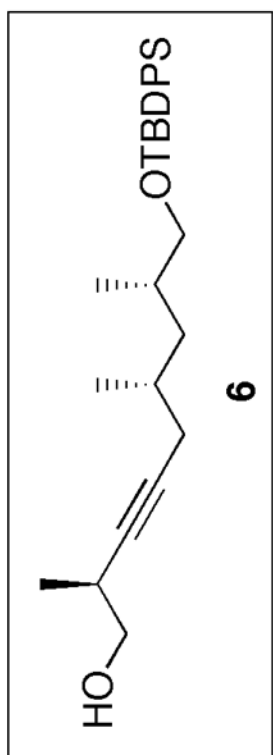

S38

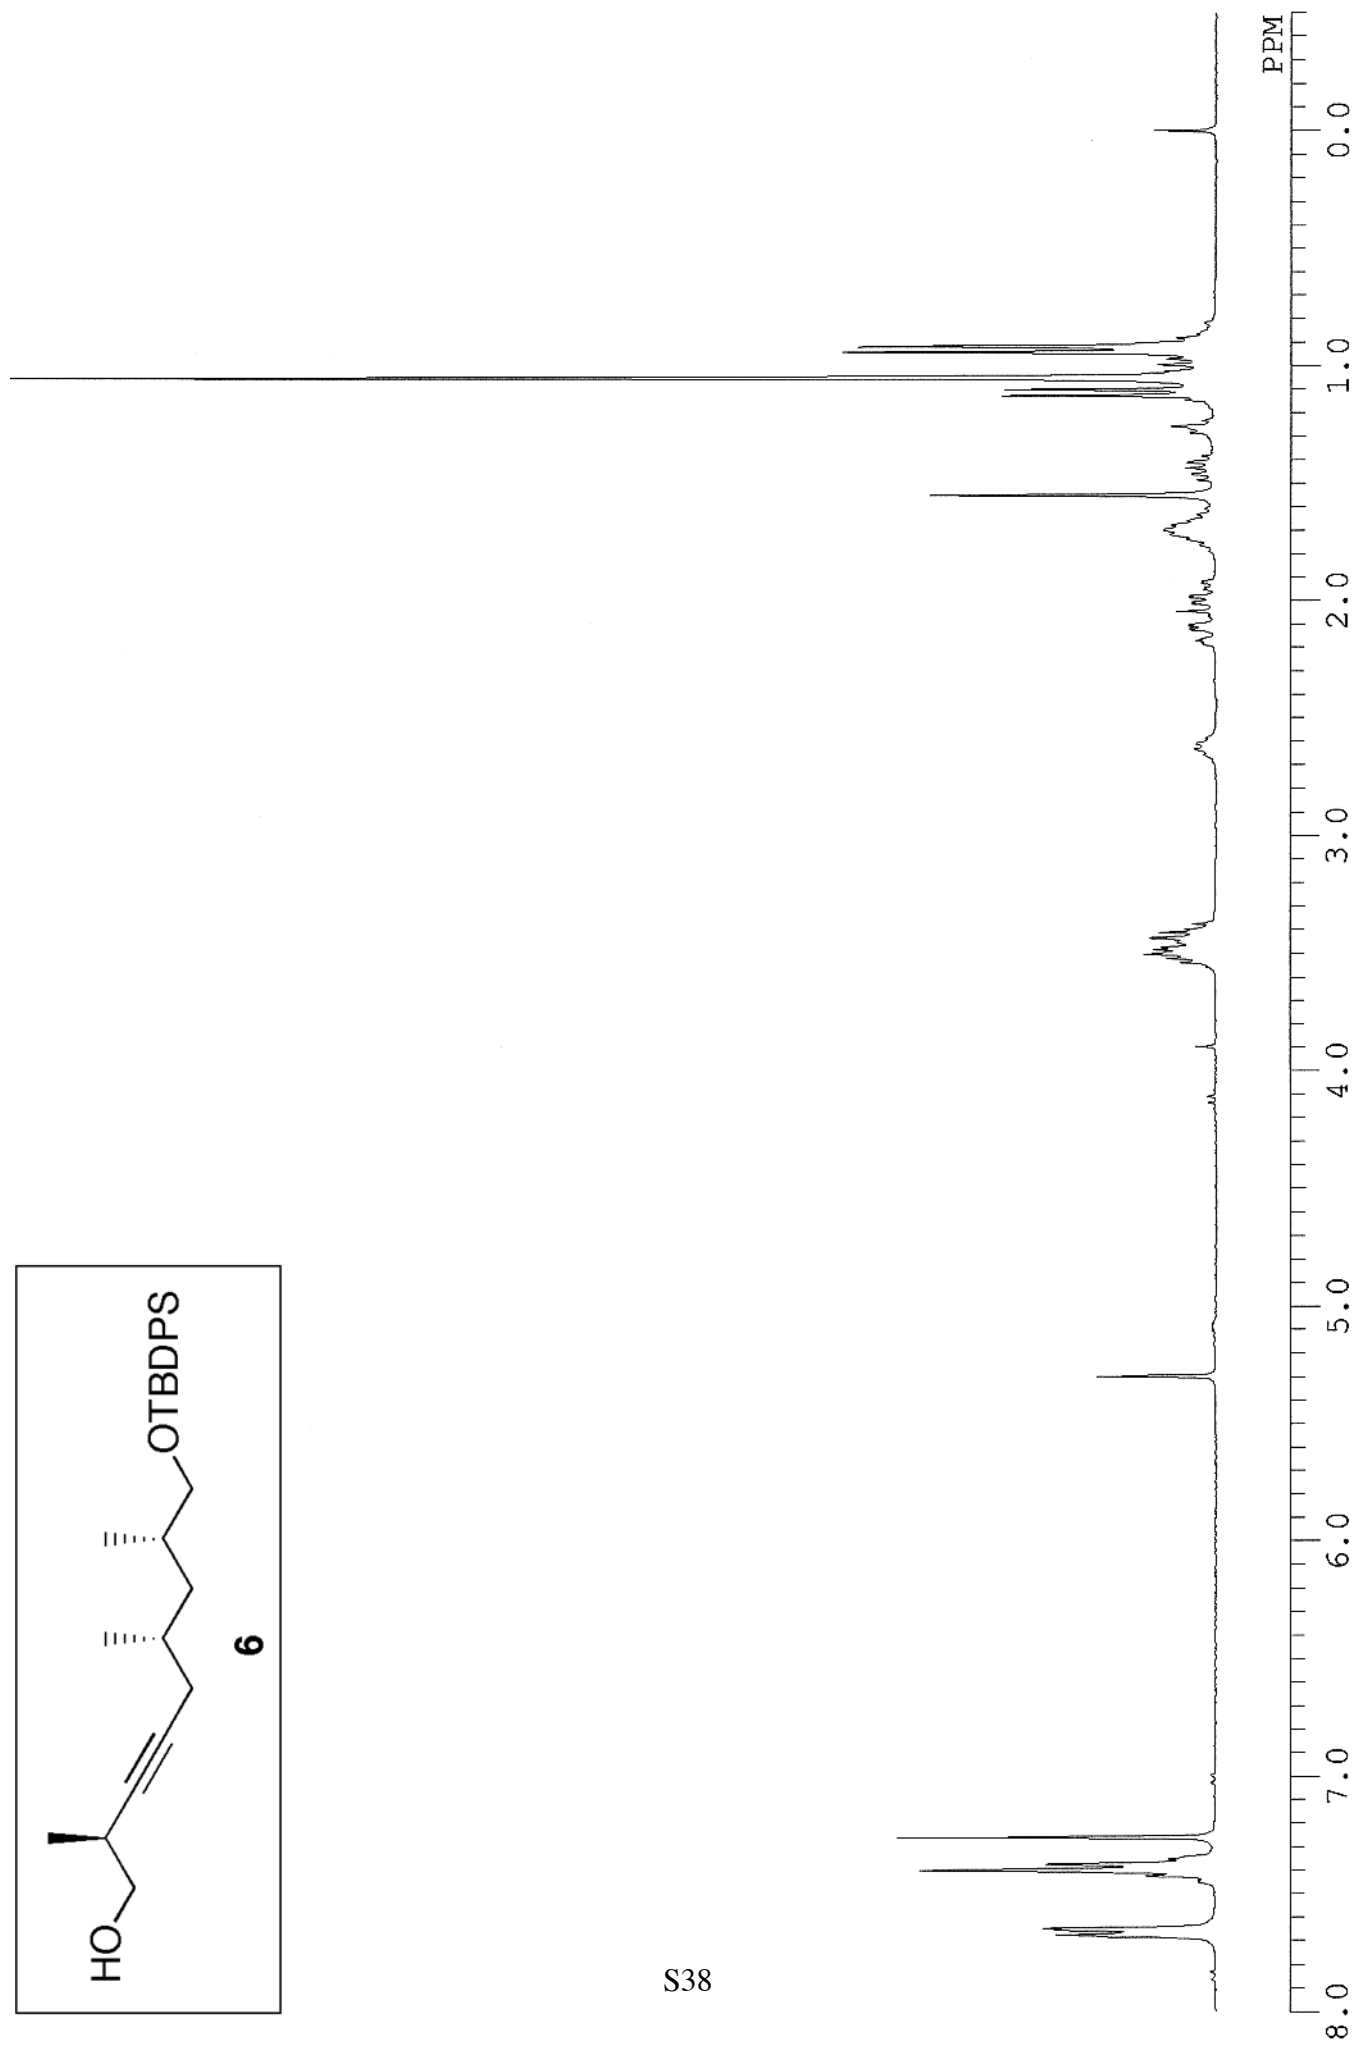

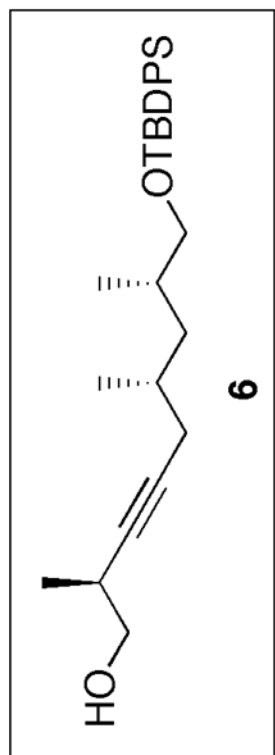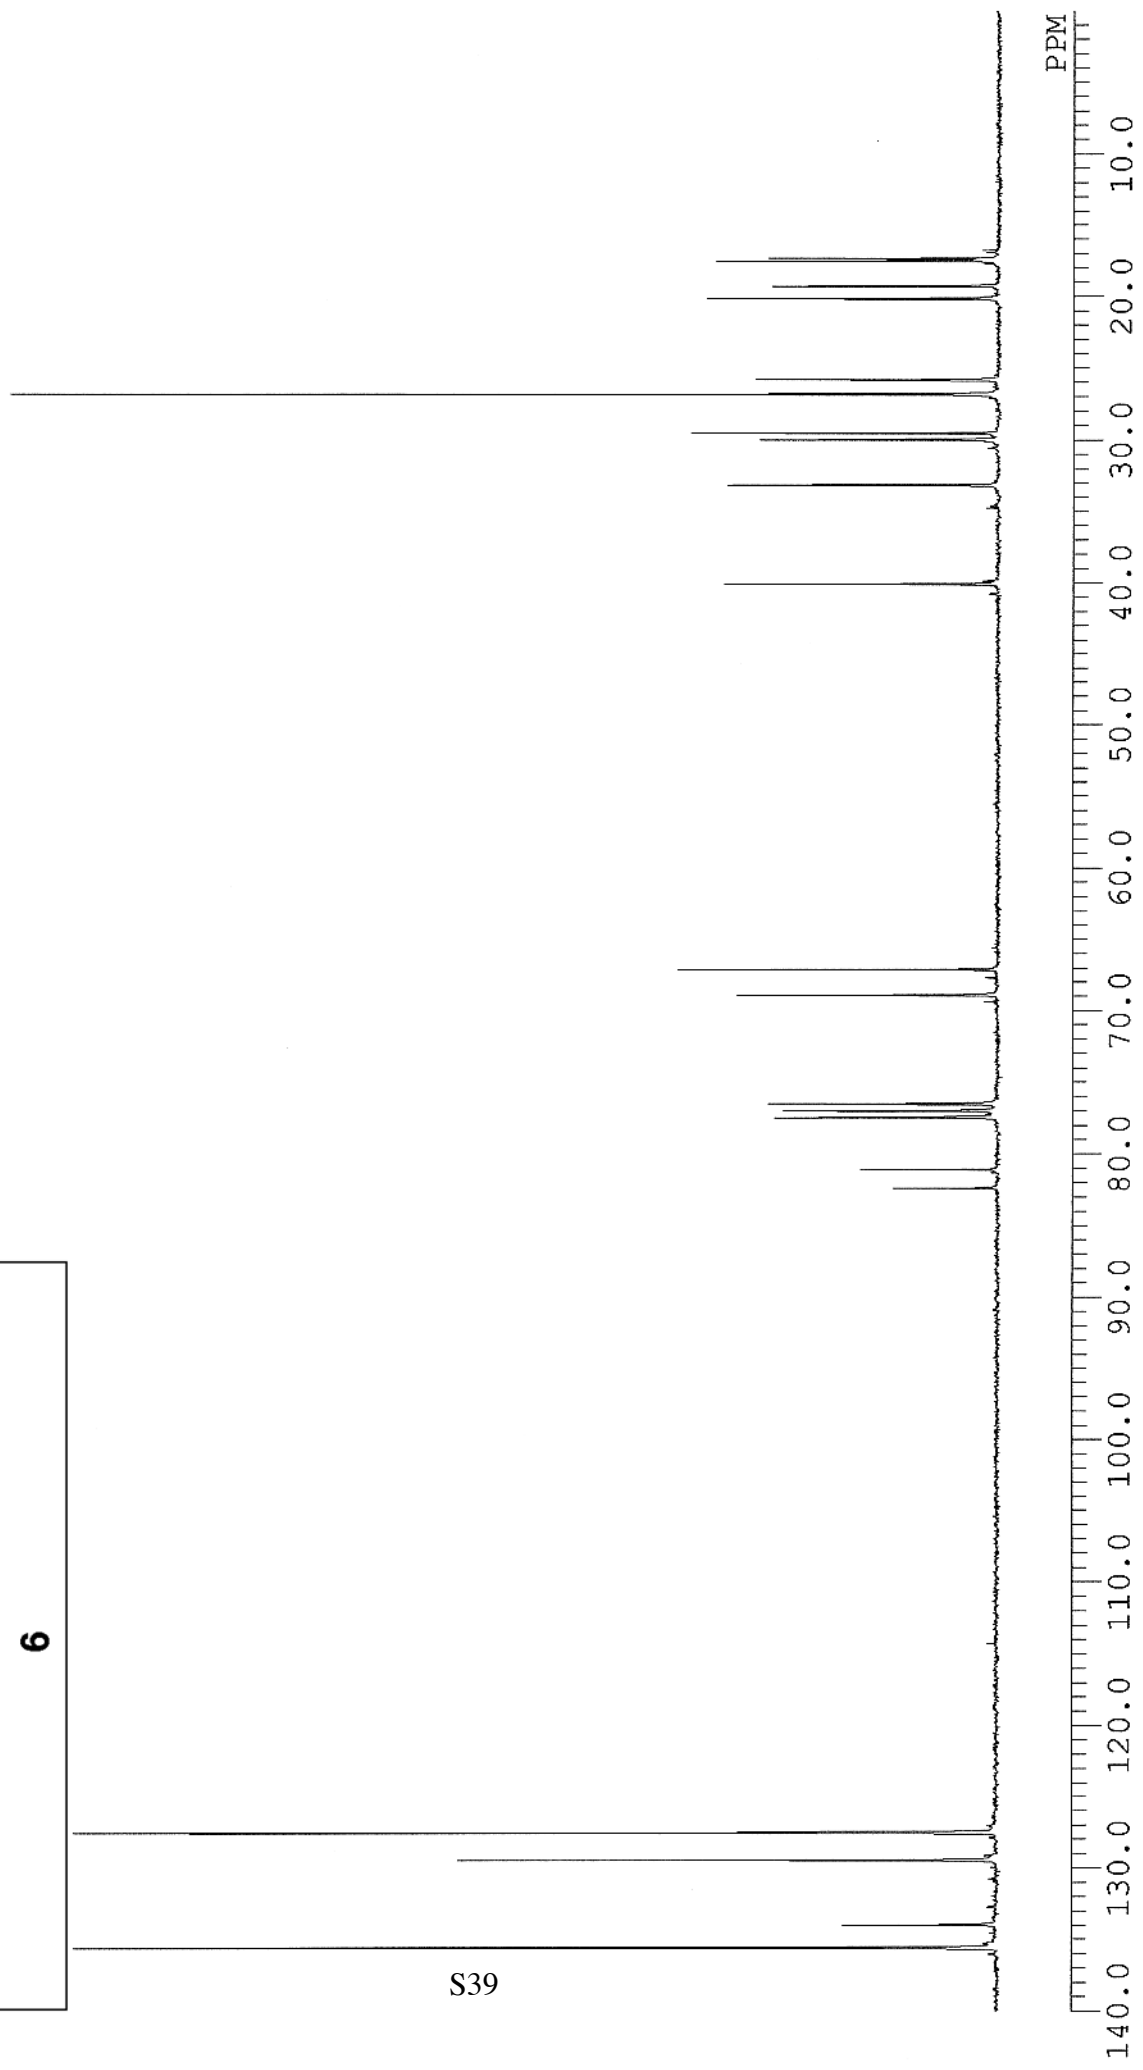

S39

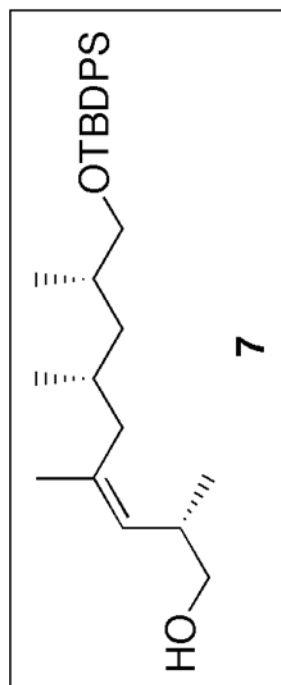

S40

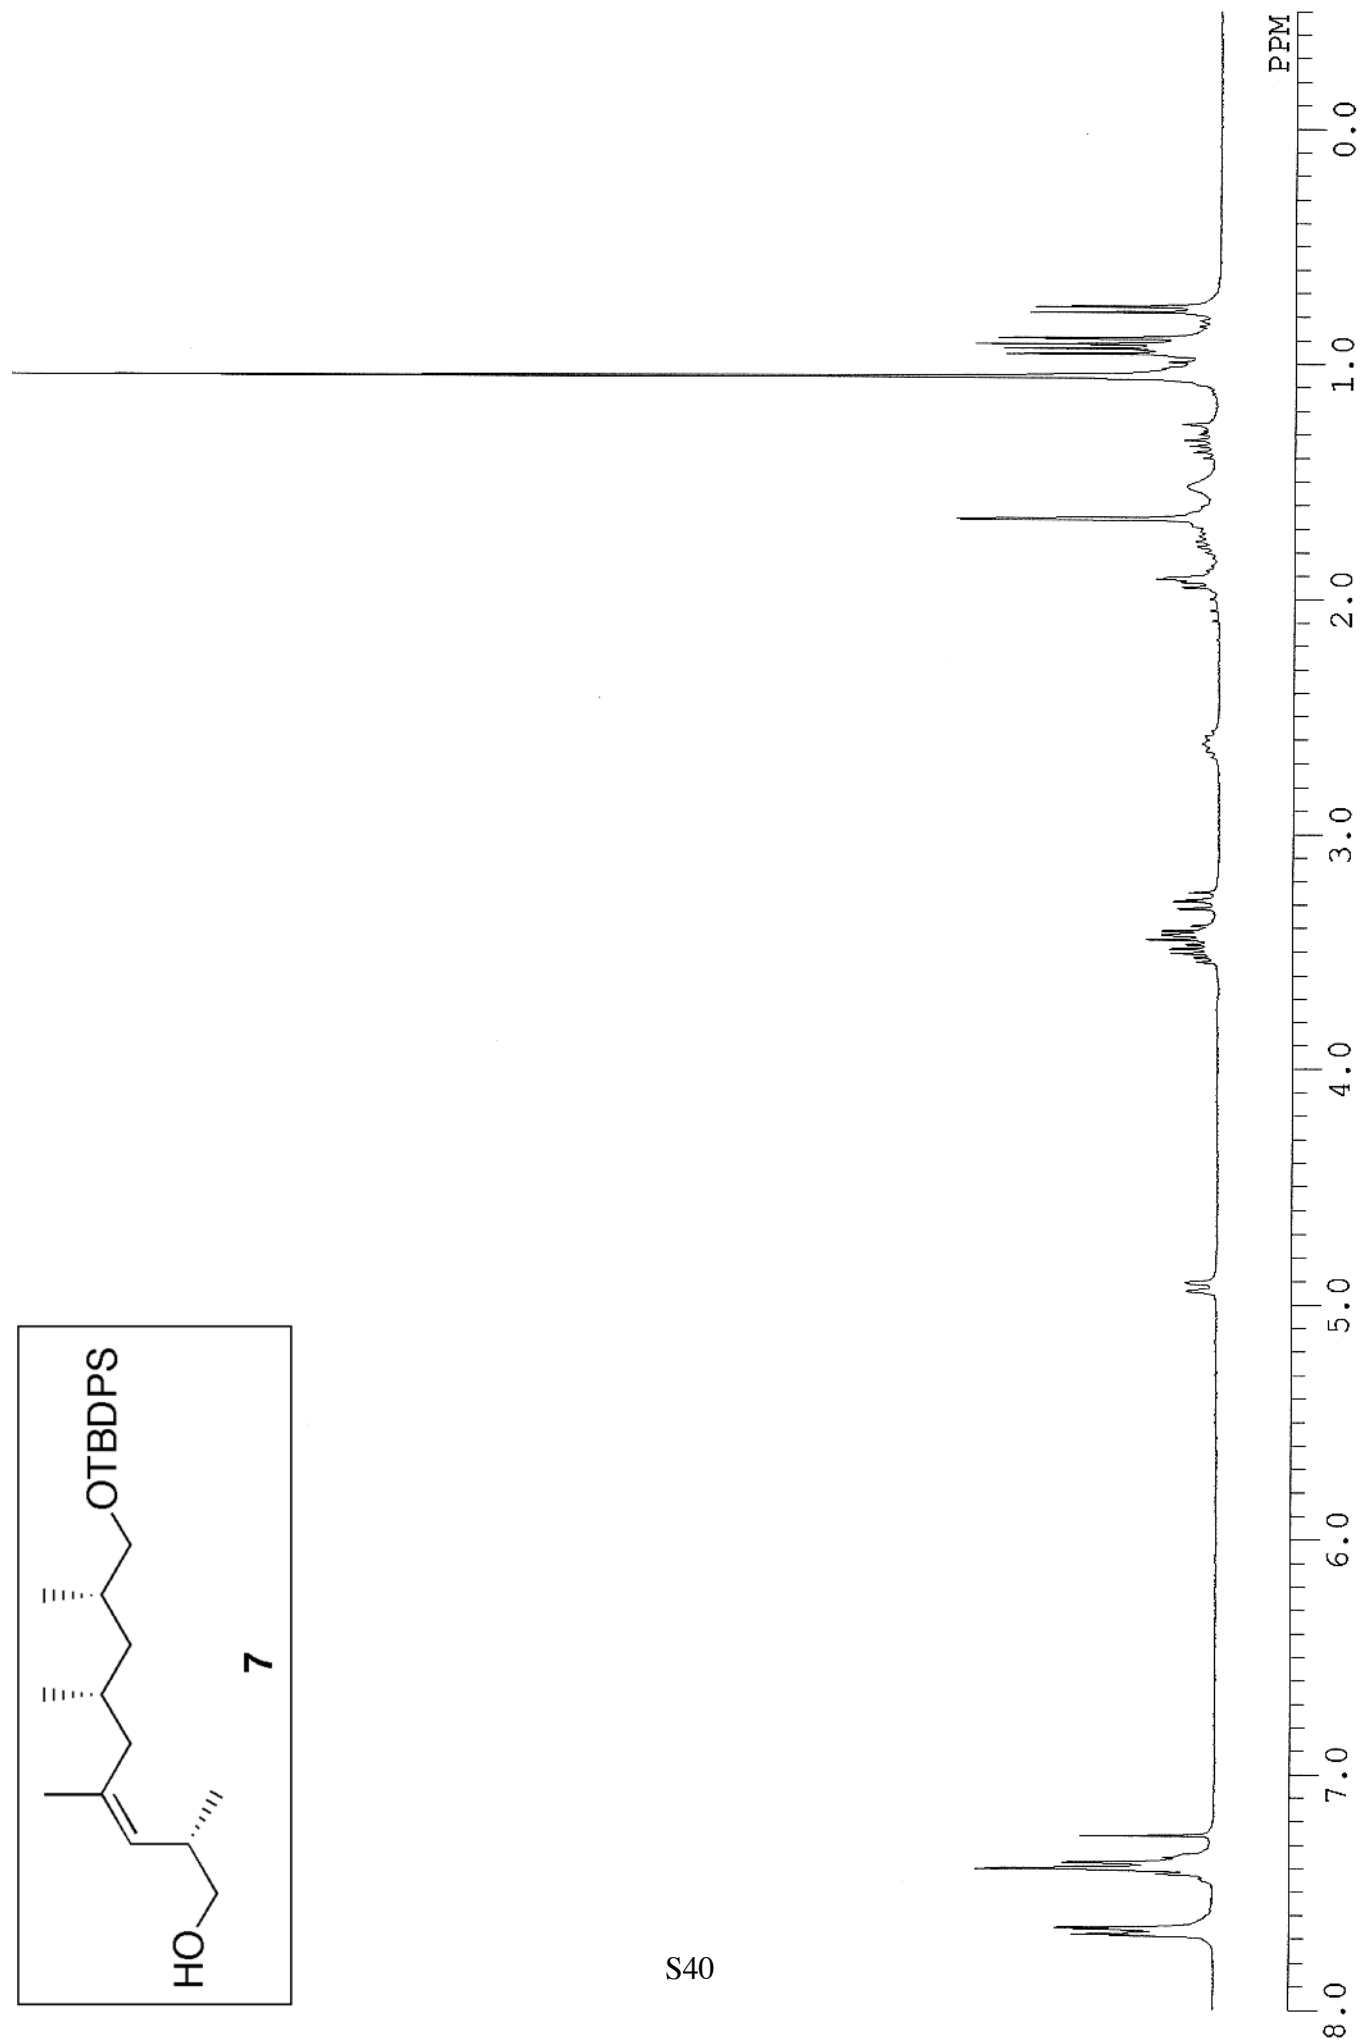



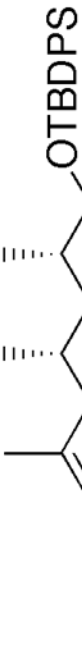

S41

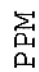

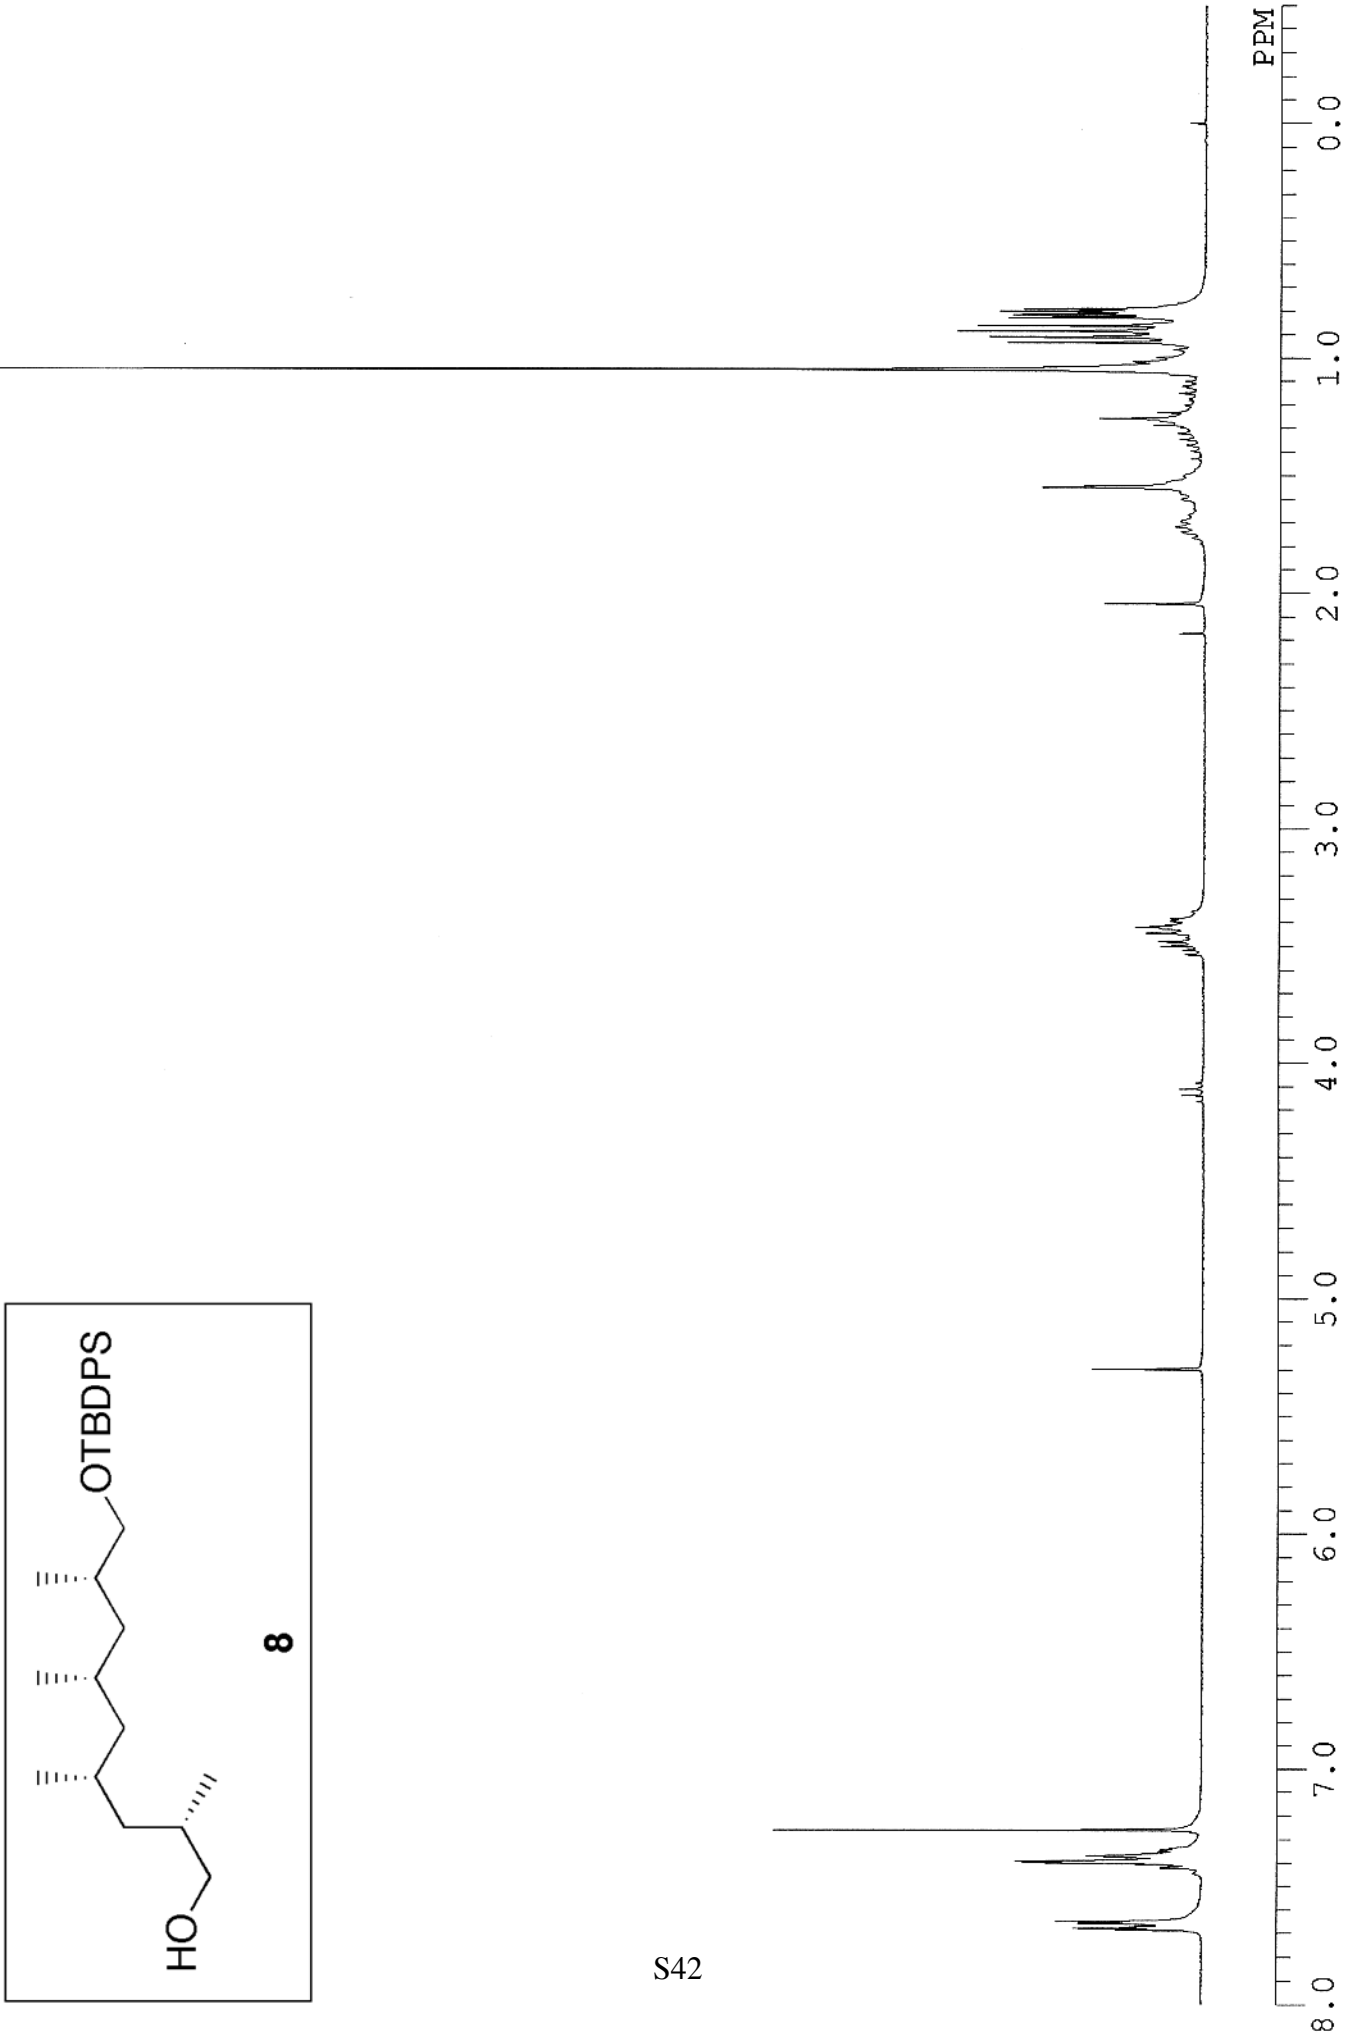

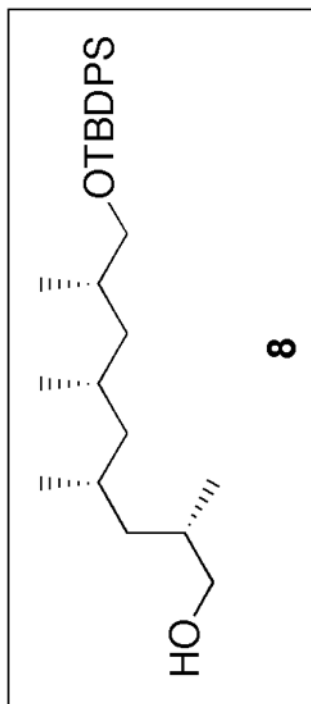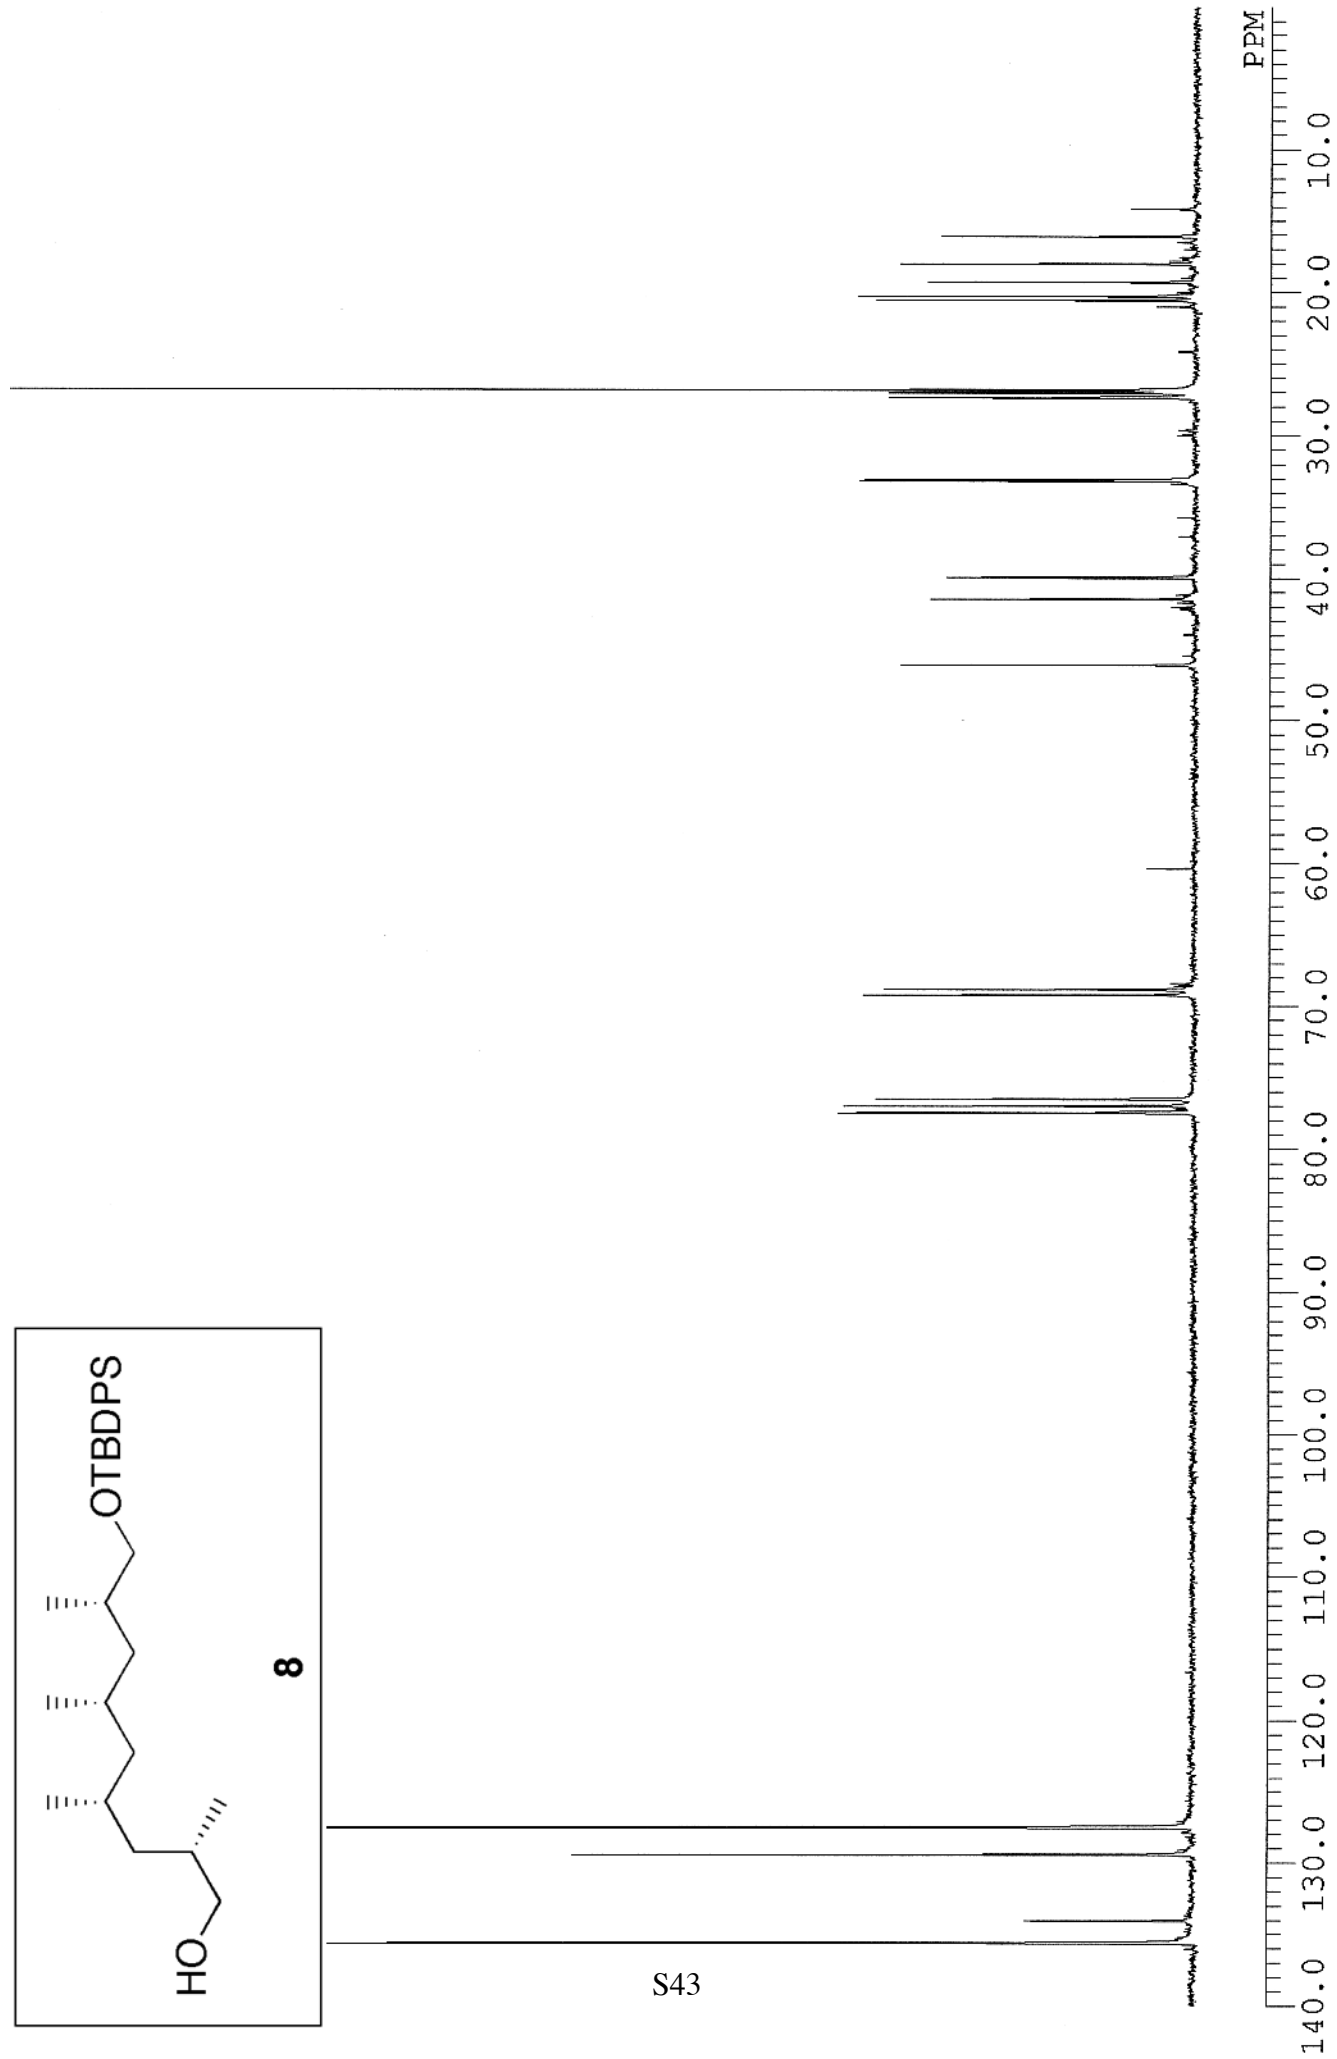

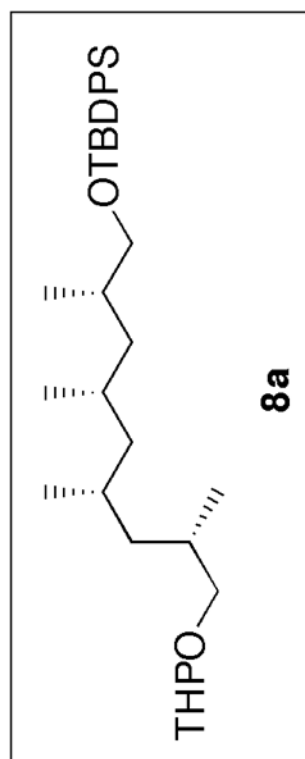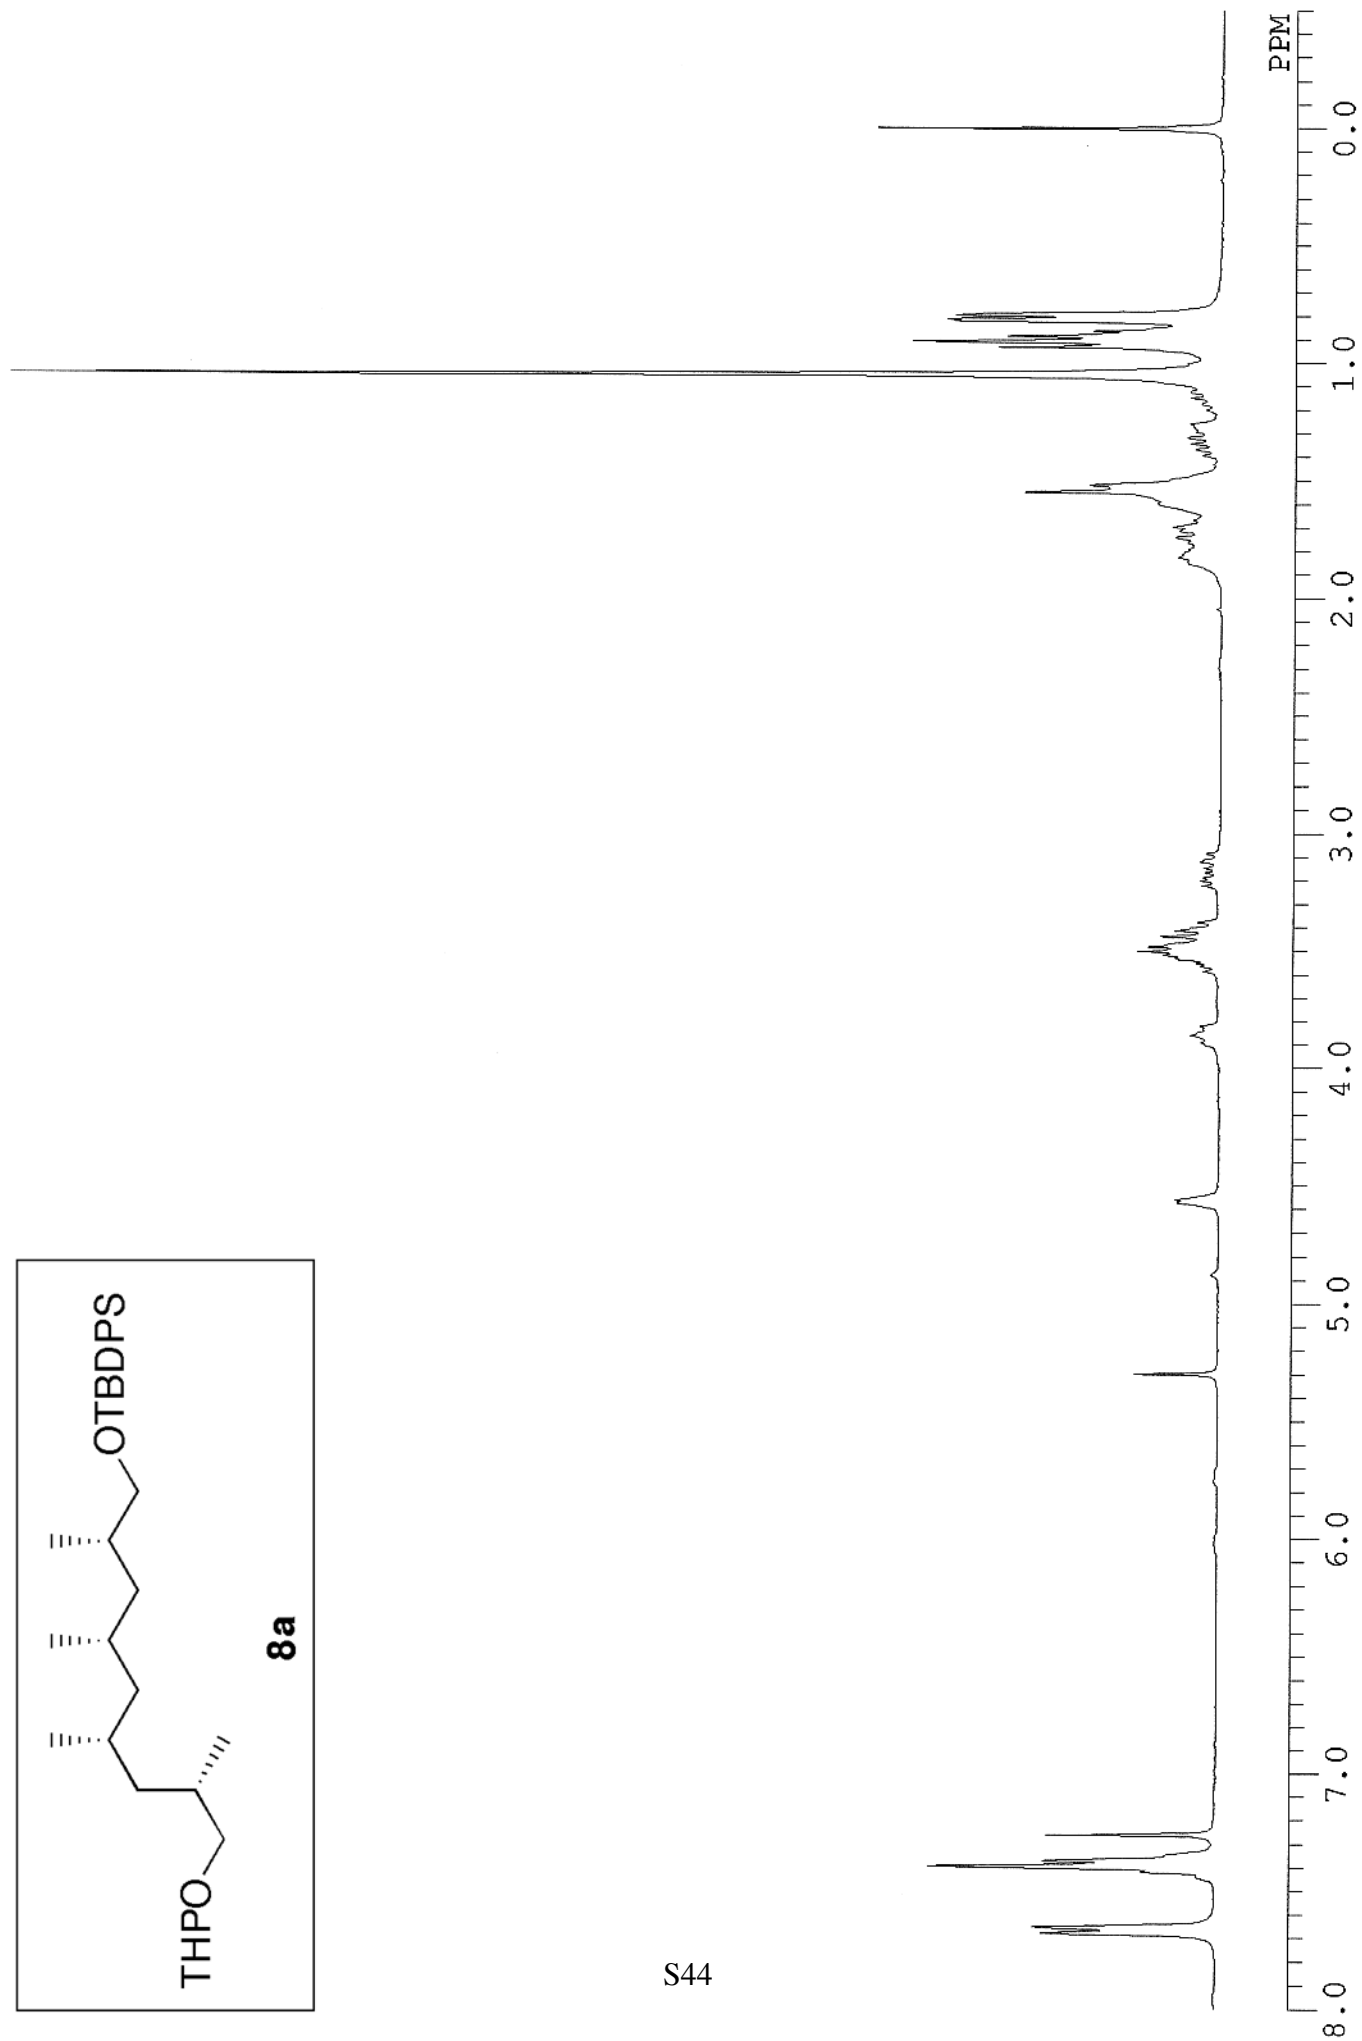

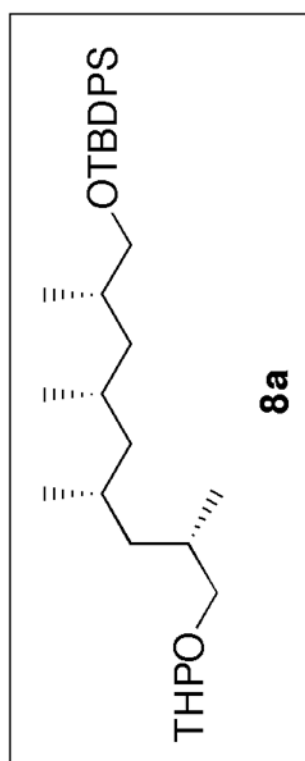

89

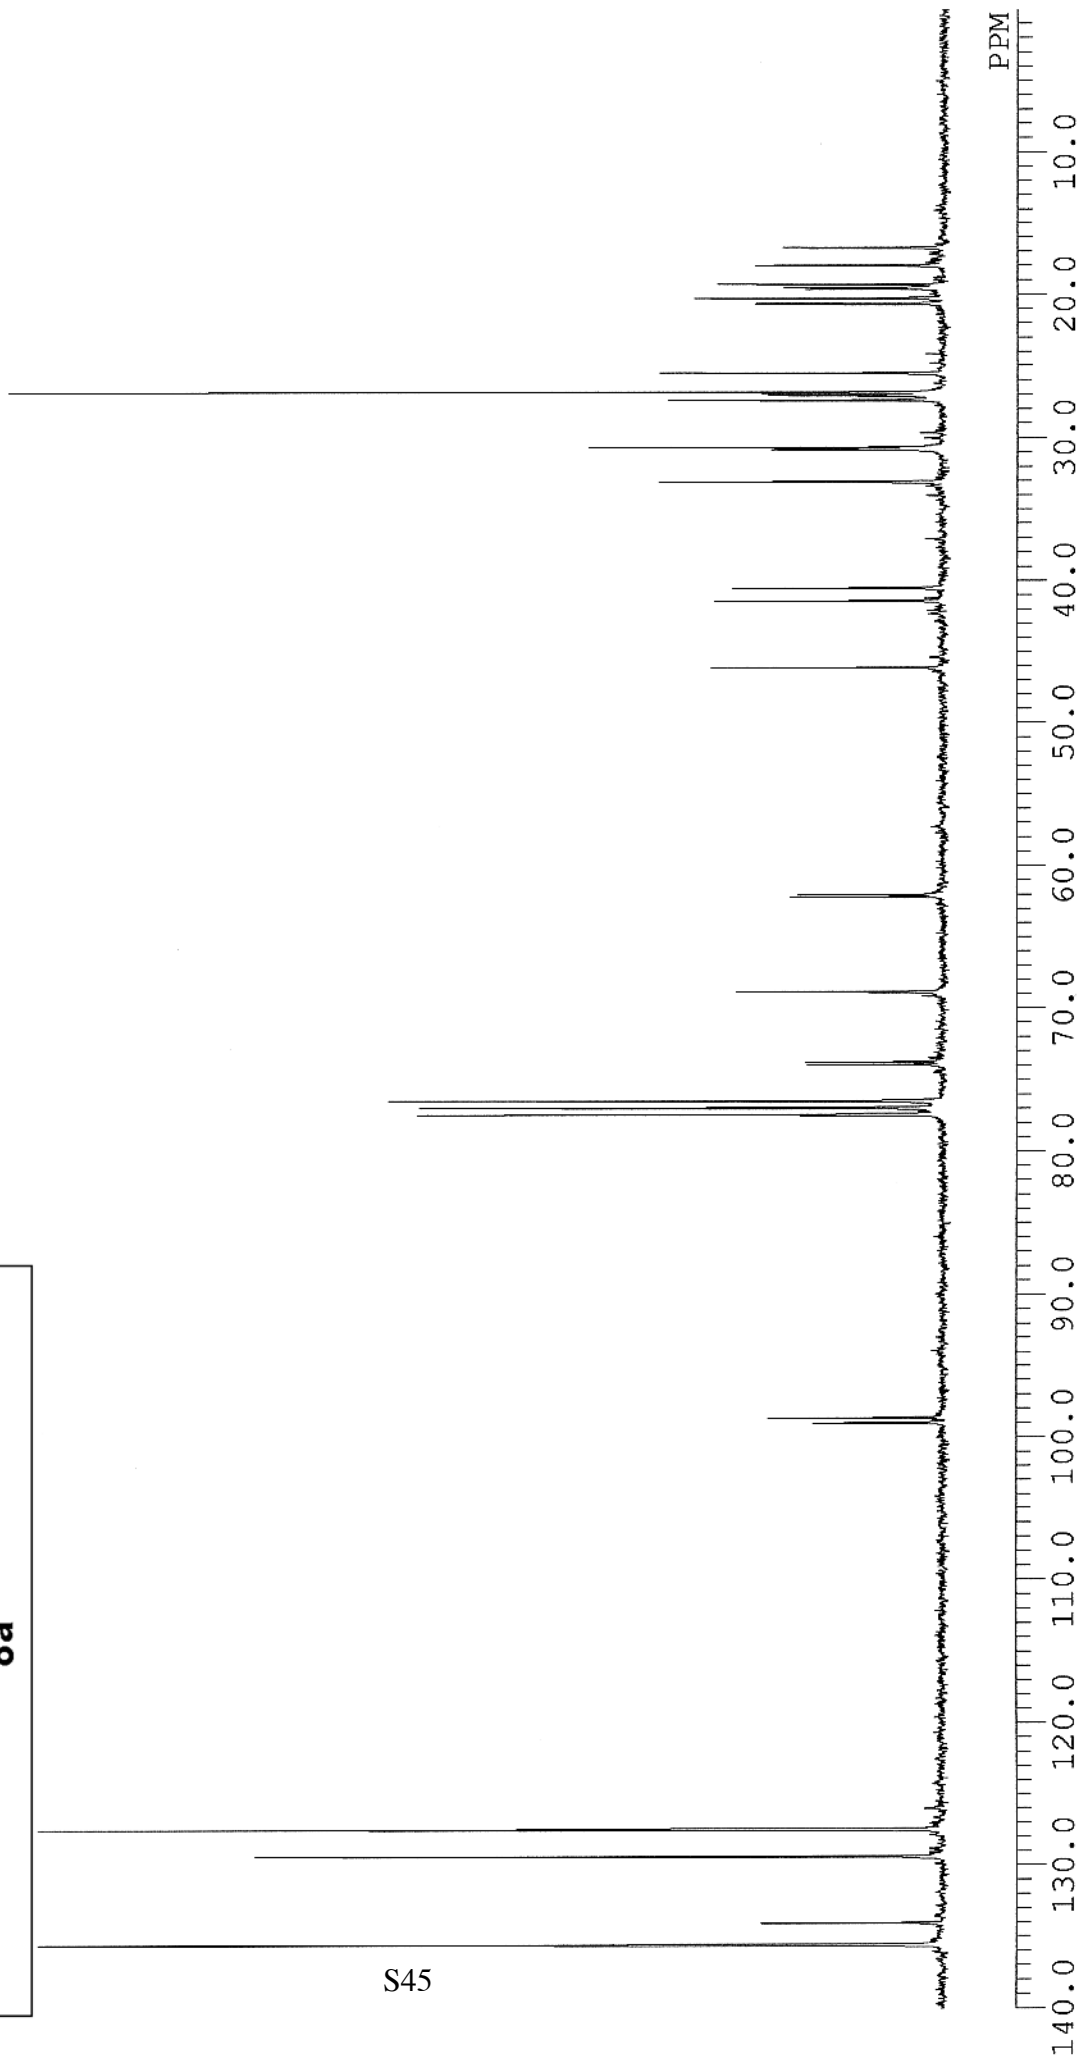

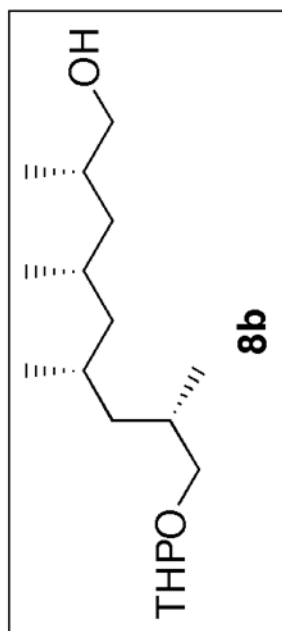

S46

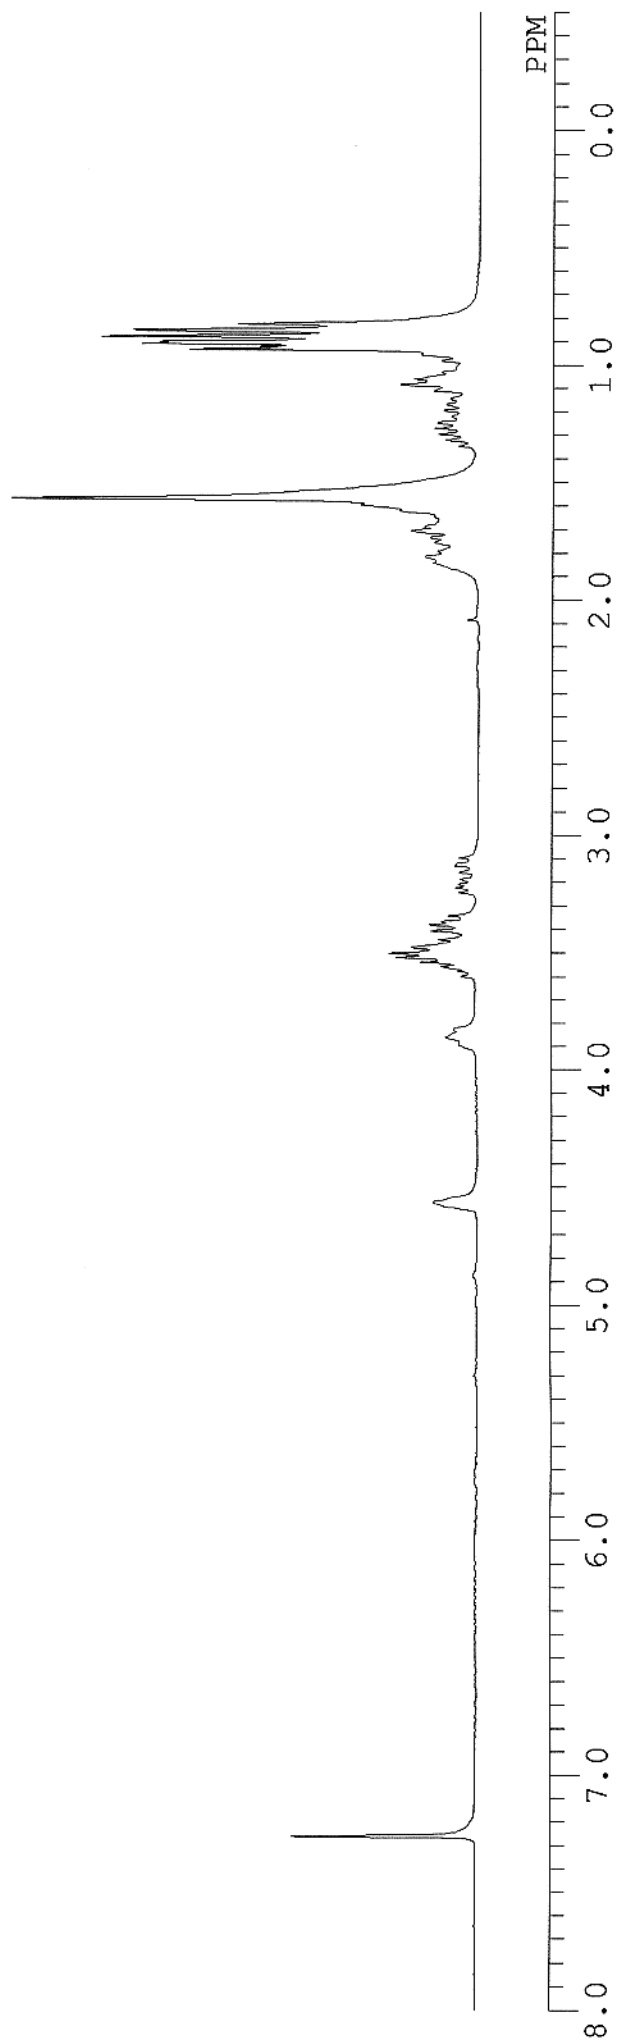

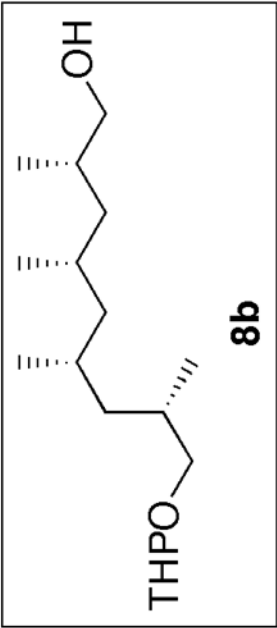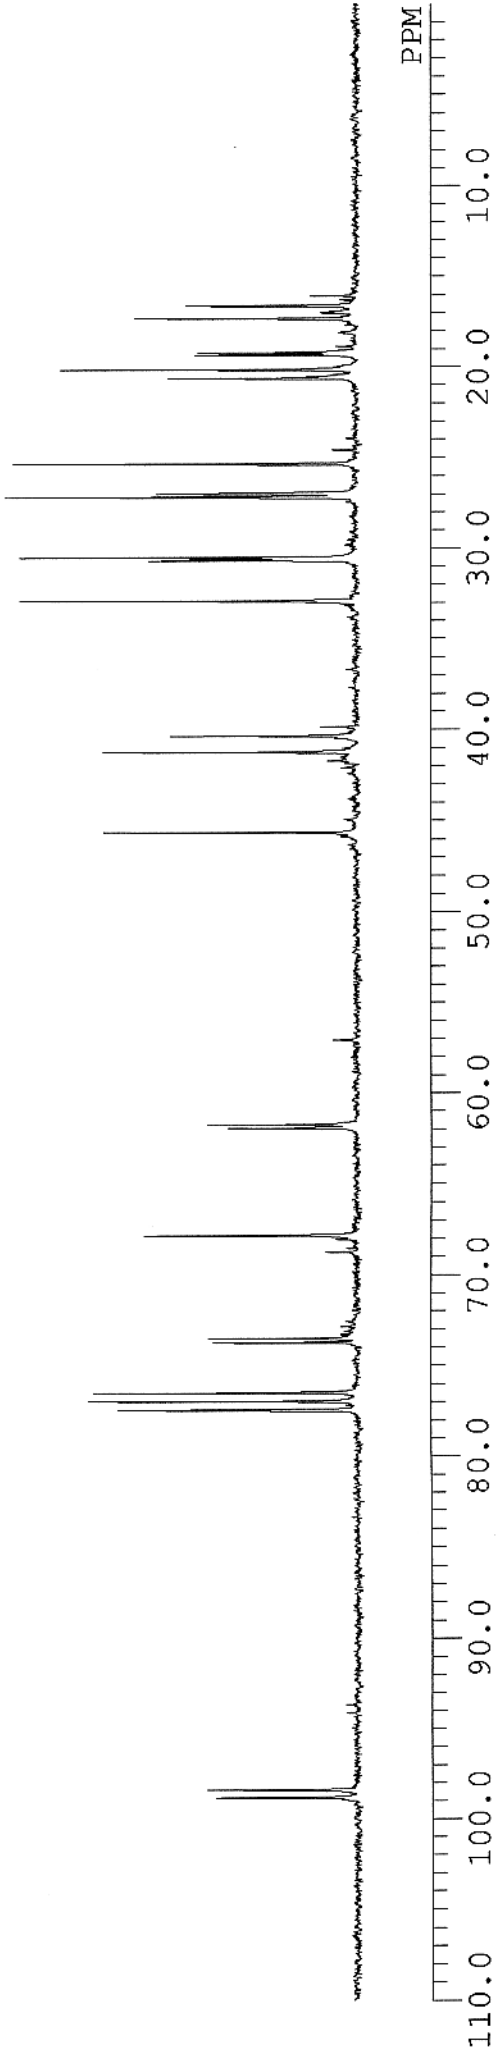

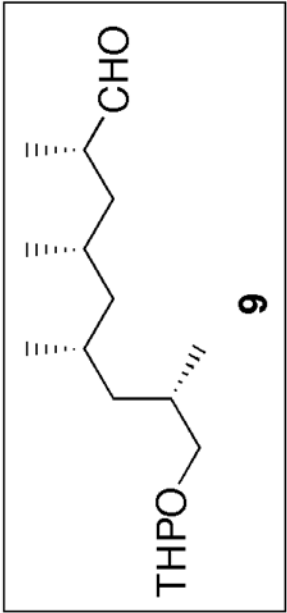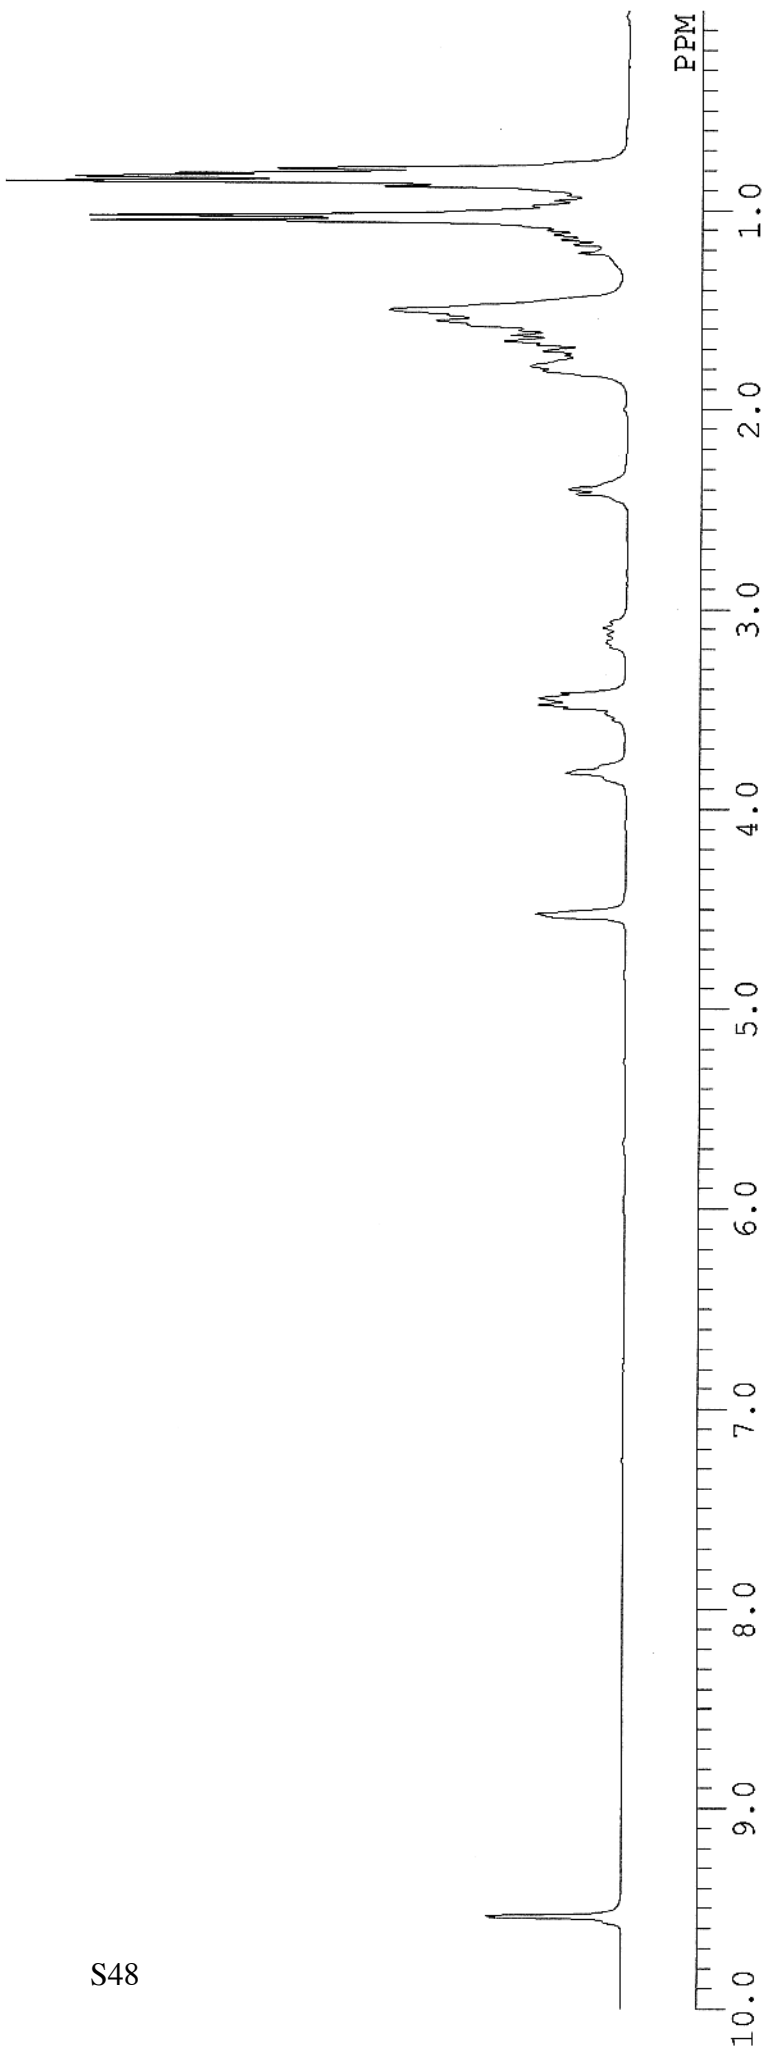



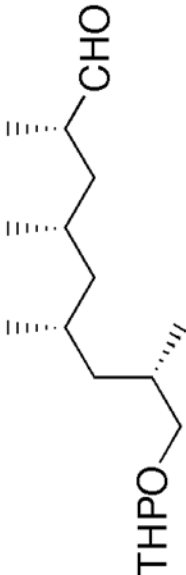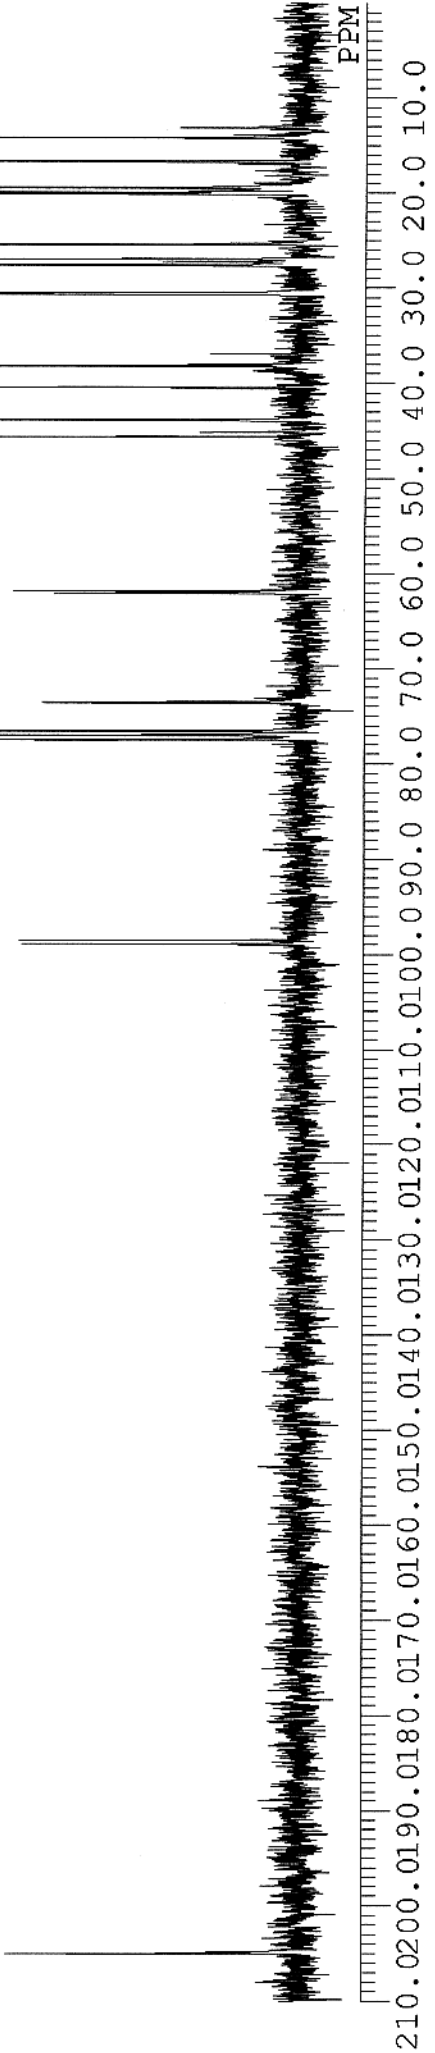

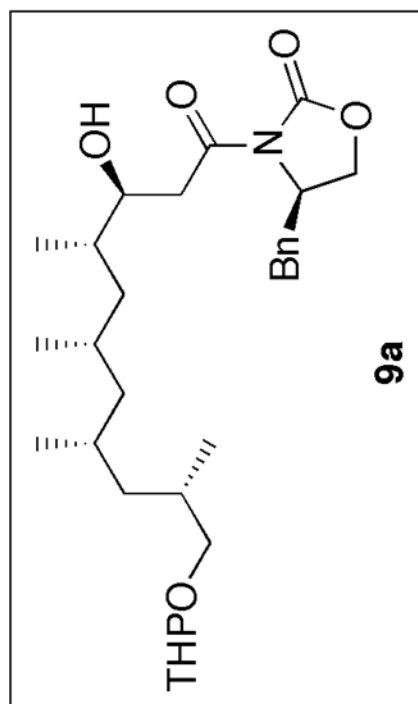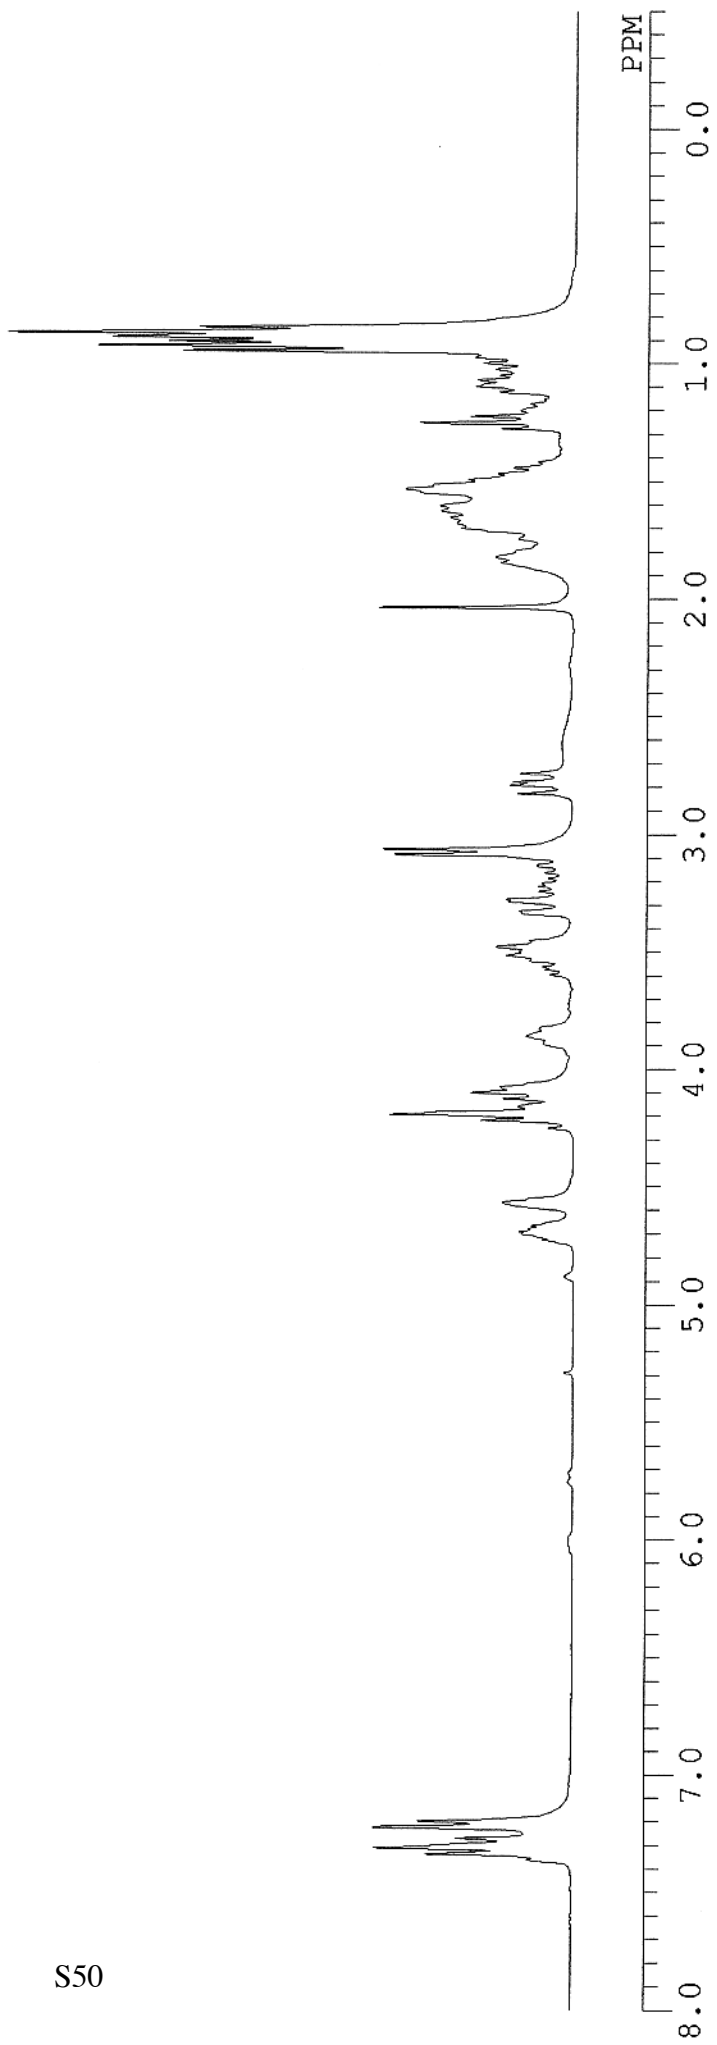

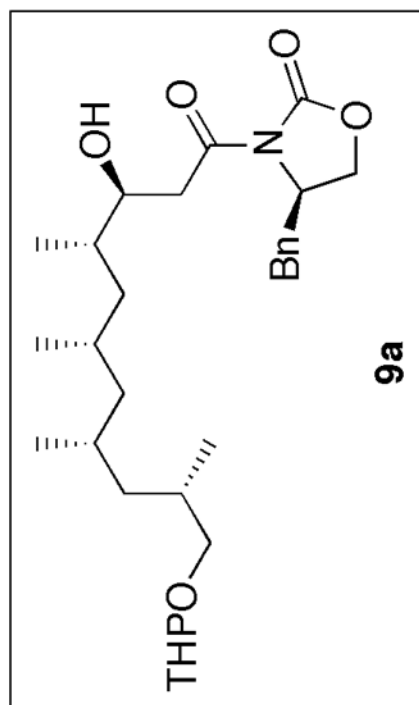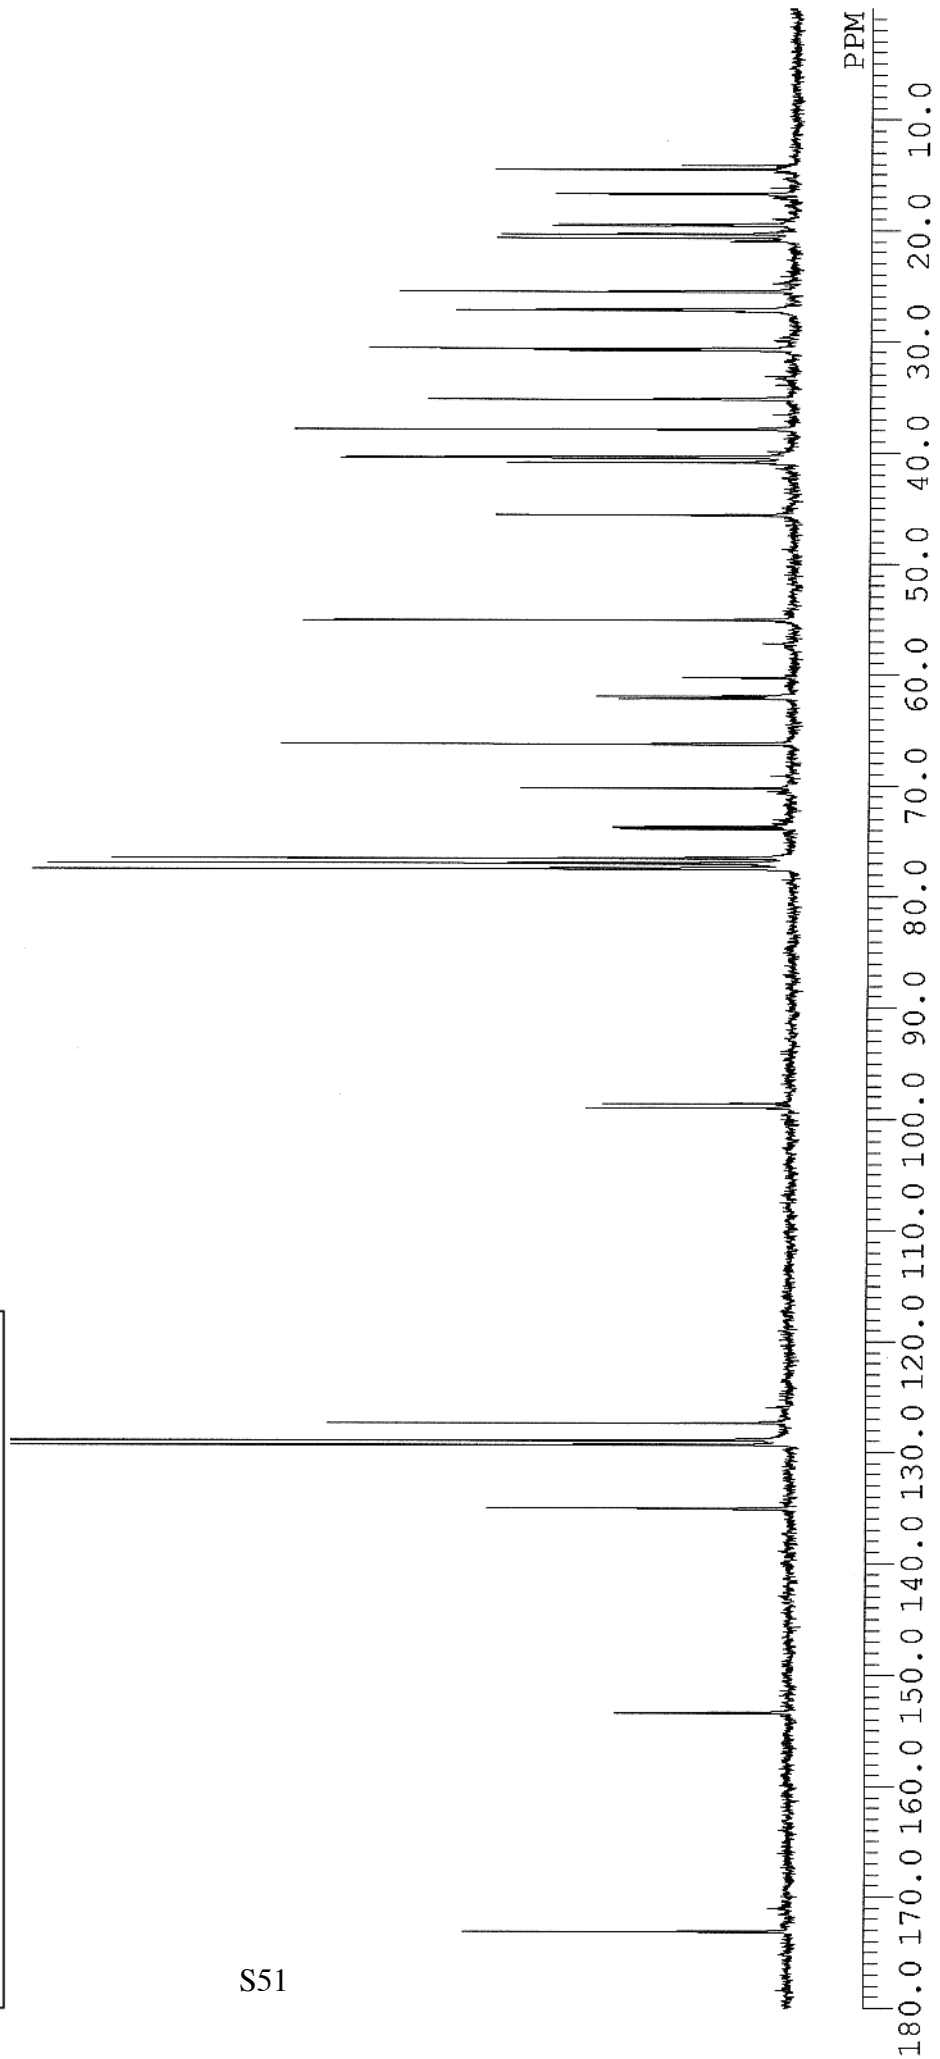

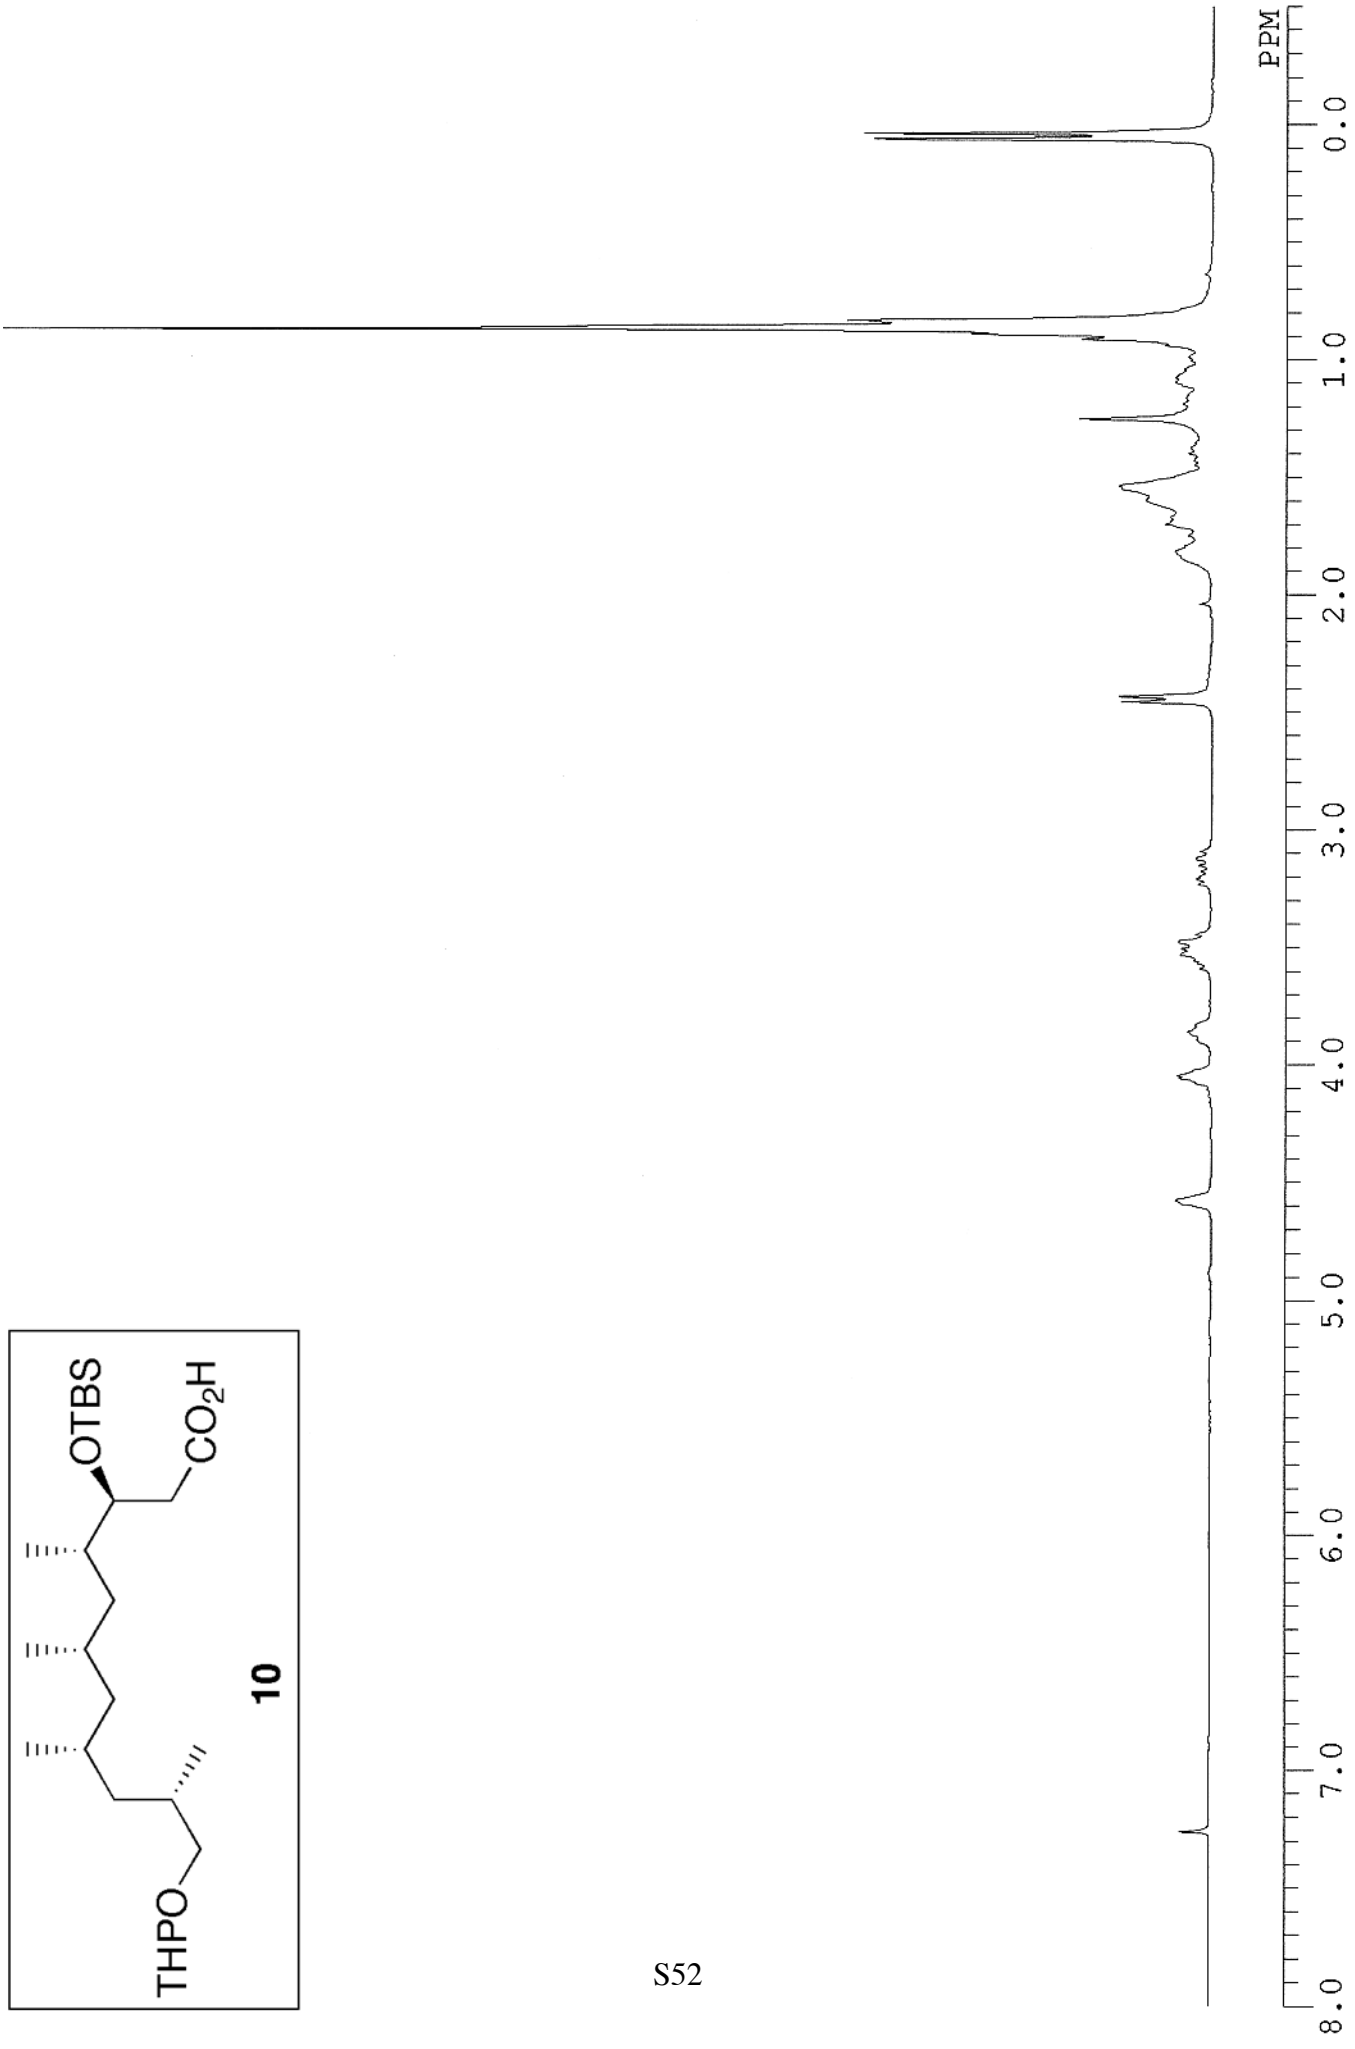



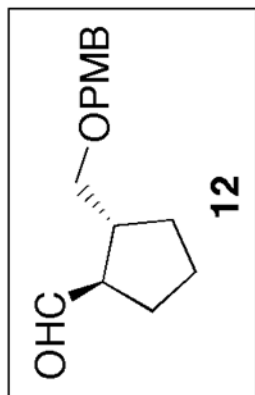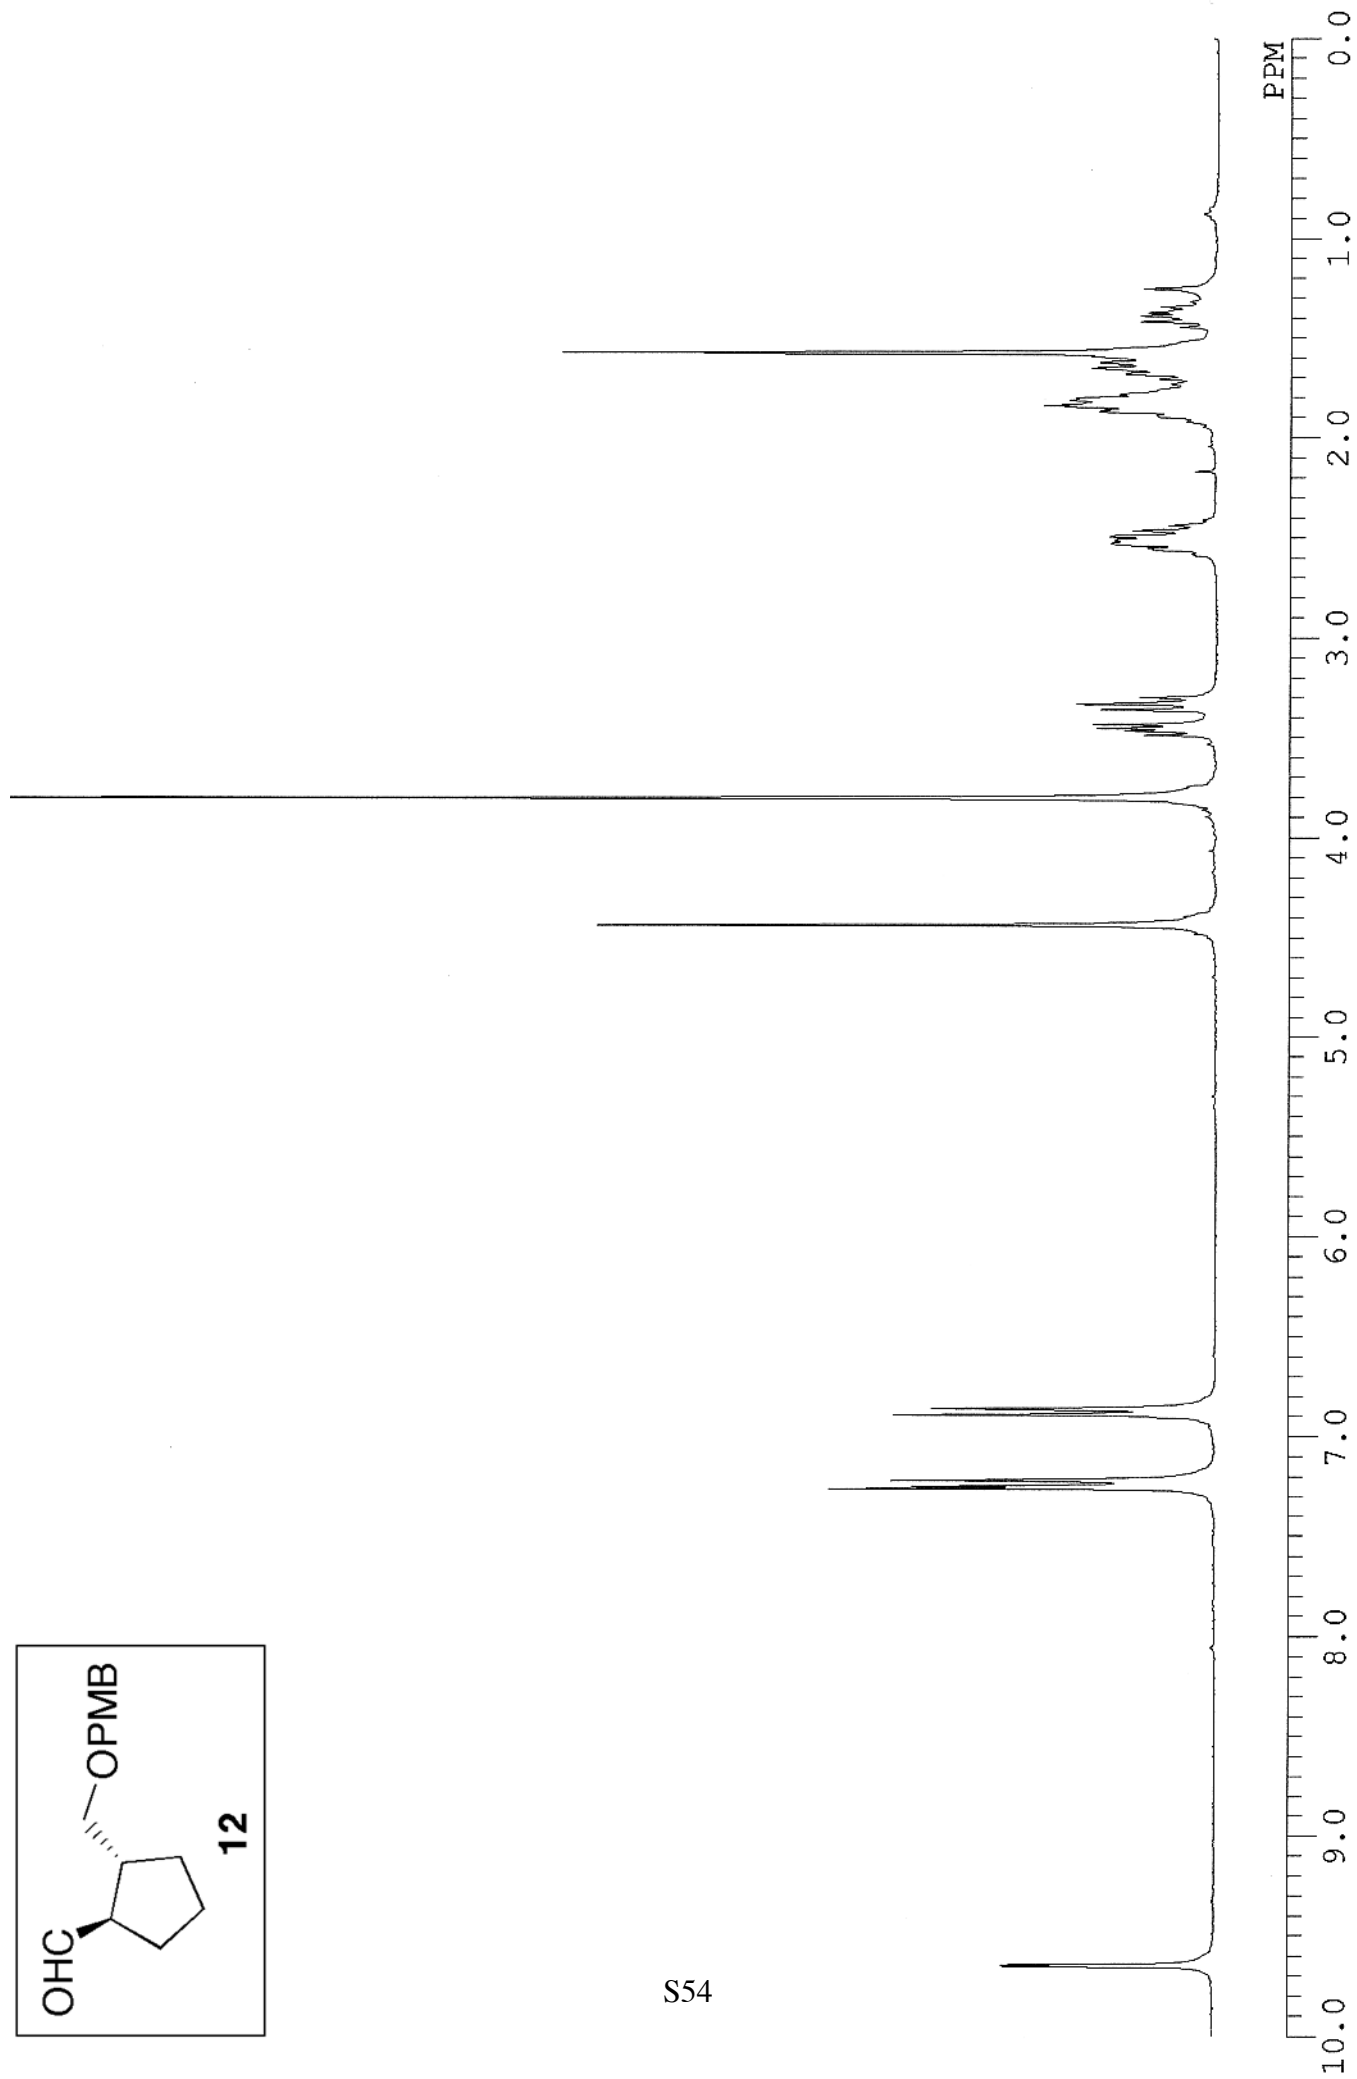

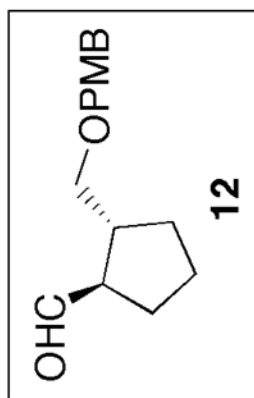

S55

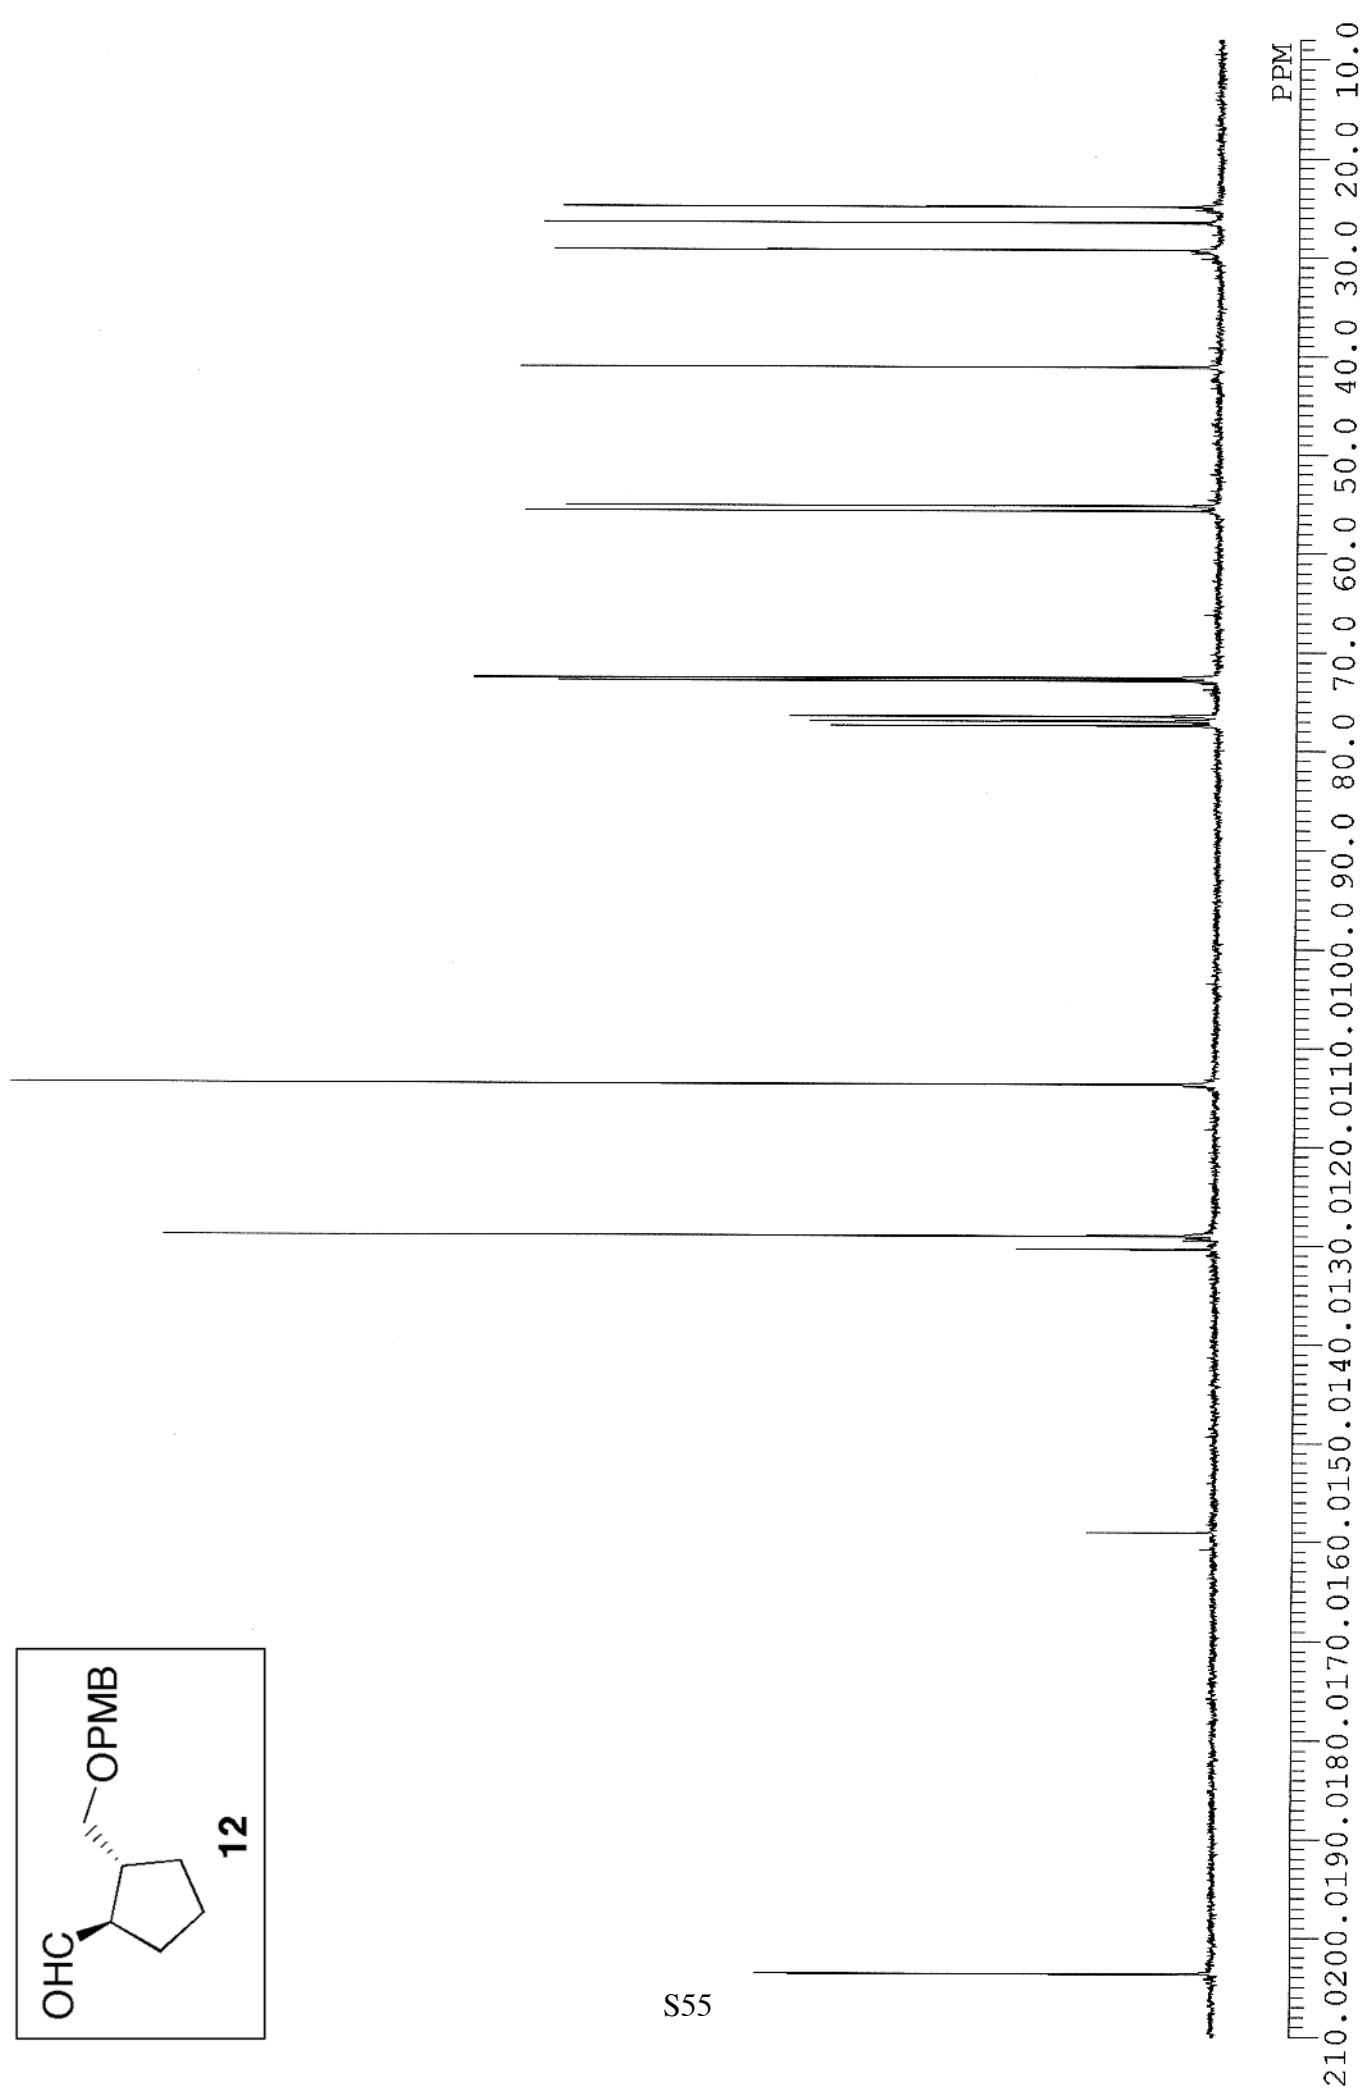

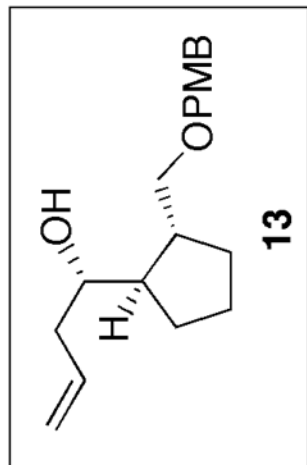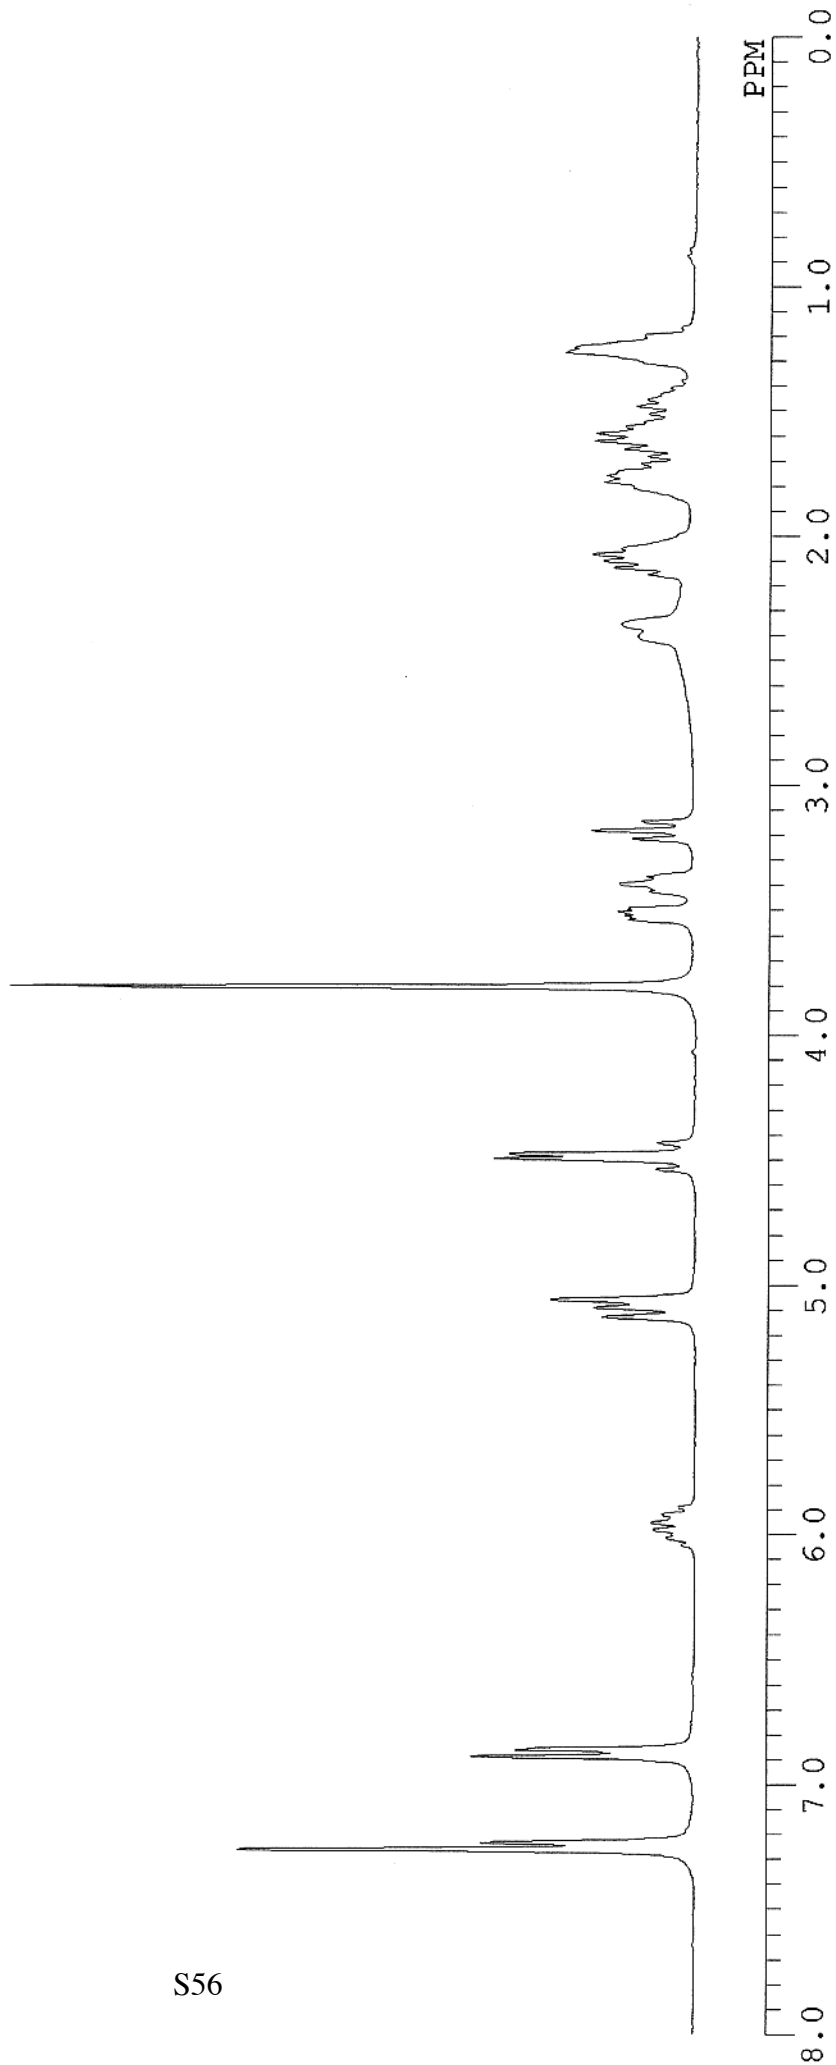



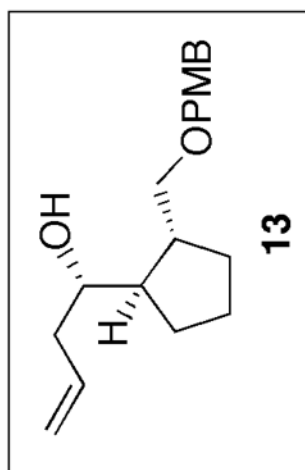

S57

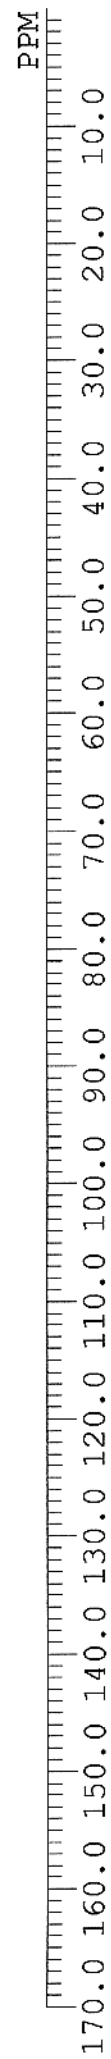

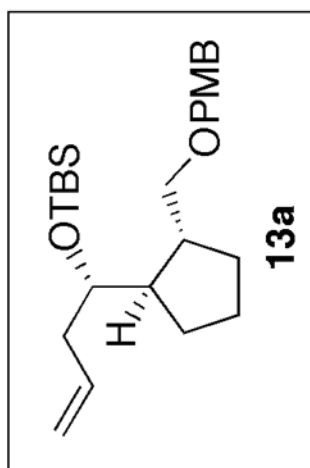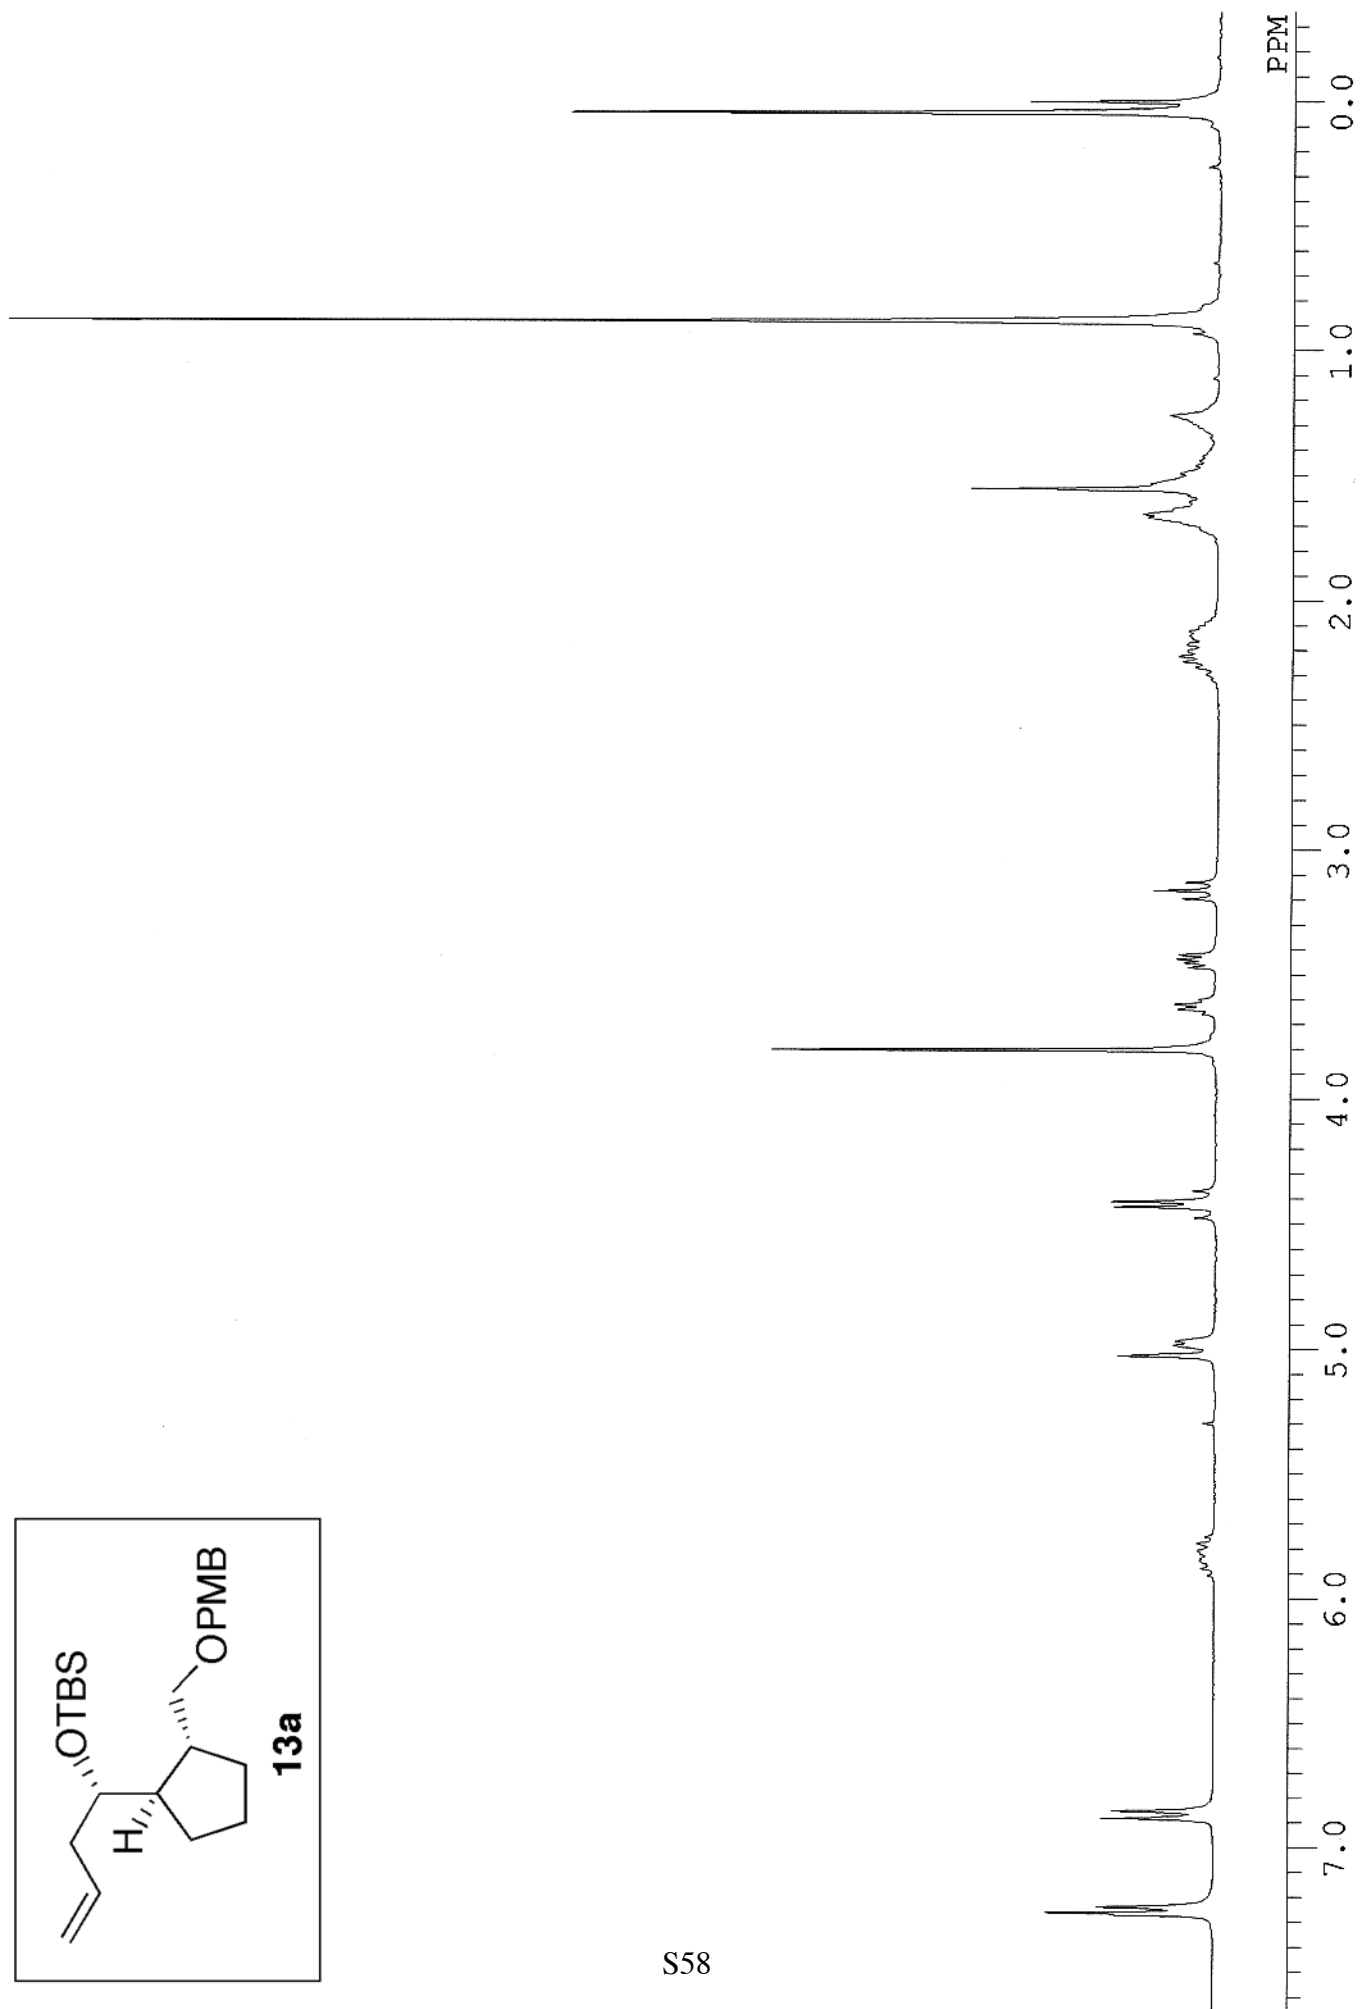

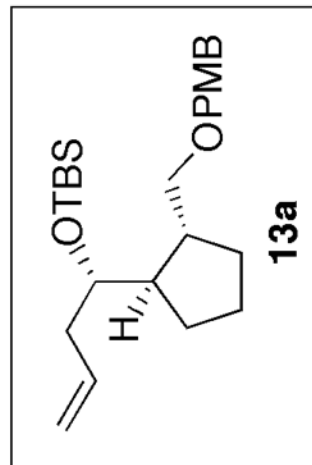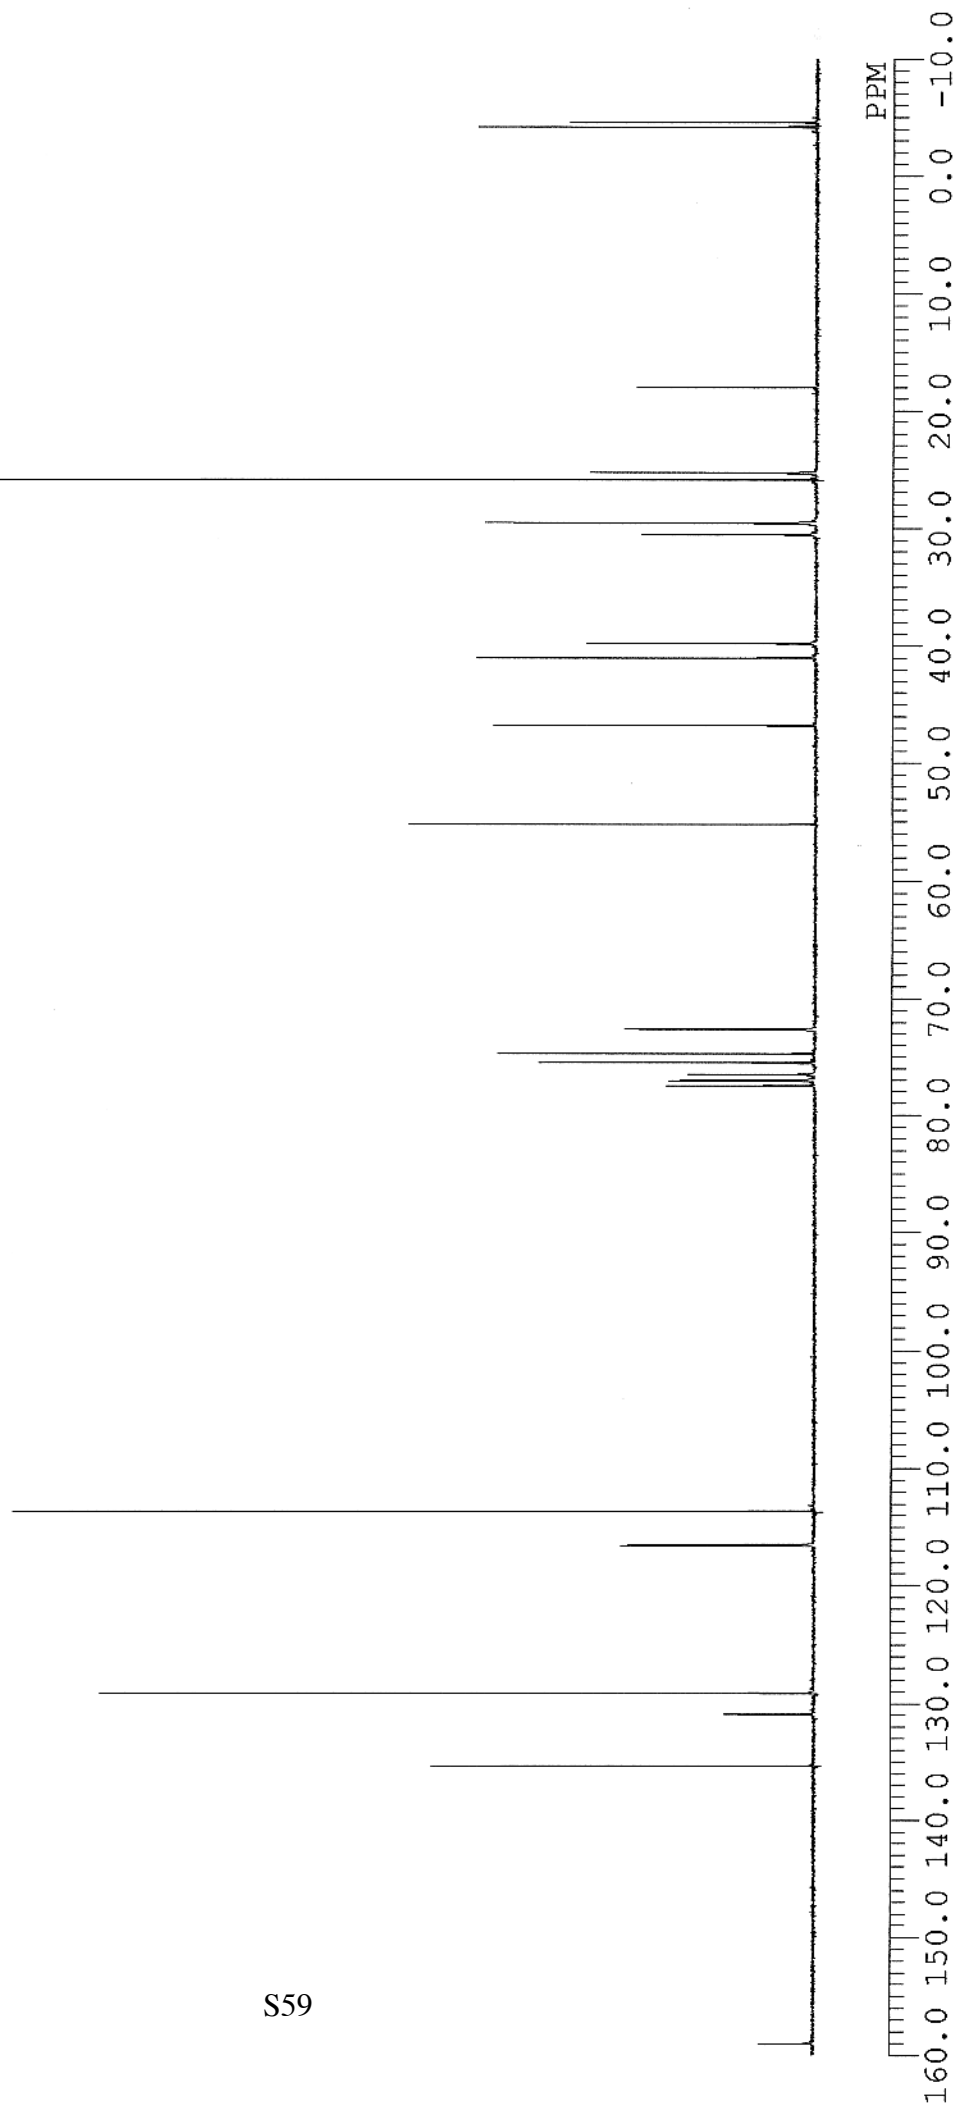

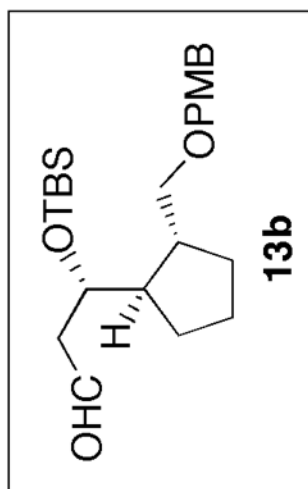

S60

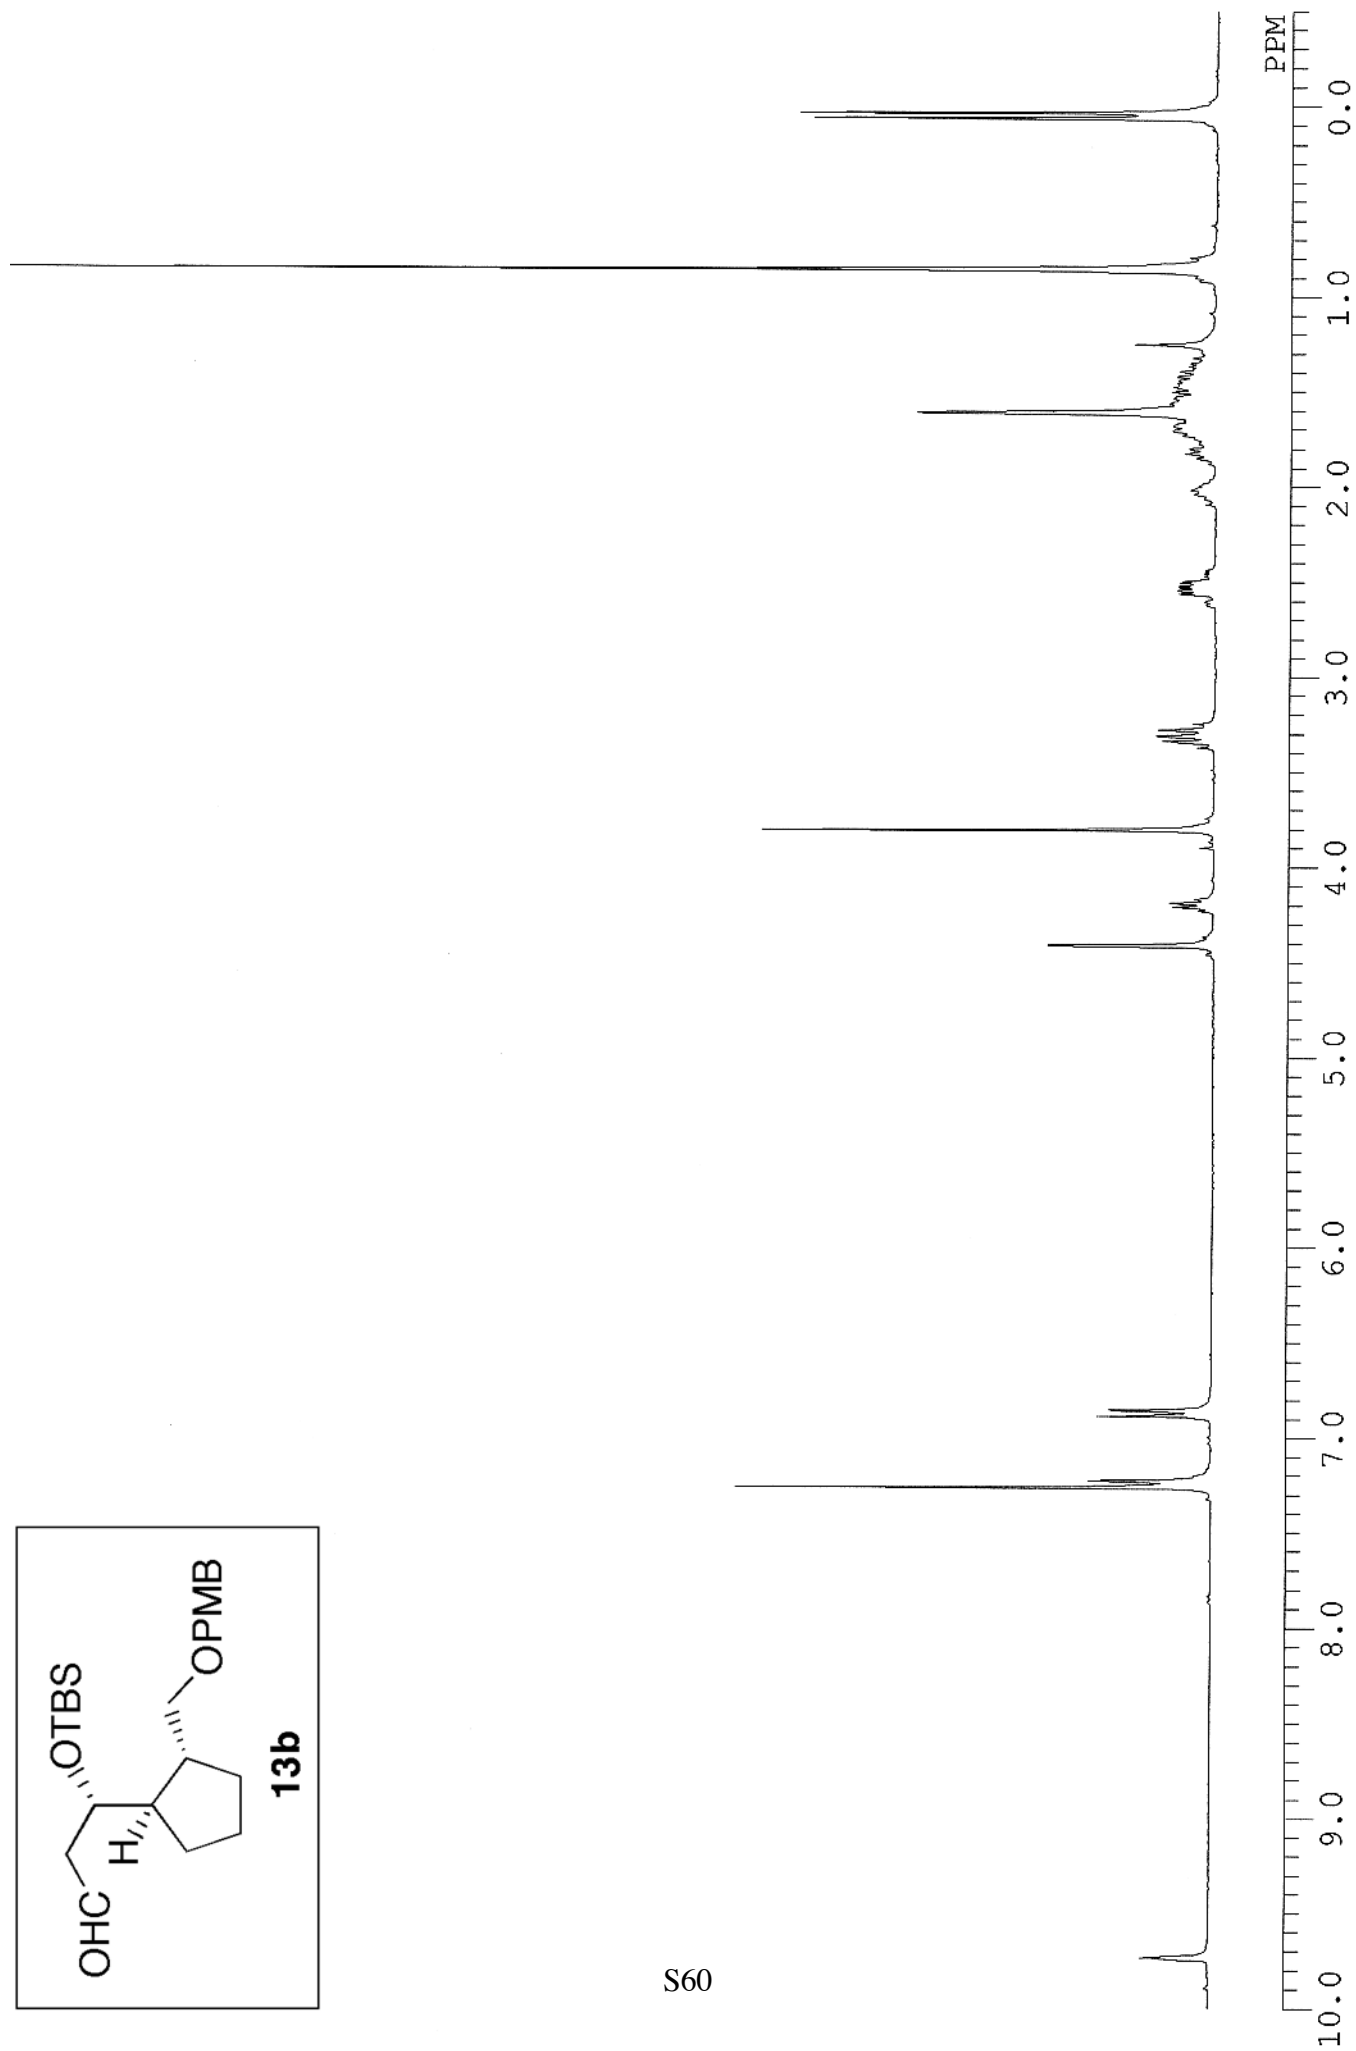

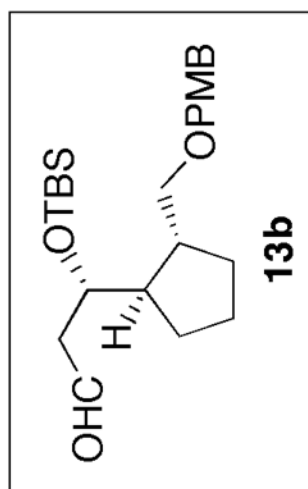

S61

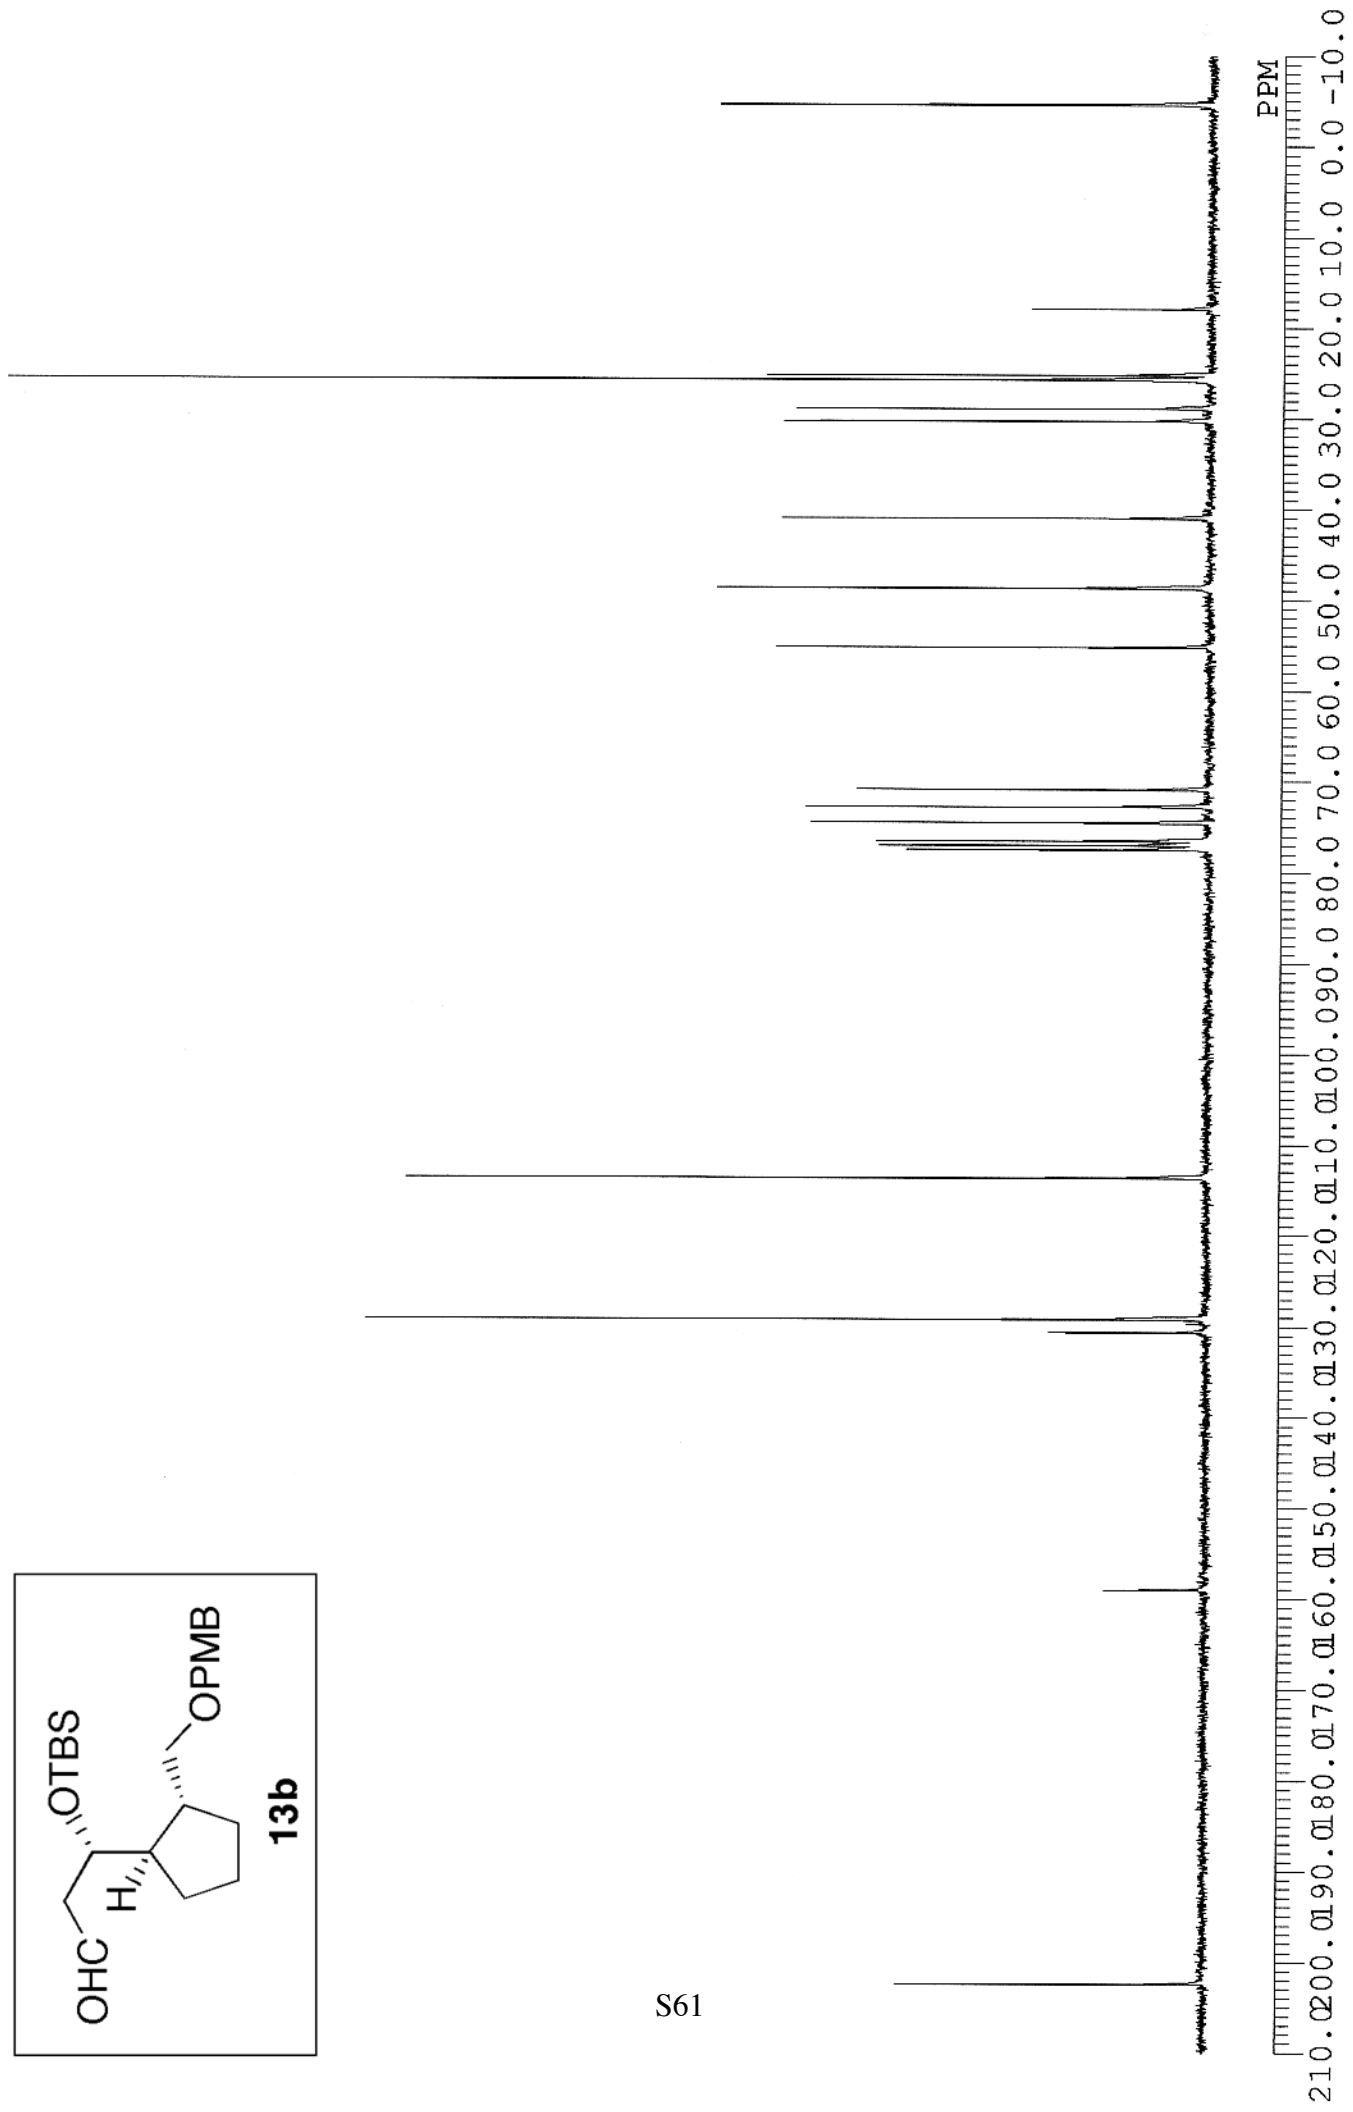

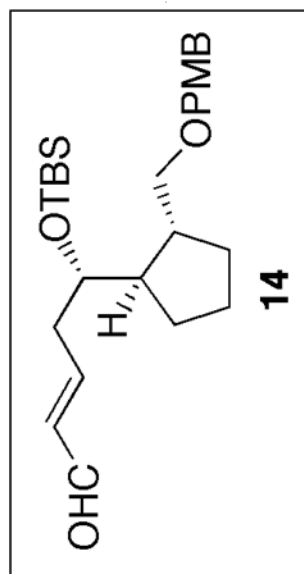

S62

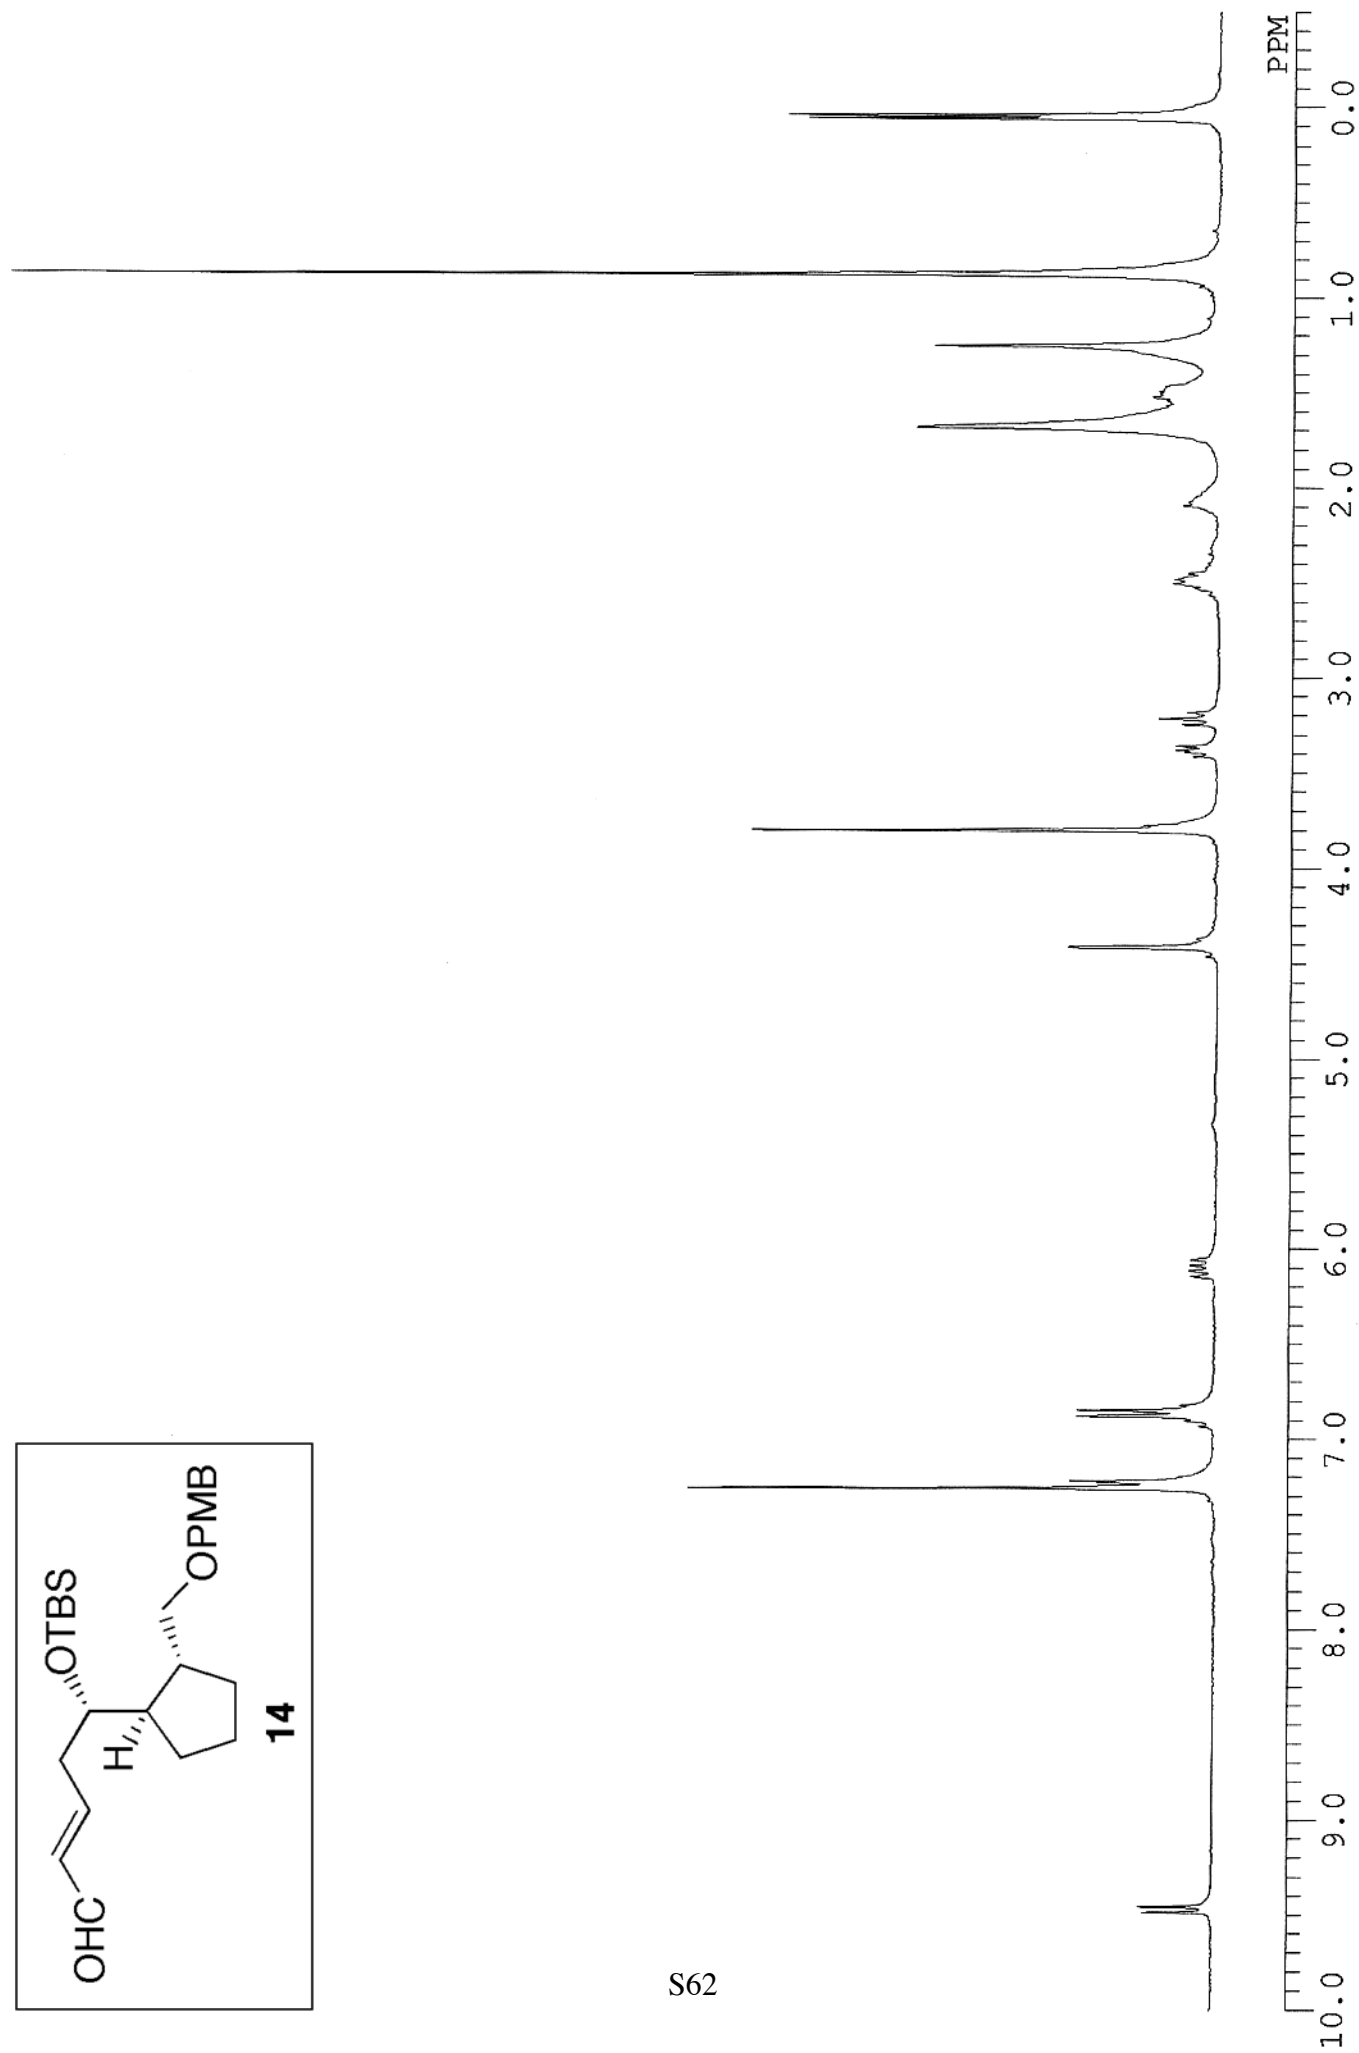

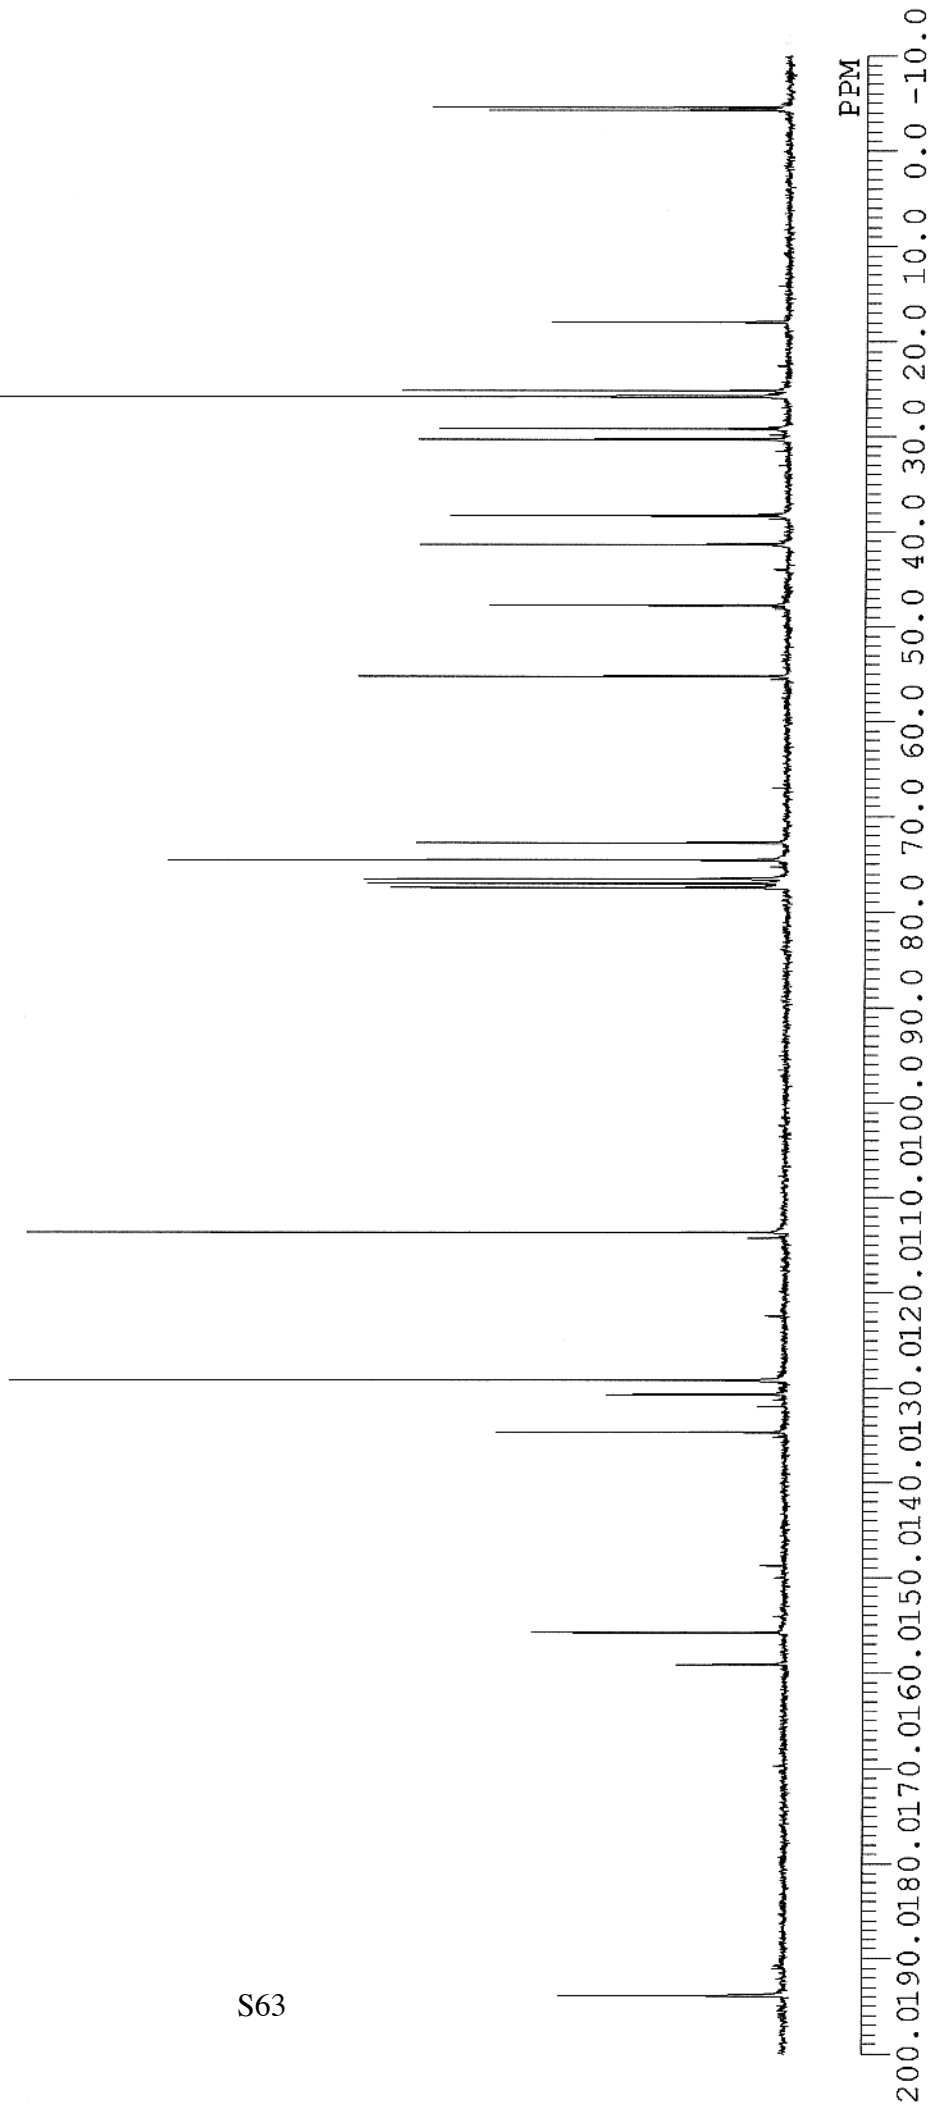

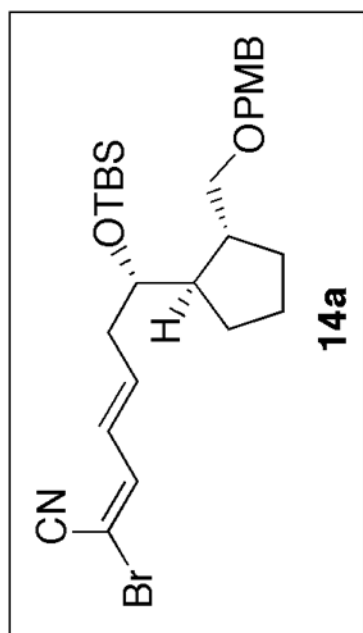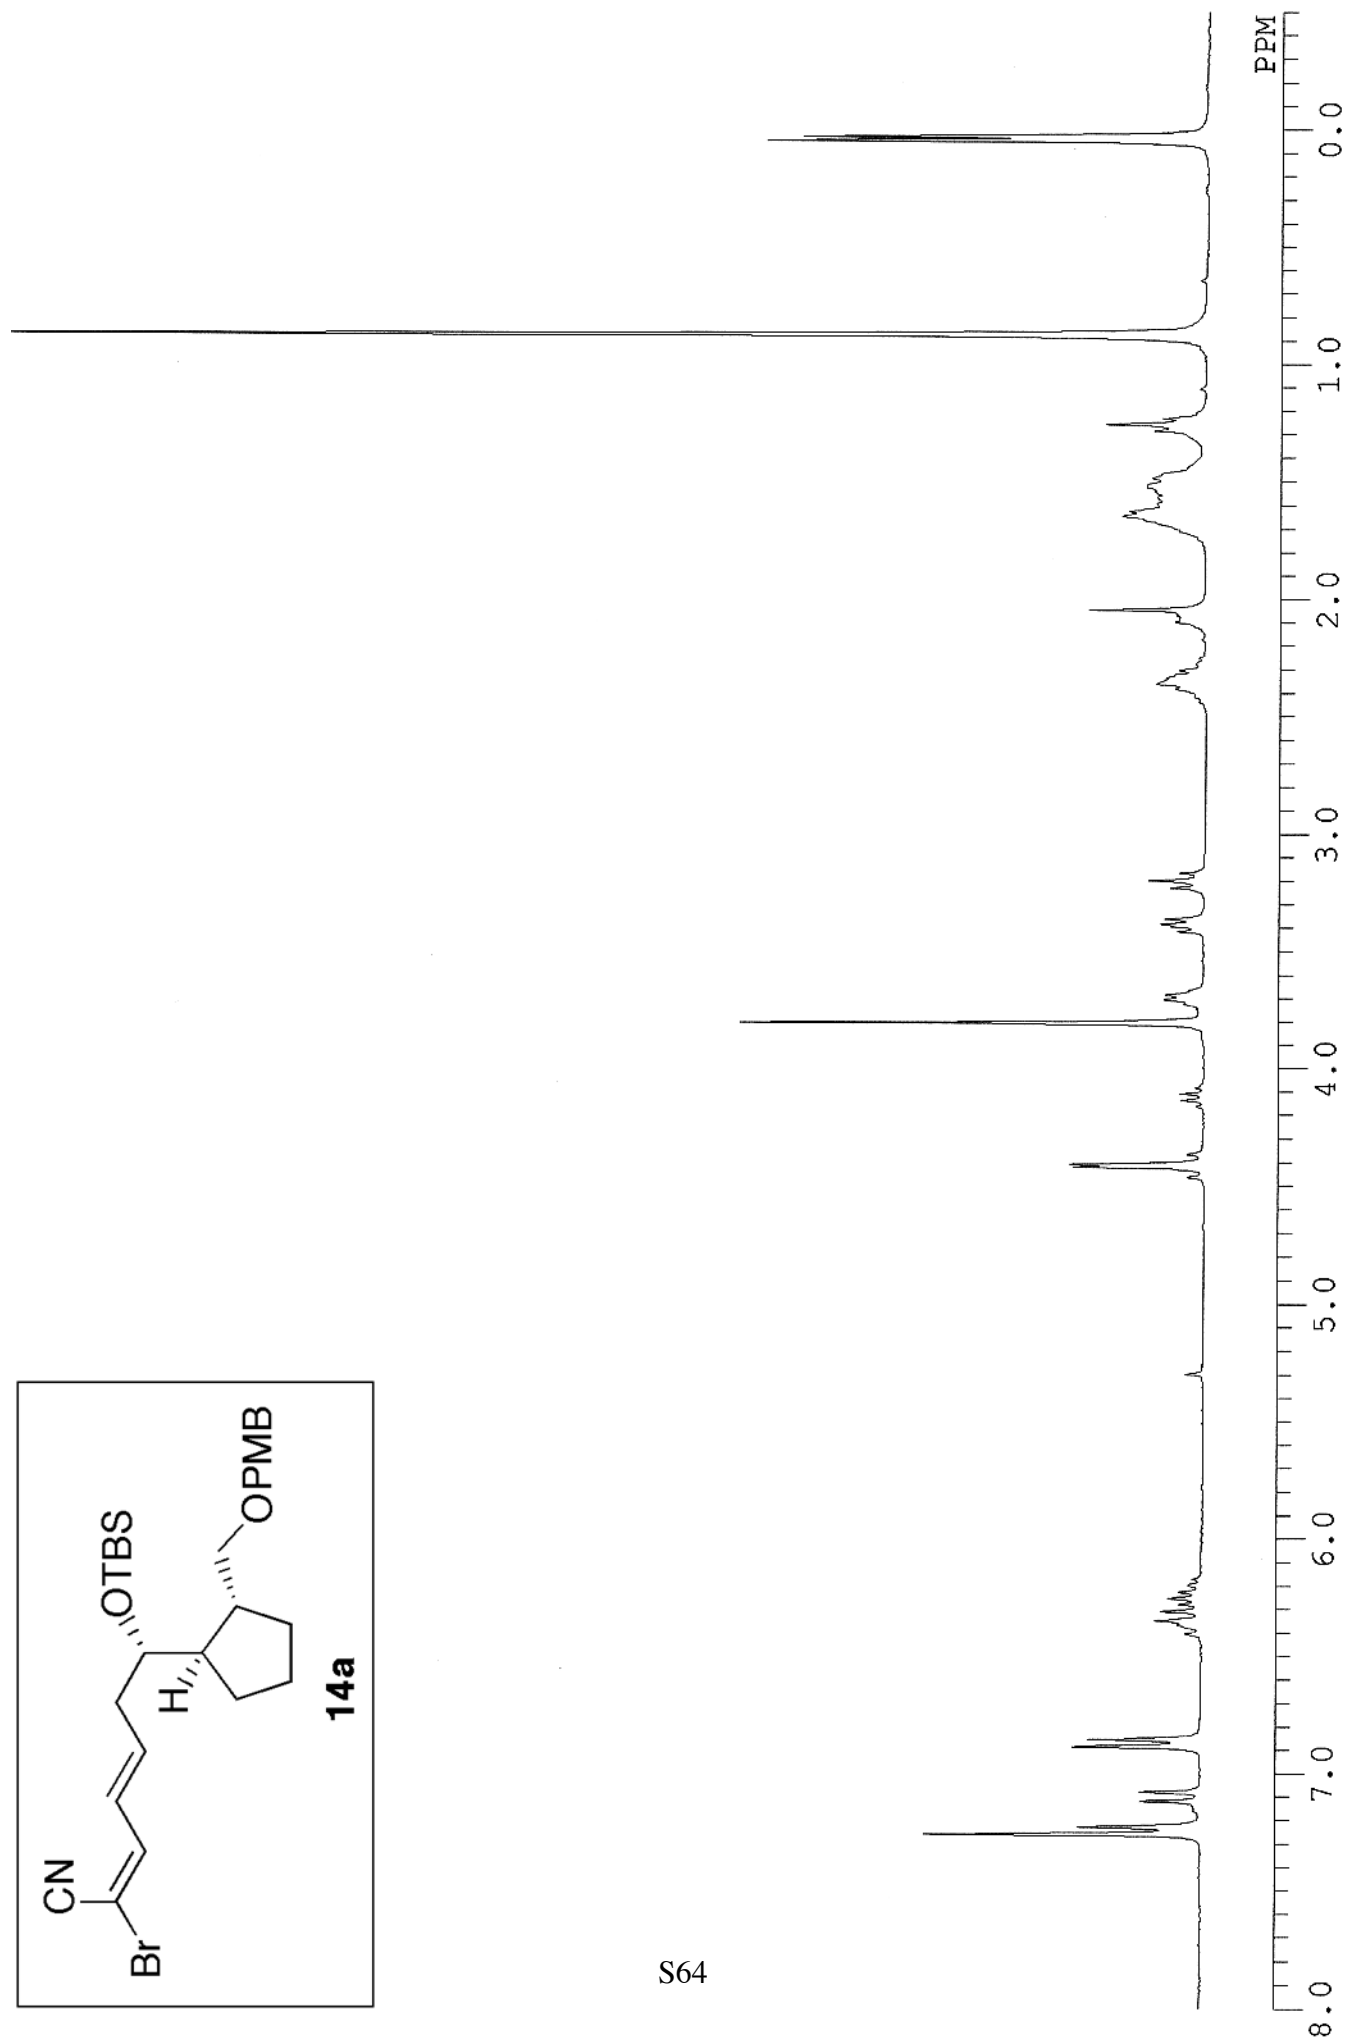



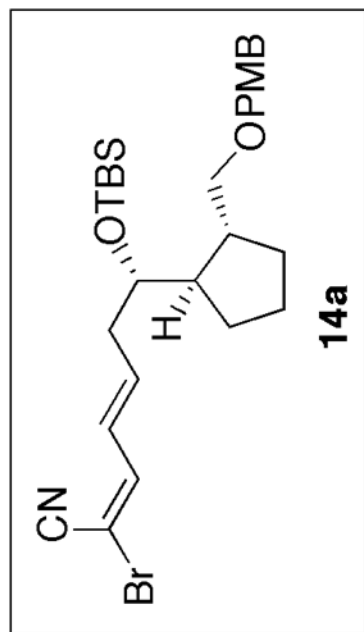

S65

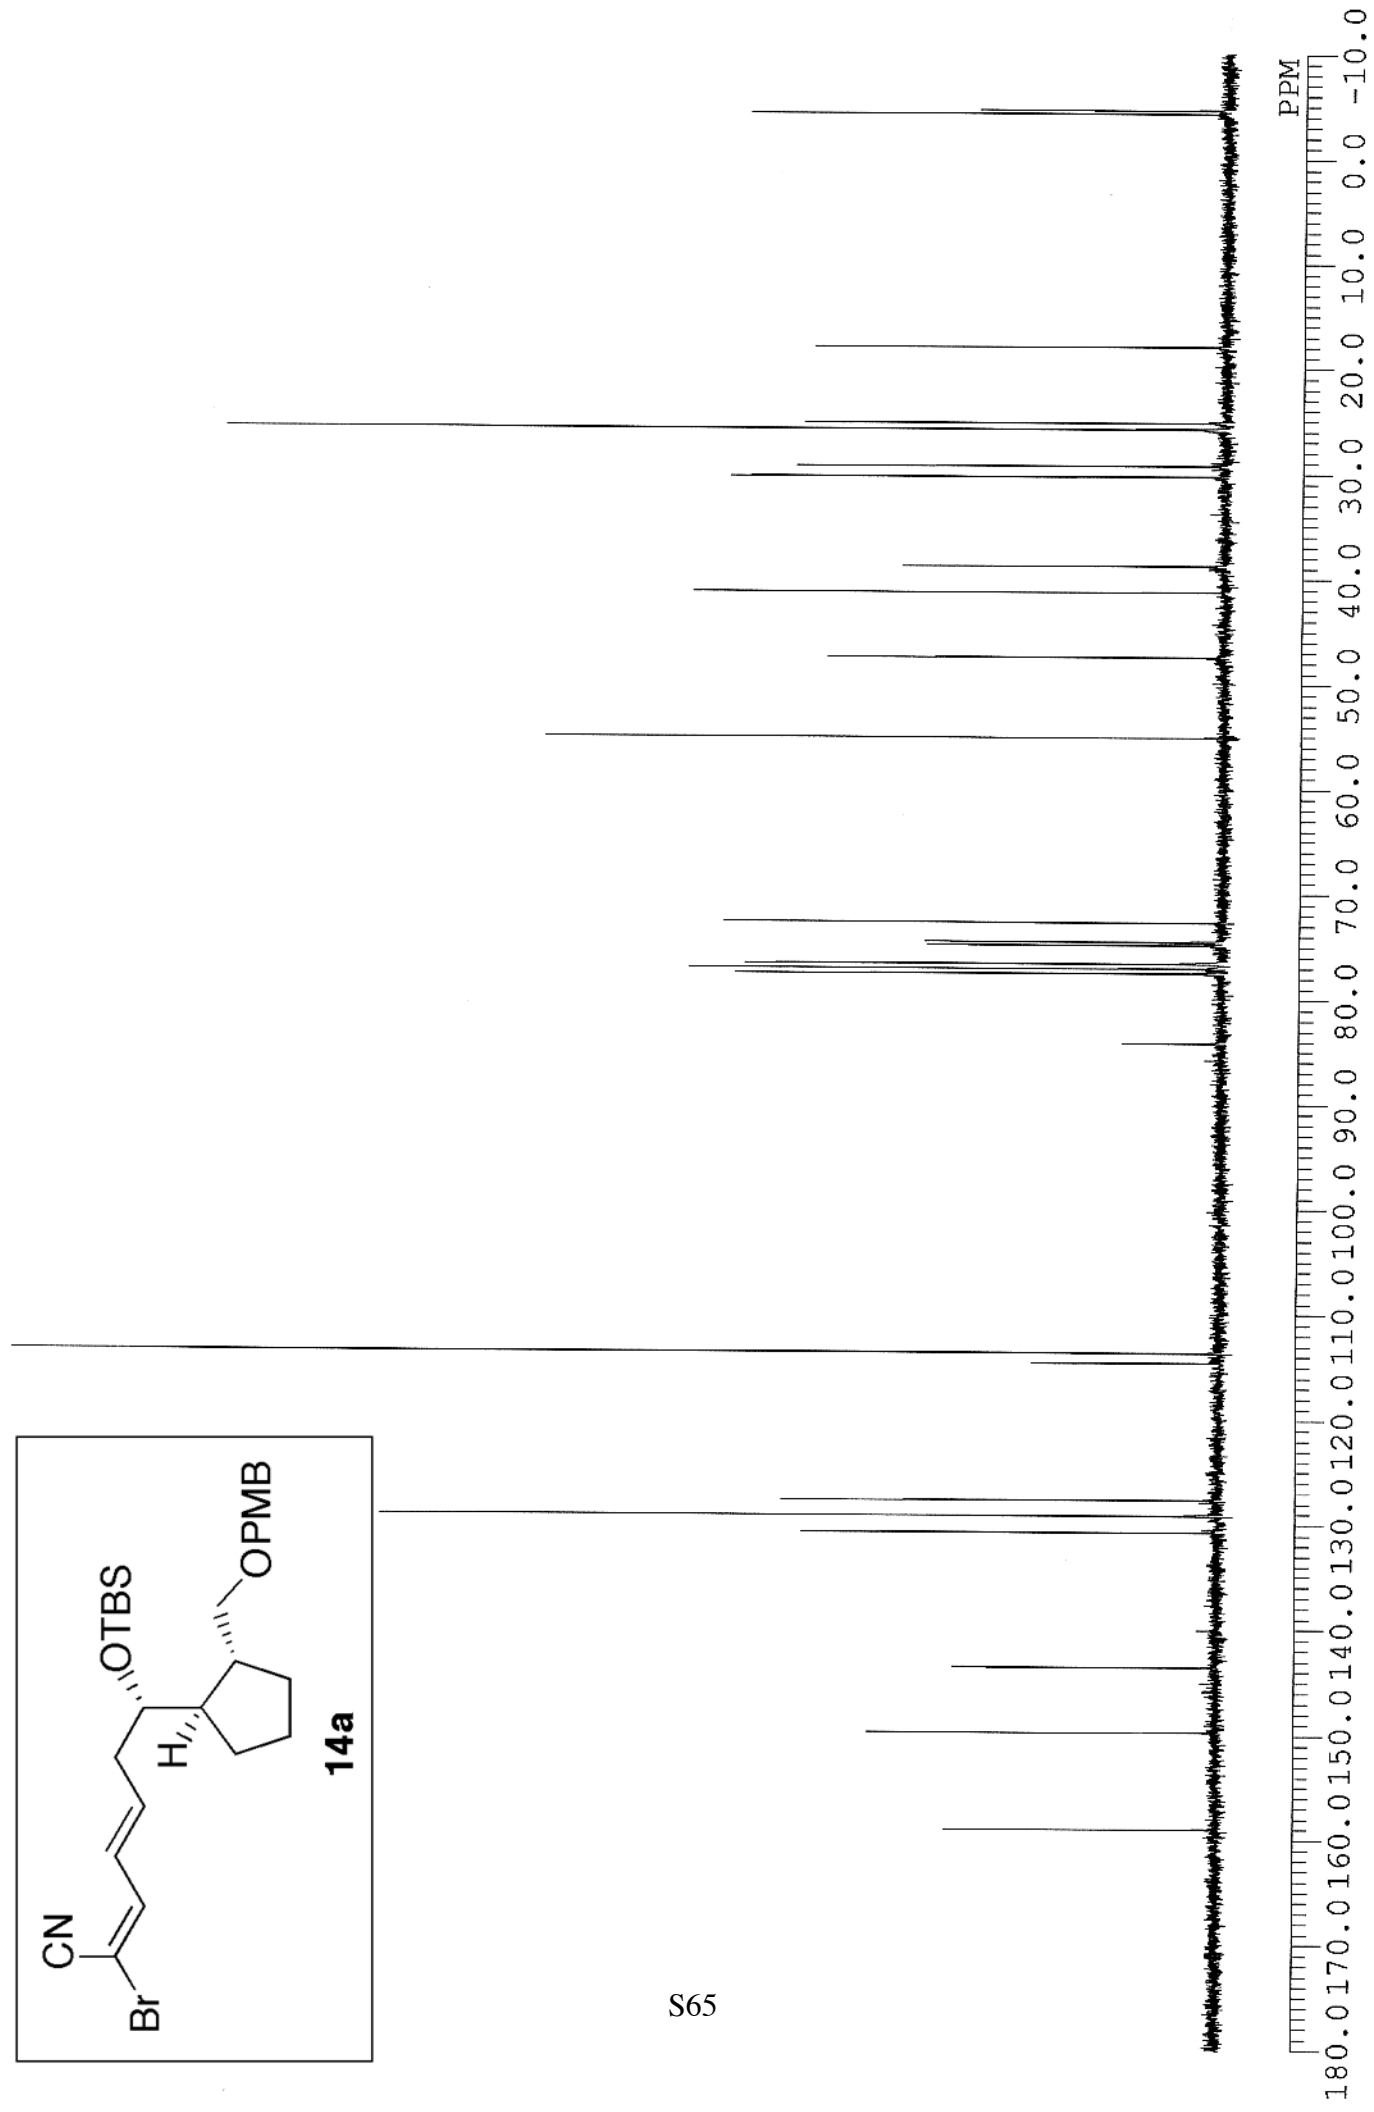

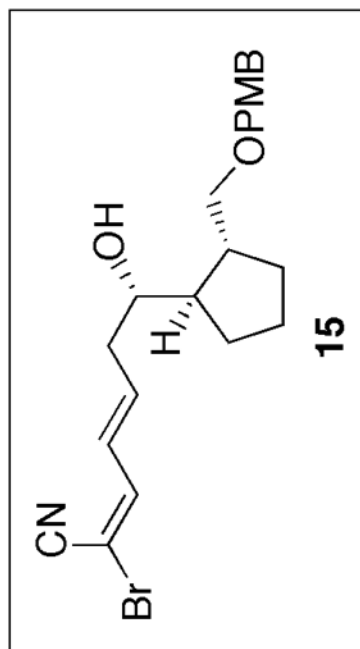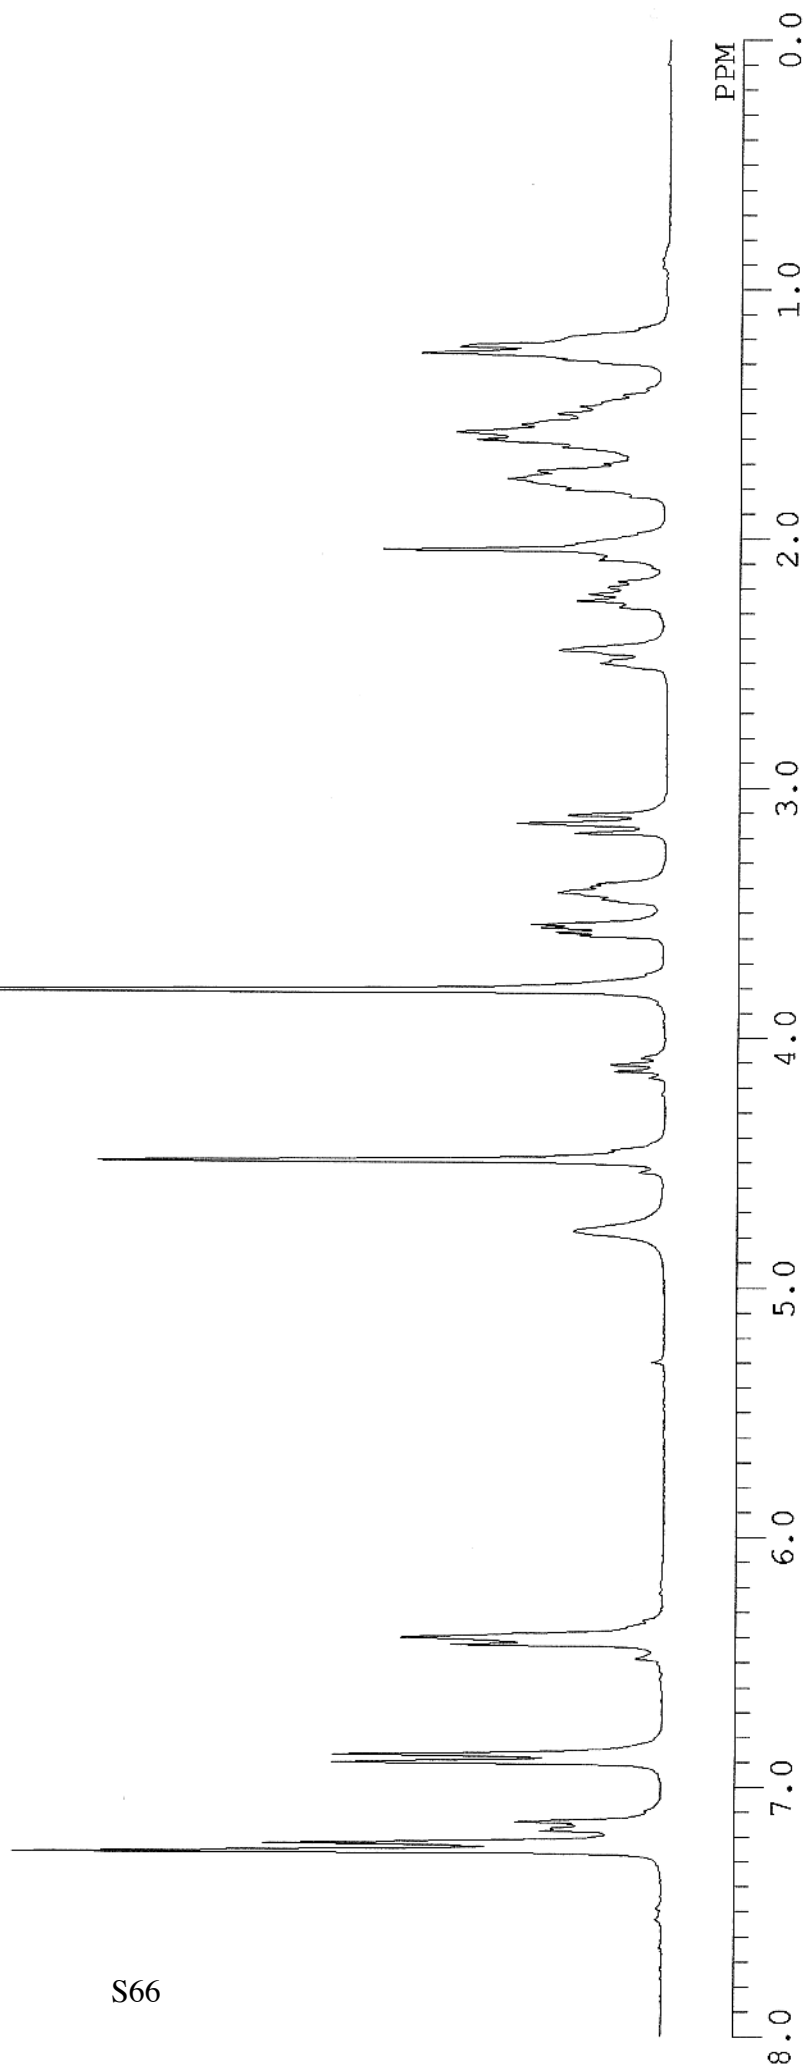

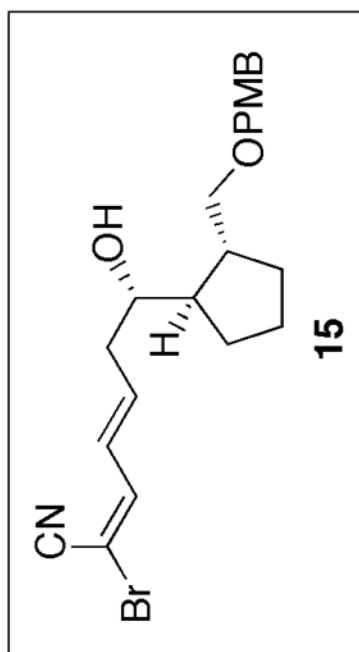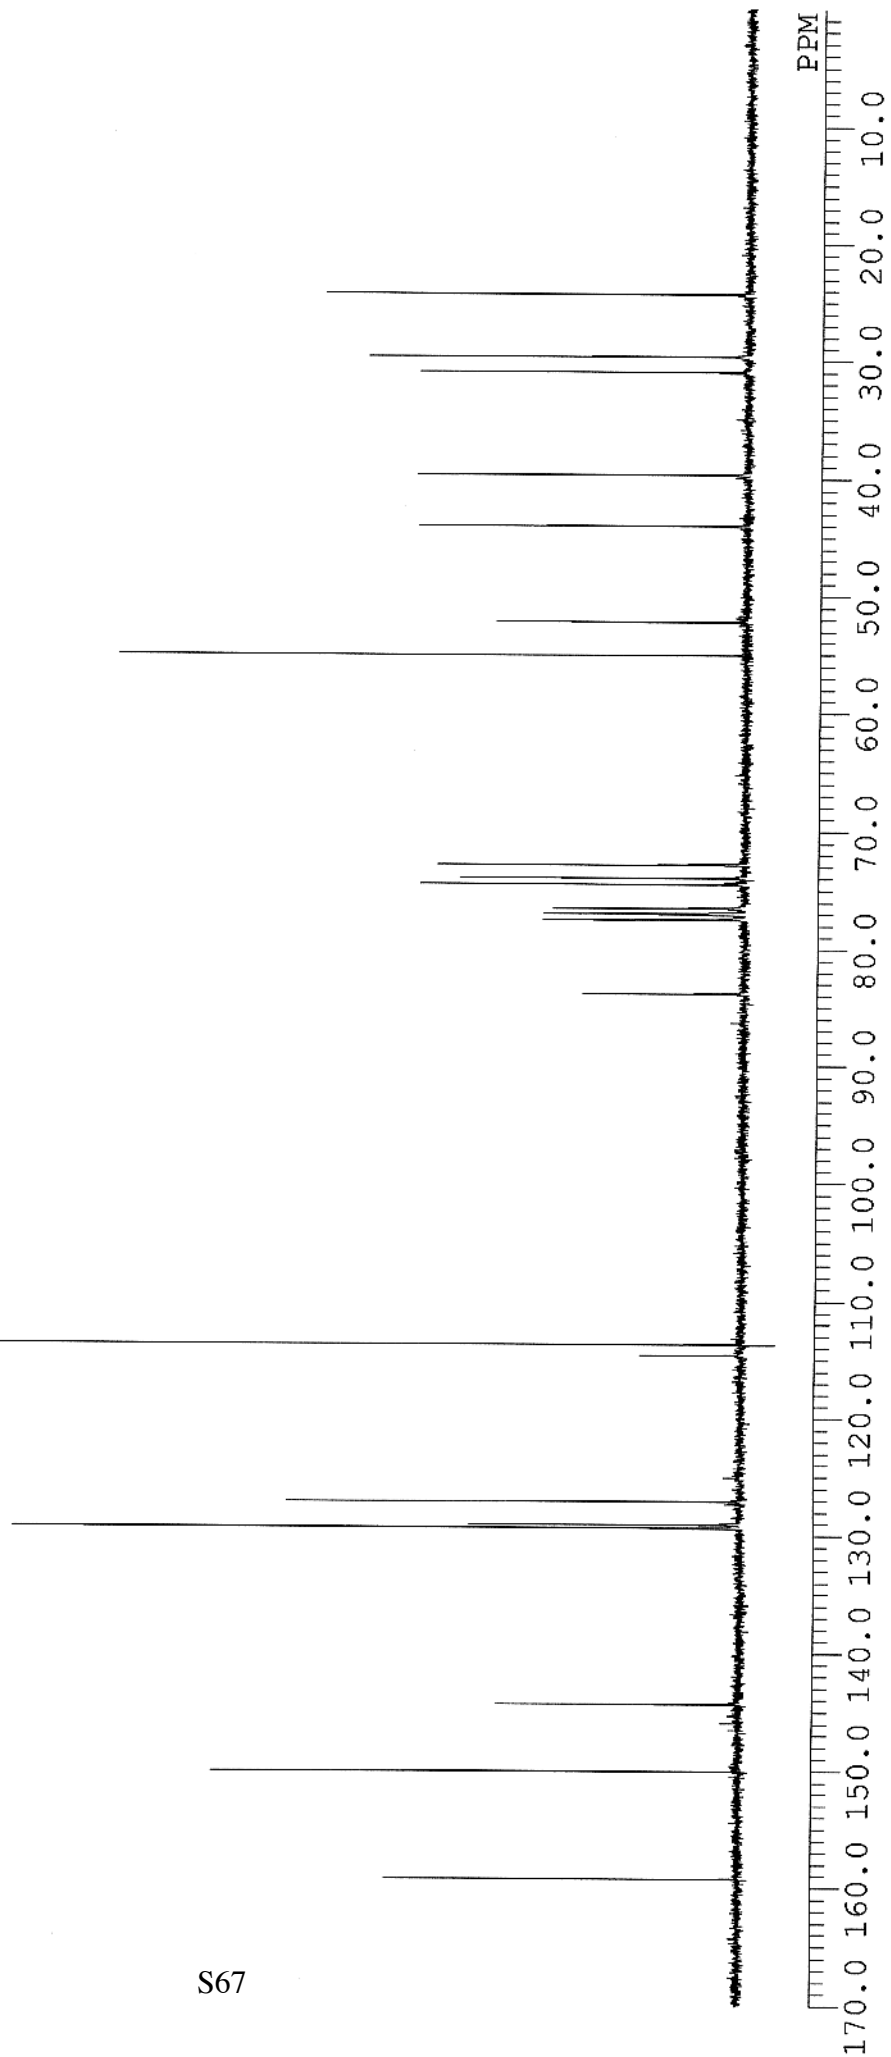

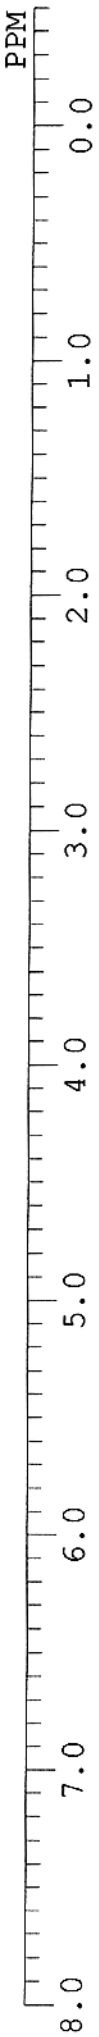

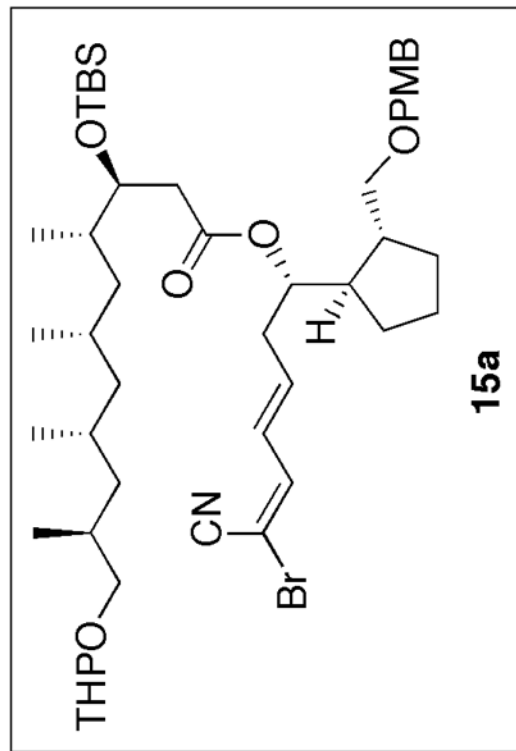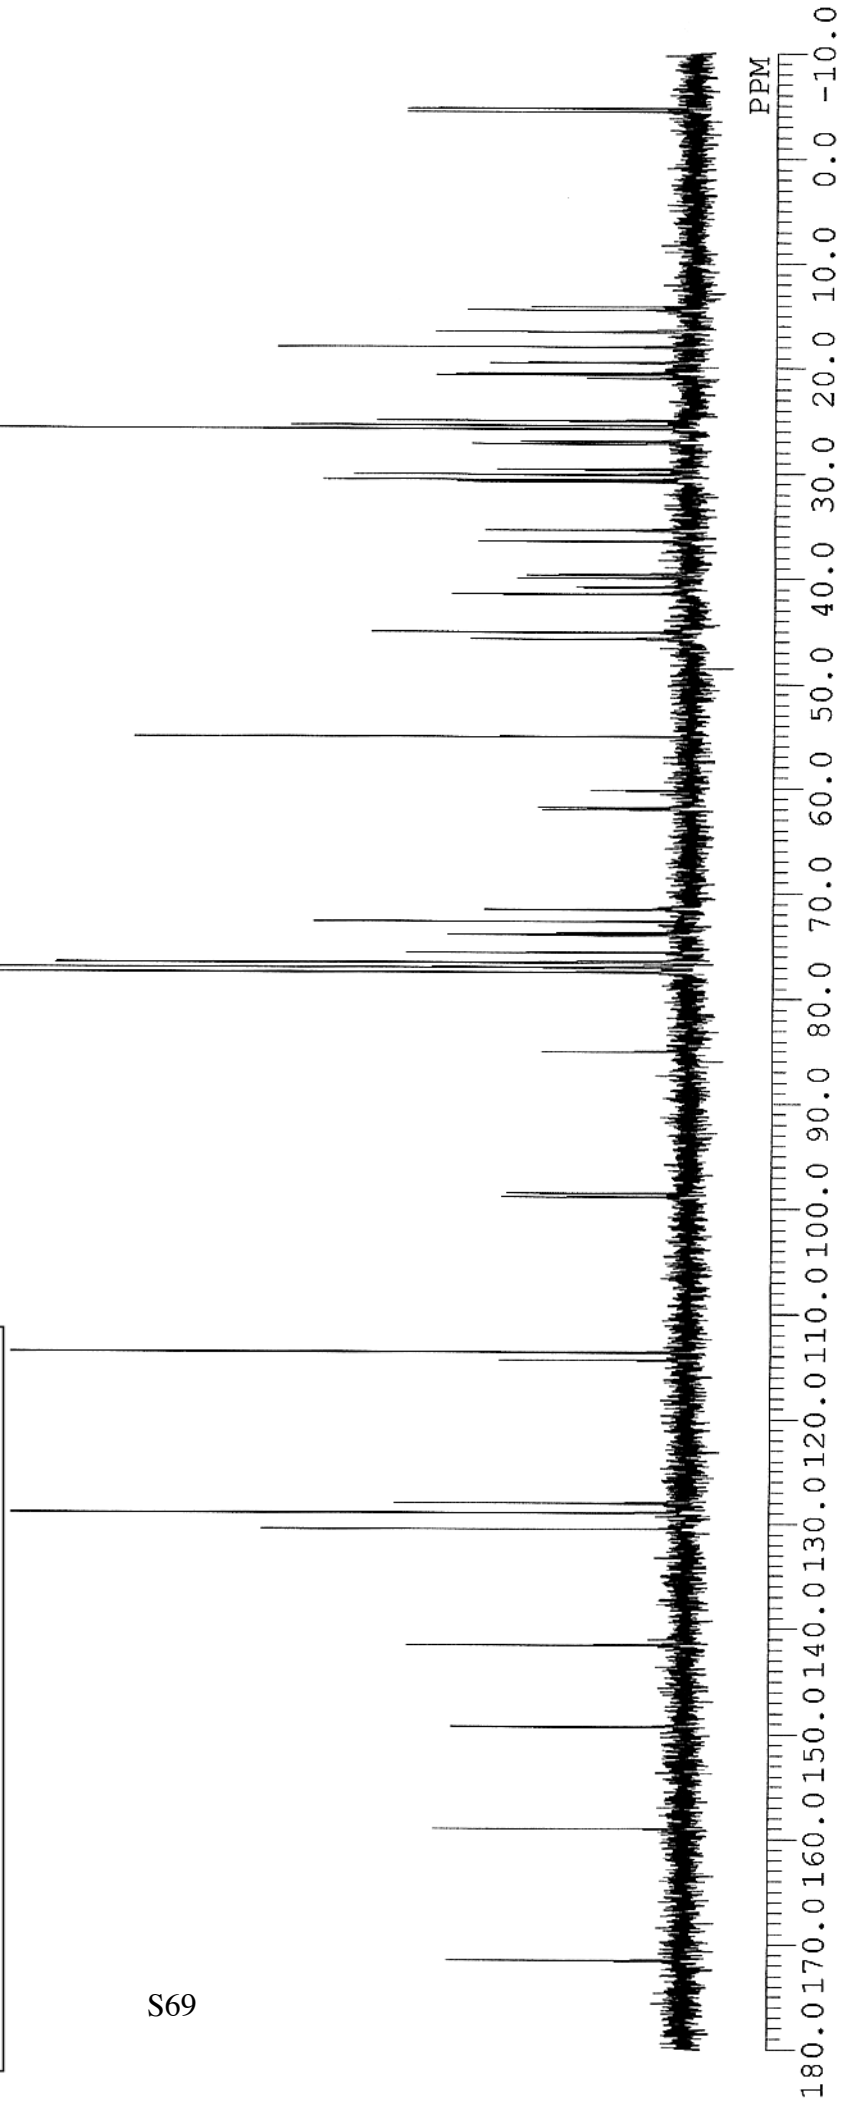

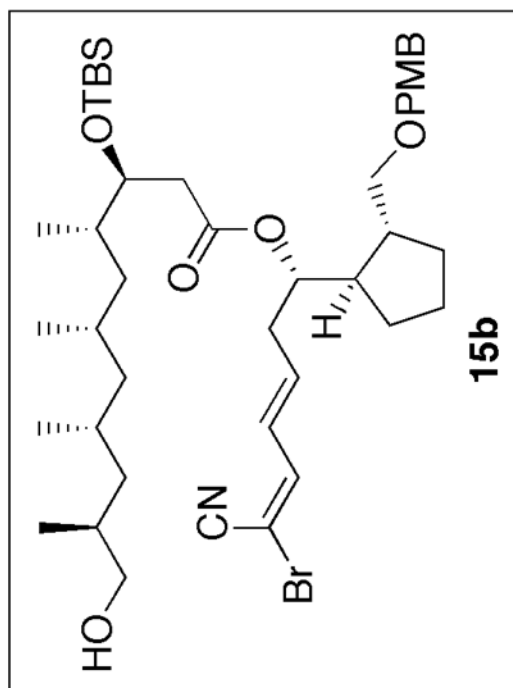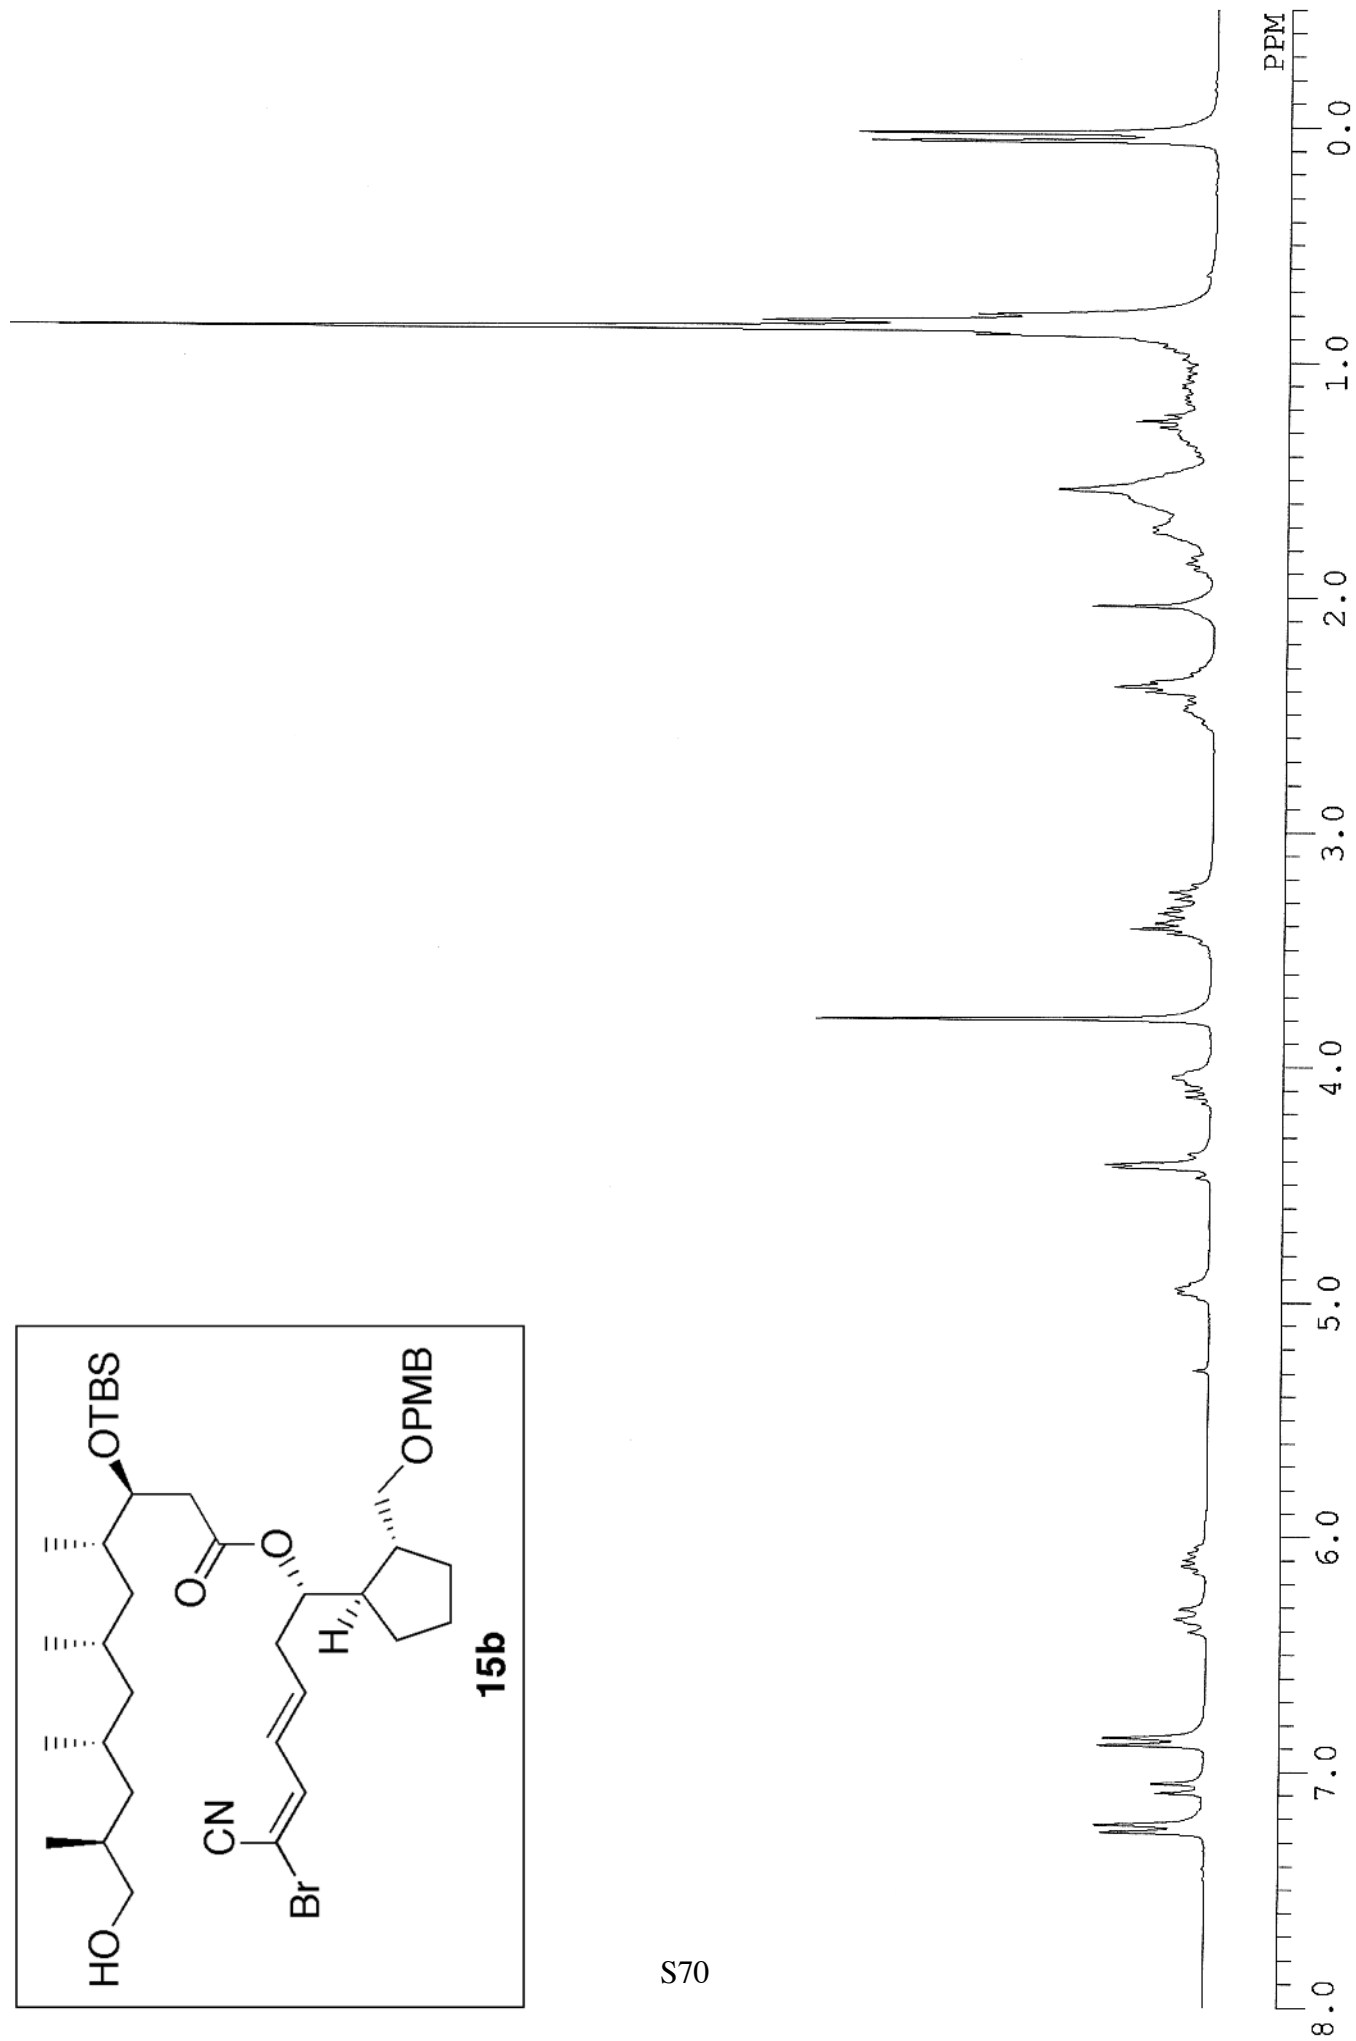

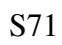

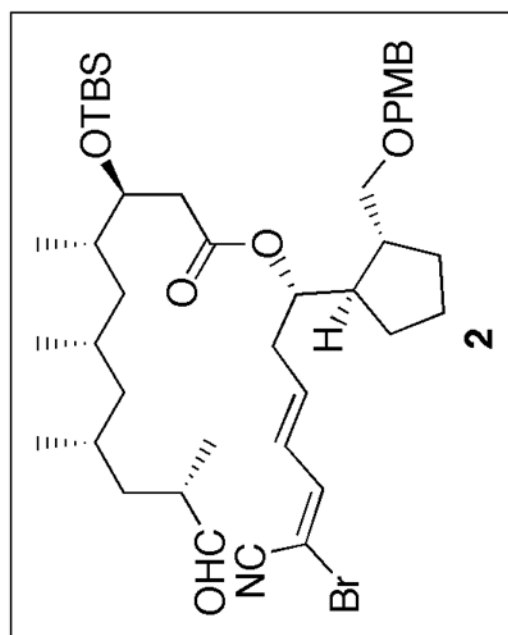

S72

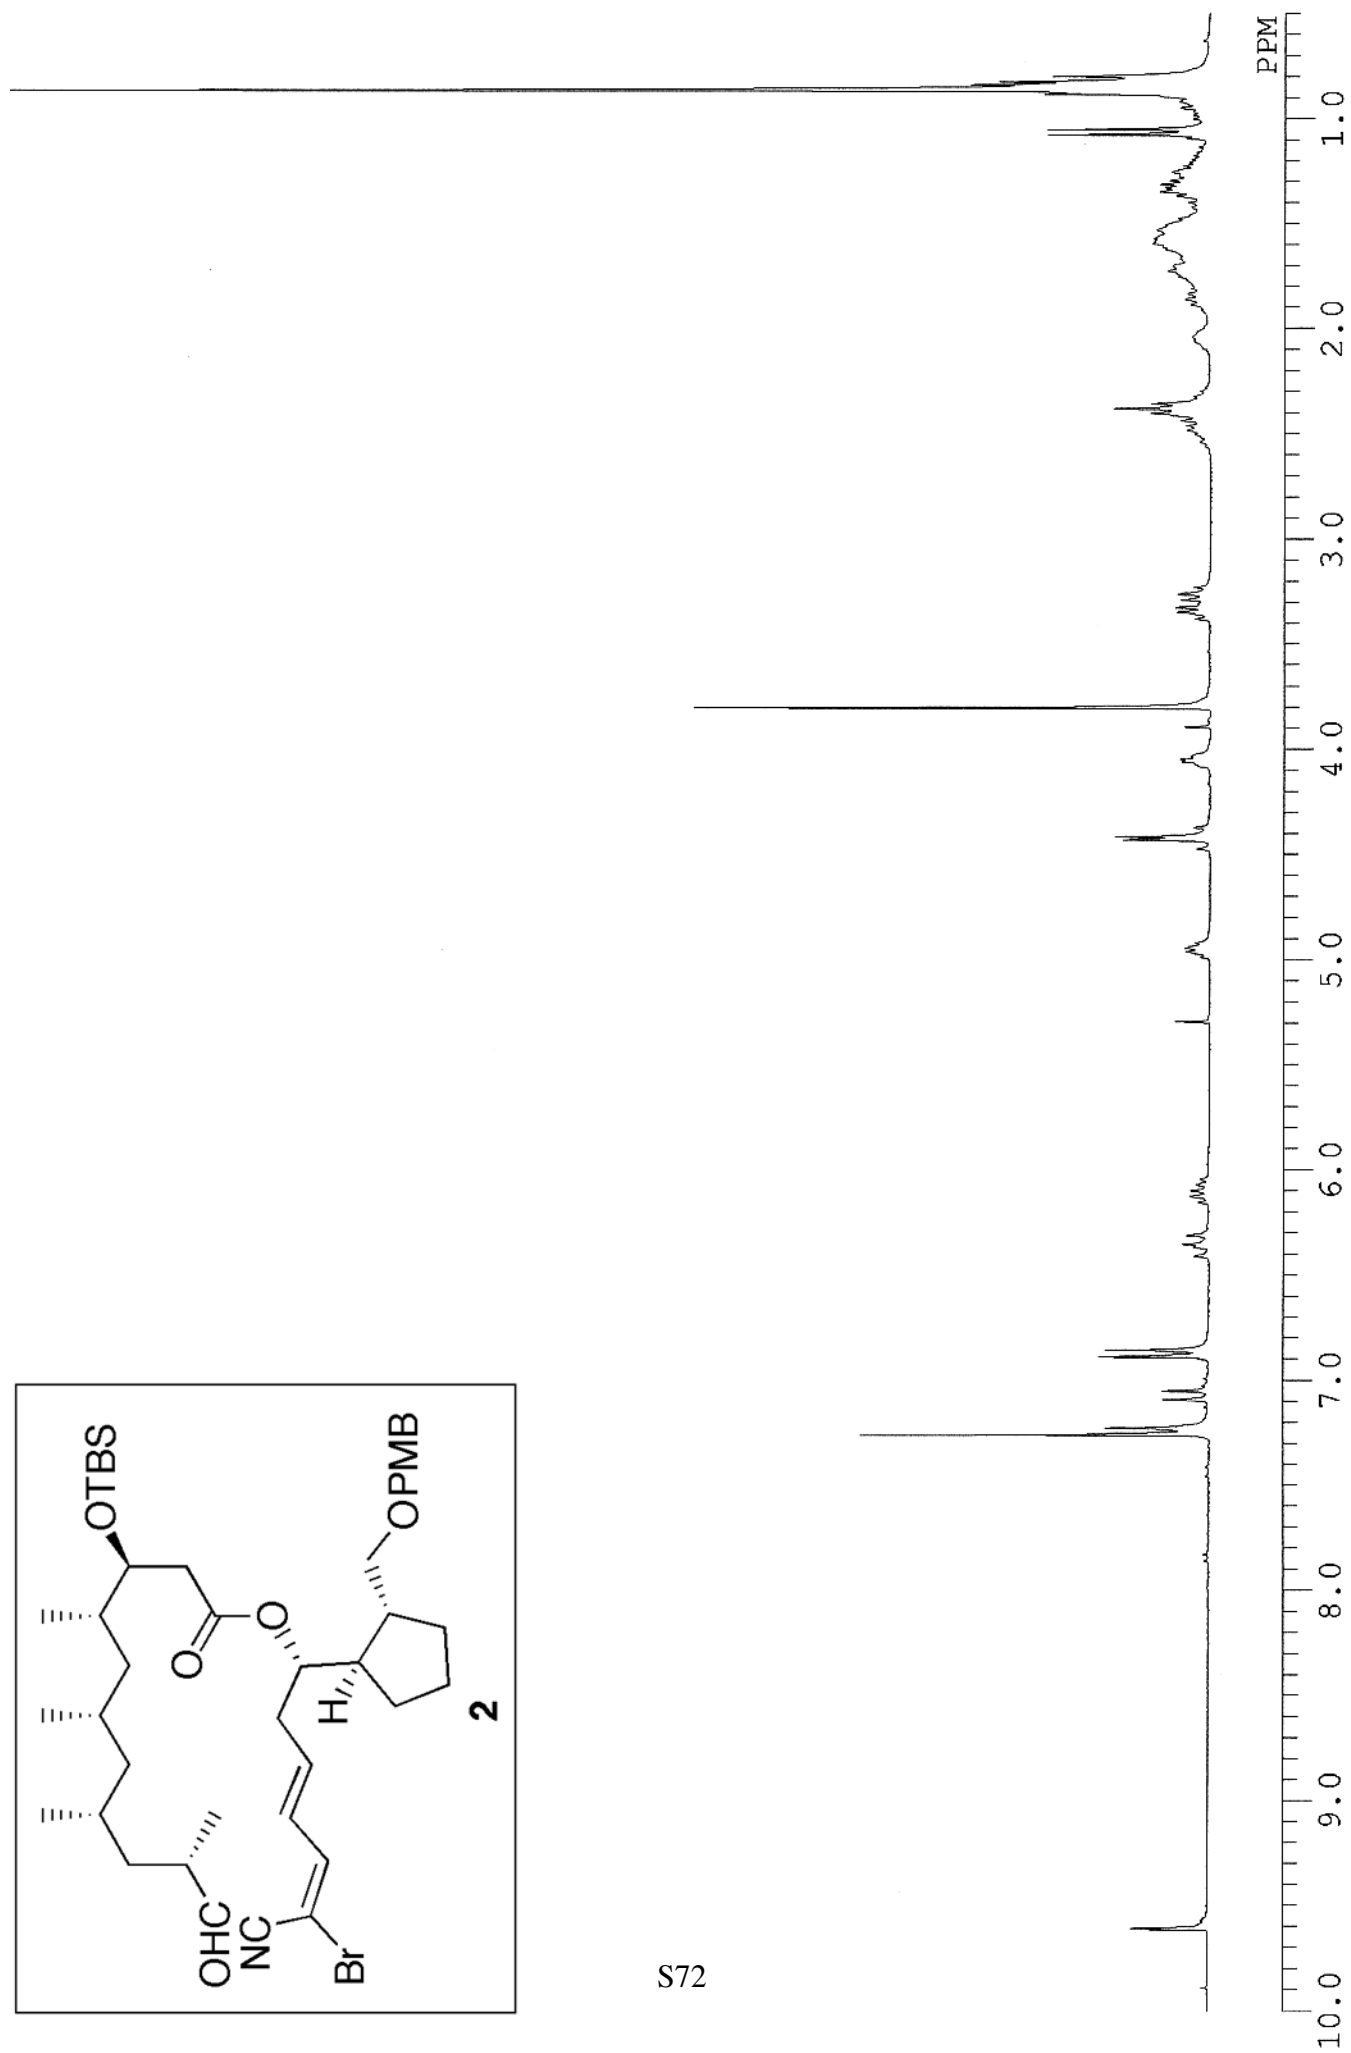



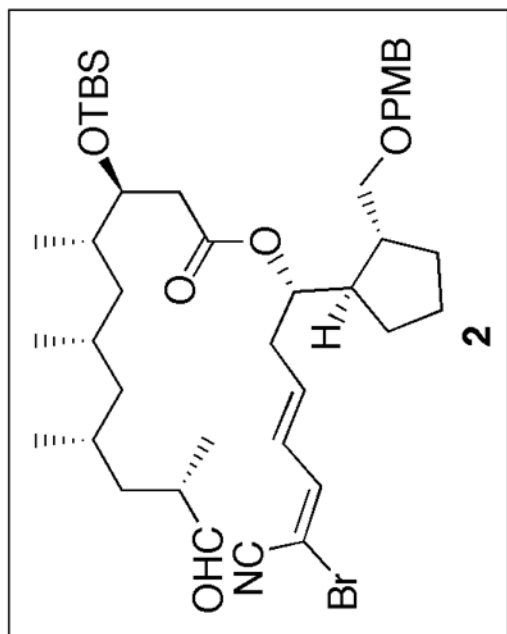

S73

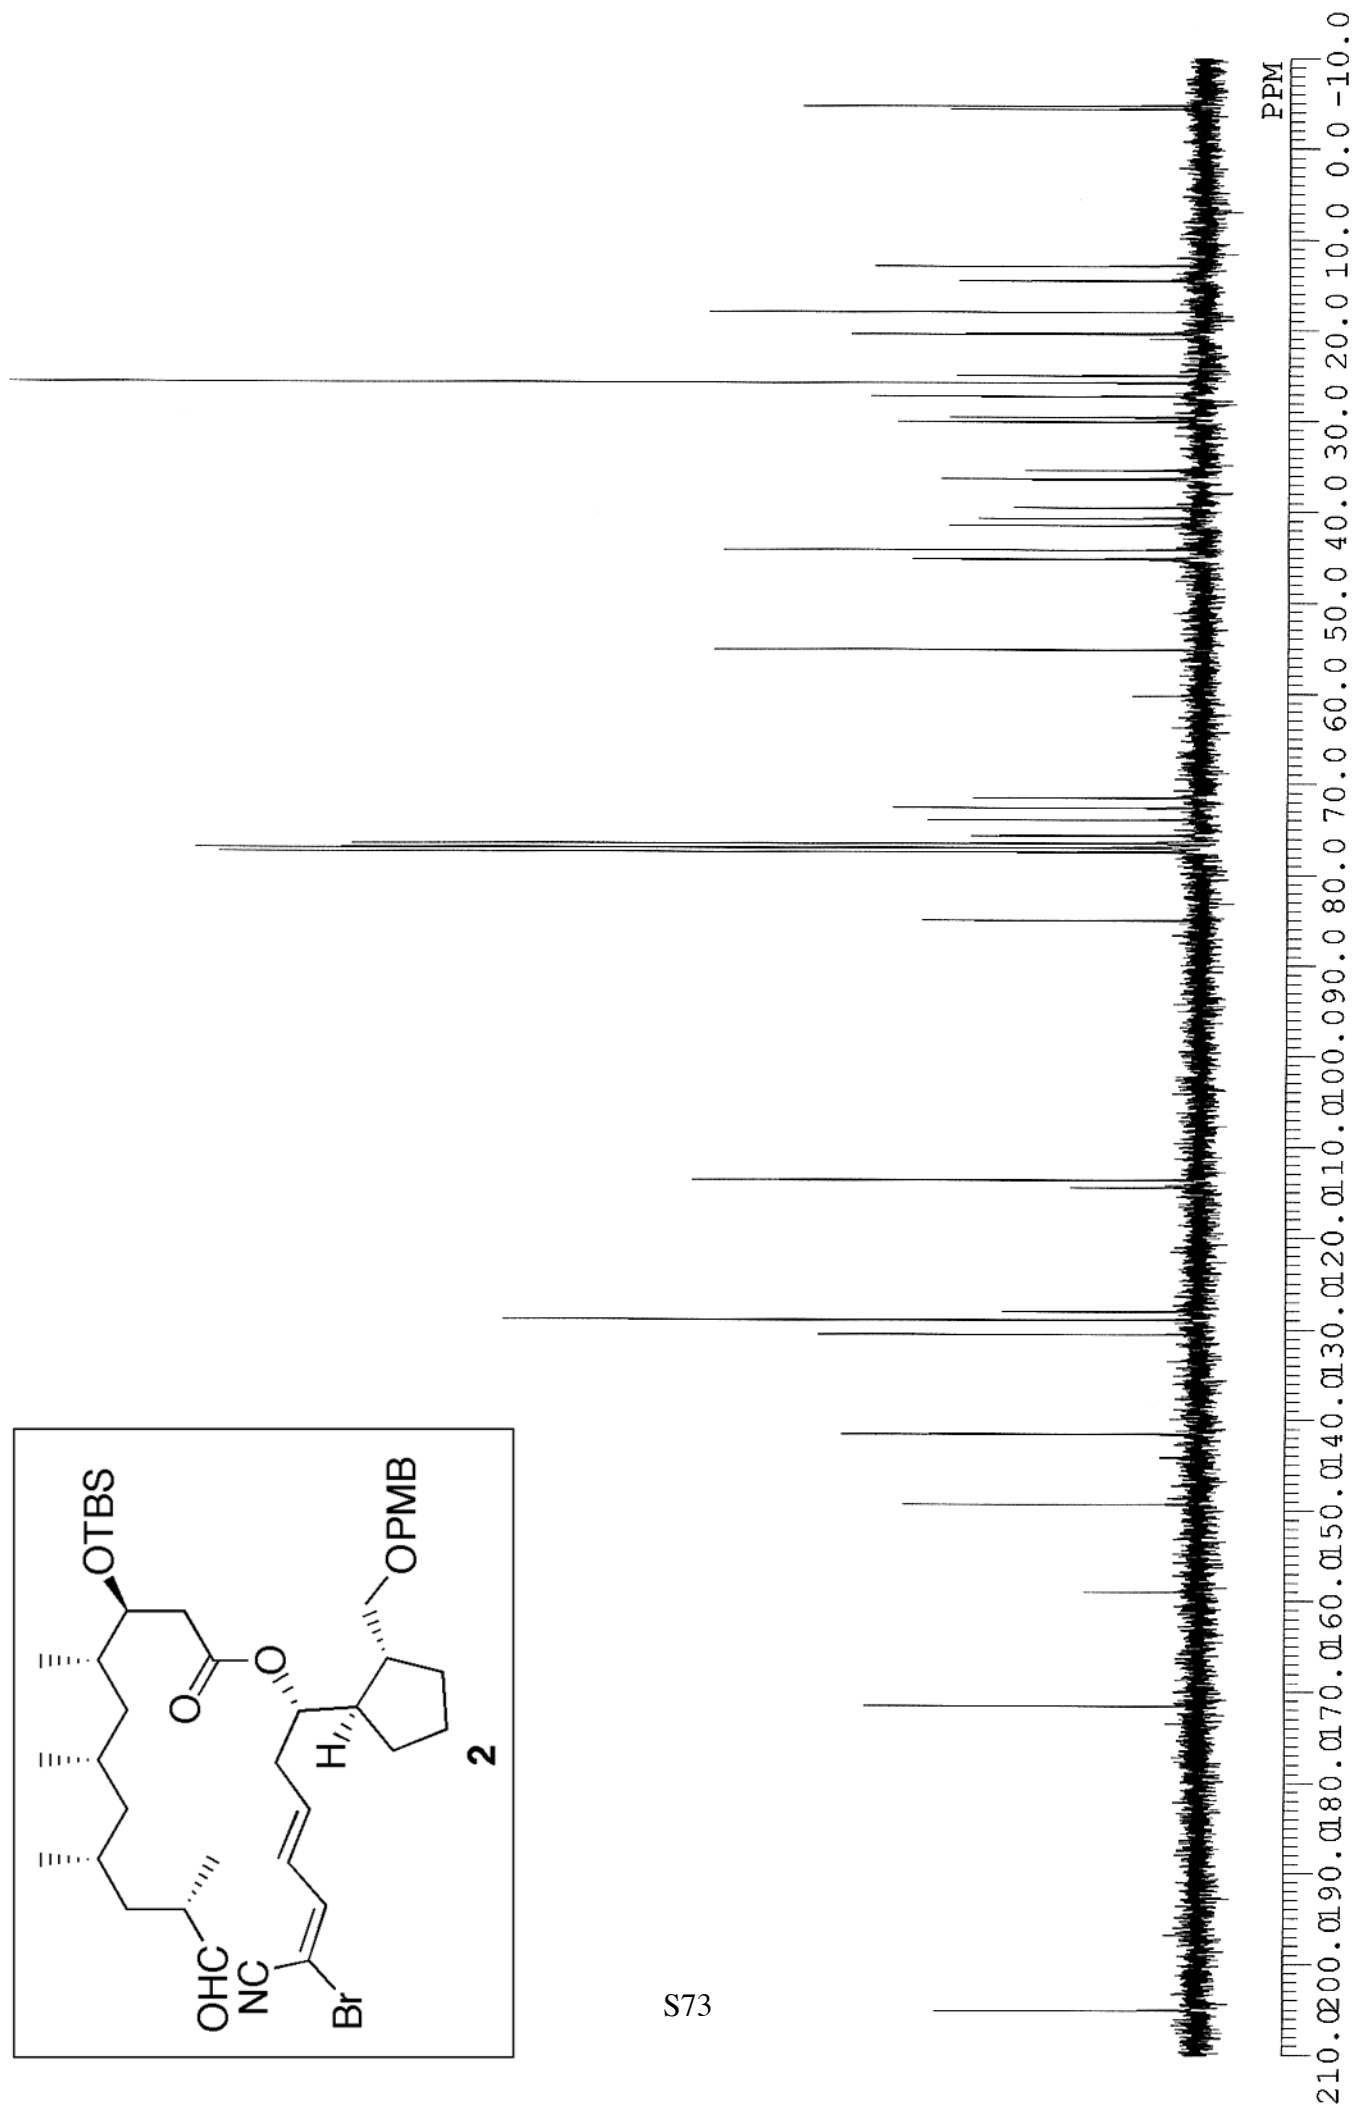

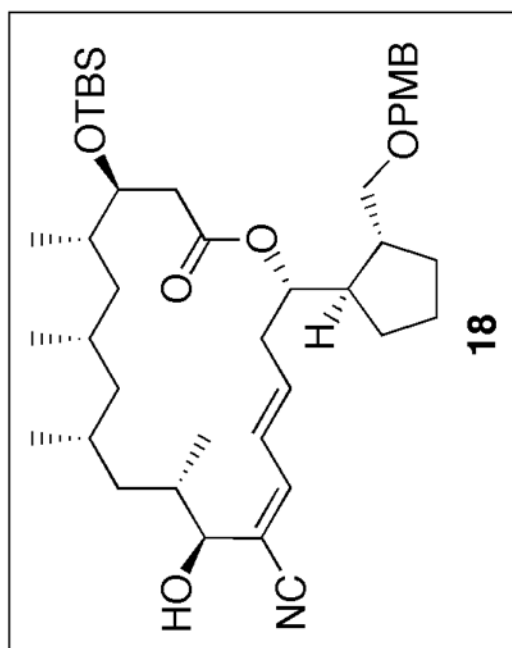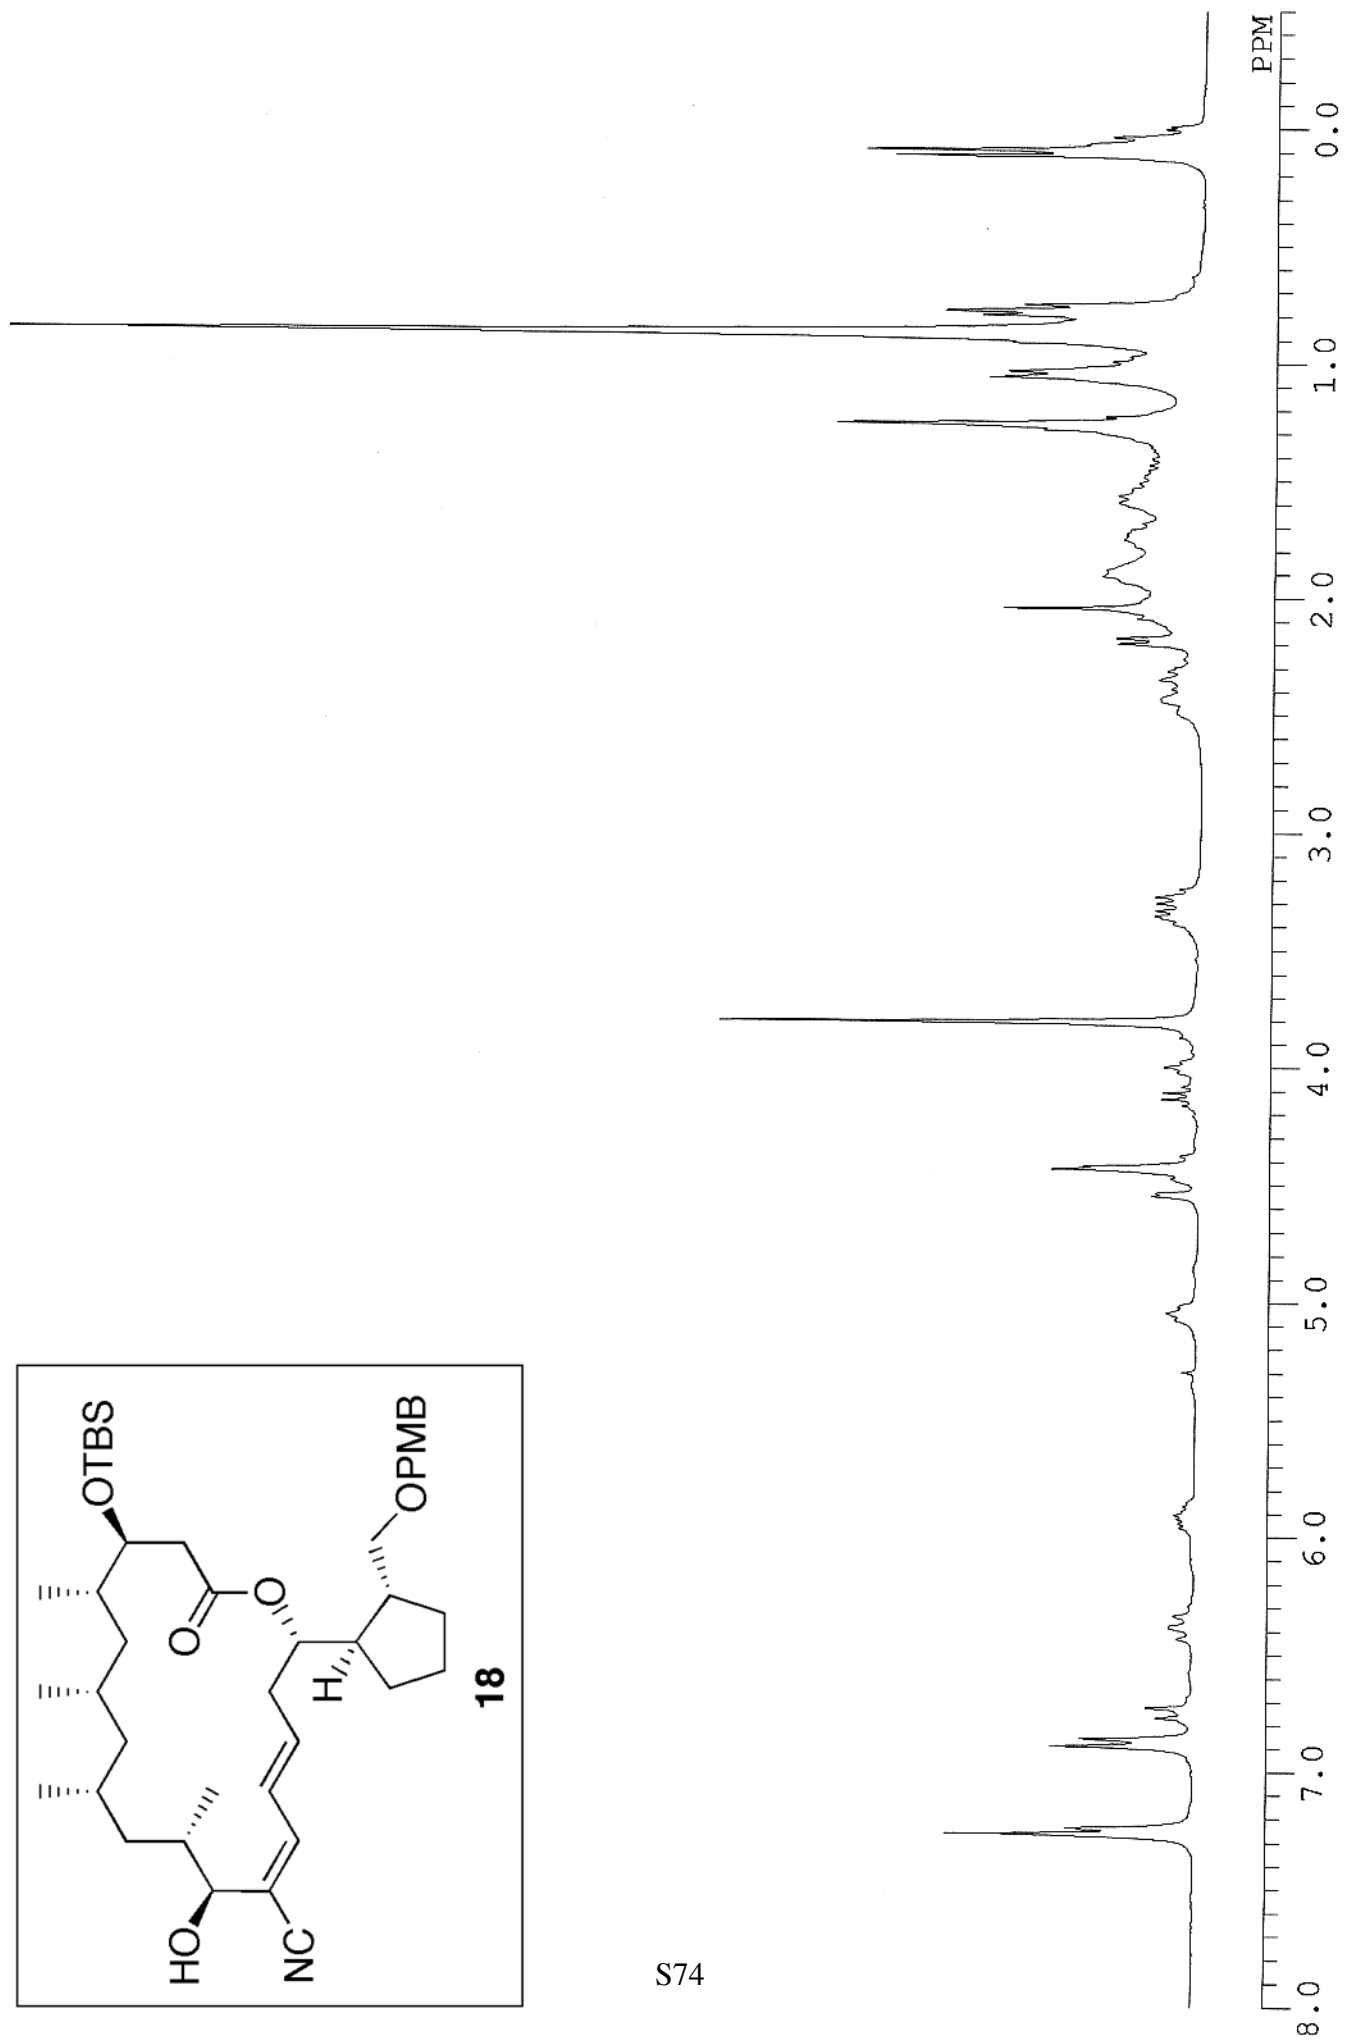

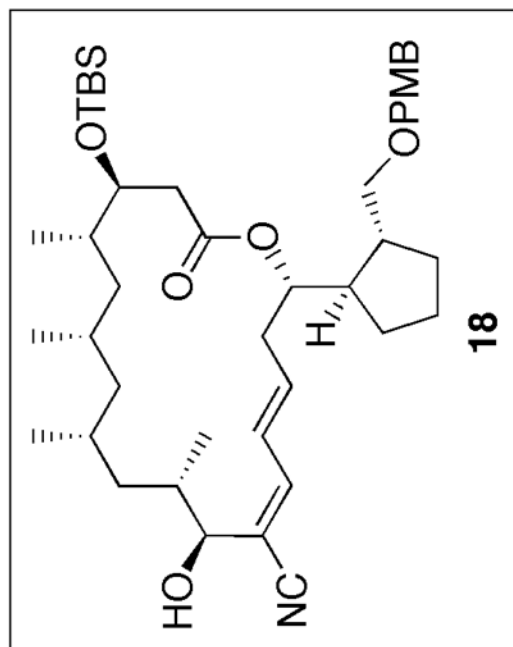

S75

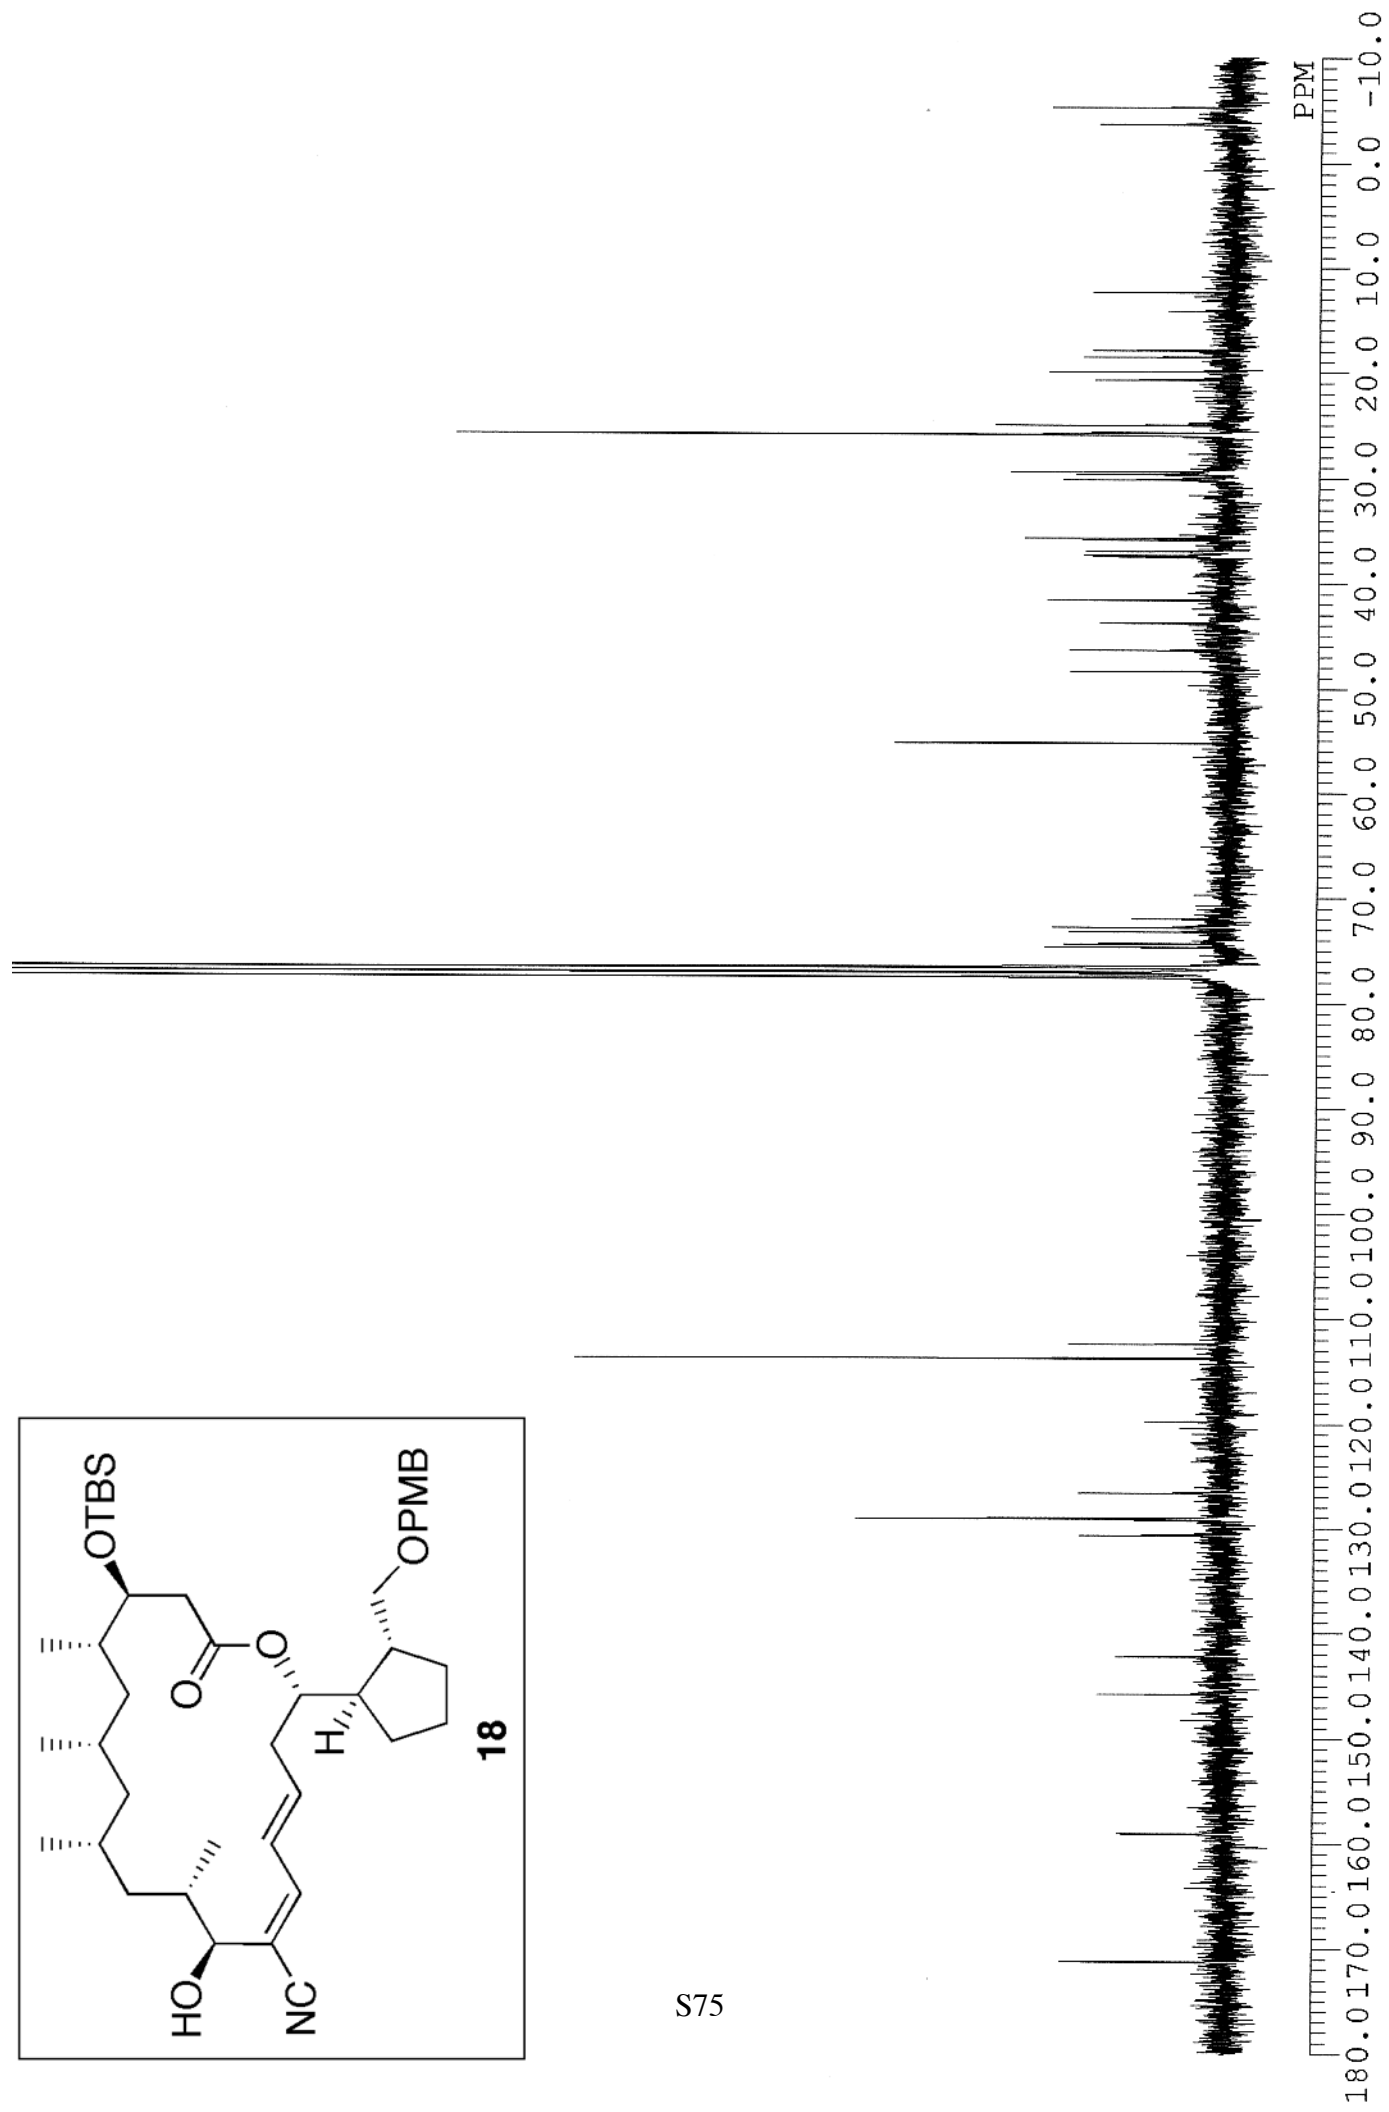

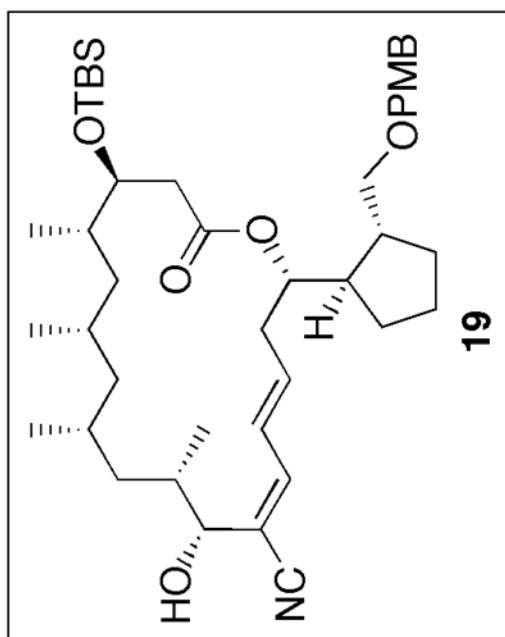

S76

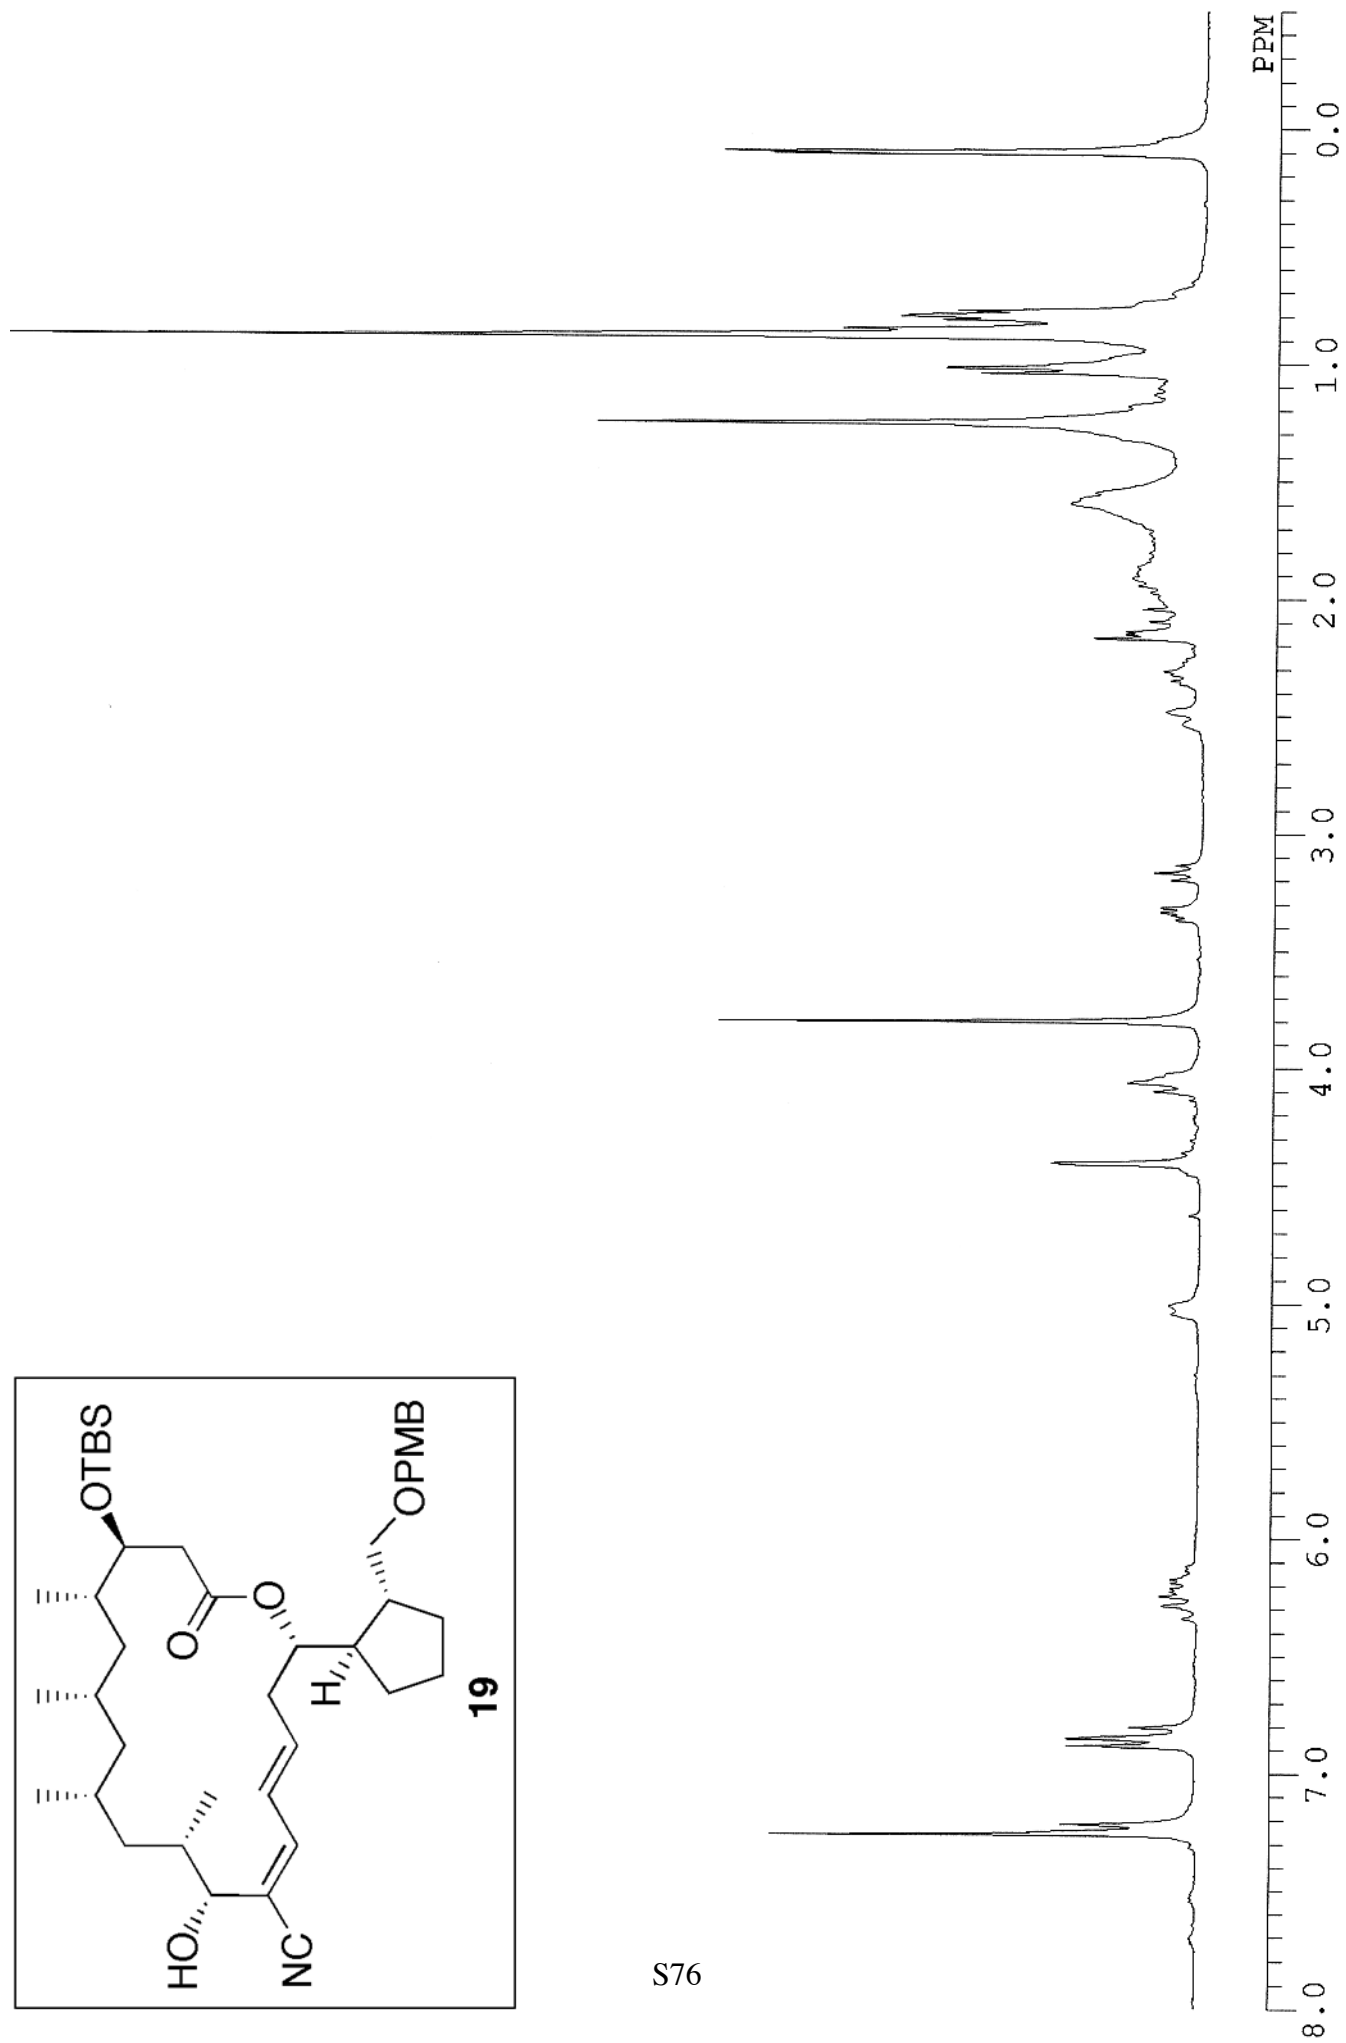

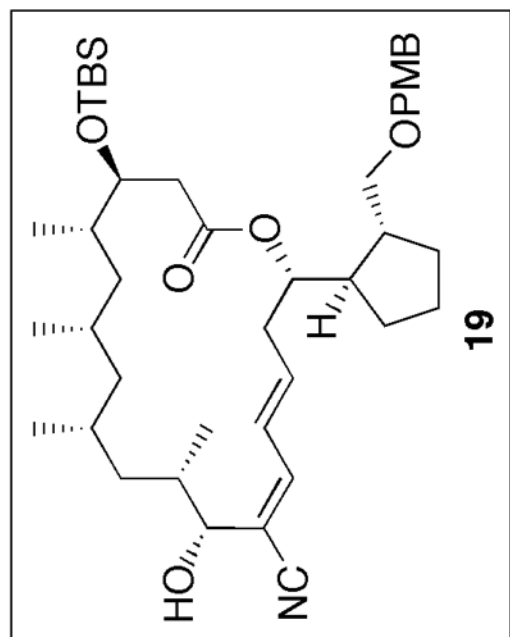

S77

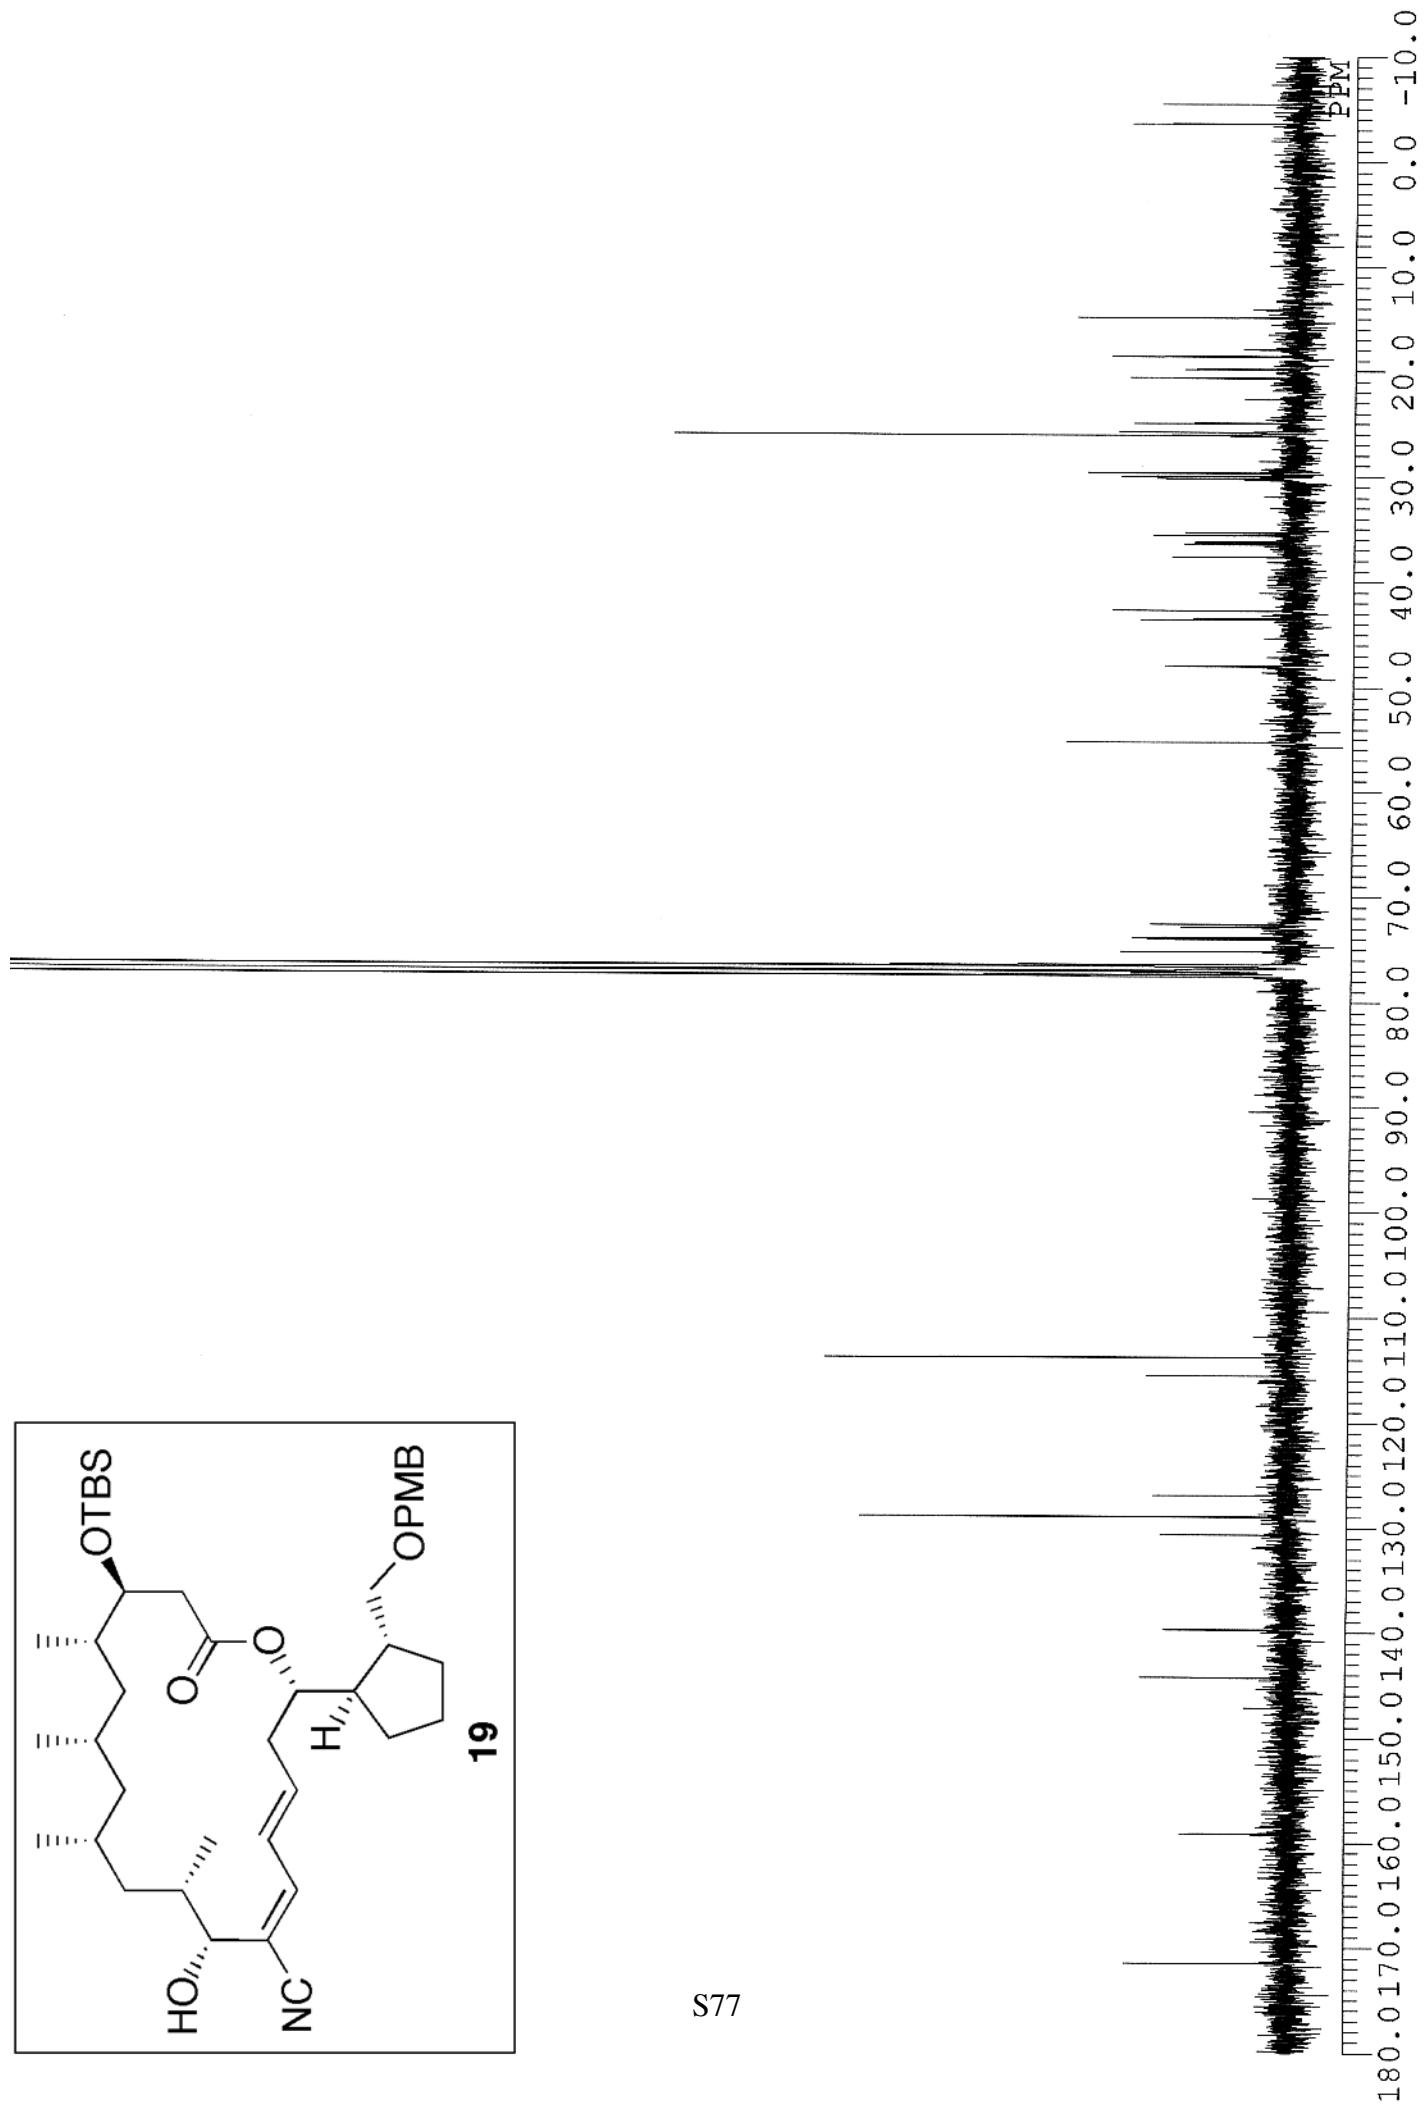

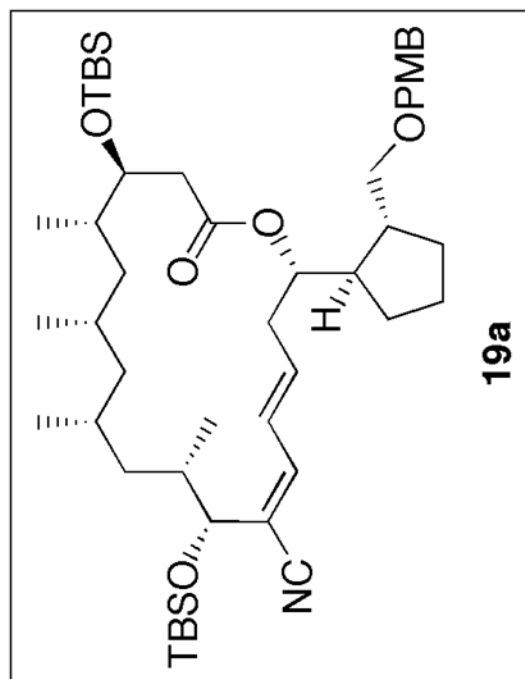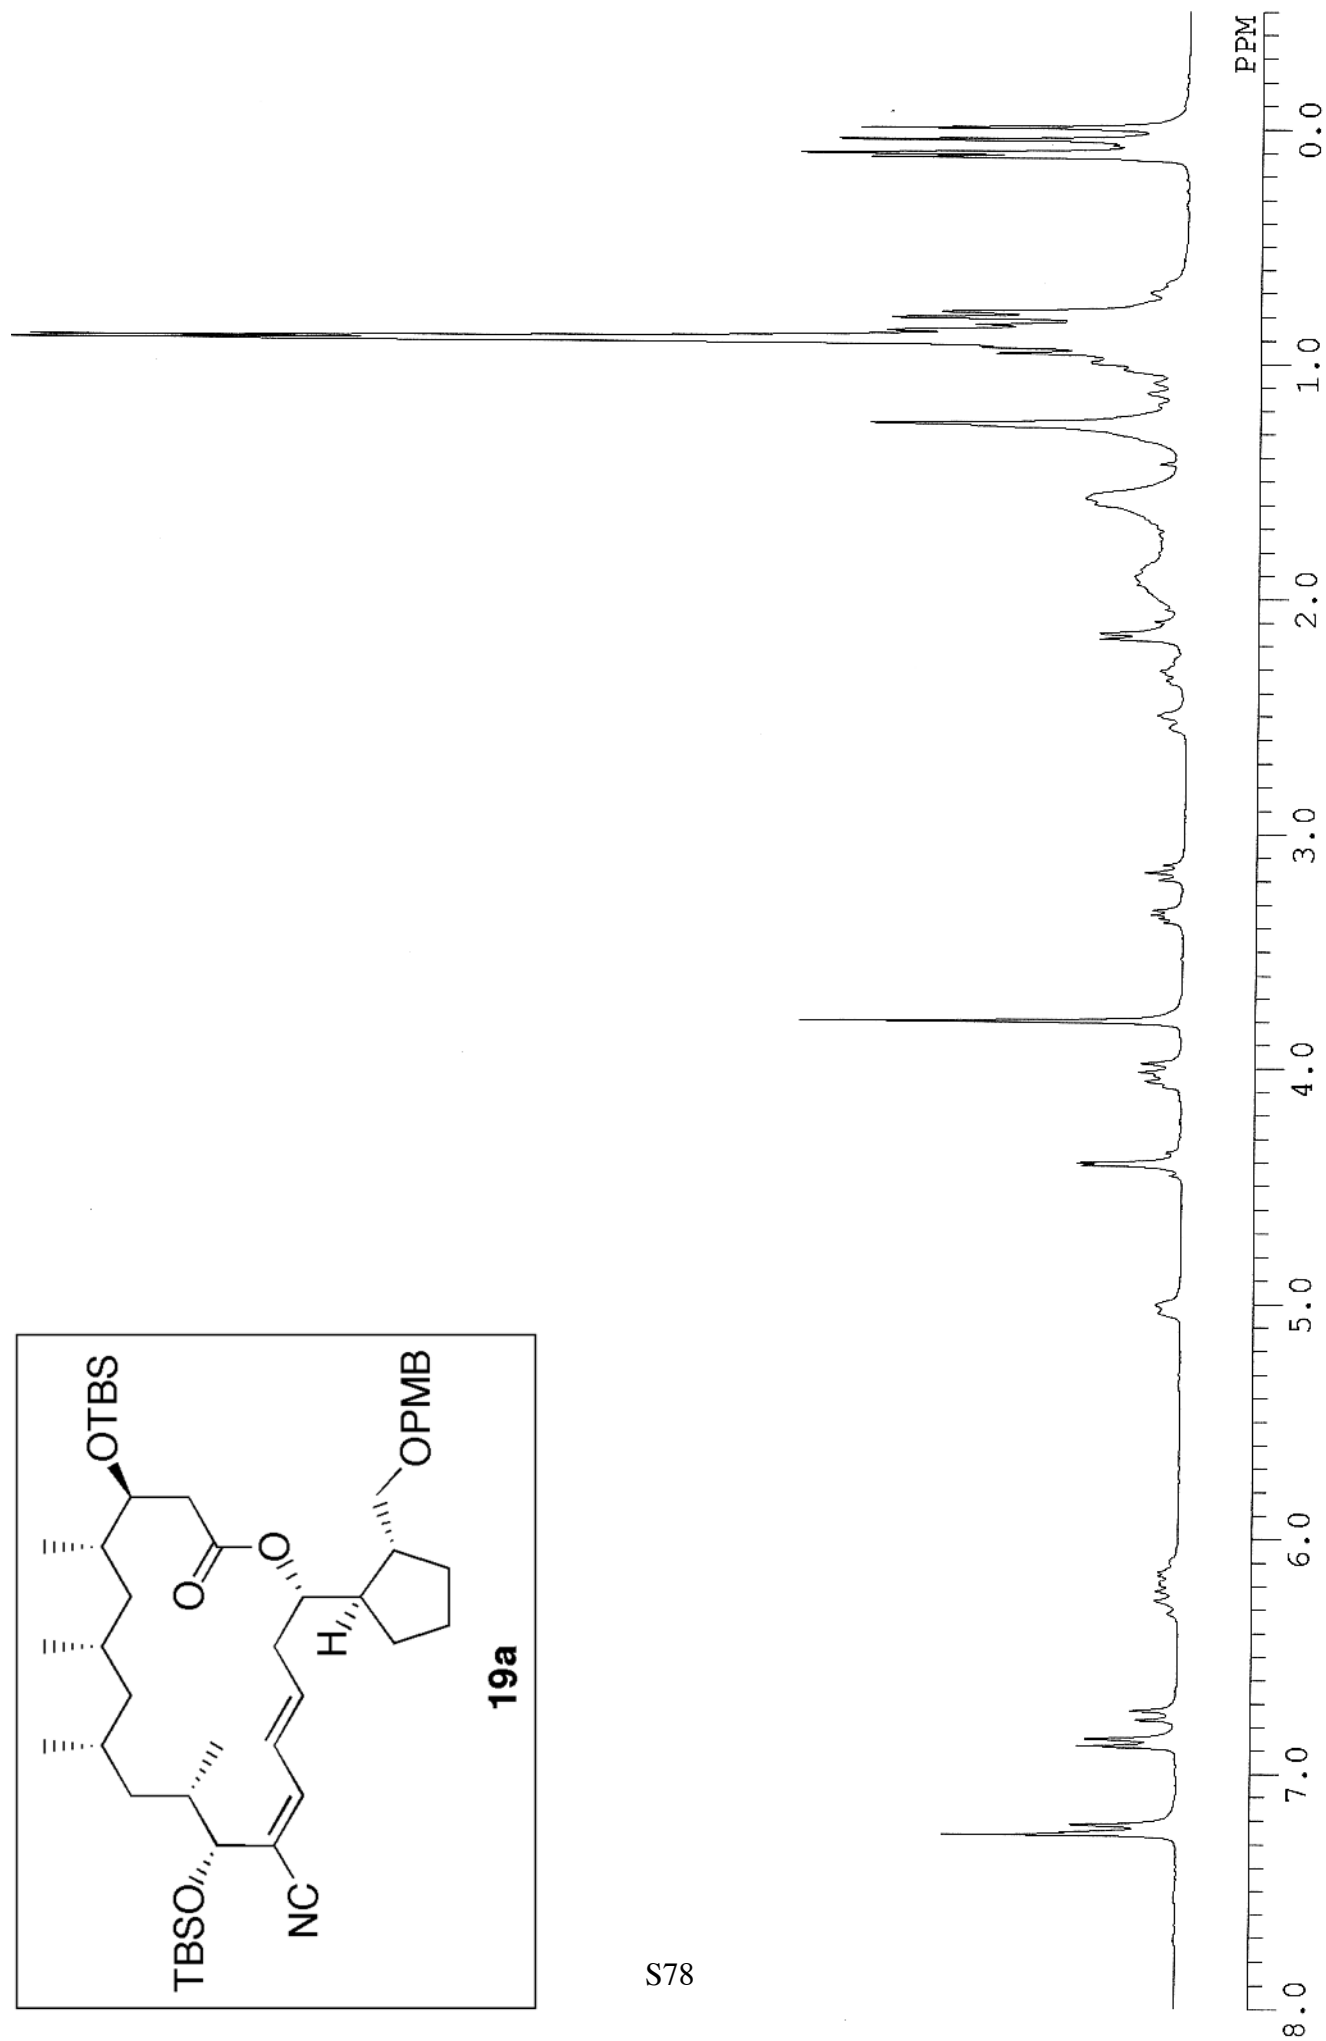

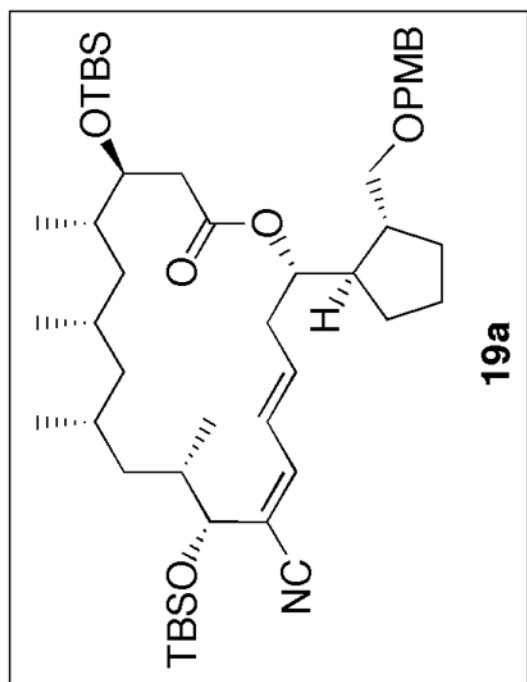

S79

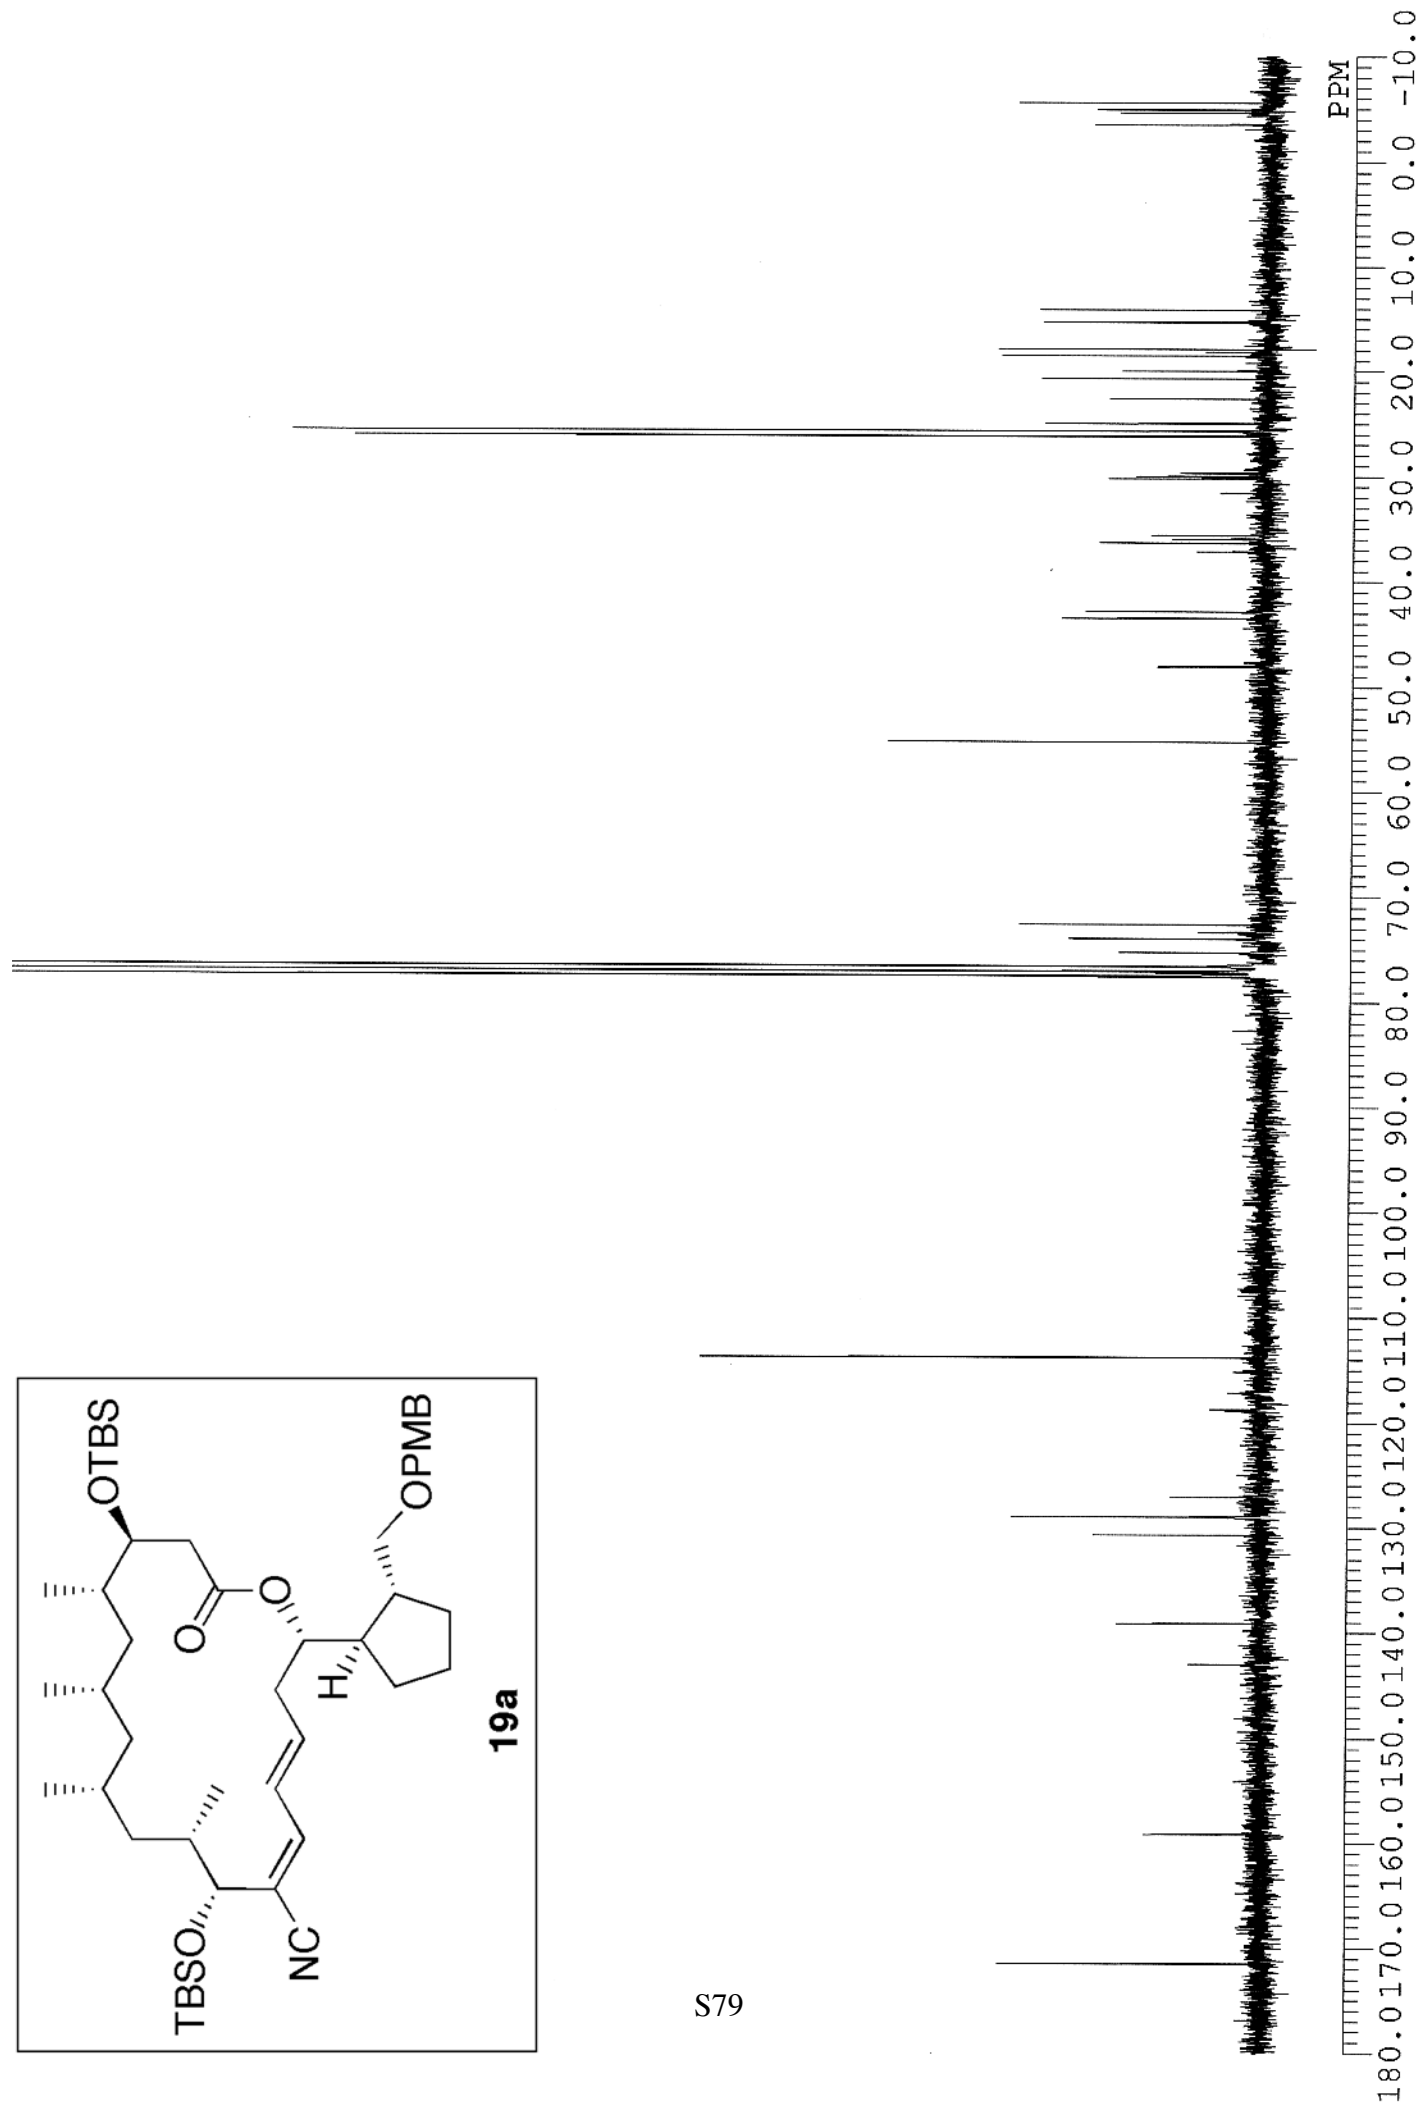

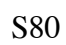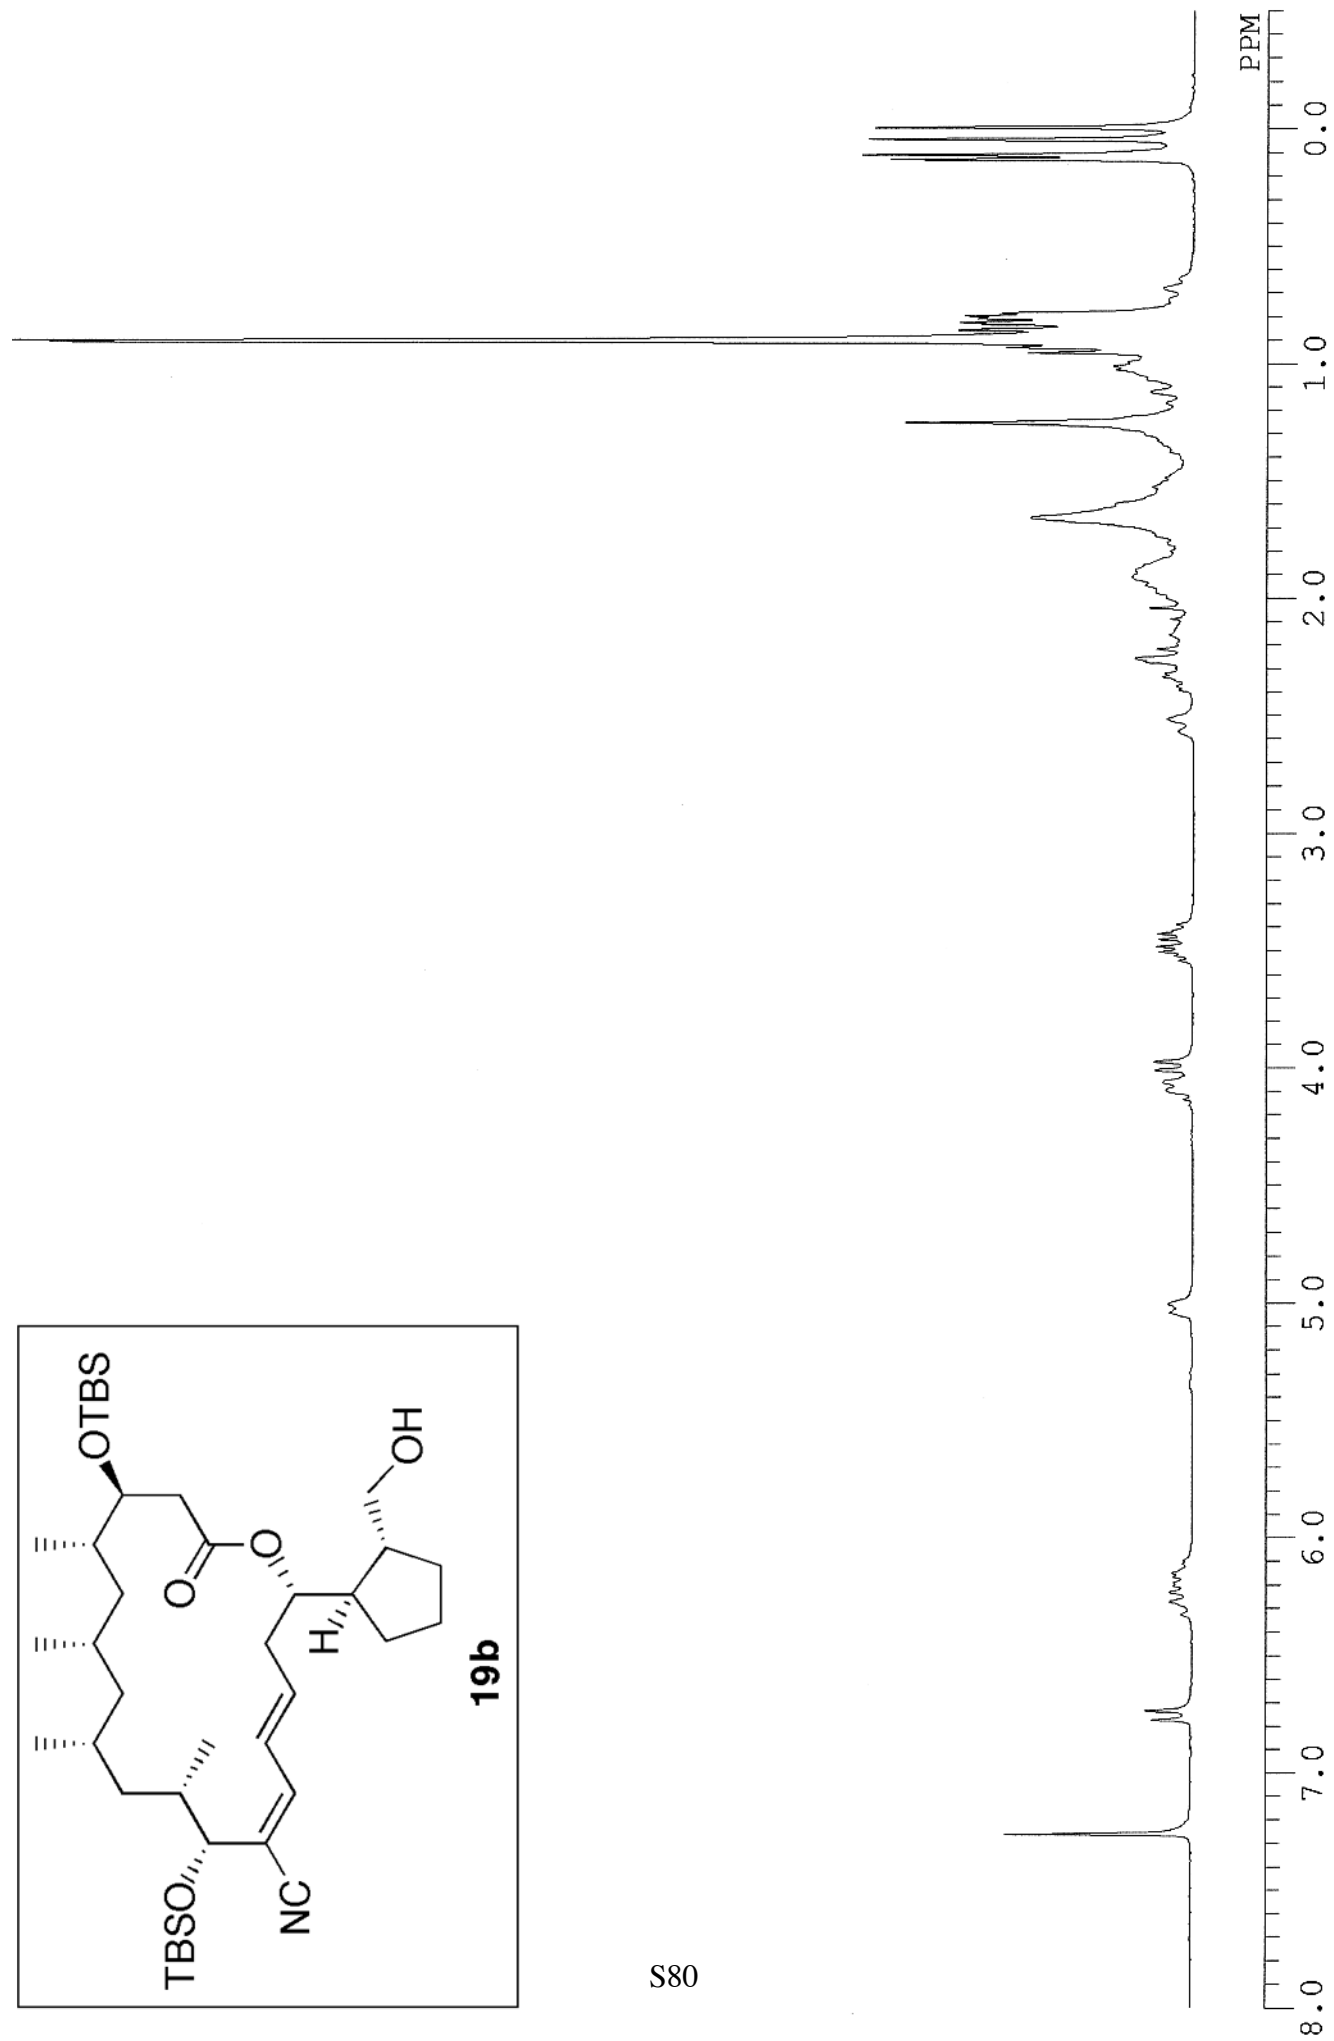



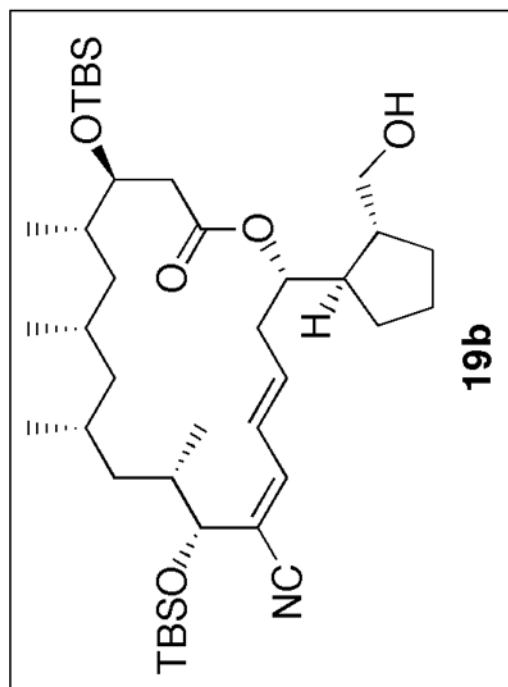

S81

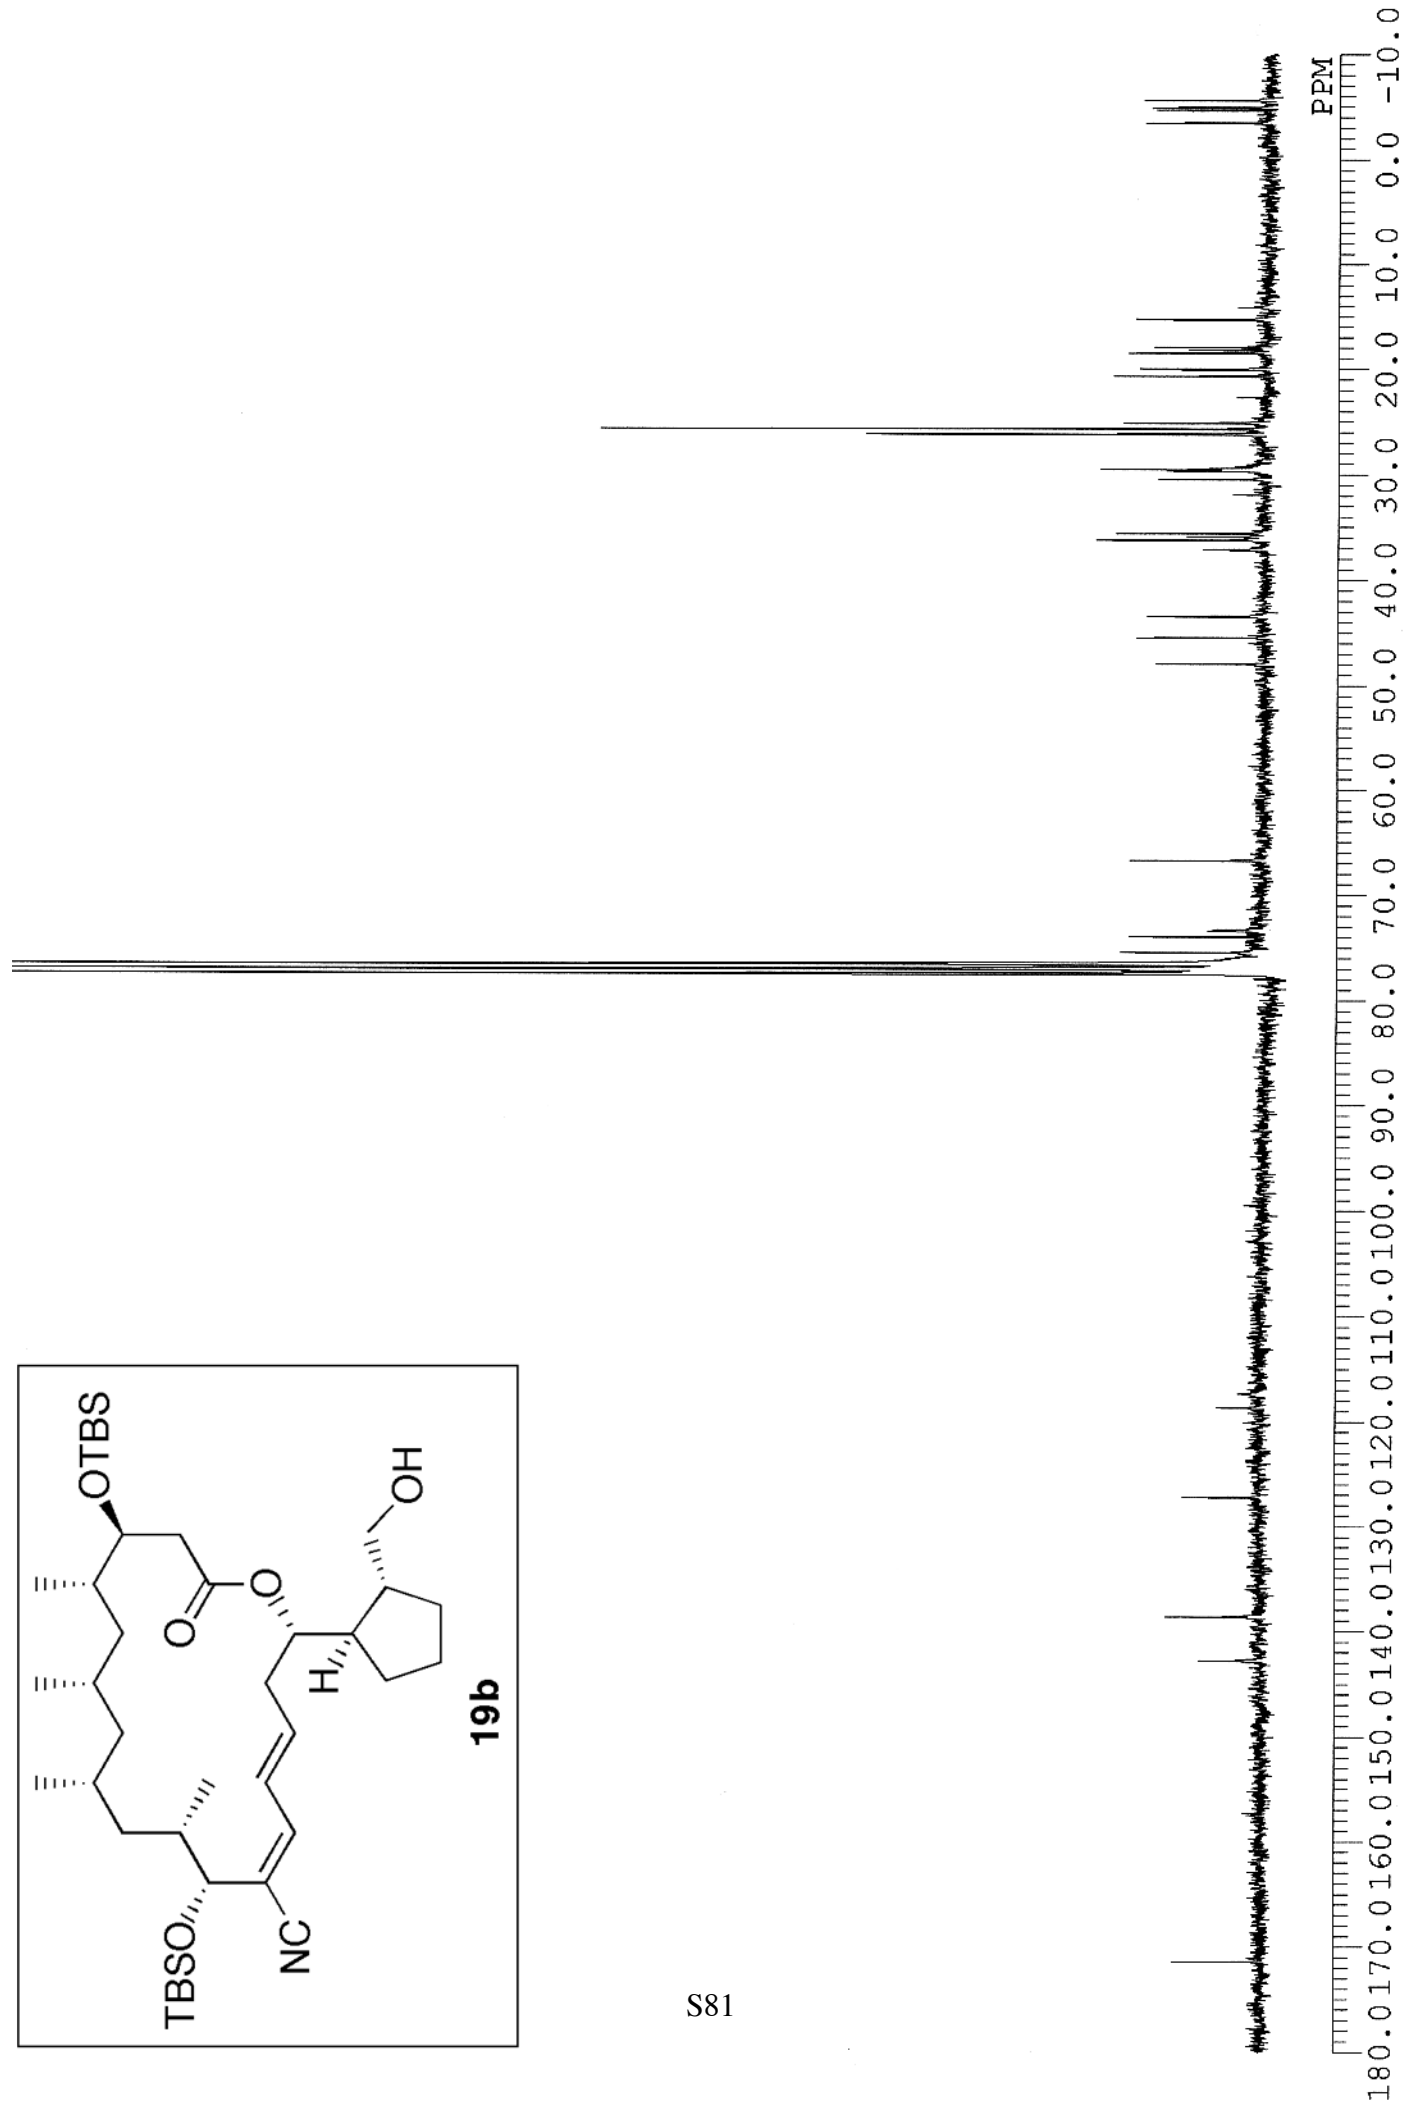

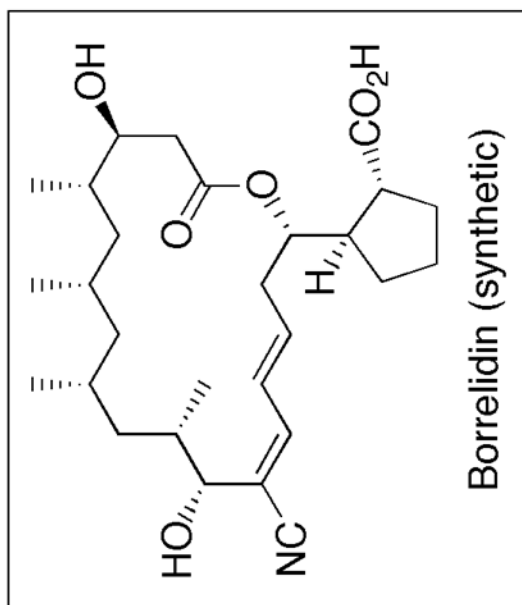

S82

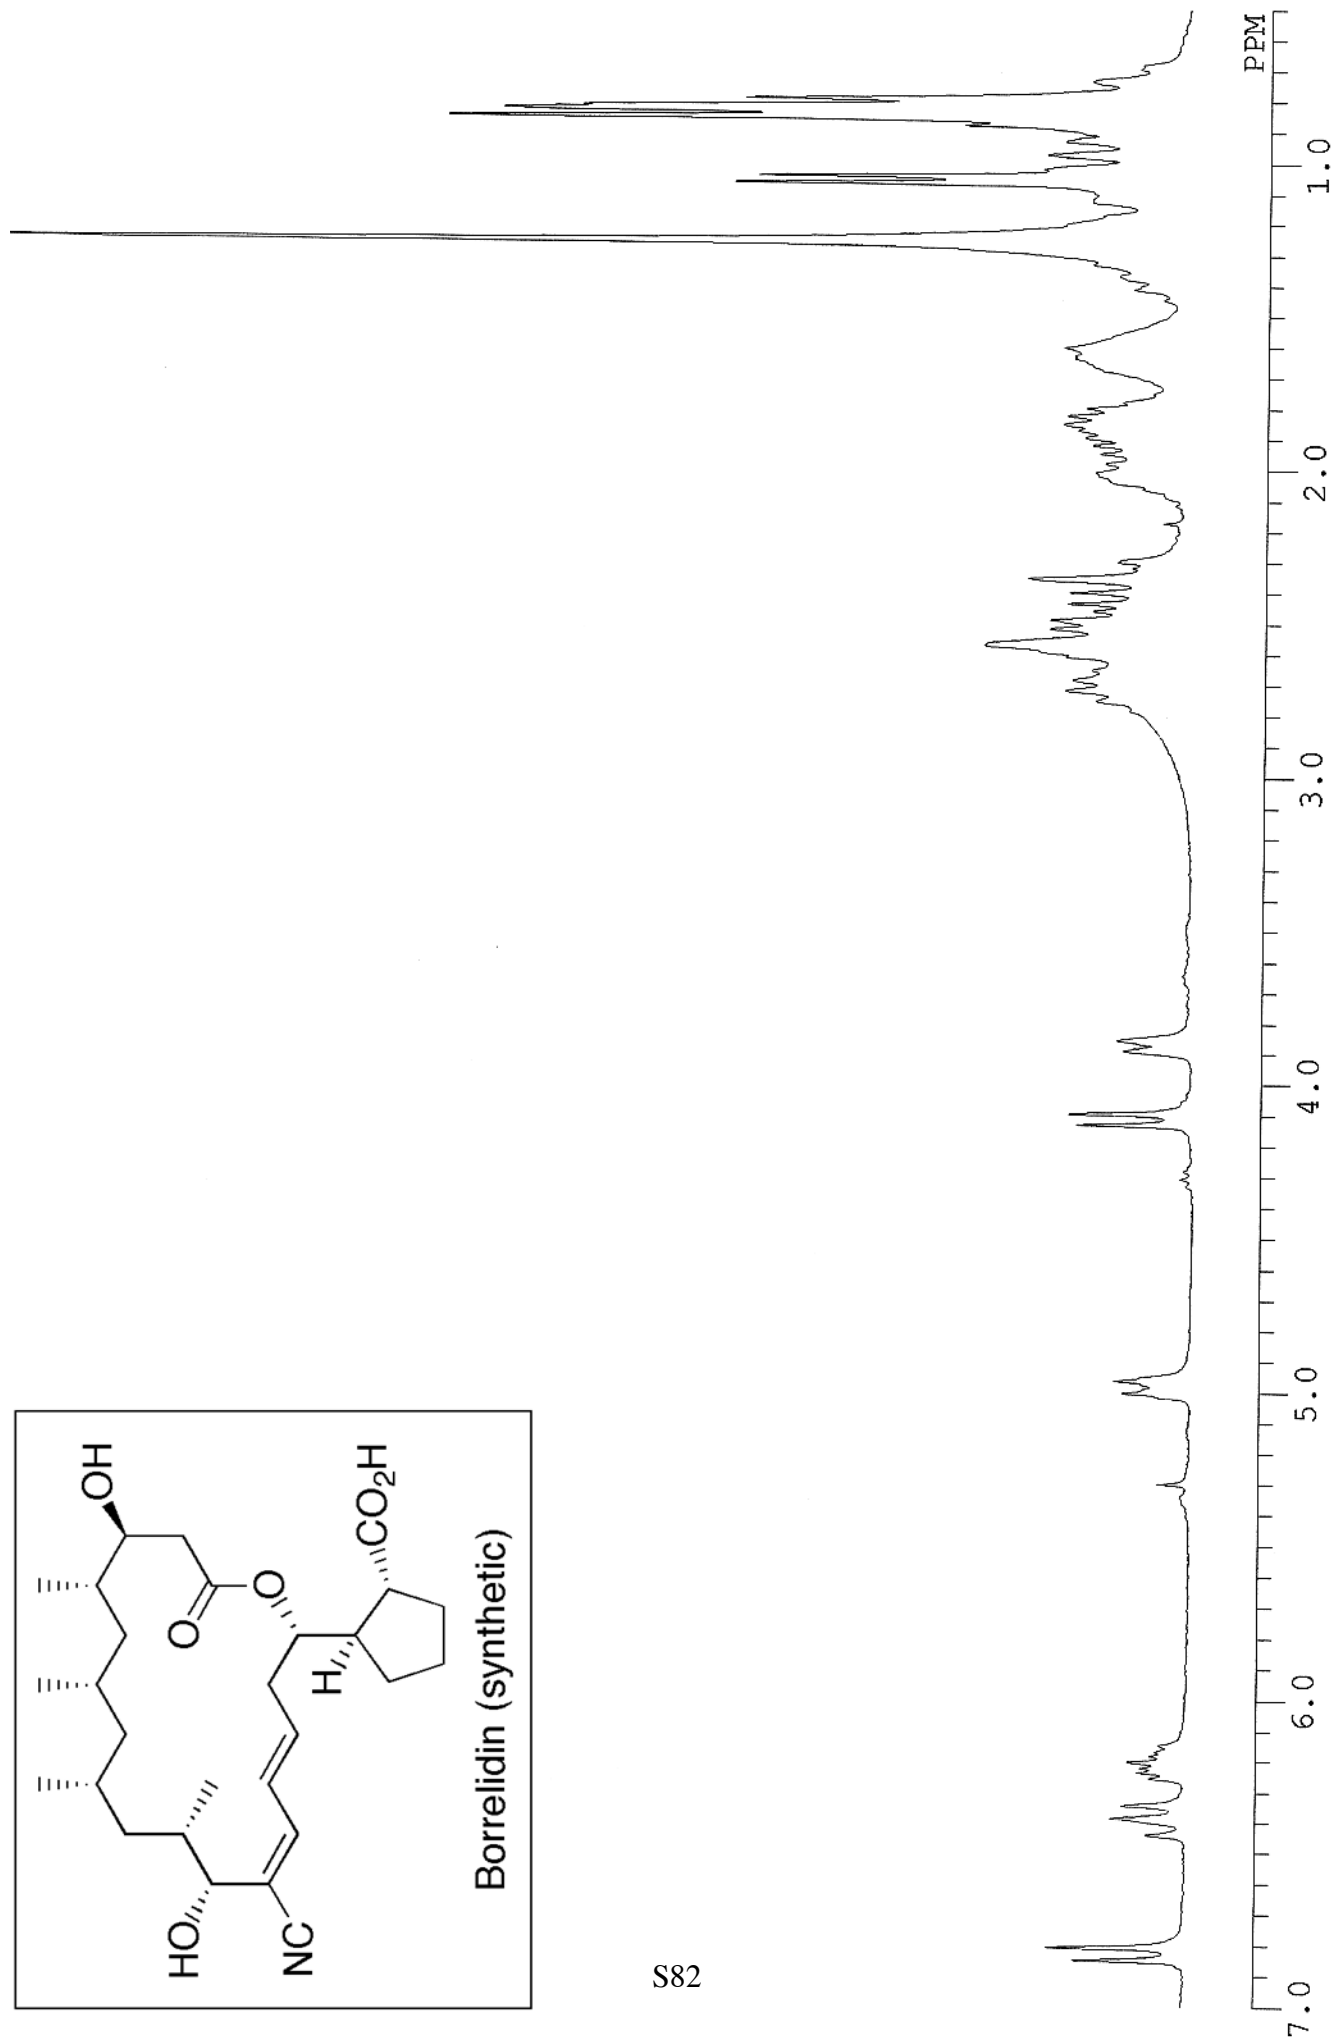

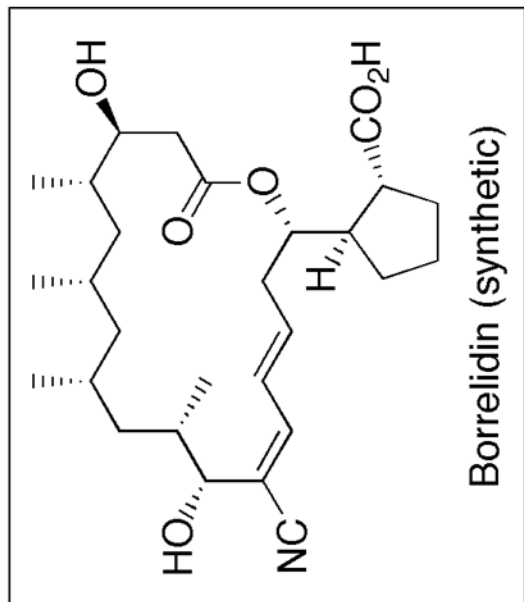

S83

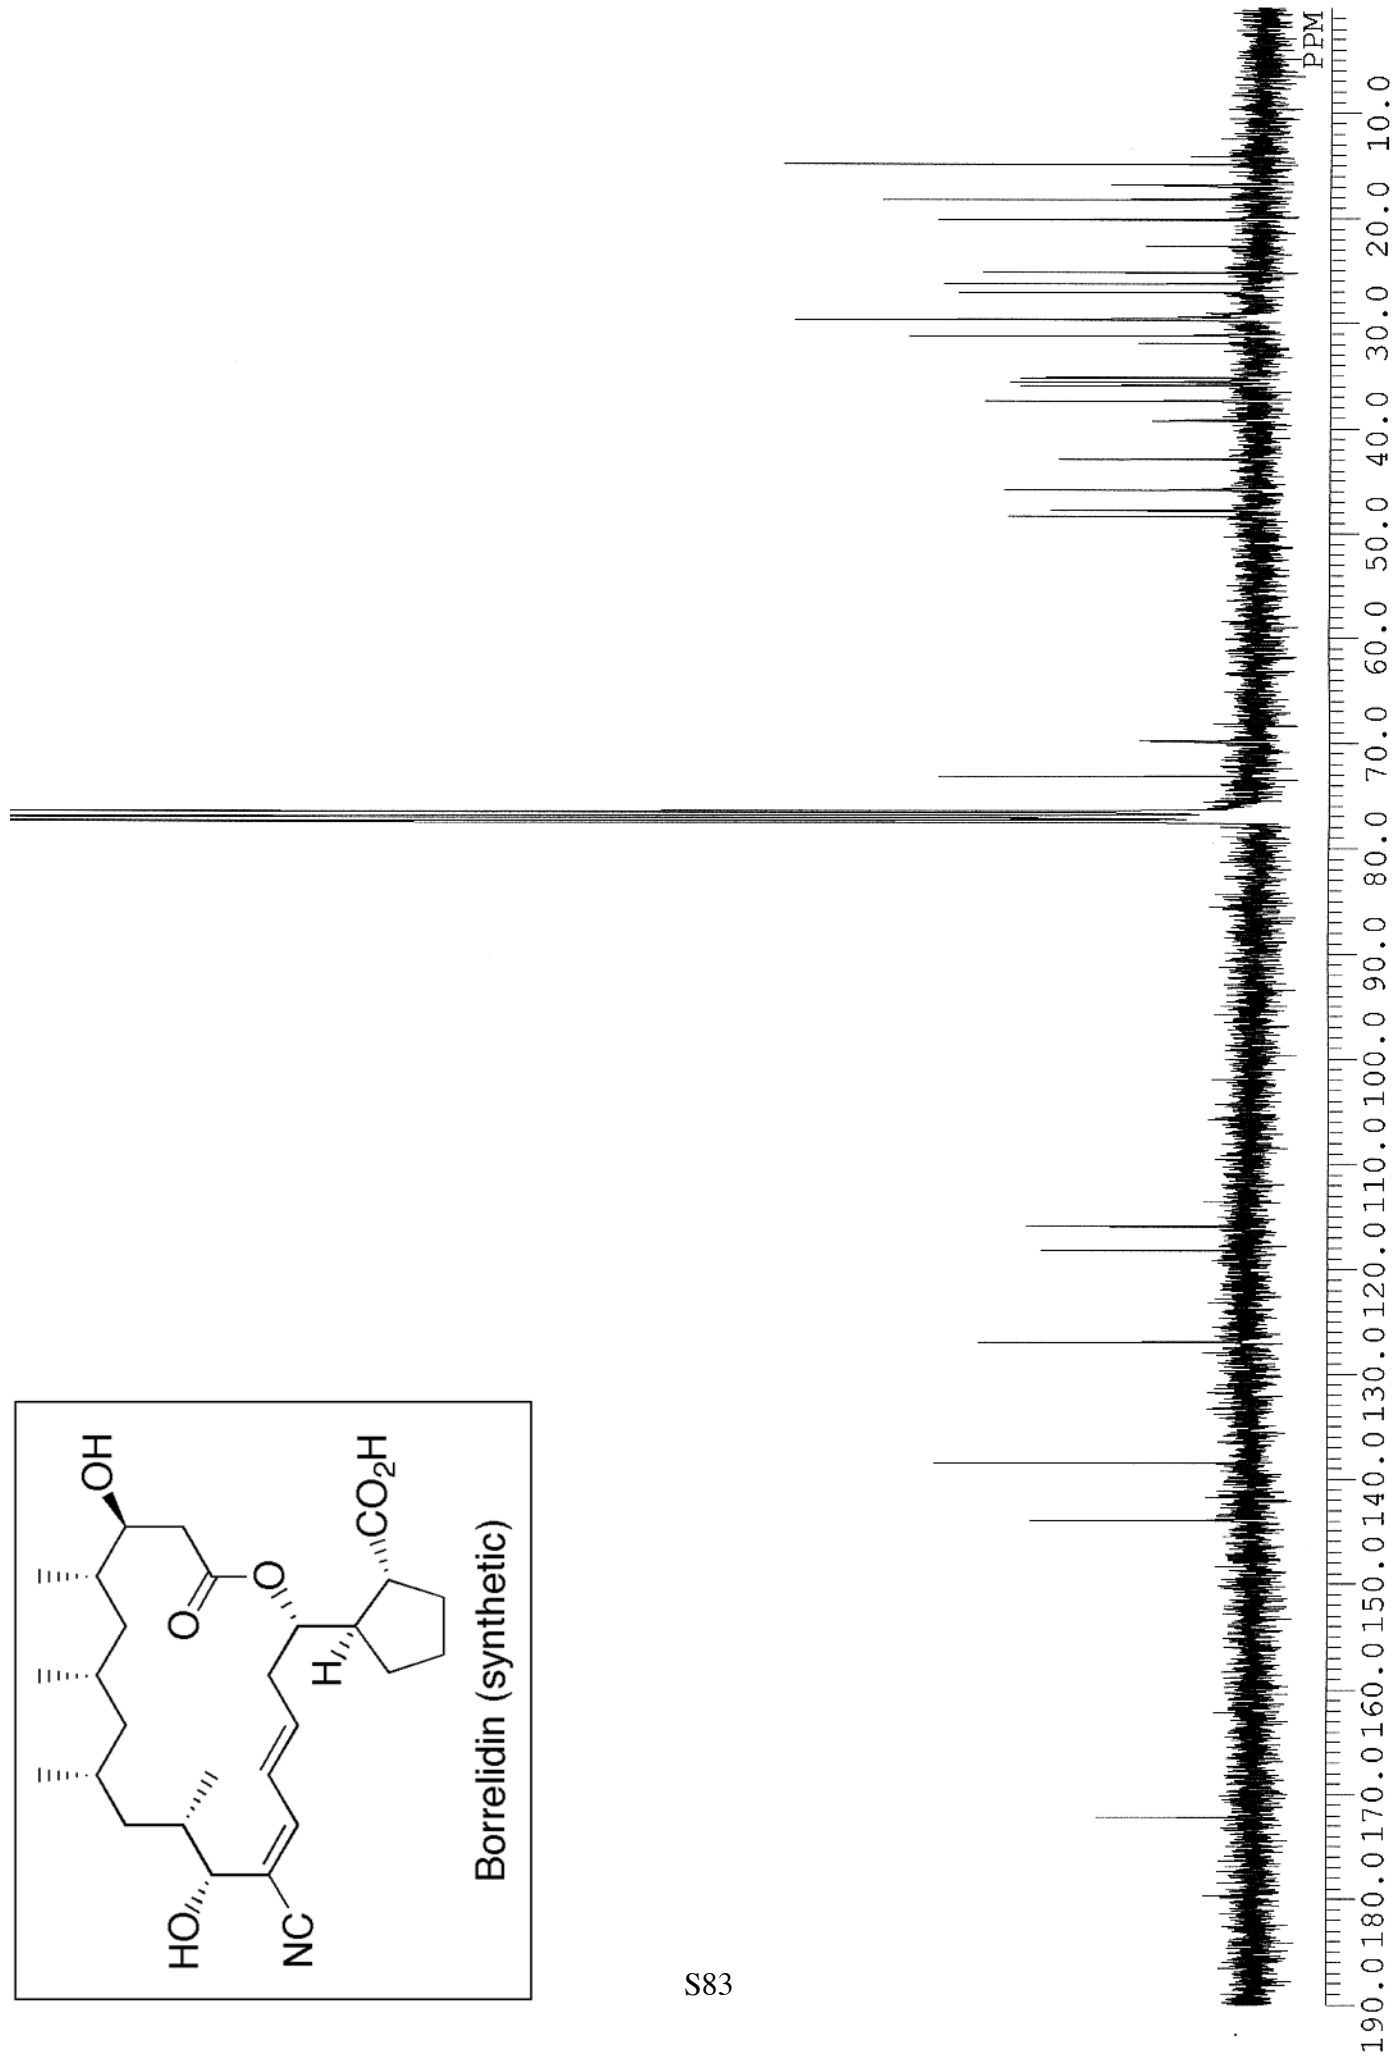

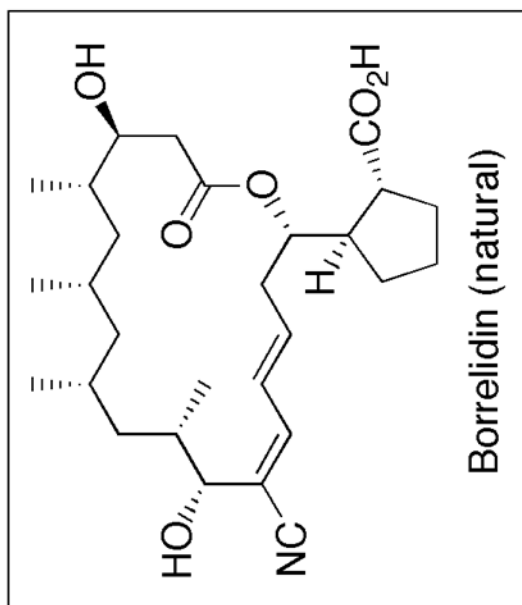

S84

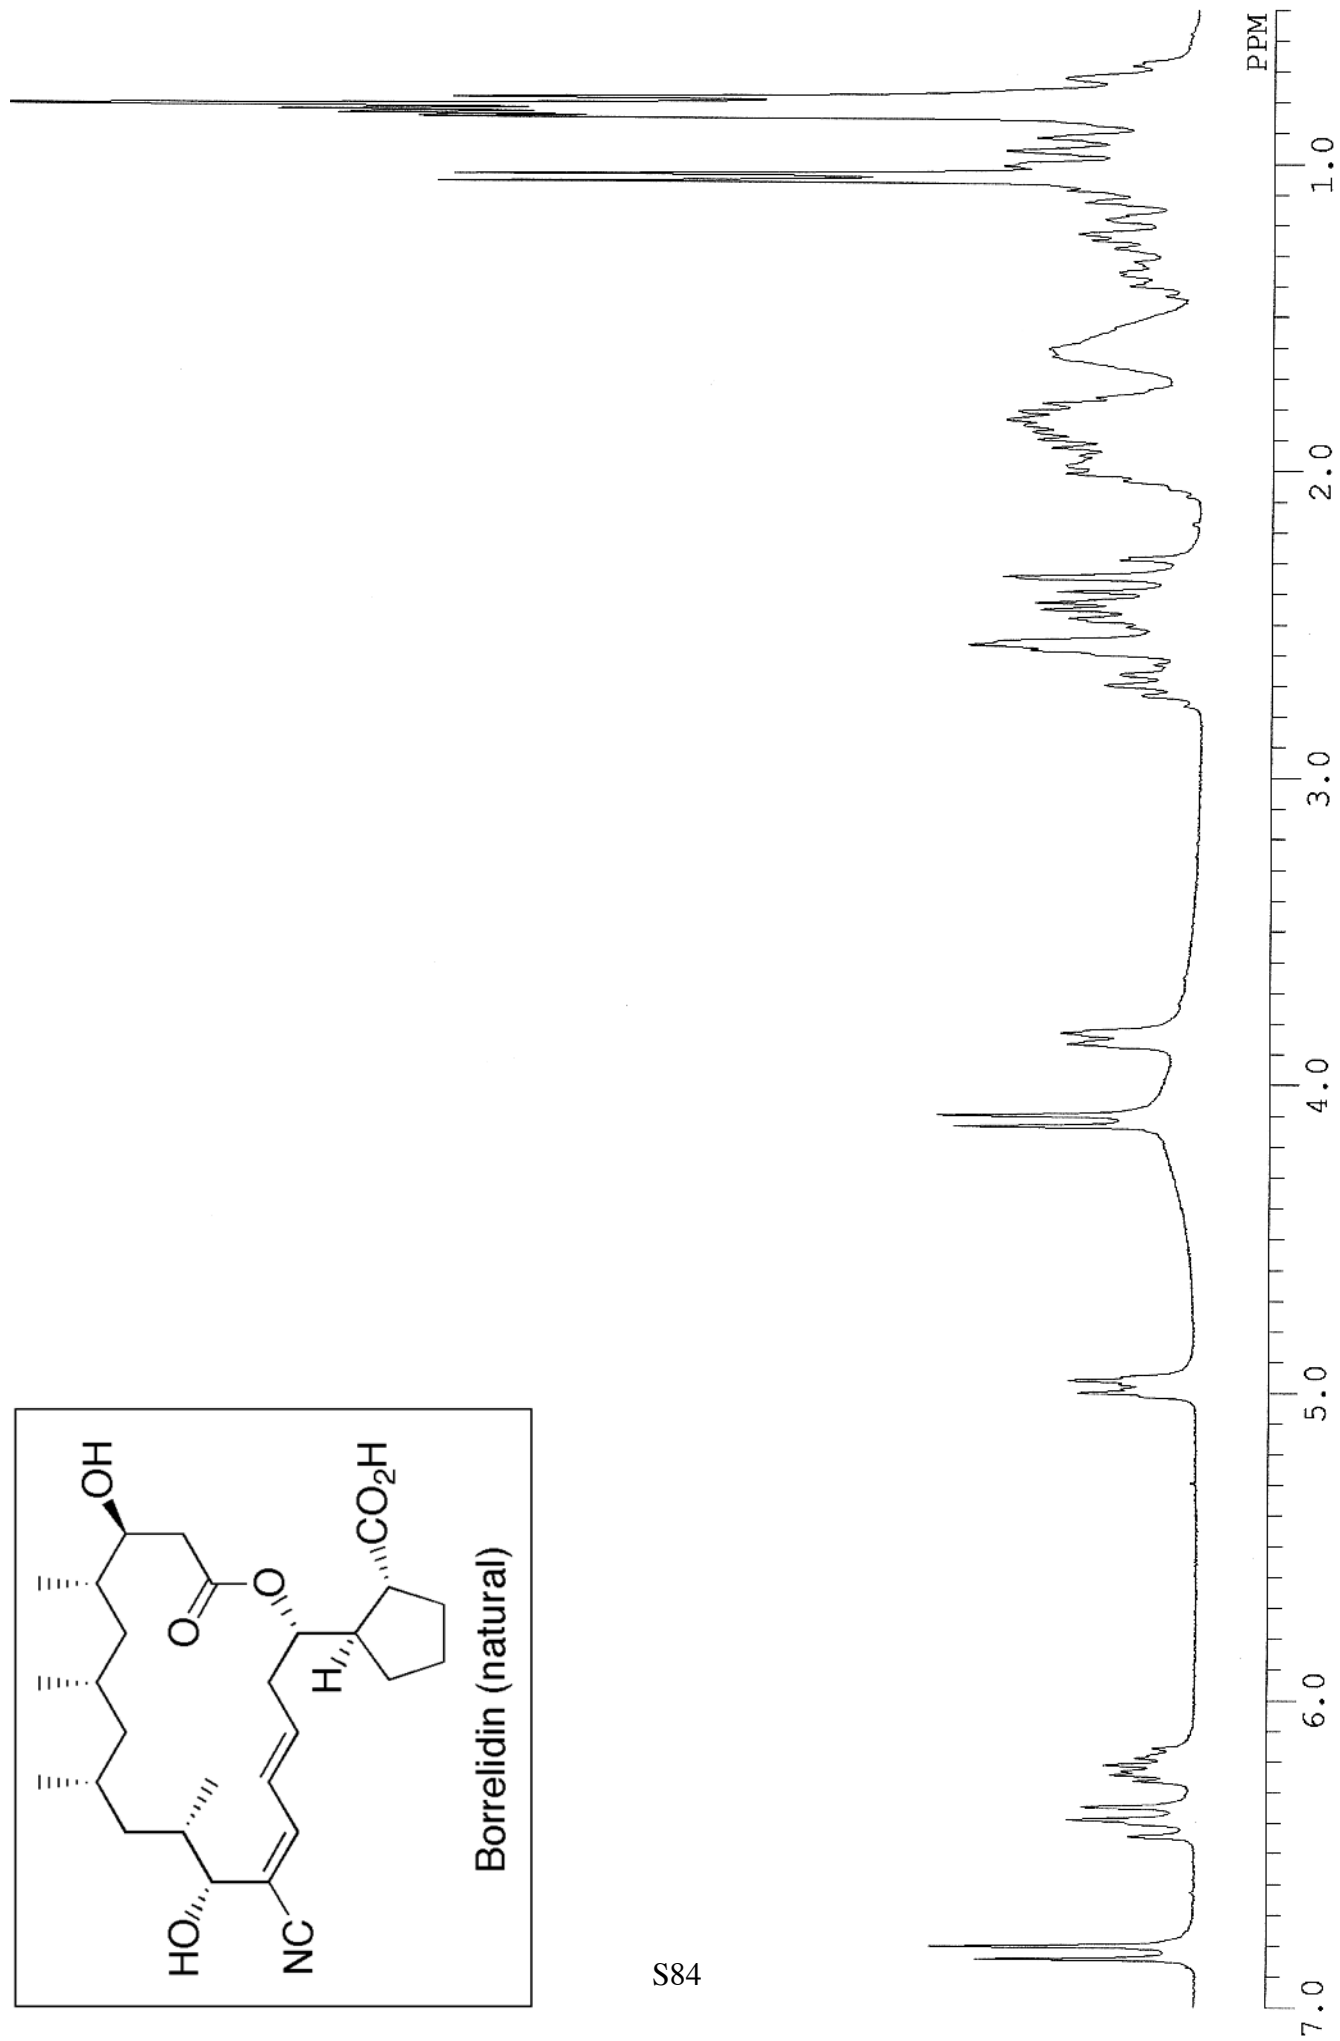

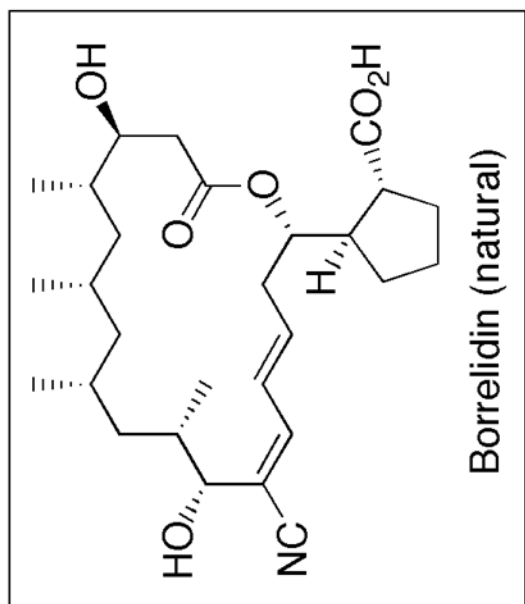

S85

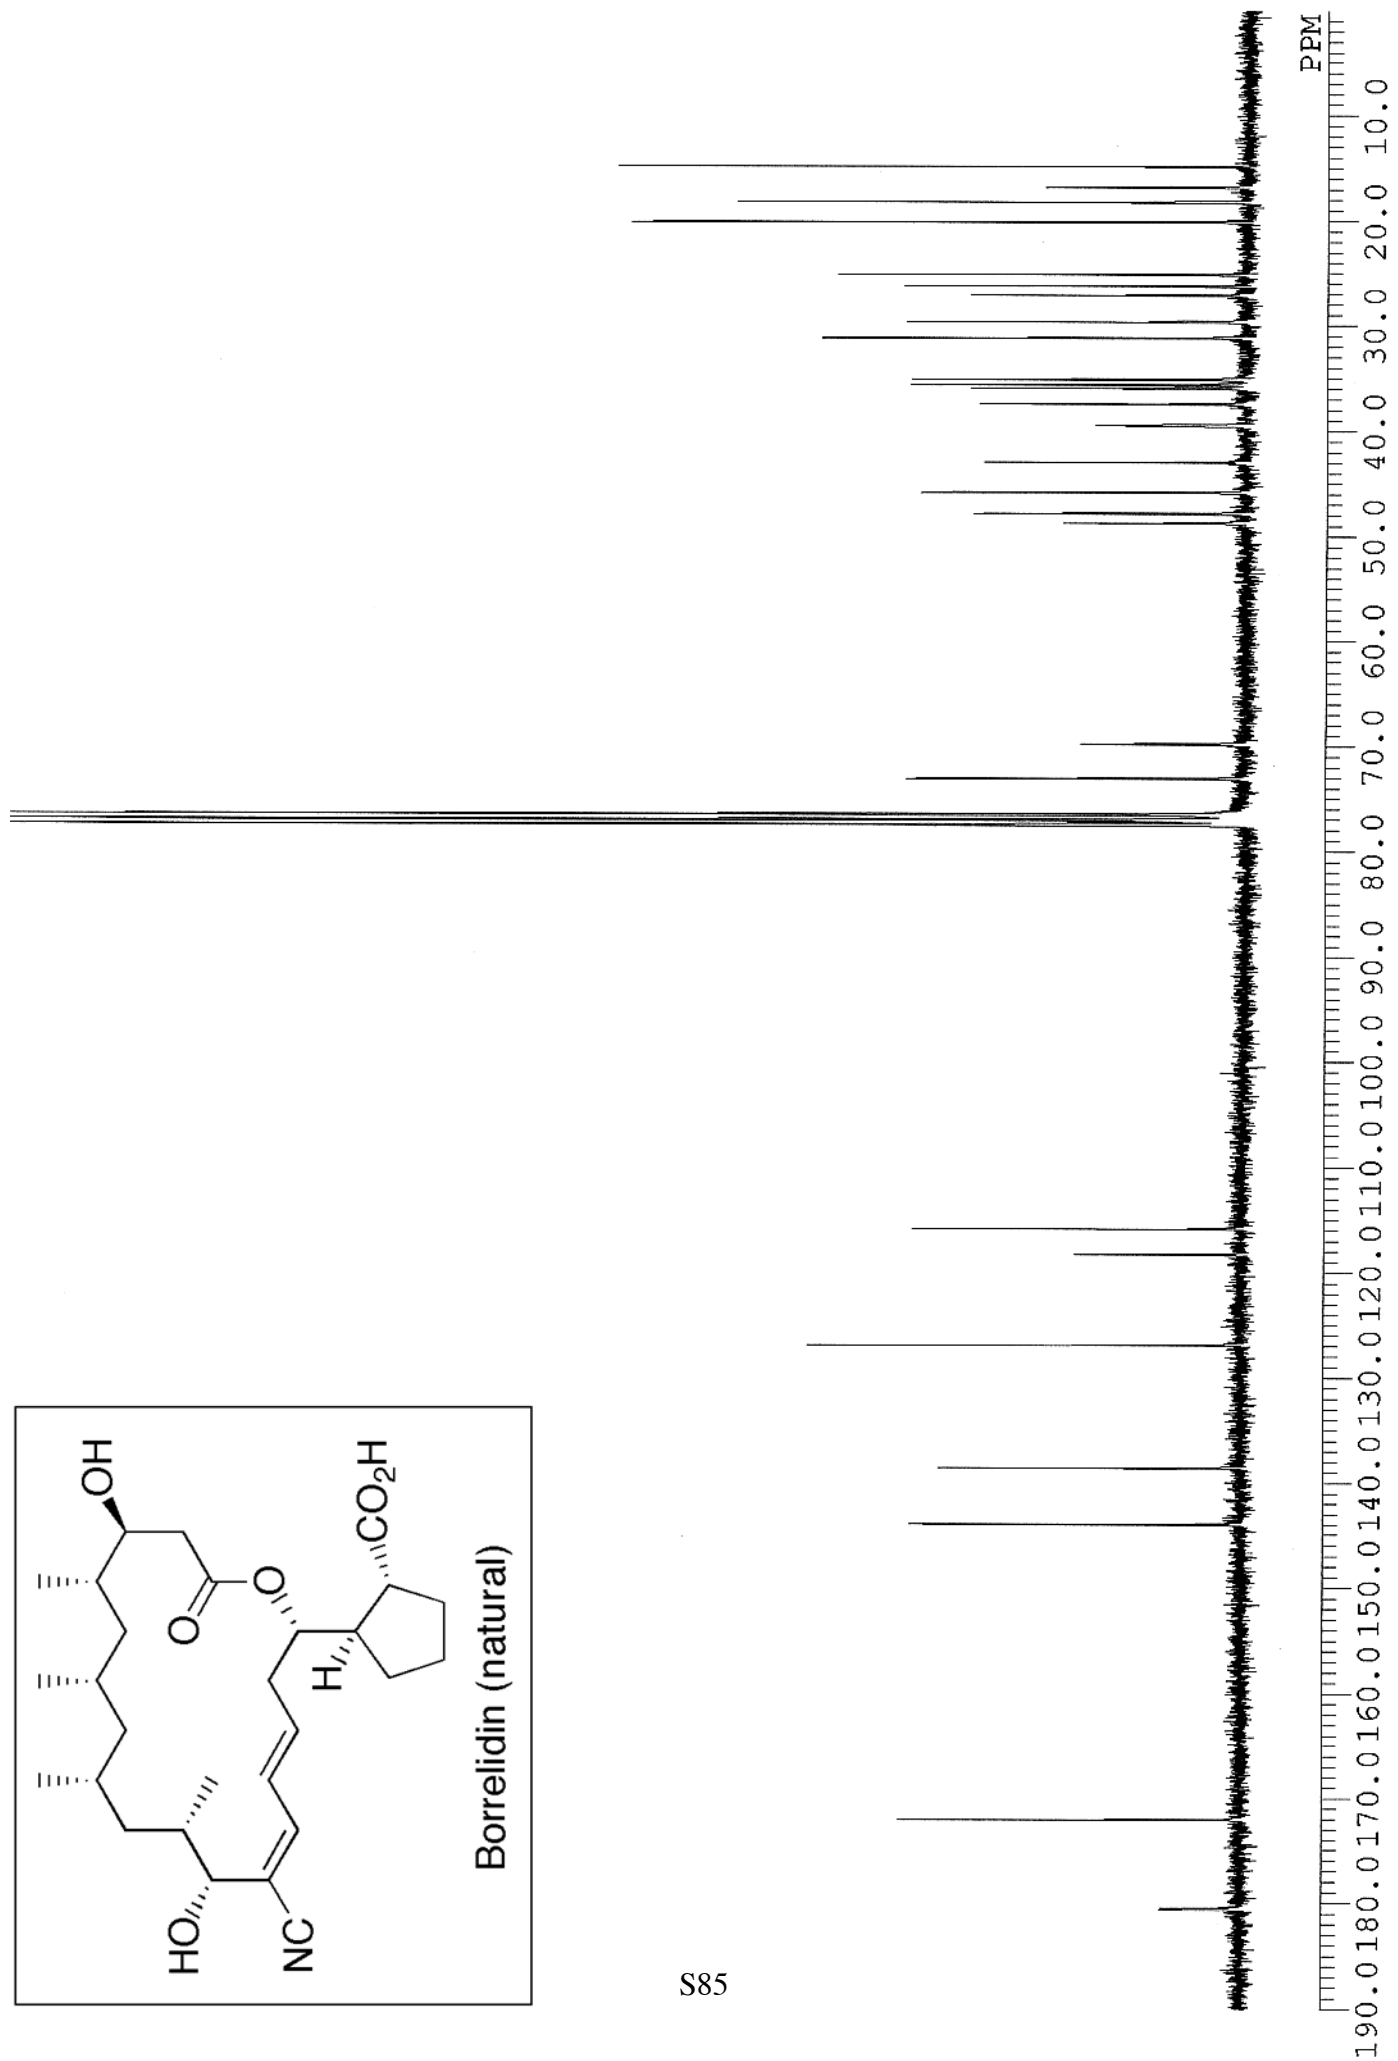

Supplement: Supplementary file 1 [file 5177308]
